# Supplementary material for: Droplet-based single cell RNA sequencing of bacteria identifies known and previously unseen cellular states
Source: bioRxiv preprint, doi:10.1101/2021.03.10.434868, version 2 (2021-03-16)
Supplement: Supplementary Tables [file 434868_file03.xlsx]

## Sheet: Table S1 B sub probe order
Supplemental table 1, B subtilis probes ordered from TWIST Bioscience
Probe #	Target gene	Sequence
1	aadK	AAGCTTTGCTCGAAGAAACTATGTTTTTGGACTTTGCTTTGAACGATGAGAGAATCCGATTGGTCACTTTGGAAGGGTCATGTATGGACCGGGTCATC
2	aadK	AAGCTTTGCTCGAAGAAACTATGTTTGATGATTGCTGTAATGAGTTCTGGATGGTTTCGACTTACGTAGTAAAAGGACTAGCATGTATGGACCGGGTCATC
3	aadK	AAGCTTTGCTCGAAGAAACTATGTTCGTTCATCAACTATAAAGTGACCCCAAATGATCGCCAATACTGGATAAAAAGGCCGATGTATGGACCGGGTCATC
4	aadK	AAGCTTTGCTCGAAGAAACTATGTGATGGCCTGGCATATCGCATCTCAGAAAGGGTATTCATTTAGTATGGGGAAGAACTGTATGGACCGGGTCATC
5	aadK	AAGCTTTGCTCGAAGAAACTATGTGATGCAAAAACCAGAAGATATGGAGCTTTTTCCTCCCGAATTAGGTAATTGGTTTTCATGTATGGACCGGGTCATC
6	aadK	AAGCTTTGCTCGAAGAAACTATGTCCCTCCTGACAACTTCCAAGATTATGACATCTCGTATTTTGTAACTGATGTAGAATCTTTGTATGGACCGGGTCATC
7	aadK	AAGCTTTGCTCGAAGAAACTATGGAATGGGAGGAACTCATGTCTACATATTCTGTGAATGGGTATCAGGAAATGTGGAAGTCTTGTATGGACCGGGTCATC
8	aadK	AAGCTTTGCTCGAAGAAACTATGGAAATGAAATCCTTTTTGCCATTGACCATTTAAATGAAATTGTACGTCCTAATTTATTGATGTATGGACCGGGTCATC
9	aadK	AAGCTTTGCTCGAAGAAACTATGCTTTTTGAGGATGGCAACAAATTAGATCTAACCCTTATTCCAATTCGTGAAGCAGAAGATGTATGGACCGGGTCATC
10	aadK	AAGCTTTGCTCGAAGAAACTATGAAAGTATTCAAAAGCTGTATCAGAAGGTCTTGCATATAAGTATCCTGATTACGATGAAGGTGTATGGACCGGGTCATC
11	aag	AAGCTTTGCTCGAAGAAACTATGGACTGAGATCATGTTTGCAGAAGCTGGGCGGGTATATACATACGTGATGCACACCCTGTATGGACCGGGTCATC
12	aag	AAGCTTTGCTCGAAGAAACTATGGACGAGAGAAAAAAATCCGCTGCCCATCACGTTTTATCAAAAAACCGCTCTTGAGCTTTGTATGGACCGGGTCATC
13	aag	AAGCTTTGCTCGAAGAAACTATGGAATGACTACGGACGCTGGATCACGGAACAGCCGCTTTACATCGAAAGCGGGTACTGTATGGACCGGGTCATC
14	aag	AAGCTTTGCTCGAAGAAACTATGCAGCTGTTAATGGAGGAGAGAAGGCCGGGCAGGAGTCCGAGGGAATGGACAAACGTGTATGGACCGGGTCATC
15	aag	AAGCTTTGCTCGAAGAAACTATGATTGCTGAATGTCGTTGCGGCGGAAGAGGATGTCCCGCAAGCAGTATTAATCAGGTGTATGGACCGGGTCATC
16	aag	AAGCTTTGCTCGAAGAAACTATGATCGGCATTGACAACAGCGGGGAGGCACGCGATTATCCATGGCGTTTCTGGGTGACTGTATGGACCGGGTCATC
17	aag	AAGCTTTGCTCGAAGAAACTATGAGAAACAGACGAAGGCACAGCGTCAGGCTATATTGTGGAAACAGAGGCCTATATGGGGTGTATGGACCGGGTCATC
18	aapA	AAGCTTTGCTCGAAGAAACTATGTTTTCATTATGCGTTCGCTCGGAGAACTGCTCTTATCAAATGCGGGATACCACTCTTTTGTGTATGGACCGGGTCATC
19	aapA	AAGCTTTGCTCGAAGAAACTATGTTTAACACTTGCATTTCTCGCGTTCATTCTTGTCATATTGGCACTGGCGAATGATACACGTGTATGGACCGGGTCATC
20	aapA	AAGCTTTGCTCGAAGAAACTATGTTGGCCAGCAACAGAAATTGTCTAGAGGCCTTAAAAACAGGCATATACAATTAATGGCGATGTATGGACCGGGTCATC
21	aapA	AAGCTTTGCTCGAAGAAACTATGTTGGAGGTGCAATCGGTACAGGTTTATTTTTAGGTTCAGGTAAATCCATCCATTTTGCAGTGTATGGACCGGGTCATC
22	aapA	AAGCTTTGCTCGAAGAAACTATGTTCTTCTAACGTGCCAAGCAATGCGCTGTTCTTTTCATCCATCGCCATTCTGATTTGTATGGACCGGGTCATC
23	aapA	AAGCTTTGCTCGAAGAAACTATGTGTTTGTCACCCCGGTCTGGTTTGTTTTATTGATTATTTTGTATAAGGTGCAAACCCGCATGTATGGACCGGGTCATC
24	aapA	AAGCTTTGCTCGAAGAAACTATGTGCCCGAGCAAGTCTTCACGCTGATTACAAGTGTTTCAACAATATGCTTCATTTTTTGTATGGACCGGGTCATC
25	aapA	AAGCTTTGCTCGAAGAAACTATGTCTTCTTGCGCTTATTATCCTGCTGATCATGAACCTTGCCACCGTTAAACTTTTCGGAGATGTATGGACCGGGTCATC
26	aapA	AAGCTTTGCTCGAAGAAACTATGGCACAAGCCGAATGGTCTATTCACTTGCAAAGGATCATCACGCACCTGGACTATTTGTATGGACCGGGTCATC
27	aapA	AAGCTTTGCTCGAAGAAACTATGCATTTGTTCAGGTCTTCTCTGCAGTAGGCATCGTTGTGGCTGCCAGTTTGATCAATTGTATGGACCGGGTCATC
28	aapA	AAGCTTTGCTCGAAGAAACTATGATTGCCATACTGGCTCTGATCGTAACTGGTATTCTCCTGATTGCGAAAGGTTTTTCCGCTGTATGGACCGGGTCATC
29	aapA	AAGCTTTGCTCGAAGAAACTATGACGGTGATTTGCCATTTGAAATATCGAAAAACAAGGCAGCATGAAGCGAAAGCAATGTATGGACCGGGTCATC
30	aapA	AAGCTTTGCTCGAAGAAACTATGAATGGATGGCATGGGTTTATCCTATCTTTCCAAATGGTCGTCTTCGCTTTCGTGGGTATTGTATGGACCGGGTCATC
31	aapA	AAGCTTTGCTCGAAGAAACTATGAAACATGGCAGCATTTATCACTGGGTGGACCTACTGGTTCTGTTGGATTTCCCTCGTGTATGGACCGGGTCATC
32	abbA	AAGCTTTGCTCGAAGAAACTATGTTGCGAATGAGTCTTATCGGTGAACGATTTACAGAAGAAGAACAAAAACTTCTGCTGAATGTATGGACCGGGTCATC
33	abbA	AAGCTTTGCTCGAAGAAACTATGTGCCATCGAGCTATTAAGCAGTGAGATCAACGATATAGAGACAGGGACCAAAAACGTTGATGTATGGACCGGGTCATC
34	abbA	AAGCTTTGCTCGAAGAAACTATGCGGAACCACCTACAAAAAACTTGTAACGCTATACGACCGATTTCGATTTGAAAATTTGTATGGACCGGGTCATC
35	abf2	AAGCTTTGCTCGAAGAAACTATGTTTCTGGAAGGGCAAAGGATCAGCCACAGAATTCACGGAAGATGAATGGTTTATTACGATGTATGGACCGGGTCATC
36	abf2	AAGCTTTGCTCGAAGAAACTATGTGAGCATTTAGGAAGAGGGATTTATGAGGGGATCTGGGTCGGAACGGACTCAGACTGTATGGACCGGGTCATC
37	abf2	AAGCTTTGCTCGAAGAAACTATGTGAAAAAAGCCGCTGGCCTGATGGACGGGTTGAGTCTTCATTATTACACGATTCCTGTATGGACCGGGTCATC
38	abf2	AAGCTTTGCTCGAAGAAACTATGTAACACGTTTGACGATCCTCATCATGTCAAACCGGAATCCTTCAGACAATACACGCTCTGTATGGACCGGGTCATC
39	abf2	AAGCTTTGCTCGAAGAAACTATGGGCAACATGCATCCCGAATACTACGCAGATCTGTACCGGCGTTTTCAGACTTATGTCTGTATGGACCGGGTCATC
40	abf2	AAGCTTTGCTCGAAGAAACTATGCTTATATCAGCAAAACACCATTCGTGATGCACTGGTGGCGGCTTCTCATTTCCACTGTATGGACCGGGTCATC
41	abf2	AAGCTTTGCTCGAAGAAACTATGCGGTGACCGTAAGACAATGCTGAACACTCACTGGGGCGGTACAATTGAATCAAATTGTATGGACCGGGTCATC
42	abf2	AAGCTTTGCTCGAAGAAACTATGCCTACACAAGGCAGCGGACCATTCCGGAGTCATTCTTACGGCAGAAAAAATGAATTGTATGGACCGGGTCATC
43	abf2	AAGCTTTGCTCGAAGAAACTATGCAAACTGAAAGTAAAACTCCCGCCAATGTCAGTCGTCTTACTTACGCTGCGTGCTGATTCTGTATGGACCGGGTCATC
44	abf2	AAGCTTTGCTCGAAGAAACTATGATGTTTAAGGTGCACCAGGACGCTTCTCTTTTAGCCACAGAGACAATGTCTGCCGACTTGTATGGACCGGGTCATC
45	abf2	AAGCTTTGCTCGAAGAAACTATGATGGAAGAGAAGAGCCTTGGAAGCTGAAATATTTCGGCGTGGGCAATGAAAACTGTGTATGGACCGGGTCATC
46	abf2	AAGCTTTGCTCGAAGAAACTATGATGAATTTATGATGCTTTGCGAGCTGCTTGAATGCGAGCCATATATTTGCGGCAATTGTATGGACCGGGTCATC
47	abf2	AAGCTTTGCTCGAAGAAACTATGATATCACAATTTGCAACATCGATCACCAAAACAAAGCAGAGGCGGAAATCGAGCTGTGTATGGACCGGGTCATC
48	abf2	AAGCTTTGCTCGAAGAAACTATGAGCGATGATTTTGACTGAGGGAGAGCGGATGCTTTTGACACCGACGTACCATGTATTGTATGGACCGGGTCATC
49	abfA	AAGCTTTGCTCGAAGAAACTATGTGAAGATGCCTTATTAGTCGGCTCTCTGCTCATTACGATGCTGCAGCACGCAGACTGTATGGACCGGGTCATC
50	abfA	AAGCTTTGCTCGAAGAAACTATGGGTAAACAAGGCTGAGGATCAGATGGAGACGGAGATTTCGCTCAGAGGCTTTGAATCTGTATGGACCGGGTCATC
51	abfA	AAGCTTTGCTCGAAGAAACTATGGGCATATACGAGCCTGATCACCCTGAAGCGGATGAAGATGGATTTAGAAAAGATGTCCATGTATGGACCGGGTCATC
52	abfA	AAGCTTTGCTCGAAGAAACTATGGCTTGACTTGGCATGGCAAACGACAGAAACCAATGAAGTGGGAACAAATGAATTTTTTGTATGGACCGGGTCATC
53	abfA	AAGCTTTGCTCGAAGAAACTATGGATTTCACTGATGTGCCATATGTTGATGCTGCTGTTGTGTACTCTGAAGAGGAAGAAACATGTATGGACCGGGTCATC
54	abfA	AAGCTTTGCTCGAAGAAACTATGGAAACTTTTTATCCGGATACAACTGGGAGGACGGTGTCGGACCAGTCGAAAACCGTGTATGGACCGGGTCATC
55	abfA	AAGCTTTGCTCGAAGAAACTATGGAAAACTATCAATCTCTCTCTGGATGAATGGAACGTCTGGTACCACTCAAATGAGGCTGATGTATGGACCGGGTCATC
56	abfA	AAGCTTTGCTCGAAGAAACTATGCGGAAACCGGGATAACAATCTGCCAAACTACTTGGCACGTTCTATGGATTTGGATCATTTTGTATGGACCGGGTCATC
57	abfA	AAGCTTTGCTCGAAGAAACTATGCGATTGGGAAGCGAAGGTGCTTGAGCATACGTATGAGCATGTCGACTATATCTCTCTTCATGTATGGACCGGGTCATC
58	abfA	AAGCTTTGCTCGAAGAAACTATGCCGCCCGTAATCTCGTTGAATATTGCAACCATCCGAAAGGCTCTTACTGGAGTGATTTAATGTATGGACCGGGTCATC
59	abfA	AAGCTTTGCTCGAAGAAACTATGCAAAAAAGGTGAACACTGAGGTCAATATGGCCGTCAACCTTGGCACAAGAGGCATAGTGTATGGACCGGGTCATC
60	abfA	AAGCTTTGCTCGAAGAAACTATGAGAGACAGCAAAGGTCATGAAGTGGGTTGACCCATCAATTGAACTCGTTGCCTGCTGTATGGACCGGGTCATC
61	abfA	AAGCTTTGCTCGAAGAAACTATGACATGCATGCTTCTGTTTACGGAAGGGGCGAGTCACTGAAACCGCTTATTTCTTCTCTGTATGGACCGGGTCATC
62	abfA	AAGCTTTGCTCGAAGAAACTATGAAAATTGCGTGTCTTGCACAGCTTGTTAATGTCATCGCGCCGATCATGACGGAAAAAGTGTATGGACCGGGTCATC
63	abh	AAGCTTTGCTCGAAGAAACTATGTTGTGAGAAAAGTAGATGAATTAGGCCGCATTGTCATGCCGATTGAGTTGAGACGGTGTATGGACCGGGTCATC
64	abh	AAGCTTTGCTCGAAGAAACTATGCTTGAAAAAGTACAAACCTCATGGCGTTTGTTTAATGACTGGAGAAATCACTTCAGAAAATGTATGGACCGGGTCATC
65	abh	AAGCTTTGCTCGAAGAAACTATGAAAGAATACGGCAACGGTAAAATTACGCTAAGCCCTGAGGGTGCACAGCTGCTTCTCTGTATGGACCGGGTCATC
66	abn2	AAGCTTTGCTCGAAGAAACTATGTTTTCATACTTGAAATGAATCCGAAAACGGGCTTCCCGCTTCCTGGACAGGGATATTGTATGGACCGGGTCATC
67	abn2	AAGCTTTGCTCGAAGAAACTATGTCACCAGGCCACAACTCCGCATACTATGATGAAAAAACCGGGCGTTCCTATTTAATCTTCTGTATGGACCGGGTCATC
68	abn2	AAGCTTTGCTCGAAGAAACTATGGTTTTTGGATCTCATCTCGCTTCAGCTAAATCGAATGACCTCATGCAATGGCAGCTGTATGGACCGGGTCATC
69	abn2	AAGCTTTGCTCGAAGAAACTATGGCAACCACAGCAGAATCGAAGGCCCGTATGTTCTCTACAATCCAGACACCCAATATGTATGGACCGGGTCATC
70	abn2	AAGCTTTGCTCGAAGAAACTATGGAGGAAAACCGGAAAAAACACCGCCGACATCACGTTAGCAGGCAAGAAGTATAACGTGTATGGACCGGGTCATC
71	abn2	AAGCTTTGCTCGAAGAAACTATGCTTGCAGCTCTTATCATGGCCTTCACCCTCCCAAACTCCGTCTATGCACAAAAACTGTATGGACCGGGTCATC
72	abn2	AAGCTTTGCTCGAAGAAACTATGCTTCCCGGGCAGGGGTGAAGAACACGAAGTCAGAGTCCACCAATTGTTCATGAACTGTATGGACCGGGTCATC
73	abn2	AAGCTTTGCTCGAAGAAACTATGCTGGCCGGTAGCAGCACCATATCGTTATGCGGGCGAAACATTGAAAGAAGTAAAACTGTATGGACCGGGTCATC
74	abn2	AAGCTTTGCTCGAAGAAACTATGCGCCAGTGGGATTCGGTGAGAGAGAAGAACGTCATGACGTTTAGTGTGCTGAATACTGTATGGACCGGGTCATC
75	abn2	AAGCTTTGCTCGAAGAAACTATGCCATCGAACCATACGGCGTCAAACTCATGGGCAGCTACACTTTTGAAACAGAAAATGTATGGACCGGGTCATC
76	abn2	AAGCTTTGCTCGAAGAAACTATGCAGGAACATACAAACTTATCCAGCACGGAAAAGACATCTCAGCCGACATCAAACAAACCATGTATGGACCGGGTCATC
77	abn2	AAGCTTTGCTCGAAGAAACTATGATGATGCAACCAAACATCCGAATGTCGTCGACCCGCATACCTTCTTTGATAAAGATGTATGGACCGGGTCATC
78	abn2	AAGCTTTGCTCGAAGAAACTATGACTTATACCTATCATATGGCGGTCTCGATGCAACAGGCGGCTACAACATCCGTGTGTGTATGGACCGGGTCATC
79	abn2	AAGCTTTGCTCGAAGAAACTATGAATTAAAAGAAACCTTCGAATGGGCGCAATCCGATACTCTTTGGGCGGCTGACGTTGTATGGACCGGGTCATC
80	abnA	AAGCTTTGCTCGAAGAAACTATGTTACTGAAGAACGGGGACTGCGGGTTTTGAAGTCTTCAGACGCTAAAAATTGGACCGTACTGTATGGACCGGGTCATC
81	abnA	AAGCTTTGCTCGAAGAAACTATGTGACGGGGTAAACAGTACGTACAAAATTGCTTACGGAAGATCCAAAAGCATTACAGGCCCTGTATGGACCGGGTCATC
82	abnA	AAGCTTTGCTCGAAGAAACTATGTATTCCGTTTCTTCTTTTGGAAGCAATACATCTGCCATTGGCCTGGCATCTTCAACAATGTATGGACCGGGTCATC
83	abnA	AAGCTTTGCTCGAAGAAACTATGTACAATGAAGCCTACAGGCTCGCTCTATTCGATTGCAGCTAGACCGAATAATGGAGGTGCTGTATGGACCGGGTCATC
84	abnA	AAGCTTTGCTCGAAGAAACTATGGTTTTGGGGTGCATCCAATGAGCTGCTTCATGACCCGACTATGATTAAAGAGGGGTGTATGGACCGGGTCATC
85	abnA	AAGCTTTGCTCGAAGAAACTATGGCAATGACCAATGGAAAGGACCTGGAGGCCAGGATATTGTGAACGGAAACATTCTTGTATGGACCGGGTCATC
86	abnA	AAGCTTTGCTCGAAGAAACTATGGAGGGCTTGGTGATCCGTTCGACAAGCTCAAATAATTATAACGCCATTGATCCGGTGTATGGACCGGGTCATC
87	abnA	AAGCTTTGCTCGAAGAAACTATGCTTAGAAGCTCCTACTCTTACGTATCAAAATGGATATTACTATTTAATGGTTTCATTTGATGTATGGACCGGGTCATC
88	abnA	AAGCTTTGCTCGAAGAAACTATGCTATGATGCCAATGACAACGGCATTCCAAAGCTTCTCATCAATGATTTGAATTGGAGCTGTATGGACCGGGTCATC
89	abnA	AAGCTTTGCTCGAAGAAACTATGATAAGGATGGCAACCCGTGGCTTGCATTCGGCTCGTTTTGGAGCGGCATTAAGCTTGTATGGACCGGGTCATC
90	abnA	AAGCTTTGCTCGAAGAAACTATGAATTATGGCCAAAACCAGTGGGCGCCGGACATCCAATACTATAACGGCAAGTACTGTGTATGGACCGGGTCATC
91	abnA	AAGCTTTGCTCGAAGAAACTATGAACATGGAAACGCTTCTTACACTTTTCGAGTGCAGCTCTGGCTGCAGGTTTGATATTCATGTATGGACCGGGTCATC
92	abrB	AAGCTTTGCTCGAAGAAACTATGGGACGTGTAGTTATTCCTATCGAACTGCGTCGTACTCTTGGAATCGCAGAAAAAGATGCTGTATGGACCGGGTCATC
93	abrB	AAGCTTTGCTCGAAGAAACTATGCATCCTTAAAAAATATAAACCAAACATGACTTGCCAAGTAACTGGTGAAGTTTCTGATGATGTATGGACCGGGTCATC
94	abrB	AAGCTTTGCTCGAAGAAACTATGACTTGCAGGCGGTAAATTGGTTCTTAGTAAAGAAGGCGCTGAGCAAATCATCAGCGAAATGTATGGACCGGGTCATC
95	accA	AAGCTTTGCTCGAAGAAACTATGTTATTGATACGAAGGGGGCATACCCTGGACGAGCAGCTGAAGAAAGAGGACAAAGTGTGTATGGACCGGGTCATC
96	accA	AAGCTTTGCTCGAAGAAACTATGTGCGGAAATCGAACGGCTCGAAGACCGTCTCGCTAAGCTTCAGGATGATATTTACTGTATGGACCGGGTCATC
97	accA	AAGCTTTGCTCGAAGAAACTATGTCTGGCGGACCGTCCGACAACTCTTGATTATATCGAACACCTGTTTACCGACTTTTTTGTGTATGGACCGGGTCATC
98	accA	AAGCTTTGCTCGAAGAAACTATGGTTCAGCAGCGTTATGAAAAATATAAAGCAATTGGCAAAGTCTCGGTTGAAGATCAATGTATGGACCGGGTCATC
99	accA	AAGCTTTGCTCGAAGAAACTATGGTTATTTCTCCGGAAGGTGCCGCGGCACTTTTATGGAAGGACTCCAGTCTTGCTATGTATGGACCGGGTCATC
100	accA	AAGCTTTGCTCGAAGAAACTATGGGCTCCAAGATTAGAATTTGAAAAACCGGTGATTGAACTGCAAACCAAAATCGCCGTGTATGGACCGGGTCATC
101	accA	AAGCTTTGCTCGAAGAAACTATGGCAGCAGAAACAATGAAAATCACTGCGCCGGATTTAAAAGAATTAGGTATTATAGATCATGTATGGACCGGGTCATC
102	accA	AAGCTTTGCTCGAAGAAACTATGGATGAAGCCATTGTCGGCGGGATTGCGAAGTTCCACGGCCTCCCTGTAACGGTAATTGTATGGACCGGGTCATC
103	accA	AAGCTTTGCTCGAAGAAACTATGGAAGGAAAACCTAGTCCGCAATTTTGGGATGCCGCATCCAGAAGGCTACAGAAAAGTGTATGGACCGGGTCATC
104	accA	AAGCTTTGCTCGAAGAAACTATGCTATTGCCAAAAACCTGTTTGAGATGGCCGGCCTTCGAGTGCCTGTTATCTGCATTGTATGGACCGGGTCATC
105	accA	AAGCTTTGCTCGAAGAAACTATGAGCGCACCATGATGTGAAGCTGCAGGCAAGCTATATGGACGAAACCCTTAAACAATTGTATGGACCGGGTCATC
106	accA	AAGCTTTGCTCGAAGAAACTATGAAGCGGCGGAGCCCTTGGTCTGGGTGTAGGCAATCACTTGCATATGCTGGAAAACTCTACTGTATGGACCGGGTCATC
107	accB	AAGCTTTGCTCGAAGAAACTATGTCAAAGAAATCCACGAGCTGATTAAAGCAATTGACGAGTCTACAATTGACGAATTCGTTGTATGGACCGGGTCATC
108	accB	AAGCTTTGCTCGAAGAAACTATGGGAAGCTGGCCCGTATGTAACAGCCGGTTCAAAAGTAAATGAAAACACAGTTGTCTGCATTGTATGGACCGGGTCATC
109	accB	AAGCTTTGCTCGAAGAAACTATGGAAAGGCGAAATCGTTGAAGTATTAGTAGAAAACGGCCAGCTGGTCGAATACGGACAACCTGTATGGACCGGGTCATC
110	accB	AAGCTTTGCTCGAAGAAACTATGCCTGCCCAAGAAGCACCAAAGCAAGATGAGAATCTGCATAAAATCACTTCACCAATGGTATGTATGGACCGGGTCATC
111	accB	AAGCTTTGCTCGAAGAAACTATGCAGCACCTGTACAAGCACAGGCTCCGCAGGCAGTTCAGCCGCAAGCGCAGCAAGCTGTATGGACCGGGTCATC
112	accB	AAGCTTTGCTCGAAGAAACTATGAGGTGTATCCTTAAAACTGAAAAAACACGAAGCAGGCACGGTTCAAGTCATGCAGCAGGTGTATGGACCGGGTCATC
113	accC	AAGCTTTGCTCGAAGAAACTATGTATTTAAACGTTACAAATATTGTGAGTGTTGCAAAGCTGACTGGCACGGACGCCATTCATGTATGGACCGGGTCATC
114	accC	AAGCTTTGCTCGAAGAAACTATGTAGGGTTGCCCGCACTGAAGAGGAACTGATTAATGGCATTAAGATTACACAGCAGGAAGCTGTATGGACCGGGTCATC
115	accC	AAGCTTTGCTCGAAGAAACTATGGCGGTAAAGGCTGCCAAAGCGGTTGGCTATACAGGTGCTGGAACAGTTGAATTTATCTATGTATGGACCGGGTCATC
116	accC	AAGCTTTGCTCGAAGAAACTATGGCATTTGGGAATCCAGGTGTATACATCGAAAAATACATAGAAGATTTTCGCCACGTTGAGTGTATGGACCGGGTCATC
117	accC	AAGCTTTGCTCGAAGAAACTATGCTTGCTAATGAAATTGGGTATCCTGTAATTATAAAAGCCACCGCAGGCGGAGGCGGATGTATGGACCGGGTCATC
118	accC	AAGCTTTGCTCGAAGAAACTATGCTGCGTACCCTGGCTATTCCATCCCACCGTACTATGACAGCATGATTGCAAAGGTATGTATGGACCGGGTCATC
119	accC	AAGCTTTGCTCGAAGAAACTATGCGAATTCGTCATCGAAGGCATTGAGACAACAATCCCTTTCCATTTAAAACTGCTTGAACATGTATGGACCGGGTCATC
120	accC	AAGCTTTGCTCGAAGAAACTATGCAGTCACAGAAATGGTGACGGGAACTGACCTGATCAAGGAACAAATCAAAGTGGCTTGTATGGACCGGGTCATC
121	accC	AAGCTTTGCTCGAAGAAACTATGATCCAAGTGCTTGCTGATAACTACGGAAATACGATCCATTTGGGCGAACGCGACTTGTATGGACCGGGTCATC
122	accC	AAGCTTTGCTCGAAGAAACTATGAGACGCCTGCAAAAGCTTTTGGAAGAATCACCATCTCCTGCCCTTGATTCAGAAATTGTATGGACCGGGTCATC
123	accC	AAGCTTTGCTCGAAGAAACTATGACTACAATGAACAGCGCTATTACTTCATGGAAATGAACACGAGAATCCAGGTGGAGCACCTGTATGGACCGGGTCATC
124	accC	AAGCTTTGCTCGAAGAAACTATGAATGGAACTGAGCCTCAAGCAAGAAGATGTTGAATTTGAAGGCTGGGCCATCGAATTGTATGGACCGGGTCATC
125	accC	AAGCTTTGCTCGAAGAAACTATGAATGCTGATTTCGCTGAATTATGTGAAGAAGTGAATGTCACGTTTGTCGGCCCGAGTGTATGGACCGGGTCATC
126	accC	AAGCTTTGCTCGAAGAAACTATGAAAAGCTATTGATCGCCAACAGAGGAGAAATTGCTGTCAGAATCATCAGAGCCTGCAGAGTGTATGGACCGGGTCATC
127	accD	AAGCTTTGCTCGAAGAAACTATGTGTTCAGTGAAGAACAGGGTCTTATTATTTCAGTAATGACGCATCCGACTACCGGGGGCTGTATGGACCGGGTCATC
128	accD	AAGCTTTGCTCGAAGAAACTATGTGTTAAAGGATATATTCACGAAAAAGAAAAAGTATGCTTCCGTACCGTCTGATCAAGCGATGTATGGACCGGGTCATC
129	accD	AAGCTTTGCTCGAAGAAACTATGTGCCTGAGGACTTCCAAACGGCTGAGTTTTTATTAAAACATGGACAGCTTGATGCGGTTATGTATGGACCGGGTCATC
130	accD	AAGCTTTGCTCGAAGAAACTATGTCGCGACGATATGAAAAAAACGTTAGAAAATCTGCTGGATATGCATCAAACAGGAGGTGATGTATGGACCGGGTCATC
131	accD	AAGCTTTGCTCGAAGAAACTATGTATCAGCAAGCTTTGCATCCCTTGGCGATTACAATTTCGCTGAGCCTGGCGCGCTTGTATGGACCGGGTCATC
132	accD	AAGCTTTGCTCGAAGAAACTATGGGTGCTAGAATGCAGGAAGGCGTATTAAGTTTGATGCAGATGGCAAAGACAAGCTCTGCTGTATGGACCGGGTCATC
133	accD	AAGCTTTGCTCGAAGAAACTATGGCACGATGTTCCGGAAGGCATTATGACAAAATGTCCTAAGTGTAAAAAAATCATGCTCACTGTATGGACCGGGTCATC
134	accD	AAGCTTTGCTCGAAGAAACTATGCTTGAAAAAGATCGCGAGAAAACATCCTTAAACGAGGCTGTTGTGACAGGCAAGGGTGTATGGACCGGGTCATC
135	accD	AAGCTTTGCTCGAAGAAACTATGATTTCCCAATGAACGCAAAACAGCGTATCGAAAGCTTGATGGATGAACAATCCTTTGATGTATGGACCGGGTCATC
136	accD	AAGCTTTGCTCGAAGAAACTATGATGGACTCTTCATTCAGAATGGGCAGCATGGGTTCAGTCGTCGGTGAAAAAATCACTGTATGGACCGGGTCATC
137	acdA	AAGCTTTGCTCGAAGAAACTATGTAAACTCGCGGATATGGCGACAATGATAGAAGCTTCAAGGCTACTGACCTATCAGGCTGCTGTATGGACCGGGTCATC
138	acdA	AAGCTTTGCTCGAAGAAACTATGGGCGTTGCTGATATTTACATTGTTTTTGCCGTCACCGATCCCGAGAAAAAGAAAAAAGGTGTATGGACCGGGTCATC
139	acdA	AAGCTTTGCTCGAAGAAACTATGGGCGGCTACGGCTATACAAAAGATTATCCGGTAGAACGCTATATGCGTGATGCAAAAATCTGTATGGACCGGGTCATC
140	acdA	AAGCTTTGCTCGAAGAAACTATGGCTTCAATATGCAAAAGAGCGAAAGCAATTCGGAAAATCGATCGCCGAGCAGCAGTGTATGGACCGGGTCATC
141	acdA	AAGCTTTGCTCGAAGAAACTATGGCATGAAAACAACTGCTGAACGAATCGGCGATGACTATGTGTTAAATGGTTCCAAAGTGTGTATGGACCGGGTCATC
142	acdA	AAGCTTTGCTCGAAGAAACTATGGCAAGAAAGAAAAGAAGCTGGGCATCCGTTCTTCACCGACAACGGAAATCATGTTTGTATGGACCGGGTCATC
143	acdA	AAGCTTTGCTCGAAGAAACTATGGAAAAGCTTCCGCCATGTCCAAACTGATGGCTGGGGATACGGCGATGAAGGTAACTGTATGGACCGGGTCATC
144	acdA	AAGCTTTGCTCGAAGAAACTATGCGATGAAGACGCTTGACGGAGGCAGAAACGGCATAGCTGCACAAGCTGTAGGCATTGTATGGACCGGGTCATC
145	acdA	AAGCTTTGCTCGAAGAAACTATGCAGAAGAACATGAGATGATACGAAAATTGGTGCGCGATTTTGCGAAGCATGAGGTTGTATGGACCGGGTCATC
146	acdA	AAGCTTTGCTCGAAGAAACTATGATTACGGCGGAATTGGAAGTGACTATTTAGCCTACGTCATCGCGGTGGAAGAGCTGTTGTATGGACCGGGTCATC
147	acdA	AAGCTTTGCTCGAAGAAACTATGATATCTCTCTTTGCAGCTGGCCGCTGTTTGCCTTTGGGACAGAGGAACAGAAGACTGTATGGACCGGGTCATC
148	acdA	AAGCTTTGCTCGAAGAAACTATGACTTAACACAGCTGGCTCTCGGAGAGAAAATCGGCGCATTCGCTTTGACCGAAGCTGTATGGACCGGGTCATC
149	acdA	AAGCTTTGCTCGAAGAAACTATGACGCAAATCTATGAAGGCACTCAAGAAATTCAAAGACTGGTCATCTCCAGAATGCTCGCTGTATGGACCGGGTCATC
150	acdA	AAGCTTTGCTCGAAGAAACTATGAACGGGACGAACAAGAACGCTTCGATCGCGAGCTGTTTCGGGAAATGGCAAATCTTGTATGGACCGGGTCATC
151	ackA	AAGCTTTGCTCGAAGAAACTATGTTCAGAAACCGTTTTAACGAAGGGTTTAGTTGAACGAATCGGTATCGCCGACAGCGTTGTATGGACCGGGTCATC
152	ackA	AAGCTTTGCTCGAAGAAACTATGGTATACTGGGACCCTGCGCTTAATAACGTGCGCGGCGAGGAAGCTTTCATCAGCTATTGTATGGACCGGGTCATC
153	ackA	AAGCTTTGCTCGAAGAAACTATGGGTATCGGTGAAAACAGTGTGGAAGTCAGAGAACGCGTTCTTCGCGGTTTAGAATTCATTGTATGGACCGGGTCATC
154	ackA	AAGCTTTGCTCGAAGAAACTATGGGCATTTCCGGTTTCTCAAGCGATCTTCGTGACATCGTTGAAGCTACGAAAGAAGTGTATGGACCGGGTCATC
155	ackA	AAGCTTTGCTCGAAGAAACTATGGCAAGCAGAATCCACAAATACATCGGTTCTTACGCTGCAAGAATGAGCGGTGTAGATGTGTATGGACCGGGTCATC
156	ackA	AAGCTTTGCTCGAAGAAACTATGGATATTCCAGATCATGCGGTAGCTGTTAAAATGCTGCTGAATAAGTTAACGGAATTCGGCTGTATGGACCGGGTCATC
157	ackA	AAGCTTTGCTCGAAGAAACTATGCTTCACATAAATATGTAACTGAGCGTGCGGCAGAGCTTCTCGGCCGTCCGTTAAAAGTGTATGGACCGGGTCATC
158	ackA	AAGCTTTGCTCGAAGAAACTATGCCATTAAGGAAATCGAAGATATTTCTGAATTGGCACCGCTTCACAATCCGGCAAATATCGTGTATGGACCGGGTCATC
159	ackA	AAGCTTTGCTCGAAGAAACTATGCCAAAATTATTGCAATTAACGCAGGAAGCTCGTCTTTGAAATTTCAGCTTTTCGAAATGCTGTATGGACCGGGTCATC
160	ackA	AAGCTTTGCTCGAAGAAACTATGATTATTAAAGACTTGAATGAAATTGACGGAATTGGCCATCGTGTCGTTCACGGCGGTGTATGGACCGGGTCATC
161	ackA	AAGCTTTGCTCGAAGAAACTATGATCCCGACTGATGAAGAAGTCATGATTGCGCGCGACGTTGTTCGTTTAGCAAAATATGTATGGACCGGGTCATC
162	ackA	AAGCTTTGCTCGAAGAAACTATGACCTTGGAAACGGAGCAAGTATTGCCGCTGTTGAAGGCGGAAAATCTATTGACACTGTATGGACCGGGTCATC
163	ackA	AAGCTTTGCTCGAAGAAACTATGACAGCATTCCACCAAACAATGCCTGAGCAGTCTTACCTTTACAGCTTGCCGTATGAATGTATGGACCGGGTCATC
164	ackA	AAGCTTTGCTCGAAGAAACTATGACACGCTCTGGAAACATCGACCCTGCCCTGATCCCATACATCATGGAGAAAACAGTGTATGGACCGGGTCATC
165	acoA	AAGCTTTGCTCGAAGAAACTATGTGACGGCAAAGATATTTTAGCAGTTTACCAGGCAGCCGAGGAAGCGATAGAAAGAGCAATGTATGGACCGGGTCATC
166	acoA	AAGCTTTGCTCGAAGAAACTATGTATTTGTTGCTGAAAACAACGGCTATGGCGAAGCTACCCCATTTGAGTACGCATCATGTATGGACCGGGTCATC
167	acoA	AAGCTTTGCTCGAAGAAACTATGTACGGCCATTTCGAAGGAGATGCCCAAACCTATAAAACGAAGGATGAAAGAGTTGAGCATGTATGGACCGGGTCATC
168	acoA	AAGCTTTGCTCGAAGAAACTATGGTTCAGCGAAGACAGCCCATATCCAAAAGATTCGGAGCTGCTGACAGATGTGTATGTGTATGGACCGGGTCATC
169	acoA	AAGCTTTGCTCGAAGAAACTATGGGTTCTATGCACATTGCGGATCTTGATAAAGGCATGTTAGGCGCAAATGGAATCGTTGTATGGACCGGGTCATC
170	acoA	AAGCTTTGCTCGAAGAAACTATGGGATGTACCAAAAGATGCTGGAGATCAGGGGCTTTGAAGACAAAGTGCATGAACTGTTCTGTATGGACCGGGTCATC
171	acoA	AAGCTTTGCTCGAAGAAACTATGGAGTGCTTCCCGGATTCGTTCATTTATATGCCGGTGAGGAAGCCGTGGCTGTAGGTGTATGGACCGGGTCATC
172	acoA	AAGCTTTGCTCGAAGAAACTATGGACGGGGCAAATAACCAAGGTACCTTCCACGAAGGGCTGAATTTAGCGGCTGTATTGTATGGACCGGGTCATC
173	acoA	AAGCTTTGCTCGAAGAAACTATGCGGCTTTACGCTCGCATGCGGATCAGCGCTCACGGCTAAATATAAACAGACTAAAAATTGTATGGACCGGGTCATC
174	acoA	AAGCTTTGCTCGAAGAAACTATGATTTACATGATGGCGACAGCATTACAAGCACCCACAGGGGACATGGACATTGTATCTGTATGGACCGGGTCATC
175	acoA	AAGCTTTGCTCGAAGAAACTATGAGGCTGTGACCTGGACGGCATGATGGCGGAAATTTTCGGGAAAGCGACCGGATTGTTGTATGGACCGGGTCATC
176	acoA	AAGCTTTGCTCGAAGAAACTATGACAGATGCTAATAAGCTGTCAGACATTGAACAGCGTGTCAGCGAATCGATTGAAAAAGCCTGTATGGACCGGGTCATC
177	acoB	AAGCTTTGCTCGAAGAAACTATGTATTAGGGGTCACAAAGGGACTCGTACAGGAATTCGGGCGTACAAGAGTGCTGGATGTATGGACCGGGTCATC
178	acoB	AAGCTTTGCTCGAAGAAACTATGTACACCGGTTCCGTTTTCACCAGTGCTTGAAGATCAATATTTGCCGACACCAGATTGTATGGACCGGGTCATC
179	acoB	AAGCTTTGCTCGAAGAAACTATGGTTACGCTCTTTGCAGTCGGCAAGCAGGTCAATACTGCGCTTGAAGCGGCTGCACTGTATGGACCGGGTCATC
180	acoB	AAGCTTTGCTCGAAGAAACTATGGATGCAGCATTGCCACGGATATTGCTGCGCTTGTCGCTGACAAGGGCTTTGATTTTGTATGGACCGGGTCATC
181	acoB	AAGCTTTGCTCGAAGAAACTATGCCGGAAGATTATTATACAATTCCCCTCGGAAAAGCGGATATCAAACGCGAAGGCAATGATTGTATGGACCGGGTCATC
182	acoB	AAGCTTTGCTCGAAGAAACTATGCCCGCAGTCTGTCTCCTCTGGATGAGGATGCGATTTTCACATCGTTAGAAAAAACATGTATGGACCGGGTCATC
183	acoB	AAGCTTTGCTCGAAGAAACTATGCCAATCCGTATGATGCCAAAGGTCTTTTGCTTGCAGCAATAGAAGATAATGATCCGGTGTGTATGGACCGGGTCATC
184	acoB	AAGCTTTGCTCGAAGAAACTATGATTTCTGAGGCAGGCTATATGGGAGCGGCTATGGCTGCGGCATCAACCGGTTTGAGTGTATGGACCGGGTCATC
185	acoB	AAGCTTTGCTCGAAGAAACTATGATTGCCGAGCTGATGTTTAACGATTTTATCGGCACGTGCTTTGATCAGGTGATCATGTATGGACCGGGTCATC
186	acoB	AAGCTTTGCTCGAAGAAACTATGATTCACAATCGCTGTATGGCCTTTTCACGAGCATCCCTGGACTGAAGACAGTTGTTGTATGGACCGGGTCATC
187	acoB	AAGCTTTGCTCGAAGAAACTATGAAGCTTGCGATGAGAAAAGACGAAAATGTGCTTTTGATCGGTGAGGATGTCGCCGTGTATGGACCGGGTCATC
188	acoB	AAGCTTTGCTCGAAGAAACTATGAAATTCCGTTATATGTTCGGCGGAAAAGCGCAAGTGCCGATTACCGTCCGCACCACATACTGTATGGACCGGGTCATC
189	acoC	AAGCTTTGCTCGAAGAAACTATGTTGAAATGGAGATCGAAGCGCCTGAAAAAGGAACGCTGATCGATATCAAAGTGAAAGATGTATGGACCGGGTCATC
190	acoC	AAGCTTTGCTCGAAGAAACTATGTGAAAAGCTATCGCTGATTGAACTGGCTCAATCCATCTCAGAAAATGCCAAAAAAGCATGTATGGACCGGGTCATC
191	acoC	AAGCTTTGCTCGAAGAAACTATGGGATTAGACCTAAAACAACTGAAAGGAACTGGACCAGGCGGACGAATCGTGAAGGATGTGTATGGACCGGGTCATC
192	acoC	AAGCTTTGCTCGAAGAAACTATGGCGGTAAAAGTAGTGATGCCAAAATTGGGAATGGCCATGAAACAAGGGGAAGTATCGATTGTATGGACCGGGTCATC
193	acoC	AAGCTTTGCTCGAAGAAACTATGGCAGGAAAGCCTGGCAAACAGCGCGCAGCTGACGATCACGATGAAAGCTGATATCTGTATGGACCGGGTCATC
194	acoC	AAGCTTTGCTCGAAGAAACTATGGAGAAGAGGTTCCGCCCGGCACAGCTATCTGCTATATCGGGGACGCCAATGAGTCTGTATGGACCGGGTCATC
195	acoC	AAGCTTTGCTCGAAGAAACTATGCCGCTGCATTCCTGAAGGCGATGAAAACATATTTGGAAGAACCCGCAGCATTAATTTTATTGTATGGACCGGGTCATC
196	acoC	AAGCTTTGCTCGAAGAAACTATGCATCGGAGCAAGCTATGACACACCGGTGTATCAAGGGGAGGAGATCGTCAGAAGCTGTATGGACCGGGTCATC
197	acoC	AAGCTTTGCTCGAAGAAACTATGATGTGCACCTTGGTATGGCTGTAGCCTTGGAAAATGGCTTAGTGGTGCCTGTCATTGTATGGACCGGGTCATC
198	acoC	AAGCTTTGCTCGAAGAAACTATGATAAAAAAGTAGGCGACCCGGTTGAAAAGGGAGAAAGCATTGCCAGCATTCAATCGTGTATGGACCGGGTCATC
199	acoC	AAGCTTTGCTCGAAGAAACTATGAGATCAAGCAAAGCCTGTTTCGGAGCAGAAAGCGCAGGAAATCCCGGTGACAGGCTGTATGGACCGGGTCATC
200	acoC	AAGCTTTGCTCGAAGAAACTATGACGTGCGGGAAGCGAAGAACTGCAAGGATCTACTTTCTCCATTACAAACCTTGGCTGTATGGACCGGGTCATC
201	acoC	AAGCTTTGCTCGAAGAAACTATGACAAACCCGCAGCCTCCAAAAAAGATCGAATGAAAATATCTCCAGTCGCCAGGAAAATATGTATGGACCGGGTCATC
202	acoC	AAGCTTTGCTCGAAGAAACTATGAACAGCTTTCACCAACTGCGGAAGAGAGATACGGCACAAAACTGACGATCACTCATGTATGGACCGGGTCATC
203	acoL	AAGCTTTGCTCGAAGAAACTATGTGTAAAGGGAACAGCCTCCTTTCTTTCTGAAAGAAAGCTCTTGATCGAAGGAGAAAACGGTGTATGGACCGGGTCATC
204	acoL	AAGCTTTGCTCGAAGAAACTATGGTGAGTATGCAGGGCTGTTCGCCAGATTGGGATCGCAGGTGACCATCATTGAAACTGTATGGACCGGGTCATC
205	acoL	AAGCTTTGCTCGAAGAAACTATGGCTCATTAAACAGCAAGCGGAAGGAAAGGTCAAAATCATGGCTGAACCGGAATTCTGTATGGACCGGGTCATC
206	acoL	AAGCTTTGCTCGAAGAAACTATGGCCGAAAACAACAGGTTGTCAGTCAGCTTGTCCAAGGCGTTCAGTACCTAATGAAGAAAATGTATGGACCGGGTCATC
207	acoL	AAGCTTTGCTCGAAGAAACTATGGCAGCTGGAACAGGCCGGAGTTGATTTTTCTCCAAAGGGCATTCCGGTGAATGGGTGTATGGACCGGGTCATC
208	acoL	AAGCTTTGCTCGAAGAAACTATGGAGAAACTTGAGGAAGACGGTGTCGAAGTGCATACTTCATCCAGATTAGGGCGGGTGTATGGACCGGGTCATC
209	acoL	AAGCTTTGCTCGAAGAAACTATGCTTCCGGAAGGGATGTCAAAATCAATGAGAAACATGTGCCGCGCTGCATCTATACTGTATGGACCGGGTCATC
210	acoL	AAGCTTTGCTCGAAGAAACTATGCAGCGAGAGTTTAAAACGAAGGCCGATTATGTGCTGGTGGCGATCGGCAGAAAACTGTATGGACCGGGTCATC
211	acoL	AAGCTTTGCTCGAAGAAACTATGCAGAACGACAGGCAAGAAGCATATACGGGGATGTGAAGATCGGCGAATTTTCATTTTTGTATGGACCGGGTCATC
212	acoL	AAGCTTTGCTCGAAGAAACTATGATTTTATCGCCGCCCATCCGACTTTATCGGAAACATTGCATGAGGCGCTGTTAAGTGTATGGACCGGGTCATC
213	acoL	AAGCTTTGCTCGAAGAAACTATGAGACGAACGTGCCTCATATTTACGCGTGCGGAGATGCTATAGGGGGCATTCAGCTTGTATGGACCGGGTCATC
214	acoL	AAGCTTTGCTCGAAGAAACTATGACAGCTTTGGAATCGAACTTCCGGCAGGTGCGATATCAGTCGATTGGAGTAAAATGTGTATGGACCGGGTCATC
215	acoL	AAGCTTTGCTCGAAGAAACTATGACAGCAAAGACGCGCTTTCTCTTTCCGAGATTCCGTCTTCACTAGTCATTGTCGGTGTATGGACCGGGTCATC
216	acoL	AAGCTTTGCTCGAAGAAACTATGAAAAGAAATCAGAGAGGCGGACCAAGTATTGATTGCCTCCGGGTCAGAGCCAATCTGTATGGACCGGGTCATC
217	acoR	AAGCTTTGCTCGAAGAAACTATGTAAAAGAAATGGAAATGATGGCGCTGTTAATTGATTCAGACGGTGTTGTTCTGGCATTGGTGTATGGACCGGGTCATC
218	acoR	AAGCTTTGCTCGAAGAAACTATGGTTTTACCGTCTTCATGTCTATCCAATTGAACTCCCTCCATTACGCGATCGCACCGTGTATGGACCGGGTCATC
219	acoR	AAGCTTTGCTCGAAGAAACTATGGATTGCCTATGCCGCTGAACGGGAACTCGCAGCTAAAAGCCGTGAGAAAGAGCTGTGTATGGACCGGGTCATC
220	acoR	AAGCTTTGCTCGAAGAAACTATGGAAGTGGCCGGGGAATATCCGCGAGCTGTTTAATGTGTTTGAACGTCTTTCTATCAGATTTGTATGGACCGGGTCATC
221	acoR	AAGCTTTGCTCGAAGAAACTATGGAAAGAAATTCCGGTTGATATCAGAGTTATTGCCGCCACACATTGTGATTTACGCGAGCTGTATGGACCGGGTCATC
222	acoR	AAGCTTTGCTCGAAGAAACTATGCTCTGTAATACCAAGCAGCACATCATCAGTGCGAGCATGCCGATTCGAACCTCAATTGTATGGACCGGGTCATC
223	acoR	AAGCTTTGCTCGAAGAAACTATGCAGCTGCTCCGATTCACCATGAGGATGGCAGCCTTGCGGGTGTAATTGACATATCTGTATGGACCGGGTCATC
224	acoR	AAGCTTTGCTCGAAGAAACTATGATTTCCCACTCGATGCAGGTTGCACTTTTACGGGTGCTTCAGGAACGCAAGATAACTGTATGGACCGGGTCATC
225	acoR	AAGCTTTGCTCGAAGAAACTATGATTAAGAAAACGGATTGCAGAGTCATGGCATCGCTGCAAAAAAGCTGAGGTCAATCCTTATGTATGGACCGGGTCATC
226	acoR	AAGCTTTGCTCGAAGAAACTATGAGGGCCGGCACCTGTACGAGTTGAAGGAACGGGGCTATTCAATCGAAAATGCTGTTGTATGGACCGGGTCATC
227	acoR	AAGCTTTGCTCGAAGAAACTATGAGGCCCGAAGGTTTTACAGCAAACGGAGCTGGATCAGCAGTCAAAAAAACATTCATTGTATGGACCGGGTCATC
228	acoR	AAGCTTTGCTCGAAGAAACTATGACATCAGCGAGCCGGTTGCAATACAAGGATCAGAGCATTACTCTATCGCTTCCCATTGTATGGACCGGGTCATC
229	acoR	AAGCTTTGCTCGAAGAAACTATGAACTGTTCGGATATGCAGAGGGCGCTTTTACGGGAGCGAAACGAAATGGCTATAATGTATGGACCGGGTCATC
230	acoR	AAGCTTTGCTCGAAGAAACTATGAAAATCAGCGGGATCCCCCGAAGCACTTTCTACAAACGCCTGAAAAAATTCAACTTGTTGTATGGACCGGGTCATC
231	acpA	AAGCTTTGCTCGAAGAAACTATGGGAAGACTTAGGTGCTGATTCCCTAGATGTAGTTGAGCTTGTTATGGAACTTGAAGACGATGTATGGACCGGGTCATC
232	acpA	AAGCTTTGCTCGAAGAAACTATGGATGCTGAAAAGATTGCAACAGTCGGCGACGCTGTGAACTACATACAAAACCAGCTGTATGGACCGGGTCATC
233	acpA	AAGCTTTGCTCGAAGAAACTATGAACGAAAATCATCGTAGATCGCCTTGGCGTTGATGAAGCAGACGTCAAACTTGAAGTGTATGGACCGGGTCATC
234	acpK	AAGCTTTGCTCGAAGAAACTATGCGATGGTGCTAGAGGATTTATCGTTAAAAATCCCTCGCATTGAGCTATCCGGGGTGATGTATGGACCGGGTCATC
235	acpK	AAGCTTTGCTCGAAGAAACTATGCCTGAATTAGACGGACACAGATTTGAGCCTGAAGATCAGTTAGTTGAGCTAGGAGCTGACTGTATGGACCGGGTCATC
236	acpS	AAGCTTTGCTCGAAGAAACTATGTAGGAAAGACCAAAATGGCAAGCCCTATATCATTTGTACGAAACTGAGCCAGGCCGCTGTATGGACCGGGTCATC
237	acpS	AAGCTTTGCTCGAAGAAACTATGGAAAAGGTTTGCCGAGCGGATTTTGACGCGAAGCGAGCTTGACCAATACTATGAGTGTATGGACCGGGTCATC
238	acpS	AAGCTTTGCTCGAAGAAACTATGCACGTATCGATCACTCATACAAAAGAATACGCTGCCGCGCAGGTTGTGATTGAAAGTGTATGGACCGGGTCATC
239	acpS	AAGCTTTGCTCGAAGAAACTATGATGATTTACGGCATTGGGCTGGACATTACCGAGCTTAAACGGATCGCCTCTATGGTGTATGGACCGGGTCATC
240	acpS	AAGCTTTGCTCGAAGAAACTATGAAAAGAAGCGTTCTCGAAAGCATTTGGCACCGGCATTGGGAGGCAGCTCAGCTTTTGTATGGACCGGGTCATC
241	acsA	AAGCTTTGCTCGAAGAAACTATGTTTTTAACAAACGAATCCATGATACCTGGTGGATGACCGAAACGGGCAGTCAGCTTGTATGGACCGGGTCATC
242	acsA	AAGCTTTGCTCGAAGAAACTATGTTTTATGCCGAGATCACCCGAGCTTTATTTTATTATGCTTGGCGCAATCAAAATTGGCGTGTATGGACCGGGTCATC
243	acsA	AAGCTTTGCTCGAAGAAACTATGTTGGAATAACCCTGAAAAGTATGAATCGTATTTCATGCCGGGCGGCTGGTATGTGTCTGTATGGACCGGGTCATC
244	acsA	AAGCTTTGCTCGAAGAAACTATGTATCCTTGCATGGATATTAAACCGGGTTCAATGGGTAAGCCGATTCCAGGAGTGGATGTATGGACCGGGTCATC
245	acsA	AAGCTTTGCTCGAAGAAACTATGTAAAAAAGACGGCTTTCTGCTTCACTATACATCAGGTTCCACTGGTACGCCAAAGGGCGTTGTATGGACCGGGTCATC
246	acsA	AAGCTTTGCTCGAAGAAACTATGGGGATACTTTTGGTTCCAAGGCAGAGTTGATGACGTCATCATGACCTCCGGTGAGTGTATGGACCGGGTCATC
247	acsA	AAGCTTTGCTCGAAGAAACTATGGCAAAGGTTGTTGTCACAACGCCTGAGCTGCTGGAGAGAATACCGGTAGACAAACTTGTATGGACCGGGTCATC
248	acsA	AAGCTTTGCTCGAAGAAACTATGGAAGAATCAAACAGAGCCGGGAATGTGCTGAGACGGTATGGAAATGTGGAAAAAGGTGTATGGACCGGGTCATC
249	acsA	AAGCTTTGCTCGAAGAAACTATGCTCAGGGAAGGATTTGAGCCGTCTGATAAACTGAAAGAAGAGATCCGCCTATTTGTTGTATGGACCGGGTCATC
250	acsA	AAGCTTTGCTCGAAGAAACTATGCGAAATATGATCTAACTTCACTCCGGCATGTGCTCAGTGTCGGTGAGCCGCTAAATTGTATGGACCGGGTCATC
251	acsA	AAGCTTTGCTCGAAGAAACTATGATGTCTTCGTAGTCGGGGGAGAGGCTGAGAGCGGCACGAATATCATCAATTATGATGTATGGACCGGGTCATC
252	acsA	AAGCTTTGCTCGAAGAAACTATGAGAAGACATTTATTGGTGCACGGCTGATCCAGGCTGGGTGACAGGTACGGTATACTGTATGGACCGGGTCATC
253	acsA	AAGCTTTGCTCGAAGAAACTATGAGAAACATTTCTCTTGGCATGAGACAGGGAAACTGAATGCGGCGTATGAAGCGATTGTATGGACCGGGTCATC
254	acsA	AAGCTTTGCTCGAAGAAACTATGACAATCAAGGCAACGAGCTACCGCCGTACCGAATGGGCAATCTCGCCATCAAAAAGTGTATGGACCGGGTCATC
255	acuA	AAGCTTTGCTCGAAGAAACTATGGCGCATTATTATTGCCAGAGACGGCCGAACCATTGTCGGCTATGTCACGTATTTATGTATGGACCGGGTCATC
256	acuA	AAGCTTTGCTCGAAGAAACTATGCATTCAGCAAACATCAAAACAGCAACCGGCTCTTTACTGATAGAAGGGCCTGTCTCTCCTGTATGGACCGGGTCATC
257	acuA	AAGCTTTGCTCGAAGAAACTATGCAGCATGATGGATGAACAAATGGAAAACTACATTGTGATGACGACAGAATATTACTGGCATGTATGGACCGGGTCATC
258	acuA	AAGCTTTGCTCGAAGAAACTATGATGGTCTGAAGGAAATATGGAGGATTTGATTGAGCTCGGAGCCATCGAAGTAGCGCTGTATGGACCGGGTCATC
259	acuA	AAGCTTTGCTCGAAGAAACTATGAGGTTATGAGTTTCATAAAGATTTAACCGCATTTCGCCCGCCTCGCGAGCAGCATTGTATGGACCGGGTCATC
260	acuA	AAGCTTTGCTCGAAGAAACTATGACTGTCTGATGGCCCGCATTGGAAAAAACGTCAGCCAAGAATCAATTGAGCAATTTGTATGGACCGGGTCATC
261	acuA	AAGCTTTGCTCGAAGAAACTATGAAAGATGTGTGGGAATACAGAAAGATCATGGAAAAGATGATGAATGCAGGCGGATTGGTCTGTATGGACCGGGTCATC
262	acuC	AAGCTTTGCTCGAAGAAACTATGTGCCCAAACTGTCAGCAAAGCATTATATGCGATACGTTCTGAACAGCAAAGAACAAATGTATGGACCGGGTCATC
263	acuC	AAGCTTTGCTCGAAGAAACTATGGCAGCGGGTTCTGTTAACATATGATTTGCTTAAGACGATCAATGCCTTTGATGATGGAGATGTATGGACCGGGTCATC
264	acuC	AAGCTTTGCTCGAAGAAACTATGGATGATTCTTTTCTTGAGGCTTACCGGACAGCAGCTTCAGAAGTCGCCGCGTATTTGTATGGACCGGGTCATC
265	acuC	AAGCTTTGCTCGAAGAAACTATGGAGCGATCCGGCTGATTTATATCCTCCGATTCCCCGCAAGCCTGAAATTACAGAATGTATGGACCGGGTCATC
266	acuC	AAGCTTTGCTCGAAGAAACTATGGACAGTGTATTTATCTATTCTCCATCCTACCAAACCTATATGTTTCATCAGGAGCATCCCTGTATGGACCGGGTCATC
267	acuC	AAGCTTTGCTCGAAGAAACTATGCGCGGGAGAGCATCAGGATTCTGCATATACAACGACAGCGCTGTGGCTATTCAATATATTGTATGGACCGGGTCATC
268	acuC	AAGCTTTGCTCGAAGAAACTATGCCCACCACGGGGACGGTGTGCAATTTACATTTTACGATAATCCTGACGTATGCACTGTATGGACCGGGTCATC
269	acuC	AAGCTTTGCTCGAAGAAACTATGCAGGAAGGTATTTATTCCCTGGAACCGGTCAGATCCAAGAAAAAGGAAGCGGAAAAGGATGTATGGACCGGGTCATC
270	acuC	AAGCTTTGCTCGAAGAAACTATGCAGACTCGCTTCAGAAGAGGAGCTTTCCCTTGTCCACACGGACGATTACATTCAGTGTATGGACCGGGTCATC
271	acuC	AAGCTTTGCTCGAAGAAACTATGATTATCAGCCAAAACGGCGCCGATGCCCATTACTACGACCCGCTGACGCATTTATTGTATGGACCGGGTCATC
272	acuC	AAGCTTTGCTCGAAGAAACTATGATCACTCTTGGTCGGCGGCACTTTAACGGCCGCAGACTGGGTCATGTCAGGACAAGTGTATGGACCGGGTCATC
273	acuC	AAGCTTTGCTCGAAGAAACTATGAGGGAATTGACCCGGGTCACGAGATCCCGCCGGAATGGATTGTTAAATGGCAAAAACTGTATGGACCGGGTCATC
274	acuC	AAGCTTTGCTCGAAGAAACTATGAGGCGGCGGATATGATATTTGGCGTGTCGTGCCCCGCGCCTGGGCCAGAATATGGTGTATGGACCGGGTCATC
275	acuC	AAGCTTTGCTCGAAGAAACTATGAATATATACGAAGAAATCCCCCGTCTTGCACACACTTTGGCTCATCAATATTGCGGAGGGTGTATGGACCGGGTCATC
276	adaA	AAGCTTTGCTCGAAGAAACTATGTGCCTGATAGCGAGTGGGTTGATTTAATTACTGAATACATTGATAAAAATTTCACAGAAATGTATGGACCGGGTCATC
277	adaA	AAGCTTTGCTCGAAGAAACTATGTGCCGGATAGTATCAATAACGGACATAAAGAGAGCCATGATCATAGAATTTCGAATGATGTGTATGGACCGGGTCATC
278	adaA	AAGCTTTGCTCGAAGAAACTATGGTATCTTTCCAAACACAGAACAAGCTCTCCGCGCAAATTTTCGCCCTTGTAAACGTTGTGTATGGACCGGGTCATC
279	adaA	AAGCTTTGCTCGAAGAAACTATGCGCTGTTAAATCGACAGGGATATTCTGTAAACCATCCTGTAAATCTCGCGTTCCGAAAAATGTATGGACCGGGTCATC
280	adaA	AAGCTTTGCTCGAAGAAACTATGCAGATGAAAAGTGGCAAGCAATTATAAATAATGATGCAGCGTACAATAATCAATTTTTCTTGTATGGACCGGGTCATC
281	adaA	AAGCTTTGCTCGAAGAAACTATGAGAGTACACGCGGCTAAAAAGTATTTGATTCAGACAAATAAAGCGATTGGAGATATCGCTTGTATGGACCGGGTCATC
282	adaA	AAGCTTTGCTCGAAGAAACTATGACTGGACAGACACCAGCACGATTTCGTCAAATGAGTAAAATGGAGGAAACGTACAATGGATGTATGGACCGGGTCATC
283	adaA	AAGCTTTGCTCGAAGAAACTATGACGCTAGAATCGTTAGCAGATATTTGTCATGGGAGTCCGTATCATATGCATCGAACATGTATGGACCGGGTCATC
284	adaB	AAGCTTTGCTCGAAGAAACTATGTTATATTGCTTCAACTTTAAAGGGGCTTGTGTTTGTAGGTTCACAGAACAAACCAATCGATGTATGGACCGGGTCATC
285	adaB	AAGCTTTGCTCGAAGAAACTATGTGTTCGTGCTGTAGGTGCGGCTATTGGGGCTAATCCGGTATTAATTACTGTACCGTGCTGTATGGACCGGGTCATC
286	adaB	AAGCTTTGCTCGAAGAAACTATGTGTTCGAATGGGCTAGGAAACGCTTTCCGGGAAGTCTTCTTGTTGAAGATGATGATGTATGGACCGGGTCATC
287	adaB	AAGCTTTGCTCGAAGAAACTATGTGCACTTTGTGAAATTCCTTATGGACAGACGAAATCCTATTCCGACATTGCAAATGATGTATGGACCGGGTCATC
288	adaB	AAGCTTTGCTCGAAGAAACTATGTAGGAAAGAATGGCTCATTAACTGGCTATCGGGGCGGATTTGAAATGAAGACACTGCTCTGTATGGACCGGGTCATC
289	adaB	AAGCTTTGCTCGAAGAAACTATGCGGAAAAACTTTACTGTTCCAGTTGAGTACGCCGGTACGCAATTTCAGCTAGCCGTCTGTGTATGGACCGGGTCATC
290	addA	AAGCTTTGCTCGAAGAAACTATGTCTAAATACAAACGGTTTACAGAGAGCGGAGAAGGCACGGGGCGGAAAATCGATTTTGTATGGACCGGGTCATC
291	addA	AAGCTTTGCTCGAAGAAACTATGTCGTCACAAGCGGTCCGGAGGAGACTGGTAACCTGTTTATGGTAGGAGATGTCAATGTATGGACCGGGTCATC
292	addA	AAGCTTTGCTCGAAGAAACTATGGTACTATGAGGCGATGAAAGACTACCTGGCTGCTGGTGACCGGAGCGATGAGCTTTATTGTATGGACCGGGTCATC
293	addA	AAGCTTTGCTCGAAGAAACTATGGGAACAGTTTCATGAGGTGCTCGTTGACGAATATCAGGATACCAACCTCGTGCAGTGTATGGACCGGGTCATC
294	addA	AAGCTTTGCTCGAAGAAACTATGCTTAATGACGATCCACAGCAGCAAAGGGCTCGAATTTCCAGTCGTGTTTGTAGCAGTGTATGGACCGGGTCATC
295	addA	AAGCTTTGCTCGAAGAAACTATGCTGGACCTACCCGCATCAAGAAGTGACGCAAATTCGGACAAAGCAATCAGTTTCTTGTATGGACCGGGTCATC
296	addA	AAGCTTTGCTCGAAGAAACTATGCCTGATGCACACGAGGCAGATGAGCCGCTTTTAGTGCAGGGTATTATTGACTGTCTCTATTGTATGGACCGGGTCATC
297	addA	AAGCTTTGCTCGAAGAAACTATGCAGGACGATTTCAGTGAACTATATAAGCGGGTGCCCGCCGTCTCTTTTAAGCGTGTGTATGGACCGGGTCATC
298	addA	AAGCTTTGCTCGAAGAAACTATGATTTGGCACGAAGTATATTCATCCGCAATTACGCATCAGCTATCCGACACTTCCGCTTGTATGGACCGGGTCATC
299	addA	AAGCTTTGCTCGAAGAAACTATGATTGATAATCCGTATCAGGATATACCGCTTGCCTCTGTGCTGCGCTCACCGATTGTTGTATGGACCGGGTCATC
300	addA	AAGCTTTGCTCGAAGAAACTATGATTACTGTTTAGCGATTTTGACAGCTGAGAATGACAAAGGTGAACGTGAGCCGAGCGATGTATGGACCGGGTCATC
301	addA	AAGCTTTGCTCGAAGAAACTATGATATGTCAAAGAAGATATTGCAATGGTGCTTAACGGGGCGAAGGAAAAGCTCTTGCGCTGTATGGACCGGGTCATC
302	addA	AAGCTTTGCTCGAAGAAACTATGAAGTTAAATACGTTTTACGGACATCTGCAAAAATGGCGCGCGTTTTCGAAAAACCACTCATGTATGGACCGGGTCATC
303	addA	AAGCTTTGCTCGAAGAAACTATGAAATCATGGAGGAGCTGAGAGCACAGGGCATACCGGTTTACGCCAATTTAACGTCTGTATGGACCGGGTCATC
304	addA	AAGCTTTGCTCGAAGAAACTATGAAAGCTCAAAACCGACTACTTCACGCGAAGTCCTGAACAGCACTTGAAAAGCCTAGCCTGTATGGACCGGGTCATC
305	addB	AAGCTTTGCTCGAAGAAACTATGTGGAAGAACTGTTTCCGCATCATAAGGAGCGCCTGTTAACAAATGAACCTGAACAGGTGTATGGACCGGGTCATC
306	addB	AAGCTTTGCTCGAAGAAACTATGTCCATATTCATGACCCGATGATTCAATCTAATCTCCCGCTTGGGCTTGACGAGATTTGTATGGACCGGGTCATC
307	addB	AAGCTTTGCTCGAAGAAACTATGGGCATTGCTCGGGAAATTCACGCCCTAGTCAGAGAGAAGGGATATCGCTATAAGGATGTGTATGGACCGGGTCATC
308	addB	AAGCTTTGCTCGAAGAAACTATGGCGCCAGCCGGAAGACTACAAGGATATGGTGAAGGAAGTTTTCGCAGATTACGAGTGTATGGACCGGGTCATC
309	addB	AAGCTTTGCTCGAAGAAACTATGGATCAGGAAGTGGTTCGCCTCATGGATACAACCCTTCAAGAGGGACGTTCAAATATCATGTATGGACCGGGTCATC
310	addB	AAGCTTTGCTCGAAGAAACTATGGACGGTTCAAGAGAAGGCGGAGGCGCTCTATCGTTATTTAGAAGAGACGGATGTGCTGTATGGACCGGGTCATC
311	addB	AAGCTTTGCTCGAAGAAACTATGGACGCAGTCATTCAGCTGCTTGAGGAGTTTGTTGAAATGATGGGAGATGATGAGATTTCTGTATGGACCGGGTCATC
312	addB	AAGCTTTGCTCGAAGAAACTATGGAATTTGGACATTACGTATAAAGAGCTGAGCGGGACTGAGCGGCATACAAAGACGCCTGTATGGACCGGGTCATC
313	addB	AAGCTTTGCTCGAAGAAACTATGGAATTGACCGTGTTGATAAGGCTGAAAGCTCAAAAGGCCTGCTCCTCAGGATTGTCTGTATGGACCGGGTCATC
314	addB	AAGCTTTGCTCGAAGAAACTATGCTGACGTACCTTGATTTATCGATTACACATTCAGCTGACTGGCTCGGGATGAGGGCTGTATGGACCGGGTCATC
315	addB	AAGCTTTGCTCGAAGAAACTATGCGATGAGGAACAGCTGATGTATGTTGTGAATAAAAGCGTGGCACAGTCCTTTACCGCTGTATGGACCGGGTCATC
316	addB	AAGCTTTGCTCGAAGAAACTATGCCTCATCTACATGGCGTTTTCAAGTCCGTCTGACCGGCTTTACGTATCGTATCCGTGTATGGACCGGGTCATC
317	addB	AAGCTTTGCTCGAAGAAACTATGCAGCTCTATGGTGAACGTATTCAGGGCAGTGTATCGAGAATGGAAACCTTTAACGCATGCTGTATGGACCGGGTCATC
318	addB	AAGCTTTGCTCGAAGAAACTATGAGGAATTCAGGGTGTTGGAGCAGCTTATGGTTCATGCGGAGCATATCACGTTTTCTGTATGGACCGGGTCATC
319	addB	AAGCTTTGCTCGAAGAAACTATGAAAATTACTGTATCGCCTATGGTATTAAAGGCGACCGCTGGACAAAGGGCGATCGGTTCTGTATGGACCGGGTCATC
320	adeC	AAGCTTTGCTCGAAGAAACTATGTTGGATTCAAGAGCGGAGCGATTGCCACAACCATTTCACACGACTCCCATAATATTATTTGTATGGACCGGGTCATC
321	adeC	AAGCTTTGCTCGAAGAAACTATGTTGCCCGCGAATTTGAGCCTGACACTGAGCTTGATTTGTTAAAGATTGCAGTTGTTGTATGGACCGGGTCATC
322	adeC	AAGCTTTGCTCGAAGAAACTATGTGCGATTACAGATGGAGTTATTGTAGGCCTCGGTGAGTATGAAGGCGAAAATATCATTGATGTATGGACCGGGTCATC
323	adeC	AAGCTTTGCTCGAAGAAACTATGTCAGGCGCAATTCTCAAAGCTGCCGATCTCAAGCCTTTTTATGAAGAAGAAGAAGTGTATGGACCGGGTCATC
324	adeC	AAGCTTTGCTCGAAGAAACTATGTATCAGAAGGGGCATGTATGTCATGATGCGTGAAGGATCAGTCGCCAAAAACACGTGTATGGACCGGGTCATC
325	adeC	AAGCTTTGCTCGAAGAAACTATGTACACCGCTGAATATCCATTTTATGCTTCCTTCCAGTGTGCCTGCCGCAAGTTTTTGTATGGACCGGGTCATC
326	adeC	AAGCTTTGCTCGAAGAAACTATGGCATGTGGATGATTTATTGTCAGAGGGAAGTGTAAACCATCAGGTGAAAATGGCGATTCATGTATGGACCGGGTCATC
327	adeC	AAGCTTTGCTCGAAGAAACTATGCTGAAAAAGACATGGTTCAGAAACTGCTTGATGCCCGTGTGGCAGGAAAAAGGATATGTATGGACCGGGTCATC
328	adeC	AAGCTTTGCTCGAAGAAACTATGCGCGGCGGCAGTTAATAAGCTGCAGGAAATTGGCGGAGGATTAACAATTATAAAAAATGGTGTATGGACCGGGTCATC
329	adeC	AAGCTTTGCTCGAAGAAACTATGCCCCGGGTTTTGACGCTGATTTGCTTTTTGTATCTGATCTGGAAAATGTCACTGTCTGTATGGACCGGGTCATC
330	adeC	AAGCTTTGCTCGAAGAAACTATGCAGAACCGCATTTGTCTTAAACGACCATGAAGTAACATCGAAGGAAGAAGCCCTTGATCGTGTATGGACCGGGTCATC
331	adeC	AAGCTTTGCTCGAAGAAACTATGCAATGTCATTCAAATCATACCAAATCAGCTTGAAACACGATTAGTACAAGTTCCGGCTCCTGTATGGACCGGGTCATC
332	adeC	AAGCTTTGCTCGAAGAAACTATGATTGAGTTCGCTAAAGCAGTGTTGCCTCATGGCGTGACGACGGTTGTTACAGATCTGTATGGACCGGGTCATC
333	adeC	AAGCTTTGCTCGAAGAAACTATGATCGGTTTCACAGGCGGATTTAATCCATTTTTGACATTGTCGTTTTTAGCGTTGCCTGTGTATGGACCGGGTCATC
334	adeC	AAGCTTTGCTCGAAGAAACTATGATCAGCTAGGAAGCCTCAATGCAGCCGAATGCTACGGATTAGATACAAAGGGAGCGATTTGTATGGACCGGGTCATC
335	adhA	AAGCTTTGCTCGAAGAAACTATGTTTTCCCTAATCATGGGGCGCCGCAGCATTGCAGGTTCTCTAGTCGGCGGAATTCTGTATGGACCGGGTCATC
336	adhA	AAGCTTTGCTCGAAGAAACTATGTTCCCCGCTGAAACACTGGAATGTTGGCCCTGGTAAAAAGGTTGCGATTGTAGGCTGTATGGACCGGGTCATC
337	adhA	AAGCTTTGCTCGAAGAAACTATGTTAAATTCAGCGGCATTTGCCATTCAGACATTCATAGCGCTTTTGATGAATGGGGTGTATGGACCGGGTCATC
338	adhA	AAGCTTTGCTCGAAGAAACTATGTGTTCAAACGTATAACTCAGTAGACTACGACGGAAACCCCACTTATGGCGGGTACAGCCATGTATGGACCGGGTCATC
339	adhA	AAGCTTTGCTCGAAGAAACTATGGGACATGAAATAGCCGGTGTTGTAACAGCCGTTGGAACAAAAGTCACCAAGTTGGTGTATGGACCGGGTCATC
340	adhA	AAGCTTTGCTCGAAGAAACTATGCTGACAGATTTGTTGTTCGCATACCAGATCGTTTGGAAATGGATGTTGCCAGTCCTGTATGGACCGGGTCATC
341	adhA	AAGCTTTGCTCGAAGAAACTATGCGTTGGTGTCGGCTGTTTTGTTGACTCTTGCGGAGAATGCGAATACTGTCTCAACTGTATGGACCGGGTCATC
342	adhA	AAGCTTTGCTCGAAGAAACTATGCCTATTTATCAATGCTTCGTATAGACGGGACACTTGTAAGCGTTGGAGCTCCTGCCAAGCTGTATGGACCGGGTCATC
343	adhA	AAGCTTTGCTCGAAGAAACTATGACATGCGATGGGTGCAGAAGTAACCGTCCTGAGCCGTTCCATGAATAAGAAAGAGTGTATGGACCGGGTCATC
344	adhA	AAGCTTTGCTCGAAGAAACTATGAAGTGGACGAGGCATACGAACGTATCCTCCGAAGCGATGTCCGTTATCGATTTGTTGTATGGACCGGGTCATC
345	adhA	AAGCTTTGCTCGAAGAAACTATGAAGAGATGCTGGATTTCGCAGCTGAGCATGGCATCGAACCTAAAATCGAAGTCATTGTATGGACCGGGTCATC
346	adhA	AAGCTTTGCTCGAAGAAACTATGAACTCGGTGCAAATCATTACTTTGCAACAAGTGACCCAGCCACATTCACTGCATTTGTATGGACCGGGTCATC
347	adhA	AAGCTTTGCTCGAAGAAACTATGAAATTTGAACAAACGACGATTGAGCGAAGAGGATTACGGCCGCACGATGTCTTAATCTGTATGGACCGGGTCATC
348	adhB	AAGCTTTGCTCGAAGAAACTATGTGTGATCAGTCTAATGACAATGGGGAAATGGGTGCTTATTTCGGCTATTCAGGGCAAATGTATGGACCGGGTCATC
349	adhB	AAGCTTTGCTCGAAGAAACTATGTGAAGGCAGTAACGTATCAAGGCATTAAAAATGTTGTTGTCAAAGATGTCCCCGATCCAATGTATGGACCGGGTCATC
350	adhB	AAGCTTTGCTCGAAGAAACTATGTATTCCCTTTAATATAGCATGCGGGGAATGCTTTTTTTGTAAAAACCAGCTGGAAAGCCATGTATGGACCGGGTCATC
351	adhB	AAGCTTTGCTCGAAGAAACTATGTAAAATCCCTGAATCTTGTGAGGAACCCGATGAGAAATTAAGCGTGATTGCCGATGCTGTATGGACCGGGTCATC
352	adhB	AAGCTTTGCTCGAAGAAACTATGGTCAGCCATGTCCTGCCGCTTAGTGAAGCCAAGCATGGCTATGACATTTTTGATTTGTATGGACCGGGTCATC
353	adhB	AAGCTTTGCTCGAAGAAACTATGGTCACCAGTACAGCCATTTGCGGATCAGATTTACATTTAATCCATGGATTCATTCCGAATGTATGGACCGGGTCATC
354	adhB	AAGCTTTGCTCGAAGAAACTATGGCGGTTATCCAGGCGGGCAAGCTGAATATTTAAGAGTGCCGTTTGCGAATTTTACTGTATGGACCGGGTCATC
355	adhB	AAGCTTTGCTCGAAGAAACTATGGCGCAAAACGCGTCATAGCAGTTGACTATGTAAACTATCGCTTACAGCATGCGAAACGTGTATGGACCGGGTCATC
356	adhB	AAGCTTTGCTCGAAGAAACTATGGATGTAGTCATTGACGCTGTTGGGATGGATGGTAAAATGAGCGATCTCGAGTTCCTTGTGTATGGACCGGGTCATC
357	adhB	AAGCTTTGCTCGAAGAAACTATGGATACAGTTATCGTTCTCGGCTGCGGACCAGTCGGCCTGTTTGCTCAAAAGTTTTTGTATGGACCGGGTCATC
358	adhB	AAGCTTTGCTCGAAGAAACTATGCTTAAAGCTTCATGGCGGAACGATGAGTGCATTGGTCATTGCTTCCCAAGCTGTTTGTATGGACCGGGTCATC
359	adhB	AAGCTTTGCTCGAAGAAACTATGATGCAGCGAAACGTCAATATACGCTCTGGACAGGCTCCAGTGATCCACTATATGCCTGTATGGACCGGGTCATC
360	adhB	AAGCTTTGCTCGAAGAAACTATGACCGATGGGAATCGTCGAAGAAGTTGGTTCTGGGGTGACTAAACTAAAAAAGGGAGATCGTGTATGGACCGGGTCATC
361	adhB	AAGCTTTGCTCGAAGAAACTATGAATTTTGAAGACCATGAGAATACAGGGAATTATTTAAAGGAAATCACGAAAGGCGGAGCGTGTATGGACCGGGTCATC
362	adhR	AAGCTTTGCTCGAAGAAACTATGTTGATGAAACAATTAAGAGATTAGACACAAAAATTAAAGATTATGATGGGAAATTGCGTGTGTATGGACCGGGTCATC
363	adhR	AAGCTTTGCTCGAAGAAACTATGTCAAATGGATTGAATTCATTAAATGCATGCGAAATGCGGGACTATCGATAGAAGCGCTGTATGGACCGGGTCATC
364	adhR	AAGCTTTGCTCGAAGAAACTATGCGAAGGTGACCGTACGGTAGAAGCTCGAAAAAATATCCTGGCTGACGAACGACAGTGTATGGACCGGGTCATC
365	adhR	AAGCTTTGCTCGAAGAAACTATGCAAAGCAGTTTGGCCTGACAGCCGCAACACTCCGATATTACGAACGTGTAGGATTATGTATGGACCGGGTCATC
366	adhR	AAGCTTTGCTCGAAGAAACTATGAAAATGAGGCAAAGCTCAAAAGCAGGCCTAAAACGGAAAGTCTTCACGGATCAGTGGTGTATGGACCGGGTCATC
367	adk	AAGCTTTGCTCGAAGAAACTATGTCGGACTCGAAGCAAAATCTTATATTGATAAGGGAGAGCTCGTACCTGACGAAGTCACAATGTATGGACCGGGTCATC
368	adk	AAGCTTTGCTCGAAGAAACTATGTCAGAGAAAGGTTATCTTGCAAACGTGAATGGCCAGCAGGACATTCAAGACGTTTATGCTGTATGGACCGGGTCATC
369	adk	AAGCTTTGCTCGAAGAAACTATGTATGGGATTCCTCATATCTCAACAGGAGATATGTTCCGTGCTGCTATGAAAGAAGAAACATGTATGGACCGGGTCATC
370	adk	AAGCTTTGCTCGAAGAAACTATGCTTAGTCTTAATGGGGCTTCCTGGTGCCGGTAAAGGCACACAGGGCGAACGAATTTGTATGGACCGGGTCATC
371	adk	AAGCTTTGCTCGAAGAAACTATGCTCAAGCCGAAGCTCTTGAAGAAATTCTTGAGGAATACGGCAAGCCGATTGATTATGTCATGTATGGACCGGGTCATC
372	adk	AAGCTTTGCTCGAAGAAACTATGAGAGACTTGGCAAAGATGATTGTGAAAGAGGTTTTCTTCTGGACGGATTTCCGCGAATGTATGGACCGGGTCATC
373	adk	AAGCTTTGCTCGAAGAAACTATGAGACGGAGGCGAACTCTATCAACGGGCAGATGATAATGAGGAAACAGTCTCTAAACGGCTTGTATGGACCGGGTCATC
374	adk	AAGCTTTGCTCGAAGAAACTATGACGTCTGACTGGACGCAGAATTTGCAGTGTTTGCGGCACAACCTATCATTTAGTCTTTTGTATGGACCGGGTCATC
375	ahpC	AAGCTTTGCTCGAAGAAACTATGTTTCTACAGATACTCACTTCGTACACAAAGGCTGGCATGACAGCTCTGAAAAAATCAGCATGTATGGACCGGGTCATC
376	ahpC	AAGCTTTGCTCGAAGAAACTATGTTGCCCGGCTAAATGGGAAGAAGGCGGCGAAACTCTTACACCTAGCCTTGATCTAGTAGTGTATGGACCGGGTCATC
377	ahpC	AAGCTTTGCTCGAAGAAACTATGTGGAGCGTATTCTGCTTCTACCCAGCAGATTTCTCTTTCGTATGCCCAACTGAGCTTGTGTATGGACCGGGTCATC
378	ahpC	AAGCTTTGCTCGAAGAAACTATGGCGGTATCGGCCGTGACGCAAGCAACCTTGTAAACAAAGTAAAAGCAGCTCAATATGTATGGACCGGGTCATC
379	ahpC	AAGCTTTGCTCGAAGAAACTATGGCAAAAGCATTCAAAAACGGTGAATTCATCGATGTAACAAACGAAGATTTGAAAGGCCAATGTATGGACCGGGTCATC
380	ahpC	AAGCTTTGCTCGAAGAAACTATGACCGCGGAACATTCATCATCGATCCAGACGGCGTTATCCAAACTGTTGAAATCAATTGTATGGACCGGGTCATC
381	ahpC	AAGCTTTGCTCGAAGAAACTATGACCCATCTCAAACGATCTCTCGCAACTTCGATGTTCTTGACGAAGAAACTGGCCTTGTATGGACCGGGTCATC
382	ahpF	AAGCTTTGCTCGAAGAAACTATGTTCTCAAAGTTAGCGCAGGCGAAGATGACACTTCTAAGGACATGCTGGCTCTCGTTTGTATGGACCGGGTCATC
383	ahpF	AAGCTTTGCTCGAAGAAACTATGTCAGTGGTGAATACCACTTCGAATCTTATATCAGCCTGACATGCCACAACTGTCCTGATGTGTATGGACCGGGTCATC
384	ahpF	AAGCTTTGCTCGAAGAAACTATGTATTGATGTCATGAACCTTCAGCGTGCGAAACGCCTTGAGAAGAAAGATCTGTTCGTGTATGGACCGGGTCATC
385	ahpF	AAGCTTTGCTCGAAGAAACTATGGTTTACCTGAATGGCGAATCCTTCGGAAGCGGCCGTATGACGCTTGAAGAAATTCTTGTATGGACCGGGTCATC
386	ahpF	AAGCTTTGCTCGAAGAAACTATGGTACCAGGCTTATTTGCTGCCGGCGACTGCACAGACAGTGCGTACAACCAAATTATTATTGTATGGACCGGGTCATC
387	ahpF	AAGCTTTGCTCGAAGAAACTATGGAACTTCAAGGTGTATTCGTCCAAATCGGTCTCGTGCCAAACACAGAATGGTTAGAAGGATGTATGGACCGGGTCATC
388	ahpF	AAGCTTTGCTCGAAGAAACTATGGAACTCGAAAACGGCGCTGTCCTGAAAAGTAAAACAGTGATCCTTTCAACAGGTGCACTGTATGGACCGGGTCATC
389	ahpF	AAGCTTTGCTCGAAGAAACTATGGAAAACTTCATCAGCGTCAAAGCGACGGAAGGACCGAAGCTAGCGGCAAGTCTTGTGTATGGACCGGGTCATC
390	ahpF	AAGCTTTGCTCGAAGAAACTATGCGAACATTACGCACACGATGATTGACGGTGCAGCATACAAAGCAGAAGTTGAAAGTGTATGGACCGGGTCATC
391	ahpF	AAGCTTTGCTCGAAGAAACTATGATTGTCAATCACGTTACTGTACTAGAATTCGCGCCGGAACTGAAAGCAGACGAAGTCCTGTGTATGGACCGGGTCATC
392	ahpF	AAGCTTTGCTCGAAGAAACTATGATTAGTGTTGGCGTTGCTCCAAGTGAGCGGCAGACCGCCTAAGGTAGACCAAAAAGTTGTATGGACCGGGTCATC
393	ahpF	AAGCTTTGCTCGAAGAAACTATGAGCTGAATTAAACAGAACGCCGAGCTTCAGTGTCAATCGTGTCGGAGAAGACACTGTGTATGGACCGGGTCATC
394	ahpF	AAGCTTTGCTCGAAGAAACTATGACAGATGCATCTGAGTTTGCTGACAAAGAGCCGTTTGACGTTCTTGTGGTCGGAGTGTATGGACCGGGTCATC
395	ahpF	AAGCTTTGCTCGAAGAAACTATGAACGTTACTGTCGTGAAAAACGCACAAACAAAAGAAATCACAGGTGATCAGAGTGTTTGTATGGACCGGGTCATC
396	ahrC	AAGCTTTGCTCGAAGAAACTATGTATTTGCCGGACTCCTGAAGATACAGAAGGCGTAAAAAACAGGCTCCTTGAACTGCTGTGTATGGACCGGGTCATC
397	ahrC	AAGCTTTGCTCGAAGAAACTATGGTGCCTACAAATAATGGTTCTTACAAATACAGTCTTCCGGCGGACCAGCGTTTCAATCCGTGTATGGACCGGGTCATC
398	ahrC	AAGCTTTGCTCGAAGAAACTATGGGACAATTTGGACTGGGATGAAATGATGGGGACCATTTGCGGAGATGATACGATTTTAATTGTATGGACCGGGTCATC
399	ahrC	AAGCTTTGCTCGAAGAAACTATGAAGCTAAAGCGGGCATTGATGGACGCATTTGTGAAAATAGACTCAGCAAGCCATATGATGTATGGACCGGGTCATC
400	ahrC	AAGCTTTGCTCGAAGAAACTATGAAATCGAAACGCAGGATGAATTGGTCGACATGCTAAAGCAGGATGGATACAAAGTAACGCTGTATGGACCGGGTCATC
401	alaR	AAGCTTTGCTCGAAGAAACTATGTATTATCGATTATTCCGCTATGATTGACTGGCGAAAAGTCGACGGACATGAGGGCGTTGTATGGACCGGGTCATC
402	alaR	AAGCTTTGCTCGAAGAAACTATGGACGTAGCGCGTTTTGTTTCGGATAAACTCTCAACGCTTGATTCAGTTGTATCTACGACATGTATGGACCGGGTCATC
403	alaR	AAGCTTTGCTCGAAGAAACTATGAGTTTACCTGATGTCAGGCGTATACGATTTGTCTGTCGTGATTCGCGGCAATTCGTGTATGGACCGGGTCATC
404	alaR	AAGCTTTGCTCGAAGAAACTATGAGAAATTTTAGACGAAAACAGCCGCGCCGATTTAGAAACAATCGCAAAGATGGCGTGTATGGACCGGGTCATC
405	alaR	AAGCTTTGCTCGAAGAAACTATGAATACAAGCATGACGGCAAAGTGTTTGAAACAGGAGACGACGACAAAAGAATCGTGGTGTATGGACCGGGTCATC
406	alaR	AAGCTTTGCTCGAAGAAACTATGAAGCGGGGCGTCGGTTTTGATGAAGTGGCGGAACGGATTTACCGATTCCAAGAGGTTTGTATGGACCGGGTCATC
407	alaS	AAGCTTTGCTCGAAGAAACTATGTCTCAGAGTTCAACCATAACCCTGACGGCACGTACACACCGCTTCCAAAGAAAAATATTGTGTATGGACCGGGTCATC
408	alaS	AAGCTTTGCTCGAAGAAACTATGTACATGGGCTTGGGAGTTTTTAACGAGCGACAAGTGGATTGGCTTCGACAAAGAGTGTATGGACCGGGTCATC
409	alaS	AAGCTTTGCTCGAAGAAACTATGGTATGGATTCCCGGTTGAATTGACTGAAGAATACGCAGAAGACGAGAACATGACGGTTGTGTATGGACCGGGTCATC
410	alaS	AAGCTTTGCTCGAAGAAACTATGGCATCAGGCTCTAAAAGATGTTCTTGGAACTCATGTCAATCAGGCGGGCTCTCTTGTGTATGGACCGGGTCATC
411	alaS	AAGCTTTGCTCGAAGAAACTATGGCACTGTTCGGCGAAAAATATGGCGATATTGTCCGTGTCGTTCAAGTTGGAGATTATGTATGGACCGGGTCATC
412	alaS	AAGCTTTGCTCGAAGAAACTATGGACATGAATCATCTCCGCACTATGGTCGATGAACTCAAAGCAAAGCTTGGCTCTGTGTATGGACCGGGTCATC
413	alaS	AAGCTTTGCTCGAAGAAACTATGGAAATCTTTTACGACCGCGGTGAAGCATACGGTAATGATCCAGAAGATCCGGAGCTTTTGTATGGACCGGGTCATC
414	alaS	AAGCTTTGCTCGAAGAAACTATGCTGAAGTTGAAGACCATATGAGAAGCGGCGTCATTAAAAACCACACGGCAACGCATTTATTGTATGGACCGGGTCATC
415	alaS	AAGCTTTGCTCGAAGAAACTATGCTGAAGAAAGAATTATCCGTCTGGAAGGGAACTTCTGGGATATCGGTGAAGGGCCGTGTATGGACCGGGTCATC
416	alaS	AAGCTTTGCTCGAAGAAACTATGCGGATTTCATCGCAAAAGTCATTAAAACCGAGGAAGAACGCTTCCATGAGACCCTTAATGTGTATGGACCGGGTCATC
417	alaS	AAGCTTTGCTCGAAGAAACTATGCAGGCATGGGTCTTGAAAGAATGGTGTCTGTCATCCAGAATGTTCCGACAAACTTTTGTATGGACCGGGTCATC
418	alaS	AAGCTTTGCTCGAAGAAACTATGATACAGCAGAAATCGGCTTGTTTAAAATCGTTTCTGAATCCGGAATCGGAGCAGGCACTGTATGGACCGGGTCATC
419	alaS	AAGCTTTGCTCGAAGAAACTATGAGTCACAAAGGACCTCATTGAGAAAGGACTTCACGCCGGCAAGCTGGTTAAACAAGTGTATGGACCGGGTCATC
420	alaS	AAGCTTTGCTCGAAGAAACTATGAGGAGAAAGCGTTCAAATCATTCTTGATGAAACACCGTTCTATGCAGAAAGCGGCGTGTATGGACCGGGTCATC
421	alaS	AAGCTTTGCTCGAAGAAACTATGAACGGGACAAGGCGCTTACGTCGAAATGAACAGCCAGATTTCTGTATTGAAGCAGTGTATGGACCGGGTCATC
422	alaT	AAGCTTTGCTCGAAGAAACTATGTTGTTCCTGGAAGTGTGTTTGGTCCGAGCGGTGAGGGATATATCCGTTGTTCATATGTATGGACCGGGTCATC
423	alaT	AAGCTTTGCTCGAAGAAACTATGTGACTTCGTATTTATCAGACTATGTACAACAAATAAAACCATCCGGCATCCGCAAATTCTTGTATGGACCGGGTCATC
424	alaT	AAGCTTTGCTCGAAGAAACTATGTATCGAAGAAGACGGAATCTGTTTGTAGAATCGCTCAATGAAATCGGTCTCAGCTGTCATGTATGGACCGGGTCATC
425	alaT	AAGCTTTGCTCGAAGAAACTATGGTCGGCGAGCCTGATTTTGTTACCGCATGGAATGTCCGCGAAGCAAGCATTCTCTTGTATGGACCGGGTCATC
426	alaT	AAGCTTTGCTCGAAGAAACTATGGCACCATCCTTGCTTCGGGATGCCATGCTTAAAATTCATCAGTATGCGATGATGTTGTATGGACCGGGTCATC
427	alaT	AAGCTTTGCTCGAAGAAACTATGGAACAAGGATATACGTCATACACGGCCAATGCGGGTTTATACTCATTGCGGGAGGAAATGTATGGACCGGGTCATC
428	alaT	AAGCTTTGCTCGAAGAAACTATGCATTGTGAATCCAGGTGAGGAAGTCATCATTCCTGAGCCGTGTTTTGTTGCGTACTGTATGGACCGGGTCATC
429	alaT	AAGCTTTGCTCGAAGAAACTATGATACAACGGCAGACAAAGGATTTAAAGCAACGGCTGCTGATTTTGAAGCGGCAGTTGTATGGACCGGGTCATC
430	alaT	AAGCTTTGCTCGAAGAAACTATGAGTTTGCCGCCCTTGAAGGCCTGAAGAACGGCATGGAAGACGTAGAAAAAATGAATGTATGGACCGGGTCATC
431	alaT	AAGCTTTGCTCGAAGAAACTATGAGCATGGGAATGAGTTCAGAACAGTTTGCCGAGGAGCTACTGACGCAGGAAAAAGTTGTATGGACCGGGTCATC
432	alaT	AAGCTTTGCTCGAAGAAACTATGACGCGGAGCTGACATATGATGAGGAATTTACAAGTATAGCGGCATTACCGGGAATGAAGGTGTATGGACCGGGTCATC
433	alaT	AAGCTTTGCTCGAAGAAACTATGACCTTAGCTACTCGCCAGATAATGAGCTGATTGTGACAGTGGGGGCAAGTCAGGCTTGTATGGACCGGGTCATC
434	alaT	AAGCTTTGCTCGAAGAAACTATGAACGGACGGTAGTCATCTCAGGCTTTTCAAAAGCATTTGCAATGACGGGCTGGAGTGTATGGACCGGGTCATC
435	alaT	AAGCTTTGCTCGAAGAAACTATGAAAAACAAAGGCCATTCTCATCTGCTCACCATCGAATCCGACAGGTTCGGTTTATTCTGTATGGACCGGGTCATC
436	albA	AAGCTTTGCTCGAAGAAACTATGTGGAAGTCCATTGTGATCAGTCCGTTCGGCGAAGTACGTCCTTGCGCCCTCTTTCTGTATGGACCGGGTCATC
437	albA	AAGCTTTGCTCGAAGAAACTATGTGAGTATTTGGATCTCAACAAAACGGCTTACGAGCTCTGCATGCGCATGGATGGCTGTATGGACCGGGTCATC
438	albA	AAGCTTTGCTCGAAGAAACTATGTCCGAGGTCCATGACTCCTTTAGAGGGAGAAAAGGCTCTTTTGCCCAAACTTGTAAAACGTGTATGGACCGGGTCATC
439	albA	AAGCTTTGCTCGAAGAAACTATGTCATGATTCCTATGAAAGCATCTTTAACTCCCCTCTCGTCCATAAACTGTGGCAAGCGCTGTATGGACCGGGTCATC
440	albA	AAGCTTTGCTCGAAGAAACTATGTATCACCGGAAAAACATTTGCTCTTGGGCGAAAAATGAACAATTAGAAGACGTGGTCCATGTATGGACCGGGTCATC
441	albA	AAGCTTTGCTCGAAGAAACTATGGTCAGAGTCGCTATGTCTGTCTTCGAAAAAAACATGTGGGAAATCCACGATATGGCCCTGTATGGACCGGGTCATC
442	albA	AAGCTTTGCTCGAAGAAACTATGGCTGAGCAGATTTTAGCTGAGCAATGTGCAGTGTATGATGAATCACCGGAAGACCATGTATGGACCGGGTCATC
443	albA	AAGCTTTGCTCGAAGAAACTATGGCGAAATCACAGGTGGAGAAATTTTTGTCCATCCAAACGCCAATGAGATTCTTGACTATGTGTATGGACCGGGTCATC
444	albA	AAGCTTTGCTCGAAGAAACTATGGCCGAGCAGCACCGCAAGTTTATGGAATACGAGCAACATGTGATTGATGAGTTTAAAGATTGTATGGACCGGGTCATC
445	albA	AAGCTTTGCTCGAAGAAACTATGGAGAGCCTGGAGCTTTTGAAGACTTACAAGCAAAAAATCATCGTCGGCATTTCTCTAGATGTATGGACCGGGTCATC
446	albA	AAGCTTTGCTCGAAGAAACTATGCTTTGAACTGACGCACCGCTGTAATTTGAAATGCGCCCACTGTTATTTGGAAAGCTTGTATGGACCGGGTCATC
447	albA	AAGCTTTGCTCGAAGAAACTATGCTTCCTGAGGGCGGCGTGTTAGAAATCGACTACTTGCGCGATAATGTCTCCATTTTGTATGGACCGGGTCATC
448	albA	AAGCTTTGCTCGAAGAAACTATGAAGGTTCGGGATCTCGGGGCGAAGGCGTTTTCTTACAATTGGGTTGACGATTTCGTGTATGGACCGGGTCATC
449	albA	AAGCTTTGCTCGAAGAAACTATGAAATGCCCGTTCAGCGGCTATTGCGGAGGCTGTTACTTAAAAGGGCTGAACTCTAATGTATGGACCGGGTCATC
450	albB	AAGCTTTGCTCGAAGAAACTATGTTGTCATCGGCGCAGTCGTCTATTTTGTCAAAAGCGATTATCTGTTTACGCTGATTTTCATGTATGGACCGGGTCATC
451	albC	AAGCTTTGCTCGAAGAAACTATGTTTACGGGTTACTTGGGGTAAACGGCGCCGGAAAAACGACACTGATTAATACGCTGTGTATGGACCGGGTCATC
452	albC	AAGCTTTGCTCGAAGAAACTATGTTGGATGAGCCGCTCGTCGGTTTGGATGTGGAATCGATAGAGGTCTTTTATCAGAAAATTGTATGGACCGGGTCATC
453	albC	AAGCTTTGCTCGAAGAAACTATGTGATTATGCGGCTATTCTTCACAACAAACAGATCCAAAAGGTCATTCCGATTGGAGAGGATGTATGGACCGGGTCATC
454	albC	AAGCTTTGCTCGAAGAAACTATGTCCGCTGCTATTTACAGAAATTACGGCGAAGGACTATGTGTCTTTCGTCCATTCGCTTTTGTATGGACCGGGTCATC
455	albC	AAGCTTTGCTCGAAGAAACTATGGTGAGTACTGTGAAGCAGGCGGAACCATTTTGTTTTCTTCTCATCTGCTCGATGTCGTTGTATGGACCGGGTCATC
456	albC	AAGCTTTGCTCGAAGAAACTATGGATTTTTCAGAGCAGCAGTTTGCCAGTTTGGCCGAGGCCTTTCATTTTTCGAAATATGTATGGACCGGGTCATC
457	albC	AAGCTTTGCTCGAAGAAACTATGGAGGCCGGCATGCCGCAGAAAACATCAGATCAGCTGAAGACTCACCGTTACTTCGTGTATGGACCGGGTCATC
458	albC	AAGCTTTGCTCGAAGAAACTATGGAATTTCGGAGCTGTCCTTGGGGAACAGGCAAAAGGTTGTATTGATGACAGGCTTTGTATGGACCGGGTCATC
459	albC	AAGCTTTGCTCGAAGAAACTATGACACGATGTATCCGTTTGGTATGAACGGGACAACGTCATCTTAGAACAAGTGGATTTACATGTATGGACCGGGTCATC
460	albD	AAGCTTTGCTCGAAGAAACTATGTTTTTATTTTACCGCTGTTCTTATTTGGAAACGGAACGCTGTCAGGGGCGCAAACATGTATGGACCGGGTCATC
461	albD	AAGCTTTGCTCGAAGAAACTATGTTTCATCAGCGGCCGTTCGATTTCAGTTCTCACTTTTTTGCAGTGCATTGAGTTGTGTATGGACCGGGTCATC
462	albD	AAGCTTTGCTCGAAGAAACTATGTCCGATAGCCGGTCTGGTCATAGTCTATTACCTGCAAAAACAGGATGGTGGTTTCTTTGATGTATGGACCGGGTCATC
463	albD	AAGCTTTGCTCGAAGAAACTATGTATCTGTTTTGTCTTCCCCTATTCTTAGCCATATTAGCCGGCACCGCTGTATCCTTGGCGTGTATGGACCGGGTCATC
464	albD	AAGCTTTGCTCGAAGAAACTATGTAAATTACGCGGTAATGGCGGTATTCAGCGGCTTCTTTTCGTTCCAGATGATGAACACTGTATGGACCGGGTCATC
465	albD	AAGCTTTGCTCGAAGAAACTATGGGAGCTTTTGGCTCGCCCAGAGTGTCGTTTTGTTTGTCGATACCTGTTTGAGAAGTGTATGGACCGGGTCATC
466	albD	AAGCTTTGCTCGAAGAAACTATGGCATTGATGAATCGGTGTTGCGCAAAACGTATATCATACTCGCGCTTCTTTTGATGATGTATGGACCGGGTCATC
467	albD	AAGCTTTGCTCGAAGAAACTATGGAAGAACTTGATGTTTCTGCTGCATGCGGCGATATTCGCCTGTGTATGTATCAGCTGTATGGACCGGGTCATC
468	albD	AAGCTTTGCTCGAAGAAACTATGCTTTTGCTCATCTGCTCGCCGATCGCCCTTTTGTATTCGATTGAAAAAAATGACCTGTATGGACCGGGTCATC
469	albD	AAGCTTTGCTCGAAGAAACTATGCTTTGCGCGGTTCATATCCTGTGGGCGGTGGTCATTGACTTTCCTGTCTTTCTGCTGTATGGACCGGGTCATC
470	albD	AAGCTTTGCTCGAAGAAACTATGCCTATCATGTCTTTGCTGTTCAAACAGCTTTACAGCCGGCAAGGGAAAAAGGACGTGTATGGACCGGGTCATC
471	albD	AAGCTTTGCTCGAAGAAACTATGCCCTCCTTCAGCTGGCAGACGGAGCAGCAGCTATGGAGCGGTTTCTCAAAATATCTGTATGGACCGGGTCATC
472	albD	AAGCTTTGCTCGAAGAAACTATGCAGCAGGGCAAGATGCATTCATTTATGCGGCGATCTGAATTTTCGTTTTACAAAAGAGATGTATGGACCGGGTCATC
473	albD	AAGCTTTGCTCGAAGAAACTATGATATCGCTTTTATTCAGGCCTATTGGCAGGCGGATTTCTCCTTGTCGTGATGATTGTGTGTATGGACCGGGTCATC
474	albE	AAGCTTTGCTCGAAGAAACTATGGCTTTTGGTTATGCTGCCGGCAGCCGTTTCATGTACTCAGCGAATCTCTTTTTTGTGTATGGACCGGGTCATC
475	albE	AAGCTTTGCTCGAAGAAACTATGGCTGTAACGTCCGGAAGAATACCCGTAAACCGGCATGTTTTTGAAACAGAGACACGTGTATGGACCGGGTCATC
476	albE	AAGCTTTGCTCGAAGAAACTATGGCATCTCAGCGGTTACATGCCGTGATGTATTGCAATTCATAGCGACCATCAATTATATCGTGTATGGACCGGGTCATC
477	albE	AAGCTTTGCTCGAAGAAACTATGGAGACAGGATAAAGGCGATTCATCCTAAACGGTTTCTCGACGCAACGGACTTTATCGTTGTGTATGGACCGGGTCATC
478	albE	AAGCTTTGCTCGAAGAAACTATGGAAGGTCTATTGGCCTATATGGGGGTCCTGCGCCGCTTCTCCTGCACGAAAGAAGTGTATGGACCGGGTCATC
479	albE	AAGCTTTGCTCGAAGAAACTATGGAAGGATCTGGCAGTCTATCACGTTATCACCCGTTACGATGTCATGAACAATTTGCTGCTGTATGGACCGGGTCATC
480	albE	AAGCTTTGCTCGAAGAAACTATGCTTTCTGAAACCGATCGAAAGCGCGGCGGAACCTGAGGAAGAAACGATTTATTTTTACTGTATGGACCGGGTCATC
481	albE	AAGCTTTGCTCGAAGAAACTATGCCGTCTTGACACTCGGATTTGACTGCGGAGAGATGAAAGATGCCAGCGATTATATCTGTATGGACCGGGTCATC
482	albE	AAGCTTTGCTCGAAGAAACTATGCCCTGATGAAAACTTTTGCAGACTTGTCTTTCCCTTCTTCTCTTTCATTCGAAGCATTTGTGTATGGACCGGGTCATC
483	albE	AAGCTTTGCTCGAAGAAACTATGCAGCTGAAAACCTGCGGGACCCGTTTGATTCACCCATTATATAACGGGAATCTTCATTGTATGGACCGGGTCATC
484	albE	AAGCTTTGCTCGAAGAAACTATGACAGCTAATAGACGGATTACTGGGAAAGTACGGCCATTCCGCTTTATTCAAGCACTTCATGTATGGACCGGGTCATC
485	albE	AAGCTTTGCTCGAAGAAACTATGACAGATGAGCGGGAACTAGAACAGGCAAAGCAGTTTTTACGCAATGAATTGCTGCTGTGTATGGACCGGGTCATC
486	albE	AAGCTTTGCTCGAAGAAACTATGAAACAGCTGAACATATTGGGACAAGTACAAGCATGTGATGTTCGGGGACATGCCCTGTATGGACCGGGTCATC
487	albE	AAGCTTTGCTCGAAGAAACTATGAAAAGAAATTCACTGATCCCTTCTCCTACTCGGCGGCTCGCTTGGCTGAGGAGGTTGTATGGACCGGGTCATC
488	albF	AAGCTTTGCTCGAAGAAACTATGTGGAAATCGATCGCTTGTCAGCCGAGACTTATATATATGAGGATGGCGGTTTCTTGATCCTGTATGGACCGGGTCATC
489	albF	AAGCTTTGCTCGAAGAAACTATGTCACAGTCAAGGGACCCATTCTTCAGCTTATATCGATGTGGCTTCATACTATGTCACACATGTATGGACCGGGTCATC
490	albF	AAGCTTTGCTCGAAGAAACTATGTATGGCACAGCACATTTTTTAGAGCATCTTCTCTTCTGGCATAACGGCCGCAATCTGTATGTATGGACCGGGTCATC
491	albF	AAGCTTTGCTCGAAGAAACTATGTATCAGATACACAGACAGCGGACTAAAAATATTCAGATTGAAATTCCCCCGCGCCCACCTGTATGGACCGGGTCATC
492	albF	AAGCTTTGCTCGAAGAAACTATGGTGTGACAGGTGCGATTGCTCGTTTCTTGACATGTACCACATCATTCAAGATATGGATGTGTATGGACCGGGTCATC
493	albF	AAGCTTTGCTCGAAGAAACTATGGCAGGTTTTCTTGTCTCTCATTGATGCAATGGCATCTTCTAACAAAGCGATCATTCACGTGTATGGACCGGGTCATC
494	albF	AAGCTTTGCTCGAAGAAACTATGGAAACGCTTTTGCCTCCTCACCTCCAGCTGGAAAAGCGTCCGGATTATCATGCTGTGTATGGACCGGGTCATC
495	albF	AAGCTTTGCTCGAAGAAACTATGCTTCAATACGGCAAGGACTCTTTGACAGACGCGATCATTTATGACAGCGATTATGTGCGTTGTATGGACCGGGTCATC
496	albF	AAGCTTTGCTCGAAGAAACTATGCGGCTGTGCAATGTAAAAATCGATTTTGGAAGCCGGGATGTATGTATACGGGCAGTGTATGGACCGGGTCATC
497	albF	AAGCTTTGCTCGAAGAAACTATGCGCATGGCGCGCTTTTAAACGCATTCACTACCTACACCGATACCAATTTCATGTTTTGTATGGACCGGGTCATC
498	albF	AAGCTTTGCTCGAAGAAACTATGCGCAGGCAGAATCGAAGATATTGAGGCGCTGGACATCAGTGATTTACAAAAAGCCTATGTATGGACCGGGTCATC
499	albF	AAGCTTTGCTCGAAGAAACTATGCCGGGCAAAACGATCTGTTGTCGATAAAGCTTTATTGGGATATCGCGGCTCGTATTGTATGGACCGGGTCATC
500	albF	AAGCTTTGCTCGAAGAAACTATGATCGGCTCAGACAAACGATTCCCATCCTGCTTGATGCTTTATGGAACCACTCATTTGTATGGACCGGGTCATC
501	albF	AAGCTTTGCTCGAAGAAACTATGAGTCCTCTCACAAAAAATGATGCTGGGTGATGAGGAGCGGATGGAAGATACCTGGTGTATGGACCGGGTCATC
502	albG	AAGCTTTGCTCGAAGAAACTATGTTATTGCTGCTTATAGGTATGGCGGCTTATTCCTTCGGCTGGGTTCAGGCCGTTGTGTATGGACCGGGTCATC
503	albG	AAGCTTTGCTCGAAGAAACTATGTGGGACTTGCGATGCTACTGATCCTGTATTTATTGTTTTGCATGCGAACGTATTTGCGTGTATGGACCGGGTCATC
504	albG	AAGCTTTGCTCGAAGAAACTATGGGCTGCCATTCAGCAAATCGGATCATTTATTTATAAACGATTCTCTTATCACAGCACCGCTGTATGGACCGGGTCATC
505	albG	AAGCTTTGCTCGAAGAAACTATGCTGGCAGCAGCCGGGATTTGGTGGATGCTCAGTTTCTCTATAAGTGAACTGCTGTTGTATGGACCGGGTCATC
506	albG	AAGCTTTGCTCGAAGAAACTATGCACCCAATCCGTGAAAAACATGACAGCAGCTTTTCAGAAACTCACACAGTCTCATCATGTATGGACCGGGTCATC
507	albG	AAGCTTTGCTCGAAGAAACTATGATCATATTCGGCTGCATGTTCGAAATCGTTAAAGCCGTCCCTTTCCGCCTTCATACTGTATGGACCGGGTCATC
508	albG	AAGCTTTGCTCGAAGAAACTATGAGAAGACGTCAAATCGCTGCGTGACAGCTATAAAAACGTCCGCCAAACATACGTGTGTATGGACCGGGTCATC
509	albG	AAGCTTTGCTCGAAGAAACTATGAATATGTACAGATGATCAACAATGATGCTGTGCGGCTCGGACTGCTGGCTTGTACCTGTATGGACCGGGTCATC
510	ald	AAGCTTTGCTCGAAGAAACTATGTGGTAAAACAAATGAAACCCGGTTCAGTTATTGTTGATGTAGCGATCGACCAAGGCGTGTATGGACCGGGTCATC
511	ald	AAGCTTTGCTCGAAGAAACTATGGGTGCAGATGTGACGATCATTGACTTAAACGCAGACCGCTTGCGCCAGCTTGATGTGTATGGACCGGGTCATC
512	ald	AAGCTTTGCTCGAAGAAACTATGGCGGAAAAGTAACAATTATCGGAGGAGGCGTTGTCGGGACAAACGCGGCGAAAATTGTATGGACCGGGTCATC
513	ald	AAGCTTTGCTCGAAGAAACTATGGAGTATGTTCCTGCCGAGAAAGCTTTACAGGATGAATCATCTGTGGCGGGTGCTTTGTATGGACCGGGTCATC
514	ald	AAGCTTTGCTCGAAGAAACTATGCTAACGTTACTGTTCCATACGCGCTGCAAATCGCGAACAAAGGGGCAGTAAAAGCTGTATGGACCGGGTCATC
515	ald	AAGCTTTGCTCGAAGAAACTATGCGGGTTTAAACACCGCAAACGGACACGTGACCTATGAAGCTGTAGCAAGAGATCTAGGTGTATGGACCGGGTCATC
516	ald	AAGCTTTGCTCGAAGAAACTATGCCTTGGAAGCGGATTTGAAAATGAAGCCTATGAGTCAGCAGGAGCGGAAATCATTTGTATGGACCGGGTCATC
517	ald	AAGCTTTGCTCGAAGAAACTATGCACAGGCCTTGAAGGATAAAGGAGTAACTGCCATCGCATATGAAACGGTCAGTGAAGGTGTATGGACCGGGTCATC
518	ald	AAGCTTTGCTCGAAGAAACTATGATAAAAAACAATGAAAACCGTGTCGCATTAACACCCGGGGGCGTTTCTCAGCTCATTGTATGGACCGGGTCATC
519	ald	AAGCTTTGCTCGAAGAAACTATGACCGCTGCCGGAAGAATATGTTTATTTTCGCAAAGGACTTGTGCTGTTTACGTACCTTCATGTATGGACCGGGTCATC
520	ald	AAGCTTTGCTCGAAGAAACTATGAATCGGCGCTCAATTCTTAGAAAAGCCTAAAGGCGGAAAAGGCATTCTGCTTGCCTGTATGGACCGGGTCATC
521	ald	AAGCTTTGCTCGAAGAAACTATGAACATATGAAAAACACGGGGTTGTGCATTATGCTGTAGCGAACATGCCAGGCGCAGTTGTATGGACCGGGTCATC
522	ald	AAGCTTTGCTCGAAGAAACTATGAAACGTTAATTTCTAATCCGGTCAATATTGCTGATGCTGTGGCGGAAGCGGATCTCCTTGTATGGACCGGGTCATC
523	aldX	AAGCTTTGCTCGAAGAAACTATGTCGGTTCATCGTTAAGCCCTGACGCAAACGGAATTCTTATGTACGAGCCTAAAGGCTGTATGGACCGGGTCATC
524	aldX	AAGCTTTGCTCGAAGAAACTATGGTTCATTAAAAAAGACGTTCAGGACAGGTTCGCGGGGATTTTACAAACAGTCGTCAACGTGTATGGACCGGGTCATC
525	aldX	AAGCTTTGCTCGAAGAAACTATGGGTTGAGGTGGCAACCGAACTACTTGATCAGCCGTTCGACCATATTTTCTTCACTGTGTATGGACCGGGTCATC
526	aldX	AAGCTTTGCTCGAAGAAACTATGGGATTTATGGAGGATGATCATACCCCAGACCGCAGCAAATTTACGCAGATCGTCAATTGTATGGACCGGGTCATC
527	aldX	AAGCTTTGCTCGAAGAAACTATGGAAAATTGTCATGACAGCGGCTGCCAAACACTTGGCATCTGTCACACTTGAGCTTTGTATGGACCGGGTCATC
528	aldX	AAGCTTTGCTCGAAGAAACTATGCGTCAACACAAGCGGAATCGGCTCCTATCATGGGGTATACGGATTCAAAGAGTTTTCTCTGTATGGACCGGGTCATC
529	aldX	AAGCTTTGCTCGAAGAAACTATGATGTGTTCAGCAAAAACCAAGATCTGATTGACAACGTCCTTCAGCACACGACATCAGTGTATGGACCGGGTCATC
530	aldX	AAGCTTTGCTCGAAGAAACTATGAAGAGCCCGACGATCATTGACAGTGAATACGATCTGATGGACGCAGCGAAAAAGATTGTATGGACCGGGTCATC
531	aldX	AAGCTTTGCTCGAAGAAACTATGAAGAAGAAATCATCGAAGCGATCCGCAAAGACGTCCGCAAACCATATCACGAAGTTGTATGGACCGGGTCATC
532	aldX	AAGCTTTGCTCGAAGAAACTATGAACTTCAACCGCGTCAAAGATCTGTTCGACGATGCCATCGAAAGAGGGGCGGAAGTTGTATGGACCGGGTCATC
533	aldX	AAGCTTTGCTCGAAGAAACTATGAAAATCATGCAGGAGGAAATCTTCGCATCGATCCTGCCAATGATGAACTATGAAGACATCTGTATGGACCGGGTCATC
534	aldY	AAGCTTTGCTCGAAGAAACTATGGTTTGAACACGCCGGTCTTCCTGCCGGTGTCCTTAACGTCATGCTGACGGATGTAAAGTGTATGGACCGGGTCATC
535	aldY	AAGCTTTGCTCGAAGAAACTATGGTGGGTCGTCGAGGAATTTACCGTGACGAAATGGATTTCGATACAGAAGCAATACCGTGTATGGACCGGGTCATC
536	aldY	AAGCTTTGCTCGAAGAAACTATGGTAACAGCGTTGTTCACAAGCCTGATATCCAAACTGCTATTTCCGGCGGGACCATTGTATGGACCGGGTCATC
537	aldY	AAGCTTTGCTCGAAGAAACTATGGGACATTTTGAATCCGTATGACCAGTCTGTGATCACAACAGCATCTTTGGCAACGTGTATGGACCGGGTCATC
538	aldY	AAGCTTTGCTCGAAGAAACTATGGCTGTGGATGCCGCGATTTTCGGAAAATTTATTCACCAGGGACAAATCTGTATGATGTATGGACCGGGTCATC
539	aldY	AAGCTTTGCTCGAAGAAACTATGGCATGCTCACCAATCCAATCCCGAGATTAATCAGCTTTACAGGGTCAACAGCAGTCTGTATGGACCGGGTCATC
540	aldY	AAGCTTTGCTCGAAGAAACTATGGAACAAACGATTGCGATTTTAGATGAAGCCATGACGTATACTGGTGAATTAGGCGGCGTCTGTATGGACCGGGTCATC
541	aldY	AAGCTTTGCTCGAAGAAACTATGCTTGAGGATGCGTTTGACATTGCACAGAAAGCCCAAAAAGAGTGGGCCAAGAGCACTGTATGGACCGGGTCATC
542	aldY	AAGCTTTGCTCGAAGAAACTATGACATCATTATGATGATCGCCCGCGAAACTGGCGGAACGATCATTAAATCAACAATTGTATGGACCGGGTCATC
543	aldY	AAGCTTTGCTCGAAGAAACTATGAACGTTAAACAAAAGTTTTATCAACGGAAAATGGACTGGGGGAGAAAGCGGACGTACGGATGTATGGACCGGGTCATC
544	aldY	AAGCTTTGCTCGAAGAAACTATGAACGACCAGTCCGTCAATGATTCGCCGAATATTGCCTTTGGCGGAAACAAAGCAAGTGTATGGACCGGGTCATC
545	aldY	AAGCTTTGCTCGAAGAAACTATGAACCATTATTAAAGCTGGCAGCGACCAGGAAGCGATTGACATGGCAAATGATACTGAATGTATGGACCGGGTCATC
546	aldY	AAGCTTTGCTCGAAGAAACTATGAAATCGAGAAAGCGCTGGAGATCATTGAGCAGGCAAAGACAGACGGCATTGAGCTTTGTATGGACCGGGTCATC
547	aldY	AAGCTTTGCTCGAAGAAACTATGAAAGAGGTGCCATCCGACATTGAAGGGAAAACCAATAAGATTTACCGCCTTCCGCTATGTATGGACCGGGTCATC
548	alkA	AAGCTTTGCTCGAAGAAACTATGTGTTGGGGAGTTTTAGGGCAACAAATTAACTTAGCCTTCGCGTACTCCTTAAAGAAGCAATGTATGGACCGGGTCATC
549	alkA	AAGCTTTGCTCGAAGAAACTATGTGTCATTACATTACCTGAAATTTTCGACATGAATGCGAACCTTGGCTACCTAACCAGGGATGTATGGACCGGGTCATC
550	alkA	AAGCTTTGCTCGAAGAAACTATGTGGCGATTCTATTGAATGGAATGGTAAAAAGTATTGGGTGTTCCCACCGTACGAGCGAATTGTATGGACCGGGTCATC
551	alkA	AAGCTTTGCTCGAAGAAACTATGTGCACGGTTAACCCCTACCGACCTGGCAGATATTAAAATGACGGTGAAAAAAAGTGAATGTATGGACCGGGTCATC
552	alkA	AAGCTTTGCTCGAAGAAACTATGTGAACTTTAAAGATGCTGAAAAAAACTTAATTAAAATACGAGGAATCGGTCCTTGGACAGTGTATGGACCGGGTCATC
553	alkA	AAGCTTTGCTCGAAGAAACTATGTCGGTTCCATGGAAAGAATGGCAATCATACGCTACCTTTTATTTATGGCGTGTCCTTTTGTATGGACCGGGTCATC
554	alkA	AAGCTTTGCTCGAAGAAACTATGTCATTGGAATAGCCAGATTAATGGCAAGTGGAGAATTATCGAGGGAAAAATTAATGAAAATGTATGGACCGGGTCATC
555	alkA	AAGCTTTGCTCGAAGAAACTATGTCATTCGATAAAAATATTACGTAATATGAACCGAAAGCCTACGAAAGATGAAATCTTAGATGTATGGACCGGGTCATC
556	alkA	AAGCTTTGCTCGAAGAAACTATGTCATTACAAAAGTTATAGCCATTGGGGAAATTCGGTCCTTAGTGCAGGTAAGCGTAATCATGTATGGACCGGGTCATC
557	alkA	AAGCTTTGCTCGAAGAAACTATGCCAATTATGTTCTAATGCGCTGCCTTAGGTTCCCGACAGCTTTTCCAATCGATGATGTGTATGGACCGGGTCATC
558	alkA	AAGCTTTGCTCGAAGAAACTATGCAAATGATTGTTCAATTCCTAAACGATTCTAGACCTGTTGAGCAGTGGAAACGGGAAGAGTGTATGGACCGGGTCATC
559	alkA	AAGCTTTGCTCGAAGAAACTATGAAGCAGATCCATTACTTAAAATGCCTGCCCGAAAATTTTATGGGTTGCGAGTGATCGGTGTATGGACCGGGTCATC
560	alkA	AAGCTTTGCTCGAAGAAACTATGAAATATATTCATGAATGGTTTGATCTTGATAACGATTTAACTCCATTTTATGAAATGGCATGTATGGACCGGGTCATC
561	alr	AAGCTTTGCTCGAAGAAACTATGTCATTTTCATCTGAAGGTCGATACGGGGATGAACAGACTTGGTGTAAAAACAGAGGAAGATGTATGGACCGGGTCATC
562	alr	AAGCTTTGCTCGAAGAAACTATGGTATGACGTGACCTTAACAGGTTATTCTGTTGAATGGCTTCAGGAGGCAGCCCGCTGTATGGACCGGGTCATC
563	alr	AAGCTTTGCTCGAAGAAACTATGGCTGACATGTCGGACGAGATACCGTTTCAGCTGCGTCCGGCATTTACCCTGCATTTGTATGGACCGGGTCATC
564	alr	AAGCTTTGCTCGAAGAAACTATGGCGCTTTAAAGAGCTGATTGCTCCGCTGCCGTTAAAGAATCTAATGGTCCACTGCTGTATGGACCGGGTCATC
565	alr	AAGCTTTGCTCGAAGAAACTATGGAAGGCTCGAAACCATTAACTATGAGGTGGCCTGTACAATAAGTTCCCGTGTTCCCCGTTGTATGGACCGGGTCATC
566	alr	AAGCTTTGCTCGAAGAAACTATGGAAAAAAGGCTTTTTTAATGCAGTCAGATTCGGCATCGGCATGTATGGCCTTCGCTGTATGGACCGGGTCATC
567	alr	AAGCTTTGCTCGAAGAAACTATGCTCCGAAAATTGAAAGGGACCGACATCCTTGTGAAGGGAAAACGCCTGAAAATTGTGTATGGACCGGGTCATC
568	alr	AAGCTTTGCTCGAAGAAACTATGCCTTTTTACAGAGATACGTGGGCGGAAATTGACTTGTCCGCGATAAAGGAAAATGTCAGCTGTATGGACCGGGTCATC
569	alr	AAGCTTTGCTCGAAGAAACTATGCAGAACGTGATGGCAATTCTTGACCGCAACCCTCGTTTAAAGTGCAAAGGGGTATTTACTGTATGGACCGGGTCATC
570	alr	AAGCTTTGCTCGAAGAAACTATGATGGTGATGCAGAAACAGCAAAGGCTGCTCTTGACGCAGGTGCTTCATGCTTGGCTGTATGGACCGGGTCATC
571	alr	AAGCTTTGCTCGAAGAAACTATGAGCCGAGTACACAGCGGAAAAAGACACATGGATCGGGACGGTGCCTGTAGGCTATTGTATGGACCGGGTCATC
572	alr	AAGCTTTGCTCGAAGAAACTATGACCAATTTATGGTGGAGCTGGATCAGGAATATCCGCCGGGCACAAAAGTCACATTAATAGTGTATGGACCGGGTCATC
573	alr	AAGCTTTGCTCGAAGAAACTATGAAAAGGGATTGAAGGCGCCTATATTGGTGCTTGGCGCGGTTCCCCCGGAGTATGTTGTATGGACCGGGTCATC
574	alr	AAGCTTTGCTCGAAGAAACTATGAAAAACATATCGGTGAACATGTCCACTTGATGGCAGTTGTGAAAGCAAACGCCTACGTGTATGGACCGGGTCATC
575	alsD	AAGCTTTGCTCGAAGAAACTATGTGCAGACAAGAACAGTAGAACTTCAAGAAAAACCTTACGTGCCAATGGTTGAAGCGGTCATGTATGGACCGGGTCATC
576	alsD	AAGCTTTGCTCGAAGAAACTATGTCAAGTGCTCAGCCGTGGTCAAAAAGATCAGCCTGTGAGCCAGATTTATCAAGTATCAATGTATGGACCGGGTCATC
577	alsD	AAGCTTTGCTCGAAGAAACTATGGCGGACACGTTTTTGACTATGTGCTTGAGGATTGCACGGTTACGATTTCTCAAAAAATGATGTATGGACCGGGTCATC
578	alsD	AAGCTTTGCTCGAAGAAACTATGGAGATCAACAGCATGCTGCCAAGCAGAAACTTATTTTATGCAATTCGCATTGACGGATGTATGGACCGGGTCATC
579	alsD	AAGCTTTGCTCGAAGAAACTATGCGACACCGGTCCAAAATGGAGACCGTTCACCGTTCTGTTCATTTACGTTCTTTACACTGTATGGACCGGGTCATC
580	alsD	AAGCTTTGCTCGAAGAAACTATGCGACAACGTGAGAGGAACGATTGTAGGTTTCTTGACACCAGCTTATGCAAACGGAATCTGTATGGACCGGGTCATC
581	alsD	AAGCTTTGCTCGAAGAAACTATGCATGAATCTCAGACTTCCGAACACAGCGGATTTCTTTAATGCGAATCTGGATAACCCTGATGTATGGACCGGGTCATC
582	alsD	AAGCTTTGCTCGAAGAAACTATGCAGAGATTCCGAAATATGGAGACTTCGGTATCGGAACCTTTAACAAGCTTGACGGAGAGCTGTATGGACCGGGTCATC
583	alsR	AAGCTTTGCTCGAAGAAACTATGTTACTTATCGAAAAATGGACCAAATACAGCTTAATGCAGAATGGGTTATCGCTTACCGCATGTATGGACCGGGTCATC
584	alsR	AAGCTTTGCTCGAAGAAACTATGTCTCAGCCAGCAGATCAAACAGCTGGAGGAAGAAGTCGGAGTTACGCTTCTGAAAAGTGTATGGACCGGGTCATC
585	alsR	AAGCTTTGCTCGAAGAAACTATGTCCTCGTCTAGGCAGCAGGAGGAGCTACTAAAGGGCAACATTGATATTGGTATACTTCATGTATGGACCGGGTCATC
586	alsR	AAGCTTTGCTCGAAGAAACTATGGCTAAAGAAGCATGGCCTACTCTATACATGGATTTTATTCAGTTCTGTGAACAAGCGGGCTGTATGGACCGGGTCATC
587	alsR	AAGCTTTGCTCGAAGAAACTATGGCGGCGAGCAAGGCCTTCTCGTAATCGGTTTTGTCGGATCAGCTACATATGAATTTGTATGGACCGGGTCATC
588	alsR	AAGCTTTGCTCGAAGAAACTATGGATTTGTCGAGCTTACCGCAGCAGGAGAAATCTTTTTAAATCATTGCCGCATGGCTGTATGGACCGGGTCATC
589	alsR	AAGCTTTGCTCGAAGAAACTATGCGCCGATTGTCCGGGAATATCGTAAAAAATTCCCATCTGTGAAAATAGAACTGCGTGATGTATGGACCGGGTCATC
590	alsR	AAGCTTTGCTCGAAGAAACTATGCCTCCCTTACAGCATACAGCTTTACATATCGAAACCGCCCAAAGCAGCCCTTGTGTTGTATGGACCGGGTCATC
591	alsR	AAGCTTTGCTCGAAGAAACTATGCATCTTCAATACTTTATCGCAGTAGCCGAAGAGCTTCATTTCGGAAAGGCTGCCCGTGTATGGACCGGGTCATC
592	alsR	AAGCTTTGCTCGAAGAAACTATGATGGTGATTGGTTTAGTCAGTGCCGGAATTGGTATGACATTTGTTCCTTCCTCGGCTGTATGGACCGGGTCATC
593	alsR	AAGCTTTGCTCGAAGAAACTATGAAGCAACACCCATTGACTTCTAAGGAATCAATTACGATTGAGGATTTAAGAGATGAACCATGTATGGACCGGGTCATC
594	alsR	AAGCTTTGCTCGAAGAAACTATGAAGACAATCATAATCCGCTTATAAAGCATTTTATTCATATTTCAAATTGTCAGCAGACAATGTATGGACCGGGTCATC
595	alsS	AAGCTTTGCTCGAAGAAACTATGTTACAGTAACTTGCGATATCGGTTCGCACGCCATTTGGATGTCACGTTATTTCCGTGTATGGACCGGGTCATC
596	alsS	AAGCTTTGCTCGAAGAAACTATGTGCAGATTGGAAATCAGACAGAGCGCACCCTCTTGAAATCGTTAAAGAGTTGCGTTGTATGGACCGGGTCATC
597	alsS	AAGCTTTGCTCGAAGAAACTATGTCAATCATATCGAACACGATGCTGTGAAAGTGGAATTTGCAGAGCGTGAGCAGAAAATTGTATGGACCGGGTCATC
598	alsS	AAGCTTTGCTCGAAGAAACTATGTAACATTAATGATCAGTAACGGTATGCAAACACTCGGCGTTGCGCTTCCTTGGGCTGTATGGACCGGGTCATC
599	alsS	AAGCTTTGCTCGAAGAAACTATGGTTTAACTGGAAAACCGGGAGTCGTGTTAGTCACATCAGGACCGGGTGCCTCTAATGTATGGACCGGGTCATC
600	alsS	AAGCTTTGCTCGAAGAAACTATGGCTTTCCGCAAGATGTTGTGAATGAAGTCACAAATACGAAAAACGTGCGTGCTGTTTGTATGGACCGGGTCATC
601	alsS	AAGCTTTGCTCGAAGAAACTATGGCTAGAGCAGGCAGATGTTGTTCTGACGATCGGCTATGACCCGATTGAATATGATCCTGTATGGACCGGGTCATC
602	alsS	AAGCTTTGCTCGAAGAAACTATGGAGCAAGGTGTCACACATGTATTTGGCATTCCAGGTGCAAAAATTGATGCGGTATTTTGTATGGACCGGGTCATC
603	alsS	AAGCTTTGCTCGAAGAAACTATGCCGTACATCTGCGGTCGATTTCGGAAATATCGATATCGTGAAATATGCGGAAAGCTTCTGTATGGACCGGGTCATC
604	alsS	AAGCTTTGCTCGAAGAAACTATGCATGAAAGGCGGAAGACCGGAAGCAATTAAAGCGGTTCGCAAGCTTTTGAAAAAGTGTATGGACCGGGTCATC
605	alsS	AAGCTTTGCTCGAAGAAACTATGCACCAATTGTACACATTGTATGGAACGACAGCACATATGACATGGTTGCATTCCAGCAATTGTATGGACCGGGTCATC
606	alsS	AAGCTTTGCTCGAAGAAACTATGAGTGGTTTCTGTCTCTGGTGACGGCGGTTTCTTATTCTCAGCAATGGAATTAGAGACAGCTGTATGGACCGGGTCATC
607	alsS	AAGCTTTGCTCGAAGAAACTATGAGATTTAGAGGATCAATATTTTGGCCGTATCGGTTTGTTCCGCAACCAGCCTGGCTGTATGGACCGGGTCATC
608	alsS	AAGCTTTGCTCGAAGAAACTATGAGATCGTTTAAAACGGACACATCAATCTTTGGATAATGCGGCGCTATTCCAGCCGTGTATGGACCGGGTCATC
609	alsS	AAGCTTTGCTCGAAGAAACTATGAAAACTCGGTCCTGCAGCAGATGATGCAATCAGTGCGGCCATAGCAAAAATCCAAACTGTATGGACCGGGTCATC
610	alsT	AAGCTTTGCTCGAAGAAACTATGTTGGATGTGGGTAGTGGCTGCAGTAGGCATGGCTTCAAGCTTTGTCGAAAGTACATTATGTATGGACCGGGTCATC
611	alsT	AAGCTTTGCTCGAAGAAACTATGTTGAATTTATTAAAACAAGCAAAACATGGCTGAACATTTACCGTATCGCTGTTATTGCTTGTATGGACCGGGTCATC
612	alsT	AAGCTTTGCTCGAAGAAACTATGTGTGTATGGATCTTTATCAGGCTTCCAAATCGTTTGGGATATGGCGGACCTCTTTATGGGTGTATGGACCGGGTCATC
613	alsT	AAGCTTTGCTCGAAGAAACTATGTGCTGGAGCATTGGATGGCGCATTCCATGTAAATAAAATAGTTGTAGCCATAGTTCTGGCTGTATGGACCGGGTCATC
614	alsT	AAGCTTTGCTCGAAGAAACTATGTGCGCTGCTGTCAAACGTTGCTTACAAAGTGTATAAAGATTACGCGAAACAGCGTAAGCATGTATGGACCGGGTCATC
615	alsT	AAGCTTTGCTCGAAGAAACTATGGTCGCTGTTTCACAGCTAATTGTGCCGGTTATGGCAGGCATTTATATTCTTATCGCTTTTGTATGGACCGGGTCATC
616	alsT	AAGCTTTGCTCGAAGAAACTATGGTACAGTGTAACGCCAAAAGGCGACGGCATCCAAGTCACACAGGCTGCTCTTAACTGTATGGACCGGGTCATC
617	alsT	AAGCTTTGCTCGAAGAAACTATGGGTCTTGGTGCCAGATGGCTTGGCATCGTTTTTGCAATCTTAATTACCGTCTCATTTGTATGGACCGGGTCATC
618	alsT	AAGCTTTGCTCGAAGAAACTATGGGCTCATGTATCCCATCCGGCAAAGCAAGGCTTTATTCAAACATTAGGCGTATTTTTCGTGTATGGACCGGGTCATC
619	alsT	AAGCTTTGCTCGAAGAAACTATGCGAAAAACATCCCAGGGCTGAAAAACGCTGAAACATGGGAAGATGAGAAACAAGAAGTGTATGGACCGGGTCATC
620	alsT	AAGCTTTGCTCGAAGAAACTATGACTTTCATCGCAGTCGCAATGTTCTTGTTTGCATTCAGTTCAGTTGTCGGCAACTATGTATGGACCGGGTCATC
621	alsT	AAGCTTTGCTCGAAGAAACTATGACAGCTTTATAAGGTAAGAGACGGGGAGGATTTCCGCGGAGGGCCGGCCTACTATATTCTGTATGGACCGGGTCATC
622	alsT	AAGCTTTGCTCGAAGAAACTATGAATTGTTAAAAATGCTTTAGGTTTTGAACAAGTCGTCGGCGGCGGAATAGGCGGCTGTATGGACCGGGTCATC
623	alsT	AAGCTTTGCTCGAAGAAACTATGAATAAAGGTGTTTCATCTATGCAGGCATTCTTTATTTCGGCCGCATCCCGAGTCGTGTATGGACCGGGTCATC
624	amhX	AAGCTTTGCTCGAAGAAACTATGTGATGATATCGACTATTTGTATGGCGTTCACGTCCGTCCGATCCAGGAAACACAGTGTATGGACCGGGTCATC
625	amhX	AAGCTTTGCTCGAAGAAACTATGTCTGCACGCGAACCCTGAAGTCAGCTGGAAGGAATATGAGACAACTTCATTTTTGAAATGTATGGACCGGGTCATC
626	amhX	AAGCTTTGCTCGAAGAAACTATGTATCTTTCAGCCGGCAGAAGAAAAAGGCGGCGGCGCCTTGAAAATGATAGAAGAAGTGTATGGACCGGGTCATC
627	amhX	AAGCTTTGCTCGAAGAAACTATGGTGAAGGTGCCGAATCTGAAAACAACGATGCTCGGACTAGGCTGCGGGCTCCAGCTGTATGGACCGGGTCATC
628	amhX	AAGCTTTGCTCGAAGAAACTATGGCATTGAAATTGCGGCATTTCTTGTACACAAGCTCGGACTCATTCATATTGACCCGTGTATGGACCGGGTCATC
629	amhX	AAGCTTTGCTCGAAGAAACTATGGCACATGACCTTTGACAGAAATGCGATGTTTACCGGCATTCATATTTTGGCGAACTGTATGGACCGGGTCATC
630	amhX	AAGCTTTGCTCGAAGAAACTATGCTTCTATTCTGCACGGATCAAGCCAGCACATTGAGGGAACGATCATCGGGGAAGAGTGTATGGACCGGGTCATC
631	amhX	AAGCTTTGCTCGAAGAAACTATGCTCACCTGTTGTAGCGGTACGCGCTGATATTGACGCGCTGTGGCAGGAGGTTAACTGTATGGACCGGGTCATC
632	amhX	AAGCTTTGCTCGAAGAAACTATGCGGACACGATTCACATATGACAATGGCATTGGGCACGTTAATGCTGCTAAAAAAACATGTATGGACCGGGTCATC
633	amhX	AAGCTTTGCTCGAAGAAACTATGCAAAGATCGAGCTGCACAAAGAACACAGCCTTCCTGCGGCAACACAAAATAAAGAAGTGTATGGACCGGGTCATC
634	amhX	AAGCTTTGCTCGAAGAAACTATGACAGACCAATGAAGCCATGGAGGCATTAATCGCCGAAACAGAAAGAGCCTGTGAAGTGTATGGACCGGGTCATC
635	amhX	AAGCTTTGCTCGAAGAAACTATGAAGCGATCATGGCAGAAGCCATTACGGAAATCATCGGGGCTGAGCGGCTTGATGACTGTATGGACCGGGTCATC
636	amhX	AAGCTTTGCTCGAAGAAACTATGAAATGACAAAACTGCAAGCCGGCGGTGAAAGCTCTAACATCATTCCAGGAAAAGCTGTATGGACCGGGTCATC
637	amhX	AAGCTTTGCTCGAAGAAACTATGAAAGCTTGAGGATTTAGGGTGCCGGACGCGCACGTTTTCAGACTGCACCGGGGTTTGTATGGACCGGGTCATC
638	amiE	AAGCTTTGCTCGAAGAAACTATGTGCCGGATTGTTCTCAAATGCAGATGATATGGCCATACTGCTGCAAGTCATGTTAAATGTATGGACCGGGTCATC
639	amiE	AAGCTTTGCTCGAAGAAACTATGTGACGAAAATTCCGCTCGATTATCAAACCGGGACAAAACACGTATACAGTGACATTGGATTGTATGGACCGGGTCATC
640	amiE	AAGCTTTGCTCGAAGAAACTATGTACCGGCTGGACGGGGACAGTTACAATTATTGATCCAGCATACAATTTAGGCATCGCTGTATGGACCGGGTCATC
641	amiE	AAGCTTTGCTCGAAGAAACTATGGCATGGGCAATACACGTGACGGCGTTATTCAATTCCCTAACATCCGCACAAACACTGTATGGACCGGGTCATC
642	amiE	AAGCTTTGCTCGAAGAAACTATGGATCCGGAAGAAAATCCGAACGTCTTTGAAGGTGACCAATTTCCAACAGGCAGTTTGTATGGACCGGGTCATC
643	amiE	AAGCTTTGCTCGAAGAAACTATGCTTCGCACAAACAGCAGGCAACTTGATTGAGCCGAAAATCATAAATGCAGAAACTGTGTATGGACCGGGTCATC
644	amiE	AAGCTTTGCTCGAAGAAACTATGCTGCATATTTGCCGGGTTTCAAGGATCAGCCGGGTGACCTCATAAAAGGAAAAGACTGTATGGACCGGGTCATC
645	amiE	AAGCTTTGCTCGAAGAAACTATGCTCCAGCACCAATCAGGGCTCCCATCAAGCTTTTACTTTTACACGCCGGAAAAAGTGTATGGACCGGGTCATC
646	amiE	AAGCTTTGCTCGAAGAAACTATGCCTCAAATACAAAAATGTACGCAACAAATTTTGCATTGCAGCGCTTAGTCAGCCAAGGAATGTATGGACCGGGTCATC
647	amiE	AAGCTTTGCTCGAAGAAACTATGAGCATACCTTGTACAATCCGCTGCAAAAGGGCTTTAAACCGAAACAGTTCGCAGCTACTGTGTATGGACCGGGTCATC
648	amiE	AAGCTTTGCTCGAAGAAACTATGACGGAAGTAAAAGCATGGAATGGATGTTTGGCCCTCATGCCAGCGAAAATGCTTACTGTATGGACCGGGTCATC
649	amiE	AAGCTTTGCTCGAAGAAACTATGACAGTAAAAAGTACGAAGGATCAGAACTGCTGCGCCGTCCGGCCAAAATGAAAACTGTATGGACCGGGTCATC
650	amiE	AAGCTTTGCTCGAAGAAACTATGAAGCTAAGGAAGGTAGATCAGATGATAGAACGGGATATTGCAGCAGGATTTCCAGGCGCCTGTATGGACCGGGTCATC
651	amiE	AAGCTTTGCTCGAAGAAACTATGAACTCACCGGCAAACCGCTTGATGTCTACACGGAGCAAGAGCTCTACAAACCGCTTGTATGGACCGGGTCATC
652	ampS	AAGCTTTGCTCGAAGAAACTATGTTTGTCCGTTTAATTGTAAAACACGCATATGAAAAGGGCGCAAAAAACGTCACCGTGAATGTATGGACCGGGTCATC
653	ampS	AAGCTTTGCTCGAAGAAACTATGTGTGTCGTCGAACCCAGACTTGCTAAAAGGTATAGATTCCAAACGGATTGCGGCATTGTATGGACCGGGTCATC
654	ampS	AAGCTTTGCTCGAAGAAACTATGTCAAGCAGAAGGAACTGATCTAACAATTAAGCTGCCTAGGAAGCATGTTTGGGCAGGTGCTGTATGGACCGGGTCATC
655	ampS	AAGCTTTGCTCGAAGAAACTATGTACATATGCACAGCTGGCGGTAGAAGTCGGCGTTAATGTCCAAAAAGGCCAGTATGTGTATGGACCGGGTCATC
656	ampS	AAGCTTTGCTCGAAGAAACTATGGGAAACAGATGAAGGTTCTCACTATTTAGGTGAAGTGGCACTTGTTCCTTACGATTCGCCTGTATGGACCGGGTCATC
657	ampS	AAGCTTTGCTCGAAGAAACTATGGCGTGAATGAAAGTGGCCATGAGTTTATGGCCAATATGCCGACAGAAGAAGTGTTCTGTATGGACCGGGTCATC
658	ampS	AAGCTTTGCTCGAAGAAACTATGGCAAAAAGACGGGGTTGACGGAGTGGTATCAAGCACAAAACCATTAAGCTACGGCTGTATGGACCGGGTCATC
659	ampS	AAGCTTTGCTCGAAGAAACTATGGATGAAAACGCGTCAAATCATTTGGCGATCGGAAGCGCCTATGCCTTTAATATTGTGTATGGACCGGGTCATC
660	ampS	AAGCTTTGCTCGAAGAAACTATGCTGAATGGGAAGCAAAAGGCAGAGAAGAGCTTGCCAAAAATGGAGCTGCTTTCATTGTATGGACCGGGTCATC
661	ampS	AAGCTTTGCTCGAAGAAACTATGCAGGATGACGAAGTCGCCAAATTAAAATACGAACTTGCGCCGTTTGAAGCATTTGTGTATGGACCGGGTCATC
662	ampS	AAGCTTTGCTCGAAGAAACTATGCACGTGGACTTTATGATCGGTTCTAAGGATATGAATATTGACGGAATTACGGCAGACGGGTGTATGGACCGGGTCATC
663	ampS	AAGCTTTGCTCGAAGAAACTATGAGCGATCCACCTTCTGTGGGAAGAAATTTTTAAAGCGACGCGCGTAAATGAAGACATGTATGGACCGGGTCATC
664	ampS	AAGCTTTGCTCGAAGAAACTATGACAAAGTCAGCTGGACTGTCGTAGGTGCGGCATCAGCAGGCTGGGCTCACAAGGTTGTATGGACCGGGTCATC
665	ampS	AAGCTTTGCTCGAAGAAACTATGAATCATGACCAAAATCTTCATGAAAAAGTTGACCATTTGAACGAGAGACATTACGCTGCCTGTATGGACCGGGTCATC
666	amyC	AAGCTTTGCTCGAAGAAACTATGTGCTGAAGCCGATCACTGCGACCATCTGTATCATTTCTTGTGTCTTTATTTGGAACGACTTGTATGGACCGGGTCATC
667	amyC	AAGCTTTGCTCGAAGAAACTATGGTTATTAATTATATTCGGCTCACTTGCCGCCTACCCGCTTGCCCGGCGGGAAACGTGTATGGACCGGGTCATC
668	amyC	AAGCTTTGCTCGAAGAAACTATGGTAGAAGCCGCAAGAATTGACGGTGCAGGCATGCTGAAAATCTTTTTTACGATTGTGTTTTGTATGGACCGGGTCATC
669	amyC	AAGCTTTGCTCGAAGAAACTATGGCGGCTTACATGCCGTTAACCGTATTCTTATATTCAGGCTTTATCCGATCGACCATTCCATGTATGGACCGGGTCATC
670	amyC	AAGCTTTGCTCGAAGAAACTATGGCCATTGTGGCCTGTGCGCATTTTATTCCTTTTTATATCCTGCTGACCACTTCATTGATGTATGGACCGGGTCATC
671	amyC	AAGCTTTGCTCGAAGAAACTATGCATCTCCTTTCATAATTTTTCAGAGGCGTGGGAGCGCGCTTCGCTAGGAAACTCTTTTATGTATGGACCGGGTCATC
672	amyC	AAGCTTTGCTCGAAGAAACTATGCAAGATCAAAAGGTTCAGACATTAACAGTAGCCATGGCAGGTTTTTTCGGAGAAAACGCATGTATGGACCGGGTCATC
673	amyC	AAGCTTTGCTCGAAGAAACTATGATTTCCATTATGATCATCCCTCCGTTAACGTCCATGGTTCCTTTGTACCGAATGGTCGTGTATGGACCGGGTCATC
674	amyC	AAGCTTTGCTCGAAGAAACTATGATTTAGTTGCCGCAGCGGCACTTATGGCAATGCTGCCGATGGTTGTTCTGTTTTTTGTATGGACCGGGTCATC
675	amyD	AAGCTTTGCTCGAAGAAACTATGTGGTGGATGTACATTCCTGCTTTGCTCTCCGTTCTGGTCTTTATGATTTACCCGTTTGTGTGTATGGACCGGGTCATC
676	amyD	AAGCTTTGCTCGAAGAAACTATGTGATTACCTTTACAAACTGGAACGGATTTTCACAAGTCTACCAATGGGTTGGATTCGCGCTGTATGGACCGGGTCATC
677	amyD	AAGCTTTGCTCGAAGAAACTATGTGATCCTGATACTTGGCATATCTTAAAAAACACGCTGCATTACGGGCTTGGCAGCATGTATGGACCGGGTCATC
678	amyD	AAGCTTTGCTCGAAGAAACTATGTCATTATGGGCTACATTTGGTACTTTTTCTTCTCCTATGACGGAGGCGCGCTCAACGATTTGTATGGACCGGGTCATC
679	amyD	AAGCTTTGCTCGAAGAAACTATGGGCTATGCCGCAACGCAAGGCATATTTATGGCATTTGTCATTTTGATCATCAGCTTGTATGGACCGGGTCATC
680	amyD	AAGCTTTGCTCGAAGAAACTATGGCCAGCAGTTTTTTACCATCACGCTGCCGCTGTTAATGCCCTCCATTACCATTAATTGTATGGACCGGGTCATC
681	amyD	AAGCTTTGCTCGAAGAAACTATGCGGCCCCGGAAATGCGTCACAATCCATGTCCACGTTTATGTATGATTTGTATTTCTGTATGGACCGGGTCATC
682	amyD	AAGCTTTGCTCGAAGAAACTATGCACCTATCAATATGTCGGGATCGCTATGGTTGTCTACTTAGCCGGTCTGCAAAGCATTCCTGTATGGACCGGGTCATC
683	amyD	AAGCTTTGCTCGAAGAAACTATGATGAGTGAGATCGCAAGGGACGTTCATGTGAAACAGGTTAAGCCAAAAAAGCAGTCCTGTATGGACCGGGTCATC
684	amyD	AAGCTTTGCTCGAAGAAACTATGATCAGCCCTATTAATGCGCTCGCCAGTCCCTCGCTCAATCCATGGATCATTGTCATTGTATGGACCGGGTCATC
685	amyD	AAGCTTTGCTCGAAGAAACTATGAAGCATTAAAACGAAAGCGGTAACAAGAACAATTGTGTATTTGCCGGTGATGATCAGCCCTGTATGGACCGGGTCATC
686	amyE	AAGCTTTGCTCGAAGAAACTATGTTGAATTGACCGGATCTTGGCCTGGAAAACCAATGACTAAAAATGCAGACGGAATTTACATGTATGGACCGGGTCATC
687	amyE	AAGCTTTGCTCGAAGAAACTATGTGACATGGGTAGAGTCGCATGATACGTATGCCAATGATGATGAAGAGTCGACATGGTGTATGGACCGGGTCATC
688	amyE	AAGCTTTGCTCGAAGAAACTATGGGAAGGGAATCAAGGAGATAAAAGCATGTCGAACTGGTACTGGCTGTATCAGCCGACATGTATGGACCGGGTCATC
689	amyE	AAGCTTTGCTCGAAGAAACTATGGAAACGGTTCTTAGACAGGGCATTGAATGACGGGGCAGACGGTTTTCGATTTGATTGTATGGACCGGGTCATC
690	amyE	AAGCTTTGCTCGAAGAAACTATGCTTTCAATGATCAACTGACGATTACCTTGCGTGCAGATGCGAATACAACAAAAGCCGTTGTATGGACCGGGTCATC
691	amyE	AAGCTTTGCTCGAAGAAACTATGCTGACGCTGCCTGCGGACACGGATACAACCAACGCAAAAGTGATTTTTAATAATGTGTATGGACCGGGTCATC
692	amyE	AAGCTTTGCTCGAAGAAACTATGCCTGCAGGATAGTGCCTCCAGAGATGCTGCATATGCGAATTATATGGATGTGACAGCTGTATGGACCGGGTCATC
693	amyE	AAGCTTTGCTCGAAGAAACTATGCAATGCCAGGTCTGTAGCTGTGCTTTATCCTGATGATATTGCAAAAGCGCCTCATGTTTTTGTATGGACCGGGTCATC
694	amyE	AAGCTTTGCTCGAAGAAACTATGATGGCTGGACAGCCTGAGGAACTCTCGAACCCGAATGGAAACAACCAGATATTTATGTGTATGGACCGGGTCATC
695	amyE	AAGCTTTGCTCGAAGAAACTATGATGCAGGTTCATCCTCTGTCTCTATCAATACGGCAACAAAATTGCCTGATGGCAGGTTGTATGGACCGGGTCATC
696	amyE	AAGCTTTGCTCGAAGAAACTATGATAAAGGTCATTGTTGACGCGGTCATCAATCATACCACCAGTGATTATGCCGCGATTGTATGGACCGGGTCATC
697	amyE	AAGCTTTGCTCGAAGAAACTATGAGCTTCCAGATGATGGCAGTTACGGCAGTCAATTTTGGCCGAATATCACAAATACATCTGTGTATGGACCGGGTCATC
698	amyE	AAGCTTTGCTCGAAGAAACTATGAGAATCGTAATCTGGGCGTGTCGAATATCTCCCACTATGCATCTGATGTGTCTGCGTGTATGGACCGGGTCATC
699	amyE	AAGCTTTGCTCGAAGAAACTATGACAGTGATGGTGTAACGAGGACCGAGAAATACAGTTTTGTTAAAAGAGATCCAGCGTCGGTGTATGGACCGGGTCATC
700	amyE	AAGCTTTGCTCGAAGAAACTATGACACATGGAAACACACAAATTAAAAACTGGTCTGATCGATGGGATGTCACGCAGAATTCATGTATGGACCGGGTCATC
701	amyX	AAGCTTTGCTCGAAGAAACTATGTGAAAGAGAAAGCAACTAAGGCAAAGCCCGGAATCCTGCTTTTTGGAGAAGGGTGTGTATGGACCGGGTCATC
702	amyX	AAGCTTTGCTCGAAGAAACTATGTCAGAAAGAAGGATGGCAAGAAAATTCATTGCGGATTGCGTGGTCTATTGGCTTGTGTATGGACCGGGTCATC
703	amyX	AAGCTTTGCTCGAAGAAACTATGTACAAGTACGTCTGCGTATCCGACCATCCTGTGACATTTGGAAAAATCCATTGCGTCTGTATGGACCGGGTCATC
704	amyX	AAGCTTTGCTCGAAGAAACTATGGATCATACCGTATTTAAAGTATGGGCGCCTGCTGCAACCTCAGCTGCTGTCAAGCTTGTATGGACCGGGTCATC
705	amyX	AAGCTTTGCTCGAAGAAACTATGGAATGCCGGGCATCGGCTTTTTTAATGATATGTTTCGTGACGCTGTAAAAGGGAATGTATGGACCGGGTCATC
706	amyX	AAGCTTTGCTCGAAGAAACTATGGAAATGGACTGCTCCTCTTAAACCATTCTCACACCCTGTGGATGCCGTCATCTATGATGTATGGACCGGGTCATC
707	amyX	AAGCTTTGCTCGAAGAAACTATGGAAAGATATCATTGTTATCCATCACGCGAGTCCAGACTCCGTCGAGTGGAGGCTGTGTATGGACCGGGTCATC
708	amyX	AAGCTTTGCTCGAAGAAACTATGCTGCAACAATTCAGAATGGATGGAAACAGTTGACCAGTATGCCAAGGCTGTGACTGTTGTATGGACCGGGTCATC
709	amyX	AAGCTTTGCTCGAAGAAACTATGCGGCATGATAAACAAGGGAAAATACTTAGCGCTGACGGAAACTGATACACAAACCGCAAATGTATGGACCGGGTCATC
710	amyX	AAGCTTTGCTCGAAGAAACTATGCGCAGCTTCGAAGCGTATGTCGATGACATGAATATCATTACTGTTCTGATTCCTGCTGAATGTATGGACCGGGTCATC
711	amyX	AAGCTTTGCTCGAAGAAACTATGAGGAATTTTTCCGGACGAAGCAGGGAGTGGAAAACAGCTATCAATCCAGTGACAGCTGTATGGACCGGGTCATC
712	amyX	AAGCTTTGCTCGAAGAAACTATGAGACATCCAGCGCCATCTTGAATGCTTGACGCTAAAAGAACACCTTATCGCATACAGGTGTATGGACCGGGTCATC
713	amyX	AAGCTTTGCTCGAAGAAACTATGACAAATGATCAATACCCTGCATCAGCACGGTCTGCGAGTCATTCTGGATGTTGTTTTTATGTATGGACCGGGTCATC
714	amyX	AAGCTTTGCTCGAAGAAACTATGAAGGCATTAGCACCGATTGTTCCGGAACCAAGCCAGTCCATCAATTATGTCGAATTGTATGGACCGGGTCATC
715	amyX	AAGCTTTGCTCGAAGAAACTATGAAAGAAGATGTTCACTATATCCGCAGGCTGATCTCGCTGAGAAAAGCGCATCCTGCTGTATGGACCGGGTCATC
716	ansA	AAGCTTTGCTCGAAGAAACTATGTCCTGTCGTCAAGAGAATTATGGAAACGCCGATAGCTGATGACGTTGTCCTGTAATGTATGGACCGGGTCATC
717	ansA	AAGCTTTGCTCGAAGAAACTATGTATGAACACAGAAGCAATTGTGCCAAAATTGATGTGGGCGCTAGGTCAGTCTTCGTGTATGGACCGGGTCATC
718	ansA	AAGCTTTGCTCGAAGAAACTATGGTTTATGTTGTGTTTGACGGCAGAGTCATTCAGGGAACGCGTGCGATCAAATTAAGATGTATGGACCGGGTCATC
719	ansA	AAGCTTTGCTCGAAGAAACTATGGACGGGATCGAATACAACAAACAAGTAACGGAACCTGAGAACGACACCTTCACAGTTGATGTATGGACCGGGTCATC
720	ansA	AAGCTTTGCTCGAAGAAACTATGGAAGGCGAAGACATGAGCATTTACGAGGTTGGCCGCAGAGTCAACCAAGACTTAATTTGTATGGACCGGGTCATC
721	ansA	AAGCTTTGCTCGAAGAAACTATGCGATTACACAATGGAAACTCAGTCGCTTATGAATATAGACAGCACCAATATGCAGCCTGATGTATGGACCGGGTCATC
722	ansA	AAGCTTTGCTCGAAGAAACTATGCATCCAGGCTTAAAGCCCGAAATGTTTGATGCCCTGAAAAGCATGTACAAAGGAATTGTGTATGGACCGGGTCATC
723	ansA	AAGCTTTGCTCGAAGAAACTATGCACGGTACAGATACAATGGCCTATACATCTGCCGCACTATCGTATATGCTGCAGCATGCTGTATGGACCGGGTCATC
724	ansA	AAGCTTTGCTCGAAGAAACTATGATACTGGGTGGAAATAGCAGAAGCCGTTAAGGAAAATTATGATGCCTATGACGGGTTTGTTGTATGGACCGGGTCATC
725	ansA	AAGCTTTGCTCGAAGAAACTATGAGTTGAAGGGGAAAATGGGCTGGCTCCCGGAGTCAAGGCTGATGAATTATTAAGTTACGTTGTATGGACCGGGTCATC
726	ansA	AAGCTTTGCTCGAAGAAACTATGAGAGACATTTTGTCAAAAGTGAATGAACTGATCGAAAGCGGCATTGTCGTCGTCATTACGTGTATGGACCGGGTCATC
727	ansA	AAGCTTTGCTCGAAGAAACTATGACCGGCTCGCAGATTCCGATCACGTTCCAAAAAACCGATGCCAAAAAAAATATTACTGTATGGACCGGGTCATC
728	ansB	AAGCTTTGCTCGAAGAAACTATGTCCGTTCGTTCACTGACAACTGCTTAAAAGGCATTGAAGCCAACGAAAAGCGTATGTGTATGGACCGGGTCATC
729	ansB	AAGCTTTGCTCGAAGAAACTATGGTATCAGCTTCATTAAAAGTCTGCATGATGAACATGTCGAAGATCGCAAACGACCTGCGTGTATGGACCGGGTCATC
730	ansB	AAGCTTTGCTCGAAGAAACTATGGTAGAAAAAAGCGCAGGCGTGATCACAGCTGTCAATCCGCATCTTGGGTATGAAGTGTATGGACCGGGTCATC
731	ansB	AAGCTTTGCTCGAAGAAACTATGGGCGCAACTGCTGTTGGTACAGGGCTGAACGCTGATCCTGAATATATCAAACAGGTAGTATGTATGGACCGGGTCATC
732	ansB	AAGCTTTGCTCGAAGAAACTATGGAAAGTCAATCCGGTTATGGCGGAGCTGATCAACCAAATTGCGTTCCAGGTTATCTGTATGGACCGGGTCATC
733	ansB	AAGCTTTGCTCGAAGAAACTATGCTATCGTACAAGCCGCTGACGAGATTCTGGAAGGCAAGTGGCACGATCAGTTTATCTGTATGGACCGGGTCATC
734	ansB	AAGCTTTGCTCGAAGAAACTATGCTAGAATTGCCAGGGAAGCAATTATGACAGGGCAATCTGTCCGGGATCTTTGTCTGTGTATGGACCGGGTCATC
735	ansB	AAGCTTTGCTCGAAGAAACTATGCCTCTTGTCGGCGCTGATCATCTTGTTGATGCGACACAAAATACAGATGCCTATACAGTGTATGGACCGGGTCATC
736	ansB	AAGCTTTGCTCGAAGAAACTATGCCAAACACACATGTGAACATGTCACAGTCTACGAACGATGTGTTCCCGACTGCTATCTGTATGGACCGGGTCATC
737	ansB	AAGCTTTGCTCGAAGAAACTATGAGTTGAACGTCATGGAGCCCGTGCTTGTCTTTAATTTGCTTCAATCCATCAGCATCTGTATGGACCGGGTCATC
738	ansB	AAGCTTTGCTCGAAGAAACTATGAGGAGTTTGACTCTGTTATTAAAATGGGCCGGACACACCTTCAAGATGCGGTTCCGTGTATGGACCGGGTCATC
739	ansB	AAGCTTTGCTCGAAGAAACTATGACGGAATTCAGACGCTCCGTGCTTCTGAAAATTTTCCGATCACAGGATACAAAATCCTGTATGGACCGGGTCATC
740	ansB	AAGCTTTGCTCGAAGAAACTATGAATTCGAAGCTTACAGCCGTGTTCTCGAGCGTGATATCAAACGAATCAAGCAATCGTGTATGGACCGGGTCATC
741	ansB	AAGCTTTGCTCGAAGAAACTATGAACTTCTATGAACATGAACGCGAATGAGGTTATCGGAAACCGGGCGCTTGAAATCTGTATGGACCGGGTCATC
742	ansR	AAGCTTTGCTCGAAGAAACTATGGCCGCTGAGTGAAGATGAAATCATCCAGCTGATTACCTTTATACGCACAAAAAGAAAAGTTGTATGGACCGGGTCATC
743	ansR	AAGCTTTGCTCGAAGAAACTATGCTGACCTCTTTGACACAACCTGCGATGAACTTTTAGGCCGCGAGAAACAAAAGCAGTGTATGGACCGGGTCATC
744	ansR	AAGCTTTGCTCGAAGAAACTATGCTCAGGCCATAGAATTGGCCACGTGGAGCAGCCTCGACTTTACCATTTCTGTTGATTGTATGGACCGGGTCATC
745	ansR	AAGCTTTGCTCGAAGAAACTATGCAATATACAGCTGACCTTCTCGGTATCGCAAAAAGCACATATGCCGGCTACGAGTCAGGTGTATGGACCGGGTCATC
746	ansZ	AAGCTTTGCTCGAAGAAACTATGTTGCGCTTACCAAAACAAATGATCCTCAAAAAATCCAAGCTTATTTCAATGAGTATTGATGTATGGACCGGGTCATC
747	ansZ	AAGCTTTGCTCGAAGAAACTATGTTAACGACCGGATTGCCTCAGCCCGATATGTCACCAAAACAAACACAACTACAACAGATTGTATGGACCGGGTCATC
748	ansZ	AAGCTTTGCTCGAAGAAACTATGTGTTTTTACCGGATGTTCACATTCTCCTGAAACAAAAGAATCCCCGAAAGAAAAAGCTCATGTATGGACCGGGTCATC
749	ansZ	AAGCTTTGCTCGAAGAAACTATGTGCAAACGTCAGCGGCGAGCAGATTGTTAACGTCGGCAGCACAAATATTGATAATAAAATTGTATGGACCGGGTCATC
750	ansZ	AAGCTTTGCTCGAAGAAACTATGTGATGTAGACGGAATCGTCGTGACTCATGGAACAGATACATTGGAGGAAACCGCTTTGTATGGACCGGGTCATC
751	ansZ	AAGCTTTGCTCGAAGAAACTATGTATAAAGCAGGTGTTGTCGGCGTTGAATCACTGATCGAGGCAGTTCCAGAAATGAAGTGTATGGACCGGGTCATC
752	ansZ	AAGCTTTGCTCGAAGAAACTATGGTACAATGCAGTGAAAGTGGCAGGTGCCCCTGAGGCAAAAGGGAAAGGGACGCTTTGTATGGACCGGGTCATC
753	ansZ	AAGCTTTGCTCGAAGAAACTATGGTAAAAGCCGGAGCAAAGGGGATTGTATTTGCCGGTTCTGGGAACGGGTCTTTATTGTATGGACCGGGTCATC
754	ansZ	AAGCTTTGCTCGAAGAAACTATGGAAGGACACGGATTTCTCGGTTTCTAATCTTGATGAGCTGCCGCAGGTTGACATTTGTATGGACCGGGTCATC
755	ansZ	AAGCTTTGCTCGAAGAAACTATGCTTACCGTGAAAAGTGATAAACCGGTTGTTATTGTCGGTTCGATGAGACCTTCCACAGCCTGTATGGACCGGGTCATC
756	ansZ	AAGCTTTGCTCGAAGAAACTATGCATTTAAATCAGAAGAAATGGGCTTCGTCGGAACAATTGCAGATGATATCTATTTTTGTATGGACCGGGTCATC
757	ansZ	AAGCTTTGCTCGAAGAAACTATGATCTGCCAAACATTAGAATTTTAGCGACAGGAGGCACGATAGCTGGTGCCGATCAATTGTATGGACCGGGTCATC
758	ansZ	AAGCTTTGCTCGAAGAAACTATGAGTCAAAAAAGGCGTTACAGTGGTGCGCTCTACCCGCACGGGAAATGGTGTCGTCTGTATGGACCGGGTCATC
759	ansZ	AAGCTTTGCTCGAAGAAACTATGAAAAGGACTTGCTGGCATCGAACTCTTTAAACCCCCAAAAAGCACGGATGTTGCTTGTATGGACCGGGTCATC
760	antE	AAGCTTTGCTCGAAGAAACTATGTTTTTGTTCTCCAGAAGACTCTGGCCGGGCTCCGGAATGGACTGTTATATCATCTGTGTATGGACCGGGTCATC
761	antE	AAGCTTTGCTCGAAGAAACTATGTGTCAGCAAGGTGAGAAACCGACTCGGCAAAAGAATAGCCTTCCATCTGCCTTAATGTATGGACCGGGTCATC
762	antE	AAGCTTTGCTCGAAGAAACTATGAGAAAACATTGCCGCCCGCTCCGCAGCCAAAGCAATGAAAAATCTGTTTGTCGGGTGTATGGACCGGGTCATC
763	antE	AAGCTTTGCTCGAAGAAACTATGACGAAGGTGTGCTTTCTCCATGAAAAGGACAGAGTCCAAAGTAGTTTCGGCCTTGCTTCTTGTATGGACCGGGTCATC
764	appA/1	AAGCTTTGCTCGAAGAAACTATGTTACAAGGGAGAACGCGGTTCAACATATGAAATGCTGAAATCCGTAGAAAAAAAGTGTATGGACCGGGTCATC
765	appA/1	AAGCTTTGCTCGAAGAAACTATGTGTGAAATTGTCACTCGCTGAAAGCATTAAAGAATTAGACGGCGGCCTTGCATATGATGTGTATGGACCGGGTCATC
766	appA/1	AAGCTTTGCTCGAAGAAACTATGGCGGGGATTTGGTTGTTGGTTCAATCGGAGAACCCACACTTTTTAACTCTCTGTATTCTGTATGGACCGGGTCATC
767	appA/1	AAGCTTTGCTCGAAGAAACTATGGACGGAAAACCGCACTGATGATGCTAAGTGTATTGATGGTTCTGGCCATCTTTTTATCATGTATGGACCGGGTCATC
768	appA/1	AAGCTTTGCTCGAAGAAACTATGCGGAAAAGAACTGACTGCAGACGACGTCGTATTTACGTACAGTGTCCCTTTAAGCAAAGATGTATGGACCGGGTCATC
769	appA/1	AAGCTTTGCTCGAAGAAACTATGCCTGCTCGGGATCAAAATCAAGCAACAGCAGCGCGAAAAAATCAGCAGGCAAACCTGTATGGACCGGGTCATC
770	appA/1	AAGCTTTGCTCGAAGAAACTATGCCGATGACGCAAGTACGGATATTGAAAATATGCTGTACAGCTTTTTAACGAAAACGGATGTGTATGGACCGGGTCATC
771	appA/2	AAGCTTTGCTCGAAGAAACTATGTTGGAACTATCCTAAAGATATAGATGTTCCGAAATTTGAGTACAACGAGAAAAAAGCGAATGTATGGACCGGGTCATC
772	appA/2	AAGCTTTGCTCGAAGAAACTATGTTGCGGAAGATCAGCCGTATACGTTCTTGTATTATCCTAACAACCATATGGCAATGCCGGTGTATGGACCGGGTCATC
773	appA/2	AAGCTTTGCTCGAAGAAACTATGTGGGATGGAGTTTATCCACATTCCCGGATCAATATGATATTTTCCATTCAAGCCAGATGTATGGACCGGGTCATC
774	appA/2	AAGCTTTGCTCGAAGAAACTATGTGCCGAAGCGGATAAACTCATGAAAGATGCAAAATCAATCAGTGACAGAAAGCAGTGTATGGACCGGGTCATC
775	appA/2	AAGCTTTGCTCGAAGAAACTATGTGAGTTTAACAGAAAGAAACCAATCGGTTCAGGACCATTTAAGTTTAAGGAATGGAAGCATGTATGGACCGGGTCATC
776	appA/2	AAGCTTTGCTCGAAGAAACTATGTGAAGTGAAAACCCAGATCGTTGAATGGAGCGCTCTCGTTGAACAAATGAATCCTTGTATGGACCGGGTCATC
777	appA/2	AAGCTTTGCTCGAAGAAACTATGTCAACAACCTAAAAATCGTTACTGATTTGGCATTAAGTTATGTGTACATCGGGTGGAATGTGTATGGACCGGGTCATC
778	appA/2	AAGCTTTGCTCGAAGAAACTATGGCTTGCAGAAGCCGGCTGGAAAGATACGAACGGTGACGGCATTCTGGATAAAGACTGTATGGACCGGGTCATC
779	appA/2	AAGCTTTGCTCGAAGAAACTATGGAAGGATACAAATATCATCCGAAACGTGATTTGTATAATATTGAAAAATGGTGGCTTGCATGTATGGACCGGGTCATC
780	appA/2	AAGCTTTGCTCGAAGAAACTATGGAAATTCTCGTTTACCCTTAAAACGAACCAAGGAAACAAAGTCCGTGAAGACATCGCTGTTGTATGGACCGGGTCATC
781	appA/2	AAGCTTTGCTCGAAGAAACTATGCGAGTCAATCGTCAGCCAAGTATTAGATGGAGACGGCGAGGTAGCTTACATTCCGGTGTATGGACCGGGTCATC
782	appA/2	AAGCTTTGCTCGAAGAAACTATGCAGGCAGGCGATATTAATTTCTTTAATGTGCCCGCCACTGACTACAAAACGGCTGAAAATGTATGGACCGGGTCATC
783	appA/2	AAGCTTTGCTCGAAGAAACTATGCAACAATGCGTTAGACAGCACAGCTATTCTGCCGAAACATATTCTCGGTAATGTTCCGATGTATGGACCGGGTCATC
784	appA/2	AAGCTTTGCTCGAAGAAACTATGAAGCTCGAAGCGAATGATGATTACTTTGAAGGAAGACCGTATTTAGATACTGTGACGTTGTATGGACCGGGTCATC
785	appB	AAGCTTTGCTCGAAGAAACTATGTTTAATTCTGCCTGCATTCGTTCTAGCTACAGCTGACATGGCCGGACTGACGAGATTGTATGGACCGGGTCATC
786	appB	AAGCTTTGCTCGAAGAAACTATGTTACGATTTTATCATTTGTTATCATGAAAGCCGCGCCCGGAGATCCGATGACATTAATGATGTATGGACCGGGTCATC
787	appB	AAGCTTTGCTCGAAGAAACTATGTATGGCAAGACTACCCAATACGCTCCTGCTGATGCTGGTTTCAACGATTTTGGCTTGTATGGACCGGGTCATC
788	appB	AAGCTTTGCTCGAAGAAACTATGTAAATCTCGGCTGGTTTCCAACTGGGGGTGTCGAGACACTGAATACCGAATTCAATTGTATGGACCGGGTCATC
789	appB	AAGCTTTGCTCGAAGAAACTATGGGACCCGAAAATCAGCCAGGCTGACAGAGAGCAGTTTATTGAAAAATACGGTCTGAATGATGTATGGACCGGGTCATC
790	appB	AAGCTTTGCTCGAAGAAACTATGGCACAGCGAGAGCAAAAGGATTTAAAGAGAACAGAGTGCTATTTAAACATGGATTGAGGATGTATGGACCGGGTCATC
791	appB	AAGCTTTGCTCGAAGAAACTATGGATTATCCGGTTATCATGGCAATGACTGTGATCTCGGCGGTTCTTGTCGTTGTCGTGTATGGACCGGGTCATC
792	appB	AAGCTTTGCTCGAAGAAACTATGCGGATCTGTCGTTGTCGAACAAATTTTCACTTGGCCGGGATTAGGAAAGCTGTTTTGTATGGACCGGGTCATC
793	appB	AAGCTTTGCTCGAAGAAACTATGCGACTATGGCATTACATTTACCTCGTTTATAGGCCTGGCTATTCCAAACTTTTGGTTTGGTGTATGGACCGGGTCATC
794	appB	AAGCTTTGCTCGAAGAAACTATGCCTCAGTACGTTCAATATTTAAAGTGGCTAGGCAACATGGTGCAGGGTGATTTCGGAACGTGTATGGACCGGGTCATC
795	appC	AAGCTTTGCTCGAAGAAACTATGTTCCCGGGCTATTTATTTTAATGACCGTTTTATGCTTCAACTTTGTCGGTGATGGCCTGCTGTATGGACCGGGTCATC
796	appC	AAGCTTTGCTCGAAGAAACTATGTGACAAAGATTTTCTGGGAAAAATTCTCGAAAAACAAACTGGCCATTTTAGGTGCCGTTTGTATGGACCGGGTCATC
797	appC	AAGCTTTGCTCGAAGAAACTATGTCGCTAGCTGGGGGAACATGCTTCAAGACGCACAGAATTTCACAGTAATGATTCAAGTGTATGGACCGGGTCATC
798	appC	AAGCTTTGCTCGAAGAAACTATGTATTATGTCTGCTGTTTTCGCCCCTTTAATTGCACCTTATCCCCAAGAGCAGCAAAGCCTTGTATGGACCGGGTCATC
799	appC	AAGCTTTGCTCGAAGAAACTATGTATATGGAGCGCGTGTCTCTTTATTGGTTGGATTTGCGTCCGTAGTCGGTTCGATTTTTGTATGGACCGGGTCATC
800	appC	AAGCTTTGCTCGAAGAAACTATGTAAATATAAGGCGCCGGGCCTTGAACATCTGATGGGAACGGATAAATTTGGACGTGATATTGTATGGACCGGGTCATC
801	appC	AAGCTTTGCTCGAAGAAACTATGGGAACGGTTTTAGGAGCATTAGCCGGATATTTCAGAGGAATAGTGGATGCTGTCATTATGTGTATGGACCGGGTCATC
802	appC	AAGCTTTGCTCGAAGAAACTATGGATATTTTCTTGTTGATCACGCTGGTCACCATCTTCAAGCCGGGTGTGGACAAATTTGTATGGACCGGGTCATC
803	appC	AAGCTTTGCTCGAAGAAACTATGCTCACAGGATGGACCACAACAGCACGATTAGTAAGGGGAGAATTCTTGTCGCTCCTGTATGGACCGGGTCATC
804	appC	AAGCTTTGCTCGAAGAAACTATGATTGGAACAAAAACGCACAAAATTATTTTTTCTCATATCCTGCCCAATGCGTTAGGGCCGTGTATGGACCGGGTCATC
805	appC	AAGCTTTGCTCGAAGAAACTATGATGTCAGAGCTGCAAACAACTCCCTCGCCGGAGATCAGGCTGAAAGAAAATATTTCTGTATGGACCGGGTCATC
806	appC	AAGCTTTGCTCGAAGAAACTATGAAGTTGGGTCTGTTATTCTAGCTGAATCGGCGCTAAGCTACTTGGGCTTTGGAATCCAGCTGTATGGACCGGGTCATC
807	appD	AAGCTTTGCTCGAAGAAACTATGTTTAAAGACTTATTTTTTCAGGAAAAAGGAGCCGATCCCTGCGGTTGACGGAGTCGATGTATGGACCGGGTCATC
808	appD	AAGCTTTGCTCGAAGAAACTATGTTCTCATCACACACGACTTAGGTGTCGTGTCTGAAGCTGCCGATAGAGTGATTGTCATGTATGGACCGGGTCATC
809	appD	AAGCTTTGCTCGAAGAAACTATGTGCAAAATCCGCGGTAACGAAGTATCCATGATCTTTCAGGAACCAATGACCTCCCTTAATTGTATGGACCGGGTCATC
810	appD	AAGCTTTGCTCGAAGAAACTATGGGACGTGACAATACAAGCCCAGGTGCTGGAGCTCATGAAAGATCTCTGTCAGAAGTTGTATGGACCGGGTCATC
811	appD	AAGCTTTGCTCGAAGAAACTATGGCTCAGGCGGAAAAATCATGGACGGCTCTATTAAACTCGAAGACAAAGACCTCACCTCATTGTATGGACCGGGTCATC
812	appD	AAGCTTTGCTCGAAGAAACTATGGCGGACAAGTCGTAGAAAACGCCACTGTTGATGACTTATTTTTAGAACCGCTTCATCCGTGTATGGACCGGGTCATC
813	appD	AAGCTTTGCTCGAAGAAACTATGGAGATTGATAAATTAAATGCGATTAAAGGCAGTGTGCCTACACCGGATAATCTGCCGCCGTGTATGGACCGGGTCATC
814	appD	AAGCTTTGCTCGAAGAAACTATGGACAGAGGGTGATGATTGCCATCGCACTGAGCTGTAATCCTAAACTGCTCATTGCTGTATGGACCGGGTCATC
815	appD	AAGCTTTGCTCGAAGAAACTATGCGAAAGCTATGGATAAGTGCTGGACAAATCAGCCTTCGCTTTTGACACACAAAAGCGTGTATGGACCGGGTCATC
816	appD	AAGCTTTGCTCGAAGAAACTATGCCGTCGCGCTTGTAGGTGAATCGGGCTCCGGAAAAAGCATTACTTCTTTATCAATTTGTATGGACCGGGTCATC
817	appD	AAGCTTTGCTCGAAGAAACTATGAAGAAAAAAGAAGCCCGTCAACGAGCTGTTGAACTCTTGCAGATGGTCGGTTTCTCTGTATGGACCGGGTCATC
818	appF	AAGCTTTGCTCGAAGAAACTATGTTTCGTTAAAAAAAGGAGAAACACTCGGAATCGTTGGAGAGTCGGGCTGCGGAAAATTGTATGGACCGGGTCATC
819	appF	AAGCTTTGCTCGAAGAAACTATGTCAAGAAACAATCTTAGAGCTTCGTGACGTAAAAAAATACTTTCCGATCCGGTCAGGCCTGTATGGACCGGGTCATC
820	appF	AAGCTTTGCTCGAAGAAACTATGGTTTTCCAAGATCCATTTGCTTCGTTAAACCCGAGAAAGACCCTGCGTTCCATCATGTATGGACCGGGTCATC
821	appF	AAGCTTTGCTCGAAGAAACTATGGTAGGGCTTCACCCGTCGTTTGCCGGCCGTTATCCCCATGAGTTTTCAGGCGGCCTGTATGGACCGGGTCATC
822	appF	AAGCTTTGCTCGAAGAAACTATGGACAGAGTCGGAGTAATGTATCTTGGCAAAATGATGGAACTGACCGGCAAGCATGATGTATGGACCGGGTCATC
823	appF	AAGCTTTGCTCGAAGAAACTATGCCGATATGCAAGGAACAAATACCAGAATTTAAAGAAGCTGCTCCCAGCCACTTTGTGGCTGTATGGACCGGGTCATC
824	appF	AAGCTTTGCTCGAAGAAACTATGCCCAAGCGCTTTTATCCTCCGTTCCGGTTACAAGAAAAAGAGGTTCTGTCAAACGTGTGTATGGACCGGGTCATC
825	appF	AAGCTTTGCTCGAAGAAACTATGCAGAACGATGATCAGACTGTACAAACCGACAGAGGGCCAAATTCTTTTTAAAGGGCAGGATGTATGGACCGGGTCATC
826	appF	AAGCTTTGCTCGAAGAAACTATGATTGCCAGAGCACTCACTTTGAATCCAGAGCTGATCATTGCAGATGAGCCGGTTTTGTATGGACCGGGTCATC
827	appF	AAGCTTTGCTCGAAGAAACTATGAGAACTGCCTAGTCCGGCCAACCCGCCAAAAGGCTGCGTATTCCACACAAGATGTTGTATGGACCGGGTCATC
828	appF	AAGCTTTGCTCGAAGAAACTATGACGCACAACATGTATACCATGCGTGAACGAAACGAAAAAGTTGAAGAGCTGCTTGCTGTATGGACCGGGTCATC
829	appF	AAGCTTTGCTCGAAGAAACTATGACAGGAAGAATTTAATCTTACGTATCTATTTATCTCTCATGATCTGAGTGTCGTCCGCCATGTATGGACCGGGTCATC
830	aprE	AAGCTTTGCTCGAAGAAACTATGTCAGCAACATGTCTGCGCAGGCTGCCGGAAAAAGCAGTACAGAAAAGAAATACATTGTATGGACCGGGTCATC
831	aprE	AAGCTTTGCTCGAAGAAACTATGTCAAAAGCAATTTAAGTATGTTAACGCGGCCGCAGCAACATTGGATGAAAAAGCTGTGTATGGACCGGGTCATC
832	aprE	AAGCTTTGCTCGAAGAAACTATGTACTGGTTCTACAGCGCTGAAAACAGTCGTTGACAAAGCCGTTTCCAGCGGTATCTGTATGGACCGGGTCATC
833	aprE	AAGCTTTGCTCGAAGAAACTATGGTGTCCATCCAAAGCACACTTCCTGGAGGCACTTACGGCGCTTATAACGGAACGTTGTATGGACCGGGTCATC
834	aprE	AAGCTTTGCTCGAAGAAACTATGGGTAAACAGCAGCAACCAAAGAGCTTCATTCTCCAGCGCAGGTTCTGAGCTTGATTGTATGGACCGGGTCATC
835	aprE	AAGCTTTGCTCGAAGAAACTATGGAAGCAAAAAATTGTGGATCAGCTTGTTGTTTGCGTTAACGTTAATCTTTACGATGGCGTTGTATGGACCGGGTCATC
836	aprE	AAGCTTTGCTCGAAGAAACTATGGAAAAAAGATCCGAGCGTTGCATATGTGGAAGAAGATCATATTGCACATGAATATGCGCATGTATGGACCGGGTCATC
837	aprE	AAGCTTTGCTCGAAGAAACTATGCGTTAATTCTTTCTAAGCACCCGACTTGGACAAACGCGCAAGTCCGTGATCGTTTAGTGTATGGACCGGGTCATC
838	aprE	AAGCTTTGCTCGAAGAAACTATGCGGAAGCACAAGCACAGTCGGCTACCCTGCAAAATATCCTTCTACTATTGCAGTAGGTGCTGTATGGACCGGGTCATC
839	aprE	AAGCTTTGCTCGAAGAAACTATGCGCCGGCTCTTCACTCTCAAGGCTACACAGGCTCTAACGTAAAAGTAGCTGTTATCGACATGTATGGACCGGGTCATC
840	aprE	AAGCTTTGCTCGAAGAAACTATGCCGCTCTTAATAACTCAATCGGTGTTCTGGGCGTAGCGCCAAGCGCATCATTATATTGTATGGACCGGGTCATC
841	aprE	AAGCTTTGCTCGAAGAAACTATGAGCGGCCAATATAGCTGGATTATTAACGGCATTGAGTGGGCCATTTCCAACAATATGGATTGTATGGACCGGGTCATC
842	aprE	AAGCTTTGCTCGAAGAAACTATGAGCAAGCTTCGTACCTTCTGAAACAAACCCATACCAGGACGGCAGTTCTCACGGTACTGTATGGACCGGGTCATC
843	aprE	AAGCTTTGCTCGAAGAAACTATGAAACAGACAATGAGTGCCATGAGTTCCGCCAAGAAAAAGGATGTTATTTCTGAAAAAGGCTGTATGGACCGGGTCATC
844	aprX	AAGCTTTGCTCGAAGAAACTATGTTCCTTCTCAAGCCGCGGCCCGACAGTATACGGGAAAGAAAAGCCCGATATTTTAGTGTATGGACCGGGTCATC
845	aprX	AAGCTTTGCTCGAAGAAACTATGTTCAATACAATGAGGACAACCCCGATGAACCGATTGATATTATGAGCATGTCGCTCGTGTATGGACCGGGTCATC
846	aprX	AAGCTTTGCTCGAAGAAACTATGTGTCGATACAGGAATCTACCCGCATCCTGATCTAGAAGGAAGAATTATCGGATTCGCGGTGTATGGACCGGGTCATC
847	aprX	AAGCTTTGCTCGAAGAAACTATGTGCAGCAATATCCGTAAAGTGTATTTAAACCGCGAAGTCAAAGCGCTTTTAGACACGGCATGTATGGACCGGGTCATC
848	aprX	AAGCTTTGCTCGAAGAAACTATGTCGGCGTAAAGGTATTAAACAAGCAGGGTTCAGGAACGTTAGCAGATATTATAGAGGGTGTGTATGGACCGGGTCATC
849	aprX	AAGCTTTGCTCGAAGAAACTATGGTCAGTCATTATCGAATTTGAGGAAGGCTGTCACGAGACCGGCTTTCAAATGGCTTGTATGGACCGGGTCATC
850	aprX	AAGCTTTGCTCGAAGAAACTATGGCTTCAACAAAATCAACTGCTGCAGCGCCGAGGTTACTCCTTCAGCATTACATTCTGTATGGACCGGGTCATC
851	aprX	AAGCTTTGCTCGAAGAAACTATGGCGTGAGCGAAAAGGTGATTACAGTAGGTGCGCTTGACGATAACAATACTGCAAGCAGTGTATGGACCGGGTCATC
852	aprX	AAGCTTTGCTCGAAGAAACTATGGCAAATGCTCACAAGCTAGATTGGCCGTTACGGGAAACCGTATTGCAACTTTACAAGCTGTATGGACCGGGTCATC
853	aprX	AAGCTTTGCTCGAAGAAACTATGGATCATGAACAGGAAGATCCGTTAGTCAGAGCGGTTGAGGAAGCGTGGAGCGCAGTGTATGGACCGGGTCATC
854	aprX	AAGCTTTGCTCGAAGAAACTATGGAAAGATGAAGATCCGAATATCTACGGAGCGGGCGCTGTCAACGCAGAAAATTCCTGTATGGACCGGGTCATC
855	aprX	AAGCTTTGCTCGAAGAAACTATGCTCCAAAAGTCAAGCCGTGTAGGGTCTCAGTACTTTACAATGTCAGGAACCTCGATGGCATGTATGGACCGGGTCATC
856	aprX	AAGCTTTGCTCGAAGAAACTATGCGCAGGAATCGCAGCTTTAATTCTTCAGCAAAACCCGGATCTTACCCCTGATGAAGTATGTATGGACCGGGTCATC
857	aprX	AAGCTTTGCTCGAAGAAACTATGATGCGAAGGAAGTCGTCAGAAACGGGCAAACCCTGACAGGAAAAGGTGTTACTGTTGTATGGACCGGGTCATC
858	apt	AAGCTTTGCTCGAAGAAACTATGTGGATTTAAAACAATACGTAACAATTGTACCGGATTACCCGAAAGAGGGCGTGCAATGTATGGACCGGGTCATC
859	apt	AAGCTTTGCTCGAAGAAACTATGTACGGAAAAGACGTATTAACGATCCACAAAGATGCGATTAAGCCTGGTCAGCGTGTGCTTGTATGGACCGGGTCATC
860	apt	AAGCTTTGCTCGAAGAAACTATGGGCGTTGTTGCTGGTATCGCTTTCTTAATCGAGCTTTCTTACCTTGACGGCAGAAATGTATGGACCGGGTCATC
861	apt	AAGCTTTGCTCGAAGAAACTATGCCGGTCCGCAAAGAAGGCAAGTTGCCTCGTGAAGTAATCAAAGTGGATTATGGCTTGTATGGACCGGGTCATC
862	apt	AAGCTTTGCTCGAAGAAACTATGATTACAGATGACCTGCTTGCGACAGGCGGCACAATTGAAGCGACAATCAAACTTGTTGTATGGACCGGGTCATC
863	apt	AAGCTTTGCTCGAAGAAACTATGACACTGATGGATAAAGGCGATGTATACCGCTATGCCACAGATCAAATTGTTGAATATGCGTGTATGGACCGGGTCATC
864	apt	AAGCTTTGCTCGAAGAAACTATGAAAGAAAAGCAAATTGATTTGGTCGTTGGCCCTGAAGCGCGCGGCTTTATTATCGTGTATGGACCGGGTCATC
865	araA	AAGCTTTGCTCGAAGAAACTATGTGAAGGAGATTGGAAGACAGCGGCCCTTGTACGGATGATGAAAATCATGGCTAAAGTGTATGGACCGGGTCATC
866	araA	AAGCTTTGCTCGAAGAAACTATGTAACCGCTTTTCTTGAGCAAGGCGGATACACAGCGTTTACGACATCGTTTGAAGTGTGTATGGACCGGGTCATC
867	araA	AAGCTTTGCTCGAAGAAACTATGGGATCGCATTACGGACGACGAGGTTGACACGCTTTATGCCGAGTATGACAGACTATTGTATGGACCGGGTCATC
868	araA	AAGCTTTGCTCGAAGAAACTATGGCATATTCAATTTGGCTGGCAGGTTGACGGATATGGCATCGGGGATCTCGTTGAAGTTGTATGGACCGGGTCATC
869	araA	AAGCTTTGCTCGAAGAAACTATGGAGAGTACGGTTACATCAACTCGAGAATGGGGCTTAGCCGAAAAGTCATTGCCGGTGTATGGACCGGGTCATC
870	araA	AAGCTTTGCTCGAAGAAACTATGGAAATGAAATGATTCTGGGCTCTCACATGCTTGAAGTGTGTCCGACTGTCGCTTTTGTATGGACCGGGTCATC
871	araA	AAGCTTTGCTCGAAGAAACTATGCATATTAAGGTTGCCAGATTTGGAGATAACATGCGTCATGTCGCGGTAACGGACGTGTATGGACCGGGTCATC
872	araA	AAGCTTTGCTCGAAGAAACTATGATTGGGCGGAAATGGCGGGAATCGAAAGTGTTCTCATTTCCCGTGATACGACAATTTGTATGGACCGGGTCATC
873	araA	AAGCTTTGCTCGAAGAAACTATGATTATGAATTCTGGTTTGTGACAGGAAGCCAGCACCTATACGGGGAAGAGACGCTGGTGTATGGACCGGGTCATC
874	araA	AAGCTTTGCTCGAAGAAACTATGATCAAAAACCGCTTATGCATTTGCATACCCAATATAATCGCGATATCCCGTGGGGTACGTGTATGGACCGGGTCATC
875	araA	AAGCTTTGCTCGAAGAAACTATGAGGTTCATTCGCTTTCGATTGGCGGCAAAGAGGACCCTGCGCGTTTGGTATTTAACTGTATGGACCGGGTCATC
876	araA	AAGCTTTGCTCGAAGAAACTATGAGGCATGGATTTTAGCCGGCGGTGCACACCATACCTGCCTGTCTTATGAACTGACTGTATGGACCGGGTCATC
877	araA	AAGCTTTGCTCGAAGAAACTATGAAGCATTTGTGAGGGGCTCAGCGGGATTTCTTCCAGATATAAAATCACTCATAAGCCCGTGTATGGACCGGGTCATC
878	araA	AAGCTTTGCTCGAAGAAACTATGAAGAGAAGCGGAGTACAGTGAGACATGTGCTGGCATCATTACATGGATGCACACATGTATGGACCGGGTCATC
879	araB	AAGCTTTGCTCGAAGAAACTATGTGGTGAAAGCGGCTTGCTTGCTTTAGATTGGTGGAATGGAAACCGTTCAACTCTTTGTATGGACCGGGTCATC
880	araB	AAGCTTTGCTCGAAGAAACTATGTGACAAACATGGACATTAAAATCTCTGGTTCACCGCAAGCCCCAGCCTTAGGATCTTGTATGGACCGGGTCATC
881	araB	AAGCTTTGCTCGAAGAAACTATGGCTGCCTGAATATGAAGAGGAGCCGCACAGCTATGTGAAGCTCTGGAAGCATCATTGTATGGACCGGGTCATC
882	araB	AAGCTTTGCTCGAAGAAACTATGGCTGATGATTATGGGAACCTCGACGTGCCATGTTCTACTTGGTGAAGAGGTGCATATGTATGGACCGGGTCATC
883	araB	AAGCTTTGCTCGAAGAAACTATGGATCATTTTGACTGGTTTGTGAAAACATGTGTCCCGCCAGCTTATCAAGAGGAAGCATGTATGGACCGGGTCATC
884	araB	AAGCTTTGCTCGAAGAAACTATGGAAAAATTTCATCAGAATGGATGATTCCAAAGGTCATGCAAATTGCCGAGGAAGCGTGTATGGACCGGGTCATC
885	araB	AAGCTTTGCTCGAAGAAACTATGCTTTACTCGAACAGACGGGCGTTGACCCGAAAGACATTATCGGGATTGGAATTGATTGTATGGACCGGGTCATC
886	araB	AAGCTTTGCTCGAAGAAACTATGCTCAAGCGAAGCAATTGTACCGCAGGGTATAAAGCGATGTGGAGTGAAAAAGCGGTGTATGGACCGGGTCATC
887	araB	AAGCTTTGCTCGAAGAAACTATGCCAAAAACATGCTGATCGGCTCAATCAAATCGCGGAAGAAGAAGGAGAGGCTTTTTTACTGTATGGACCGGGTCATC
888	araB	AAGCTTTGCTCGAAGAAACTATGAGTGCTCGTTCATGTCCAAACAGGGGAGGAACTTGCGGCTGCTGTAAAAGAATACTGTATGGACCGGGTCATC
889	araB	AAGCTTTGCTCGAAGAAACTATGAGAGCGTTAGTTGAAGCGACAGCTTACGGAACCCGGATGATTATCGAAACATTCAAAGAATGTATGGACCGGGTCATC
890	araB	AAGCTTTGCTCGAAGAAACTATGAGAAAACCATGTCATGAAGCGTCTGAAAACGATCAAAAATCTTCAATTTTCATCTGCCGCTGTATGGACCGGGTCATC
891	araB	AAGCTTTGCTCGAAGAAACTATGAACGCCGCGGTTTATGAAAAATTGTACGCTGAATATAAAGAGCTGGTTCATTATTTCGGATGTATGGACCGGGTCATC
892	araB	AAGCTTTGCTCGAAGAAACTATGAAAGGCGGCTACGATGATATCAAAAAGGCAGCGGCGAACATGGGAAAACTGAAAGATATATGTATGGACCGGGTCATC
893	araD	AAGCTTTGCTCGAAGAAACTATGTGTTTTGAACCTTGATGGAGAGGTCGTCGAAGGCTCGCTTAAACCTTCTTCAGATACACCTGTATGGACCGGGTCATC
894	araD	AAGCTTTGCTCGAAGAAACTATGTCACTCCATTATGCTGAACAAGGATGTAACCCCAATCAATACAGTCCTGCATGAAAAGCATGTATGGACCGGGTCATC
895	araD	AAGCTTTGCTCGAAGAAACTATGGAAAAGTCATAGCGGAAACCTTTCAGCATCATAATTACGAACAGGTGCCGGGTGTGCTTGTATGGACCGGGTCATC
896	araD	AAGCTTTGCTCGAAGAAACTATGCTGCCAACCTGAAGCTTCAAGAGCATCAGCTGGTAACCTTTACGTGGGGAAATGTTGTATGGACCGGGTCATC
897	araD	AAGCTTTGCTCGAAGAAACTATGCTATATAAAGCCTTTCCGAATATCGGGGGAATTGTCCATACCCATTCTCAATGGGCGACATGTATGGACCGGGTCATC
898	araD	AAGCTTTGCTCGAAGAAACTATGCACGACCCATGCTGATTATTTTGACAGTGCGATTCCATGTACTCGAGAAATGTACGATGATGTATGGACCGGGTCATC
899	araD	AAGCTTTGCTCGAAGAAACTATGACTGACGCCTTAAATGCCATTCATAACGCAGTTGTATTAGAAACGGTTGCCGAAATGGCTGTATGGACCGGGTCATC
900	araD	AAGCTTTGCTCGAAGAAACTATGAAAGAATTGTCATCAAACCTAGCGGAGTCGAATACAGCGACCTGACAGCCGATGATGTATGGACCGGGTCATC
901	araE	AAGCTTTGCTCGAAGAAACTATGTGGCTATTTTTATGATTTTAATCGGGACGTCGTTTTATTTTGAGTTAACAAGCGGGATCATGTATGGACCGGGTCATC
902	araE	AAGCTTTGCTCGAAGAAACTATGTGGCGCCATCGGTTTTCTGAAAGATTTATACAGCCTGAGTCCGTTTATGGAGGGACTTGTATGGACCGGGTCATC
903	araE	AAGCTTTGCTCGAAGAAACTATGTGATGATCGTCCTTATATTAGGTTTTGTCGCTGCTTTCTGTGTCTCGGTCGGACCGTGTATGGACCGGGTCATC
904	araE	AAGCTTTGCTCGAAGAAACTATGTATTGCGGTGTTGCTGATTGATAAAGTCGGACGAAAAAAACTGATGTCCATCGGTTCTGTGTATGGACCGGGTCATC
905	araE	AAGCTTTGCTCGAAGAAACTATGGTCTCAGAAAGGCGCTTGTCATTGGAATCCTGCTGGCGCTGTTTAACCAAGTCATTGTATGGACCGGGTCATC
906	araE	AAGCTTTGCTCGAAGAAACTATGGCGGCACCGCCCGCTATACGCGGAAGTTTATCTTCGTTATATCAGCTCTTTACGATGTATGGACCGGGTCATC
907	araE	AAGCTTTGCTCGAAGAAACTATGGCATTATGATTGGAGGAGTTGTGGGCGTCGGGATATCCGGATTTTTAAGTGACAGATTCTGTATGGACCGGGTCATC
908	araE	AAGCTTTGCTCGAAGAAACTATGGCAAAACGCCGGATTTGTGACGACTTGTATCGTCGGGGTTGTAGAAGTTATTTTTACCGTGTATGGACCGGGTCATC
909	araE	AAGCTTTGCTCGAAGAAACTATGGATCGGACAGTTTGTGCCAATGATGATCGATTCTTTCGGGCTCGCCTATACATTTTTGTATGGACCGGGTCATC
910	araE	AAGCTTTGCTCGAAGAAACTATGCTCCAACTCAATTAGAACCAAATGTTCCTGTAACAAGAAGCCATTCAATGGGATTTGTCATGTATGGACCGGGTCATC
911	araE	AAGCTTTGCTCGAAGAAACTATGCCTGTTTGTCGTTACGATCTGTCCAGAAACGAAGAACAAATCGCTCGAGGAAATTGAAAATGTATGGACCGGGTCATC
912	araE	AAGCTTTGCTCGAAGAAACTATGATTTTTTTCCTTGTCCTGCTCGTCGTCCCGGAAAGTCCGAGATGGCTGGCGAAAGTGTATGGACCGGGTCATC
913	araE	AAGCTTTGCTCGAAGAAACTATGATCAGCAATCGTTTCAGCGCTTTCTCAAGACGTGTCCACCTTAATCATTGCAAGGTGTATGGACCGGGTCATC
914	araE	AAGCTTTGCTCGAAGAAACTATGAACATACTTTATTAATCTAGCTGTGCAGCGGTCCGGAACATACGAATGGGGCGTGCACTGTATGGACCGGGTCATC
915	araL	AAGCTTTGCTCGAAGAAACTATGTGAAAAGCGCCTTAGTGCTAACTGGTTCTGCGAAACAGGGTGAACAGCGTTTGTATGTATGGACCGGGTCATC
916	araL	AAGCTTTGCTCGAAGAAACTATGGGCTGGCATTCTGATTGACTTGGACGGTACTGTATTCAGAGGAAATGAGTTGATCGAAGGTGTATGGACCGGGTCATC
917	araL	AAGCTTTGCTCGAAGAAACTATGGGCGCTCGTATTATCGCTACAAACAAAGACCGCTCTTTTCCGAACGAAGACGGAAATTGTATGGACCGGGTCATC
918	araL	AAGCTTTGCTCGAAGAAACTATGGGATTGGCTCGTGATCTCCCTTCATGAAACGCTCACGTACGACGATTTAAATCAATGTATGGACCGGGTCATC
919	araL	AAGCTTTGCTCGAAGAAACTATGGGAATGATCGGGGCAATTGAGACTTCTGCACAAGCGAAGACTGAACTTGTTGTCGTGTATGGACCGGGTCATC
920	araL	AAGCTTTGCTCGAAGAAACTATGCGGATTATGTGCTGGATTCTATTAAGGATGTAACCAAATTGGCTGAGGAGGGGATTCTGATGTATGGACCGGGTCATC
921	araL	AAGCTTTGCTCGAAGAAACTATGAGCAAGAGAAGCGATCAAAACGCTTAGGAGAATGGGAAAGAAAATCGTCTTTTTAAGCAATGTATGGACCGGGTCATC
922	araL	AAGCTTTGCTCGAAGAAACTATGACATTATCGTTTTTCAAAGGTATGGGTGCTTGGGGAGCAAGGCTTGGTTGACGAGTGTATGGACCGGGTCATC
923	araL	AAGCTTTGCTCGAAGAAACTATGAATGCATGATTATAGGAGACAGCATTGAATCTGACATTGCGATGGGGAAGCTTTATGGCATGTATGGACCGGGTCATC
924	araL	AAGCTTTGCTCGAAGAAACTATGAAAAAACTTCTTGGCGCGGGGATTGAAACGGACGTAAACGACATTGTTCTGTCATTGTATGGACCGGGTCATC
925	araM	AAGCTTTGCTCGAAGAAACTATGTTTGGTGACATGCTCGGTAAAATCACGTCTTTAGCAGATTGGGAAATATCCCGGCATTGTATGGACCGGGTCATC
926	araM	AAGCTTTGCTCGAAGAAACTATGTGGGCTGTGCCGCTGTTTTATTAACTGACACATACAGAAAGCTCGCTCAGGATGATGTATGGACCGGGTCATC
927	araM	AAGCTTTGCTCGAAGAAACTATGGCGGCGTTTCAAAGAGATTTGCCGTTTATTTCTTATCCGACTGCTCCATCTGTAGACGTGTATGGACCGGGTCATC
928	araM	AAGCTTTGCTCGAAGAAACTATGGATTATTTTATACGGCACGAAAACAACCATTCAAACGAAGGCCCCATCTGCGCTGTTGTATGGACCGGGTCATC
929	araM	AAGCTTTGCTCGAAGAAACTATGGATCATTCCAGAAAATGAAGCCGGAGATGTGACAGCTGATGAACGATCGCTCATTTGTATGGACCGGGTCATC
930	araM	AAGCTTTGCTCGAAGAAACTATGGAAGCCATCCAATCGGCTTATCAAACACTCCCGAGAGGAGAAGTGCTGGCTGATTTGTATGGACCGGGTCATC
931	araM	AAGCTTTGCTCGAAGAAACTATGGAAAAAACAATCAACATATTGTCCTTGTCTGCGACGCGAATACACACCGCATTGCTGTATGGACCGGGTCATC
932	araM	AAGCTTTGCTCGAAGAAACTATGCTTCAGACACGCGCACACCTTAAGAGACCGATGCACCGGATTAAGAATCATCAATTGTATGGACCGGGTCATC
933	araM	AAGCTTTGCTCGAAGAAACTATGCGCCGGAGAAAAGACGTTGCCTATAAAAGTTGAAGAAATTGTTCTCGGTAAGCAAGCAGCTGTATGGACCGGGTCATC
934	araM	AAGCTTTGCTCGAAGAAACTATGATTGGATTGAAATGGAGTTAATGGAGAAAAAACGGCCTCAGATTCTTCATGGGGCAAAGGTGTATGGACCGGGTCATC
935	araM	AAGCTTTGCTCGAAGAAACTATGATACGAAACAACCAACGGATGTCATGATCGCAGTCGGTTCGGGCACGATTCATGATATTGTATGGACCGGGTCATC
936	araM	AAGCTTTGCTCGAAGAAACTATGAGCTAAGATCGTTCAGGAGGCGCTTGCTGCCTGCATTGAACACACAGAAGACATTTGTATGGACCGGGTCATC
937	araM	AAGCTTTGCTCGAAGAAACTATGAGATCAGCCGGAGGCCCTGCGTATTTTGACGAAATCGGTGTCGGGCAGGATTCCGTTGTATGGACCGGGTCATC
938	araM	AAGCTTTGCTCGAAGAAACTATGACGGGTTTTGATGGAGTCTTTACTTGTATCGGGGCTTGTCATGCTGGCATTAGATCATTCTGTATGGACCGGGTCATC
939	araN	AAGCTTTGCTCGAAGAAACTATGTGTTGTACCGAAGCAATCCAAGCATGTTGAGTTAGCAAAAGAGTTTTTGGCCTTTGCGTGTATGGACCGGGTCATC
940	araN	AAGCTTTGCTCGAAGAAACTATGTGGACATTTAACGGGCTTCATGAGCAGTTCTATGTGGAAATGGTGAAGGAATGGAACATGTATGGACCGGGTCATC
941	araN	AAGCTTTGCTCGAAGAAACTATGTCCTGACCGCAAAATTAAGCTGAATACGGTCGTTTATCCATATGGACAAATGCACGATGTATGGACCGGGTCATC
942	araN	AAGCTTTGCTCGAAGAAACTATGTATCTCCCTAATAGCGGGAGAAGGCGTTCCTGATATTGCAGATGTCGAATTGGCCCTGTATGGACCGGGTCATC
943	araN	AAGCTTTGCTCGAAGAAACTATGGGCGGGCATCACAGTGAAGAATACTACGGCTTTATGAACCAAGGAGGAGCTGCTTTGTATGGACCGGGTCATC
944	araN	AAGCTTTGCTCGAAGAAACTATGCGGACTCGATACACATGTAGGGACAACGGTCATGTTTTATAACATGGATGTGATGAAAAATGTATGGACCGGGTCATC
945	araN	AAGCTTTGCTCGAAGAAACTATGCGGAACAGGCATTTTTTCTGTGCTGCTCGATATCAAGGATGAAATCAATCCAATTTTGTATGGACCGGGTCATC
946	araN	AAGCTTTGCTCGAAGAAACTATGATTGAAAAGGATCGCGATAAATTCGTTGAGGCGCGGCTGACATTGTACAGCAAAAACTGTATGGACCGGGTCATC
947	araN	AAGCTTTGCTCGAAGAAACTATGATTAAAACATGGGATGATTACCATAAAGCCGGACAGAAAGTGCGCAAAGTGACCGGGTGTATGGACCGGGTCATC
948	araN	AAGCTTTGCTCGAAGAAACTATGATGAGGATTTTGCCAAGGCTTCAGACCTTGTCAACAGAAGCGTATTGTTCGACGCTGTATGGACCGGGTCATC
949	araN	AAGCTTTGCTCGAAGAAACTATGAGCAAAAAACGCCTAAACAAGCCTTGGACAGAGCGGCAGGTGAACTGAAACAGAAATATGTATGGACCGGGTCATC
950	araN	AAGCTTTGCTCGAAGAAACTATGAAGAAGGAAATAAAAAACTCTGGAGCGTACTCGGCTTTGACCCGCTTCGCTGGGATTGTATGGACCGGGTCATC
951	araN	AAGCTTTGCTCGAAGAAACTATGAACAAATGATTCCGCAACGTTCTTATCTATGATTTCACAGCAAAACTCAGGCTATTTTGATGTATGGACCGGGTCATC
952	araN	AAGCTTTGCTCGAAGAAACTATGAAAACACTTCAATATTTAAAAGACATGATCAATGATAAAACGATGATTCCTGCGCCGGGCTGTATGGACCGGGTCATC
953	araP	AAGCTTTGCTCGAAGAAACTATGTCCTGTTCCATTGCTTCTGGCCATATTCCTGAATTCAAAGCTGGTCAAATTTAGAAATGTATGGACCGGGTCATC
954	araP	AAGCTTTGCTCGAAGAAACTATGGTTCTATACCGCCCTTTGGAATACGCTGGAATACACCTTTTGGACGCTGATCGTGCTTGTATGGACCGGGTCATC
955	araP	AAGCTTTGCTCGAAGAAACTATGGGAAACGTCTCTGGCCAATTCCATCCTACTTAAACTCGGCTTTTCACCTCAGAACTGGATGTATGGACCGGGTCATC
956	araP	AAGCTTTGCTCGAAGAAACTATGCGAAACAATCAGGCTGGCGAGATCTGTTTTATTCAAAAAAAGCGGCGCCCTATCTTGTATGGACCGGGTCATC
957	araP	AAGCTTTGCTCGAAGAAACTATGCCTTGTTGTCAGCCTGATTTCATTAAAGCTGTCAGGCTCGTTTAAGGGGGAGGGATGTATGGACCGGGTCATC
958	araP	AAGCTTTGCTCGAAGAAACTATGCAGCGCCATTCGTTTTATCCTTTCTCGTATTTTTTCTATACCCCATCATTAGTGTCTTCATGTATGGACCGGGTCATC
959	araP	AAGCTTTGCTCGAAGAAACTATGATTTTGCCGGGAGAGGTGTCCTTTGTCGGATTGTCTAATTATACAGCGCTAAACAACCCGTGTATGGACCGGGTCATC
960	araP	AAGCTTTGCTCGAAGAAACTATGATTATTTATCCCGGCATTGACCTCAACCATTGTCGCGGGGATCATTTTTCGGCTGTGTATGGACCGGGTCATC
961	araP	AAGCTTTGCTCGAAGAAACTATGATGTTTTTGATGGTGCTGCTTGCTTCATGGAGATGGATGGGAATCAACATCCTTTTGTATGGACCGGGTCATC
962	araP	AAGCTTTGCTCGAAGAAACTATGAGCTACGTCCTTTGGCAGAATAATTCCCCGGGTAATATTGGTCTGACGCTTGTCGGATATGTATGGACCGGGTCATC
963	araP	AAGCTTTGCTCGAAGAAACTATGAGCAGGTTTGCAAAATGTGCCGAAAGAGCTGTACGAAGCCGCTGATATAGACGGCTGTATGGACCGGGTCATC
964	araP	AAGCTTTGCTCGAAGAAACTATGACTTGCCTACAATGAAATGGGATACGGAGCGGCCATCGGCATTGTGCTTTTGATTTGTATGGACCGGGTCATC
965	araP	AAGCTTTGCTCGAAGAAACTATGAAAATTTCTGCACATCACGCTGCCGTTTCTCAAGCCTGTAACCGTATATGTGCTGATGTATGGACCGGGTCATC
966	araQ	AAGCTTTGCTCGAAGAAACTATGTTTGCCGGTGATTATCATTTTCTTGTTTTTCCAAAAGTACTTTATCTCCGGCCTGACGGTGTATGGACCGGGTCATC
967	araQ	AAGCTTTGCTCGAAGAAACTATGTTGATCGATTCATATACGGGTGTCATATTGCCGTTTATCGTTTCACCTGTTGCTGTTTTCTGTATGGACCGGGTCATC
968	araQ	AAGCTTTGCTCGAAGAAACTATGTGTTGCGGCACAGTCCTCAGTTTAGCGTTTATAGAATTGCGCTGACCCTGTTTTTTATGATGTATGGACCGGGTCATC
969	araQ	AAGCTTTGCTCGAAGAAACTATGTGGCGGCAGCATTTATTTCAAATGGTTTTTTAACAGTCTTGTACTCGGACTTTTTACGACTGTATGGACCGGGTCATC
970	araQ	AAGCTTTGCTCGAAGAAACTATGTCGGGTACGGGCTTGCGGTTTATGATTTTAAGGGCAGAAATATCATCTTTGTTCTTGTGCTGTATGGACCGGGTCATC
971	araQ	AAGCTTTGCTCGAAGAAACTATGTATGATGGTTCCGCTGGAAGTGATGATGCTTCCTCTGTTTAAACTTACTGTCGGACTGCATGTATGGACCGGGTCATC
972	araQ	AAGCTTTGCTCGAAGAAACTATGGCTGTCCAGCTTGCTGAGCCCTTATGGAAATAATTACGACATGCTTATATCCGGCTCATGTATGGACCGGGTCATC
973	araQ	AAGCTTTGCTCGAAGAAACTATGGATTTTCTGTTTGCTTTTAGGATCATTAAAGCCGTCATCTGAGCTTTTGCGTGTGGGGCTGTATGGACCGGGTCATC
974	araQ	AAGCTTTGCTCGAAGAAACTATGCTGGACTCTGCAAGGATGGACGGCTGTACGGAATTCGGCATCTTTTTCAGGATTATTGTATGGACCGGGTCATC
975	araQ	AAGCTTTGCTCGAAGAAACTATGCCGGCTTTCGGTGCGATGATTATCCTTCAGTCCTTAAACAGCTGGAACAACTTCTTGTTGTATGGACCGGGTCATC
976	araR	AAGCTTTGCTCGAAGAAACTATGTTTTCCCGAGCATCATCAGAGGAATCGAGTCCTATTTAAGCGAGCAGGGGTATTCTATGCTGTATGGACCGGGTCATC
977	araR	AAGCTTTGCTCGAAGAAACTATGTTTGCTTTCTCTCGGCCACACGCATATGATGGGTATTTTTAAAGCTGATGACACACAAGGTGTATGGACCGGGTCATC
978	araR	AAGCTTTGCTCGAAGAAACTATGTTCTTACAAAGAACGCTGTGATATACTGAAATTTGTCCGTATACATTTTGGAGGAATGGATGTATGGACCGGGTCATC
979	araR	AAGCTTTGCTCGAAGAAACTATGTGCTGAGGGAGATGGATCTTAAAGTGCCGGAGGATATGTCTATTGTCGGGTACGATGATGTATGGACCGGGTCATC
980	araR	AAGCTTTGCTCGAAGAAACTATGTCAAAACTTCTGGAGAAAGTAAAAGCCACACTGGAGAAAAACAGCAAGCACATGCCGATGTATGGACCGGGTCATC
981	araR	AAGCTTTGCTCGAAGAAACTATGGCACCGGGAGCGTGAGTTGTTTCCTTCTCCGGATATGATCGTGACATTTACAACGTGTATGGACCGGGTCATC
982	araR	AAGCTTTGCTCGAAGAAACTATGGAAACTAACCTCTGTCAAACATCCGAAATCAGTGCTTGGAAAAGCAGCCGCCAAATGTATGGACCGGGTCATC
983	araR	AAGCTTTGCTCGAAGAAACTATGCTTTTGCGATGATTAACGCGTCATATGCCGAGCTTGCCGCGCCAAGTTTTACCTTTGTATGGACCGGGTCATC
984	araR	AAGCTTTGCTCGAAGAAACTATGCTTCACGCTCTGCTAAGTCAGCGCTGCATTCCAATAAAACGATCGGTGTTTTGACTGTATGGACCGGGTCATC
985	araR	AAGCTTTGCTCGAAGAAACTATGCAAACAACAACCCGGACAATGAAAGAAGAGGCTTAGAAAACCTGCTGTCCCAGCATATTGTGTATGGACCGGGTCATC
986	araR	AAGCTTTGCTCGAAGAAACTATGATCGTAGAACCGACAAAAAGCGCCCTTCAAACCCCAAACATCGGCTATTATCTGAACTTGTGTATGGACCGGGTCATC
987	araR	AAGCTTTGCTCGAAGAAACTATGAAGGCAAAATACTGCCCGATCAAAAAATCCCTACCGAAAACGAATTAATGCAGCAATTCGTGTATGGACCGGGTCATC
988	araR	AAGCTTTGCTCGAAGAAACTATGAAGAGGATGTCATATTTGAGCCTGAGTTGATCATTCGCCAGTCCGCACGAAAACTGTGTATGGACCGGGTCATC
989	araR	AAGCTTTGCTCGAAGAAACTATGAAAGCGATCGGAGACCTCGTATCACAAGGTCTGCTGTACAGCGTGCAAGGCGGAGTGTATGGACCGGGTCATC
990	arfM	AAGCTTTGCTCGAAGAAACTATGTCGCCCTTTATCTCAGTCAATGCCACTTCAGACATTCTGATTCTCAACATCCCATTGTATGGACCGGGTCATC
991	arfM	AAGCTTTGCTCGAAGAAACTATGGTATTAAAAGGCAGTGTCCGTTTTATGGACACAAGGCTCCCTGAAGGGTCGAAAACCGTTGTATGGACCGGGTCATC
992	arfM	AAGCTTTGCTCGAAGAAACTATGCCTATCAATTATTTTTGCGGTATCTGCATACATCACAGGATGAAAACGCTGAGCCCGGTTTGTATGGACCGGGTCATC
993	arfM	AAGCTTTGCTCGAAGAAACTATGCAACTTCCTATGTTTAATGAAGTGCCTCTATCCATTGTCGAAACCTTGCTGAAAAACGGCTGTATGGACCGGGTCATC
994	arfM	AAGCTTTGCTCGAAGAAACTATGACGTTTATCCGCGGTTCATGTGATCAGTCTCCATCTTTTCTTCATTCTCAATCTGTTTTGTATGGACCGGGTCATC
995	arfM	AAGCTTTGCTCGAAGAAACTATGAAAATGATGTCTTATCATCCGCAGCTGCAAATGAACTTTTTGGCTATGCTTCAGCAAAATGTATGGACCGGGTCATC
996	argB	AAGCTTTGCTCGAAGAAACTATGTCACAAATATGCTGAAACGGTTAAATATCAAGACAGAGTTTTCGGGCGGACAGAGGAAAATGTATGGACCGGGTCATC
997	argB	AAGCTTTGCTCGAAGAAACTATGTCAATTCAGCCTTGTCAGCTTTATCAGATCAGGTGTCTGAAGTCATGATCGTAAACGGTTGTATGGACCGGGTCATC
998	argB	AAGCTTTGCTCGAAGAAACTATGGGGCATTTCTGGTAAGGATGGCGGTCTTTTGGAGGCTGATTATCTAGATCCGGAAACATATGTATGGACCGGGTCATC
999	argB	AAGCTTTGCTCGAAGAAACTATGGGCGGAAATGGTTTTATCCGGTTCTGTCAATAAATTTTTCGTTGCTGAGCTTGCCATGTATGGACCGGGTCATC
1000	argB	AAGCTTTGCTCGAAGAAACTATGGGATCATTCTTCGCAGAACAAACCTTTCAAGGGACAAAAATTGTCAAAGCAAAGGAGGCTGTATGGACCGGGTCATC
1001	argB	AAGCTTTGCTCGAAGAAACTATGCTGATGGAAAATGGCATCATCCCCGTTATTGCGCCGCTGTCTATGACAAGCGACTTGTATGGACCGGGTCATC
1002	argB	AAGCTTTGCTCGAAGAAACTATGCTGAAAGAGCTGAGGGCGTCAGGCTGGAAGCTGGCAATCGTACATGGCGGGGGACTGTATGGACCGGGTCATC
1003	argB	AAGCTTTGCTCGAAGAAACTATGCCTAAGGAGATTCAGATGCTGATCAAGCAGGAAGTGATCACAGGAGGGATGATCCCTGTATGGACCGGGTCATC
1004	argB	AAGCTTTGCTCGAAGAAACTATGATAAGCTGATGTTCGTCACGGATGTCGATGGAATCATGAAGGAAAAGCAGCGTCTTGTATGGACCGGGTCATC
1005	argB	AAGCTTTGCTCGAAGAAACTATGAATCGTTTTTAAATGCGGGGGAAGCGTCATCCGTGAGCTGTCGGAGGAATTTTATTGTATGGACCGGGTCATC
1006	argC	AAGCTTTGCTCGAAGAAACTATGTTAATTTGATGAATGGCTGGAATGAAGAAACTGGACTCACCATCACGCCAATTTATCCATGTATGGACCGGGTCATC
1007	argC	AAGCTTTGCTCGAAGAAACTATGTGTTTTGCTTGGCCTCGCGCCATTGGCTCAAAAGAAACTGCTCGATGAATCTTTCTGTATGGACCGGGTCATC
1008	argC	AAGCTTTGCTCGAAGAAACTATGTCAAGTGAATTGACTCCAAAGCTGGCAGACGCGGGAATTACGGTTATTGATCTGTCTGTATGGACCGGGTCATC
1009	argC	AAGCTTTGCTCGAAGAAACTATGTAAAATTTATAAAGTCAATGAACATCAGCACACGCCGGAAATTGAGCAGGCGCTGAATGATGTATGGACCGGGTCATC
1010	argC	AAGCTTTGCTCGAAGAAACTATGGTGTTTCCGGAGCGGGAAGAAAAGCATCCATGGGAACTCATTTTTCTGAGCTGAACTGTATGGACCGGGTCATC
1011	argC	AAGCTTTGCTCGAAGAAACTATGGGCAGCCAGGTCTCGGGCCCATTACATTTTCGGCTCACTTGGTTCCGATGACAAGTGTATGGACCGGGTCATC
1012	argC	AAGCTTTGCTCGAAGAAACTATGGCGGTATACGGTCTGGCAGAACTGAATCAACTGCAAATTCAACAGGCGAAACTCATTGTATGGACCGGGTCATC
1013	argC	AAGCTTTGCTCGAAGAAACTATGGAACGAACAGAGTCACGATCGTCTCGGTAATCGATAATTTAATGAAGGGTGCCGCCTGTATGGACCGGGTCATC
1014	argC	AAGCTTTGCTCGAAGAAACTATGCTCATCTTACCGGCTTAGCGGATCAGCAGCTGAAGCCGATTGATATGAATACGATCAATGTATGGACCGGGTCATC
1015	argC	AAGCTTTGCTCGAAGAAACTATGCATGCAGAGGAATGCATACTTTATTCATCCAGCGGAGAAGGGAATGTCTATAGCGAGGGTGTATGGACCGGGTCATC
1016	argC	AAGCTTTGCTCGAAGAAACTATGATTGTAGGTGCTACAGGATATGGAGGCACCGAACTTGTCAGGATTCTTTCGCATCATCCTTGTATGGACCGGGTCATC
1017	argC	AAGCTTTGCTCGAAGAAACTATGATGGCGACGATGTATACCAGATTAACCTGTGACCTAACCGCAGATGACCTGCATGATGTATGGACCGGGTCATC
1018	argC	AAGCTTTGCTCGAAGAAACTATGATAAAAGAACCGGCTGAATATGAAAAATGGTATAAACGGACAGCGGCACCGAAGGCGTGTATGGACCGGGTCATC
1019	argC	AAGCTTTGCTCGAAGAAACTATGAGAGTGAGGCCAAAAGGTCAGTACCCGCAAACGAAAGAAGTGTACGGCAGCAATTTGTATGGACCGGGTCATC
1020	argD	AAGCTTTGCTCGAAGAAACTATGTTGGAGAAGCGTTTACCCCTGGTTCTCACGGAACGACTTTCGGAGGAAACATGCTTGTATGGACCGGGTCATC
1021	argD	AAGCTTTGCTCGAAGAAACTATGTGCTGTGAATGCCACATTGCAAATTGTATTCCAGCCTGACTTTTTGCAAGAGGCTTGTATGGACCGGGTCATC
1022	argD	AAGCTTTGCTCGAAGAAACTATGTGATGCTTGAAACAGTGCAGGGAGAAGGAGGAGTCAATCCGGCGAGTGCTGAATTTTTATTGTATGGACCGGGTCATC
1023	argD	AAGCTTTGCTCGAAGAAACTATGGGGAAAAGGCTTCGCATATGAGCACTTCGGACTCTCACCGGATATCATCACAGTCTGTATGGACCGGGTCATC
1024	argD	AAGCTTTGCTCGAAGAAACTATGGCTTTCACTACCTGCCATACAATGATCCTTCTGCTTTTAAAGCTCTTGGGGAGGAAGGCGTGTATGGACCGGGTCATC
1025	argD	AAGCTTTGCTCGAAGAAACTATGCTTGATTTCATTCAGGGGATTGCGGTATCAAATCTAGGACACTGCCATGAAGCGGTTGTATGGACCGGGTCATC
1026	argD	AAGCTTTGCTCGAAGAAACTATGCTTGACAGCGTATGGCACGTATCCAACCTGTTTCAAAACAGTCTCCAAGAGCAAGCTGTATGGACCGGGTCATC
1027	argD	AAGCTTTGCTCGAAGAAACTATGCAGCCGTACAGTCGTTTTGCAAGGAAAAGCAAGCCCTTCTCATTATTGATGAAATCCATGTATGGACCGGGTCATC
1028	argD	AAGCTTTGCTCGAAGAAACTATGCAAAGGGGCGTTTTTAAAAGAACAGCTTGAGGCAGAGCTAAAGAGCCCTTTTGTTAAACATGTATGGACCGGGTCATC
1029	argD	AAGCTTTGCTCGAAGAAACTATGAGCAGCTTGTTTCAAACCTACGGCCGTTGGGATATTGACATCAAAAAAGCAAAGGGATGTATGGACCGGGTCATC
1030	argD	AAGCTTTGCTCGAAGAAACTATGAGATCTTGTCTTTTTCTGCAACAGCGGCGCGGAGGCGAATGAAGGTGCGATAAAGTGTATGGACCGGGTCATC
1031	argD	AAGCTTTGCTCGAAGAAACTATGAATCCGAGGTAAAGGATTAATGCTTGGAATTGAGTGTGATGGCCCGGTTGCTGACATTATTGTATGGACCGGGTCATC
1032	argD	AAGCTTTGCTCGAAGAAACTATGAACGTGATTCGGCTGCTGCCGCCGCTCACCGTGACTAAGGATGAAATAGCAGAAGTGTATGGACCGGGTCATC
1033	argD	AAGCTTTGCTCGAAGAAACTATGAAACAAAAATCATCACTTTTCTTCAGTCGTTCCATGGCCGCACGTATGCAGGGATTGTATGGACCGGGTCATC
1034	argF	AAGCTTTGCTCGAAGAAACTATGTTATTCTGATGTGTTTACAAGCATGGGGCAGGAAGCGGAAGAGCAAGAACGTCTTGTGTATGGACCGGGTCATC
1035	argF	AAGCTTTGCTCGAAGAAACTATGGGACCTTAGTGAAGAAGATATAAACGCCTTGCTCGCAGAAGCCGGTGAGCTGAAACATGTATGGACCGGGTCATC
1036	argF	AAGCTTTGCTCGAAGAAACTATGCTTGCCAAAGAAGCTGACATTCCGGTGATCAATGGACTTACCGATAAATACCACCCATGTGTATGGACCGGGTCATC
1037	argF	AAGCTTTGCTCGAAGAAACTATGCGCGAAAATGGGCTGTGATATCTCGATCGCTTCACCAAAGGGATATGAAGTGTTAGATGTATGGACCGGGTCATC
1038	argF	AAGCTTTGCTCGAAGAAACTATGCAGCTGAAGCGGCAAAGACATATGCACTTCAATCCGGCTCTTCTGTCACGCTGACTGTATGGACCGGGTCATC
1039	argF	AAGCTTTGCTCGAAGAAACTATGATGGCGCAGCTGGGCGGGAGCGCCCTCTTTCTAAGCCAGAAAGATCTGCAGCTGGTGTATGGACCGGGTCATC
1040	argF	AAGCTTTGCTCGAAGAAACTATGAGATTATTGACGGGCCGAACTCTGCAGTGTTCCAGCAGGCGGAAAACCGTCTTCATTGTATGGACCGGGTCATC
1041	argF	AAGCTTTGCTCGAAGAAACTATGAGACTGTCGCTGATACGGCAAAAGTGCTGTCAGGCTATGTGGATGCCATCATGATTGTATGGACCGGGTCATC
1042	argF	AAGCTTTGCTCGAAGAAACTATGAAGCCTGACTATACATTTTTACATTGTCTCCCTGCGCATCGCGAGGAAGAAGTGACTGCTGTATGGACCGGGTCATC
1043	argF	AAGCTTTGCTCGAAGAAACTATGAAATTCAGCCTATATTCCATGGCAAAACCTTGGCGATGATTTTTGAAAAATCATCAACGCTGTATGGACCGGGTCATC
1044	argF	AAGCTTTGCTCGAAGAAACTATGAAAAGGGAAGCTTAAAGGCGTAAAAGTCGCGTACATCGGTGACGGAAATAACGTGGCTGTATGGACCGGGTCATC
1045	argF	AAGCTTTGCTCGAAGAAACTATGAAAAAGCACTGCTGAAGGCCATTTTATATAAAGGGGAATCATCAAAAAACTGCTGATGTATGGACCGGGTCATC
1046	argG	AAGCTTTGCTCGAAGAAACTATGTTTGACACTGGTGAAAGAGGTAGCCCACTTTAAACCGATCATCGAGCAAAAAATGTCAGATGTATGGACCGGGTCATC
1047	argG	AAGCTTTGCTCGAAGAAACTATGTGAAAAACTTGCAACATATACAAAAGACGATGCATTTGATCACCATGCAGCAATCGGATGTATGGACCGGGTCATC
1048	argG	AAGCTTTGCTCGAAGAAACTATGTCATTTACAACGGCTTATGGTTCTCACCGTTAAAAGACGCGCTGCACGCTTTCTTTGTATGGACCGGGTCATC
1049	argG	AAGCTTTGCTCGAAGAAACTATGTATCGAGCTTTGGGGACTTCCGACAAAAGTGAACAGCATCGTGAAAAAGAAGGAGCTGTATGGACCGGGTCATC
1050	argG	AAGCTTTGCTCGAAGAAACTATGGCGGCATTTTAGAAGATCCATGGGCGGCGCCGCCAGAAGGTGCATACGATTTAACTGTATGGACCGGGTCATC
1051	argG	AAGCTTTGCTCGAAGAAACTATGGCATTAAATCCCGGGAAGTATACGAATGCCCTGGTGCGATGACACTGATCAAAGCTGTATGGACCGGGTCATC
1052	argG	AAGCTTTGCTCGAAGAAACTATGGATTACGCGCTTATCTCTTTGCAGGCCCACACAATGTATGAAGGAAAATACCCGCTTGTTTGTATGGACCGGGTCATC
1053	argG	AAGCTTTGCTCGAAGAAACTATGGAAAAAGAAGATGCACAGGCGATTGCCCACGGATGCACAGGGAAAGGAAATGACCTGTATGGACCGGGTCATC
1054	argG	AAGCTTTGCTCGAAGAAACTATGCGAAGTCTCCATTAAATCATTAAACCCTGACCTAGAAGTCATCGCGCCGGTTCGCTGTATGGACCGGGTCATC
1055	argG	AAGCTTTGCTCGAAGAAACTATGCATTGTCCGCGTGAAGCTGTTTAAAGGCCATGCAATTGTAGAAGGACGTAAATCGGAATATGTATGGACCGGGTCATC
1056	argG	AAGCTTTGCTCGAAGAAACTATGATTTGAACAGGGCGTGCCTGTCTCCATTGACGGTGTTTCCTACTCGCTTTCTGAGTGTATGGACCGGGTCATC
1057	argG	AAGCTTTGCTCGAAGAAACTATGATATAATGTAATCGCCTGCTGCCTGGATGTCGGTGAGGGCAAAGATTTGGCATTTTGTATGGACCGGGTCATC
1058	argG	AAGCTTTGCTCGAAGAAACTATGAAATTGAATATGCGGCTAGCCGCGGCATTCCGATTCCGATCAATCTTGACAGCCCTGTATGGACCGGGTCATC
1059	argG	AAGCTTTGCTCGAAGAAACTATGAAAAGTCGTATTAGCATACTCAGGAGGTCTTGATACTTCCGTCGCAATAAAATGGCTTCATGTATGGACCGGGTCATC
1060	argH	AAGCTTTGCTCGAAGAAACTATGTAGACCCTTACTACGCAGTTGAAAAAAGAATGAGCGCCGGGGGCACCGGATTCAAACTGTATGGACCGGGTCATC
1061	argH	AAGCTTTGCTCGAAGAAACTATGGGCGCGTCCATATCATTTGACCAAAATTTAGTTGCTGAAGACATTACAGGGTCTCTCGCTGTATGGACCGGGTCATC
1062	argH	AAGCTTTGCTCGAAGAAACTATGGCTGAAAAAATGCGGTATTCTGACAGCAGAAGAAGAGTTGAAAATCCGAGAGGGCCTGTGTATGGACCGGGTCATC
1063	argH	AAGCTTTGCTCGAAGAAACTATGGATTTCATTCGCTCACCATCTGCTTGCGTATTTCTGGATGCTTGAGCGCGACAAGTGTATGGACCGGGTCATC
1064	argH	AAGCTTTGCTCGAAGAAACTATGGAAGCCGGAATGACCAGGTGGCGACTGACATGCATTTATACTTGAAGAATCATGTCTGTATGGACCGGGTCATC
1065	argH	AAGCTTTGCTCGAAGAAACTATGCTTCCCAATTGACCGTGATTATTCAGCGGAACTGCTCGGCTTTGATGCCATTTATTGTATGGACCGGGTCATC
1066	argH	AAGCTTTGCTCGAAGAAACTATGATGCCGTTTGGCGAGTTTCAGCAGGCGAGCACACTATTTGAAGAAGATATTTACACTGTGTGTATGGACCGGGTCATC
1067	argH	AAGCTTTGCTCGAAGAAACTATGATGAAGCAAGCAACAAAACAAGACTTTTCAAACGCGACGGAACTGGCCGATTATTTAGCTGTATGGACCGGGTCATC
1068	argH	AAGCTTTGCTCGAAGAAACTATGATATTCATTTGAACATTGAGAAAATGCTCATTGACGAAATCGGTCCTCTTGGCGGCAATGTATGGACCGGGTCATC
1069	argH	AAGCTTTGCTCGAAGAAACTATGAGTTTAAATTCATCGAGCTTGACGATACGTACGCAACAGGAAGCAGCATGATGCCGTGTATGGACCGGGTCATC
1070	argH	AAGCTTTGCTCGAAGAAACTATGAGCTTGGACGGCGTCAGCGACAGAGACTTCATTTTGGAGTTTTTAAGCAACAGCAGTATTGTATGGACCGGGTCATC
1071	argH	AAGCTTTGCTCGAAGAAACTATGAGCGCATGAAGTGGTCGGGAAACTTGTGTACACATGCATCGAAAGAGGGATCTATTTTGTATGGACCGGGTCATC
1072	argH	AAGCTTTGCTCGAAGAAACTATGACAGGACGCGTATACGGCGATATGATGGGGCTGTTTACGATCATGAAAGGACTTCTGTATGGACCGGGTCATC
1073	argH	AAGCTTTGCTCGAAGAAACTATGACAACAAAGATCTGCAGGAAGACAAAGAGGGCATGTTTGACACGGTGAAAACGGTTGTATGGACCGGGTCATC
1074	argJ	AAGCTTTGCTCGAAGAAACTATGTTGGCGGCCAATGCCTGTTTAAGAATAACGAACCTCAGCCATTCTCTGAATCTATCGTGTATGGACCGGGTCATC
1075	argJ	AAGCTTTGCTCGAAGAAACTATGTTGAGGAAGCGATTTTAACAACTGATACGGTGATCAAGCAGACGTGCTATGAACTGGCATGTATGGACCGGGTCATC
1076	argJ	AAGCTTTGCTCGAAGAAACTATGTTATACCCAAAGCCACTTTCAGGCTGCTCCGATCAAAGTGACACAAGACAGCTTAAAGCATGTATGGACCGGGTCATC
1077	argJ	AAGCTTTGCTCGAAGAAACTATGGGGAGAGCGTGGGGCTGTGACCTGACCTATGACTATATCAAAATTAACGCGAGCTATCGTGTATGGACCGGGTCATC
1078	argJ	AAGCTTTGCTCGAAGAAACTATGGGAAATCACTGACGTTTCATTTAACCAAATCACAGTTGACGGAGAAACATCCACGAACGATGTATGGACCGGGTCATC
1079	argJ	AAGCTTTGCTCGAAGAAACTATGGCCTGCACGGGAGAACAGGGCTTAAAGGACGCATACACAATGCGGGAGAGCTTTGTGTATGGACCGGGTCATC
1080	argJ	AAGCTTTGCTCGAAGAAACTATGGAATACCTTGAAGGAGATGAAATCACCATTGTCATCAAGATGGCTGAAGGGGACGGATGTATGGACCGGGTCATC
1081	argJ	AAGCTTTGCTCGAAGAAACTATGCTCTGGGATGATACACCCGAACATGGCCACGATGCTGGGATTTGTGACAACTGACTGTATGGACCGGGTCATC
1082	argJ	AAGCTTTGCTCGAAGAAACTATGCTCAAATCTTGTAAAAACGGCAGTATACGGAACAGATGCCAACTGGGGGCGGATCTGTATGGACCGGGTCATC
1083	argJ	AAGCTTTGCTCGAAGAAACTATGCTAAAGAGATTGCCAGAGACGGAGAAGGCGCGACAAAACTAATTGAAGCCCAAGTACAGGTGTATGGACCGGGTCATC
1084	argJ	AAGCTTTGCTCGAAGAAACTATGCATTTAGACATGGAAAAAATCCACGCGGGGATCGAACTGCTGAAAGAAACACCTGTGTATGGACCGGGTCATC
1085	argJ	AAGCTTTGCTCGAAGAAACTATGATGGTATTAGTTATGGCGAATGGCTGCGCCGAAAACGAGTGCCTGACAGAAGACCTGTATGGACCGGGTCATC
1086	argJ	AAGCTTTGCTCGAAGAAACTATGAAGTGAAGATCAAATTGTAAAAGTAACAGGTGATGTATCCTCGCCAAAAGGGTTTCAGGCTGTATGGACCGGGTCATC
1087	argJ	AAGCTTTGCTCGAAGAAACTATGAAAGGGTGTGCATTGCGGACTGCGCTACTCGAAAAAAGACCTCGGCGTCATTATCTGTATGGACCGGGTCATC
1088	argS	AAGCTTTGCTCGAAGAAACTATGTTGGTTCCGTTCCACGACTTTCGGCGATGATAAAGACCGCGTATTGATCAAGAAGTGTATGGACCGGGTCATC
1089	argS	AAGCTTTGCTCGAAGAAACTATGTGAACAATCAATATTTAACAAAGCTGATTCCGTCTGTACTGGAAGCAGGGGAAGCATACGTGTATGGACCGGGTCATC
1090	argS	AAGCTTTGCTCGAAGAAACTATGTCGGAAAGCGTCTCGCTGAGGAATACGGTGATCGTTTCGTTAACGAAGAGGAAAGTTGTATGGACCGGGTCATC
1091	argS	AAGCTTTGCTCGAAGAAACTATGGGGAAACGAACATCGGAAACGGTGAACGAGTTCAGGTAGAATTCGTATCAGCGAATGTATGGACCGGGTCATC
1092	argS	AAGCTTTGCTCGAAGAAACTATGGGACTTGGAAAACTTCCGTGTGCCGTTTGATGTGTGGTATTCAGAAACTTCACTGTACCATGTATGGACCGGGTCATC
1093	argS	AAGCTTTGCTCGAAGAAACTATGGGAAACCAAATCAACAATCTGGCGCTTTCTGTTGAAGTCCGTTACTTTGAAGCACTCGTGTATGGACCGGGTCATC
1094	argS	AAGCTTTGCTCGAAGAAACTATGGATTCCTTGTGCAACGTGCTTTCAAAAGCGGGTTACGATGTAAGCCGCGAATACTATGTATGGACCGGGTCATC
1095	argS	AAGCTTTGCTCGAAGAAACTATGGAAAGATAAAACACACGGCGACTACTCAACGAATATGGCGATGCAGTTGGCAAGAGTGTGTATGGACCGGGTCATC
1096	argS	AAGCTTTGCTCGAAGAAACTATGCGTACCTTCTTCCTGATATCGCGTATCATAAGGACAAGCTTGACCGCGGCTTTGATAAGCTGTATGGACCGGGTCATC
1097	argS	AAGCTTTGCTCGAAGAAACTATGCGAATTCCGCACCGTGTCACTAACTATATTTATGATCTGGCTTCTGCTCTGCACAGCTTCTGTATGGACCGGGTCATC
1098	argS	AAGCTTTGCTCGAAGAAACTATGCCGTGCGTTACTTCTTTGCAATGCGAAGTGCAGACACCCATATGGATTTTGACTTTGTATGGACCGGGTCATC
1099	argS	AAGCTTTGCTCGAAGAAACTATGCAACATCTAACGAAAACCCTGTGTATTATGCACAATACGCGCATGCCCGTATTTGCATGTATGGACCGGGTCATC
1100	argS	AAGCTTTGCTCGAAGAAACTATGAGATTGTCGCCCATTTTGATAAAGGGAAGGCTTCGATTGAAAAACTGGATATCGCCGTGTATGGACCGGGTCATC
1101	argS	AAGCTTTGCTCGAAGAAACTATGAAAAATCGACAAGGCGCTTGAAGCGCTCCGCGAAAAAGGCCACGTCTATGAAGAAGTGTATGGACCGGGTCATC
1102	aroA	AAGCTTTGCTCGAAGAAACTATGTGAGCAACACAGAGTTAGAGCTTTTAAGGCAGAAAGCAGACGAATTAAACCTACAAATTTTGTATGGACCGGGTCATC
1103	aroA	AAGCTTTGCTCGAAGAAACTATGTCAGTGAAATCGTAACTCCGGCTCATATCGAAGAAGCGCTGGACTACATTGATGTCATTCTGTATGGACCGGGTCATC
1104	aroA	AAGCTTTGCTCGAAGAAACTATGGTCACAAGGAAATGACCAAATTATCCTTTGTGAGCGCGGAATCAGAACATATGAAACAGCTGTATGGACCGGGTCATC
1105	aroA	AAGCTTTGCTCGAAGAAACTATGGCTTGGTGTTGAAGGCCTTCAAATTTTAAAACGTGTAGCGGATGAATTTGATCTGGCGTGTATGGACCGGGTCATC
1106	aroA	AAGCTTTGCTCGAAGAAACTATGGCCGCTTTAGCGATCGGTGCTGATGGCGTAATGGCTGAGGTTCACCCTGATCCGTTGTATGGACCGGGTCATC
1107	aroA	AAGCTTTGCTCGAAGAAACTATGGCACTTTCTGACTCTGCTCAGCAAATGGCGATTCCTGAATTCGAAAAATGGCTGAATTGTATGGACCGGGTCATC
1108	aroA	AAGCTTTGCTCGAAGAAACTATGGCACAGGGTGTCAACCGATTTGACCCTGTCAGAGAACGCACAATGTTAAACAATATCATTTGTATGGACCGGGTCATC
1109	aroA	AAGCTTTGCTCGAAGAAACTATGGACGGGCCGTTCGAAAATTCAACCATCCAGCACATTTTTAAAGAGATATTCAAAGCCGTGTATGGACCGGGTCATC
1110	aroA	AAGCTTTGCTCGAAGAAACTATGGAAGAAGATCACAGCAAAGCGCTGCTTGTCTCCCGCAAGAAAAAACCTGAAGATACATGTATGGACCGGGTCATC
1111	aroA	AAGCTTTGCTCGAAGAAACTATGGAAAAAGCCAGTGCTTCTGAAGCGCGGTCTTGCTGCAACGATCTCTGAATTCATCTGTATGGACCGGGTCATC
1112	aroA	AAGCTTTGCTCGAAGAAACTATGCTGTGCCGATTTTGAAACAAGAAACGCATTTGCCAGTCTTTGTTGATGTTACGCATGTATGGACCGGGTCATC
1113	aroA	AAGCTTTGCTCGAAGAAACTATGCAAAGATTCATTGTCGGCCCATGTGCGGTAGAGAGCTATGAGCAGGTAGCTGAAGTGTATGGACCGGGTCATC
1114	aroA	AAGCTTTGCTCGAAGAAACTATGAGGGATTAAAATTTTGCGCGGTGGAGCCTTTAAGCCTCGTACGAGCCCATACGATTGTATGGACCGGGTCATC
1115	aroB	AAGCTTTGCTCGAAGAAACTATGTTATCAGCCGAAAGCCGTGCTCTATGATACAGATTTCCTGCGTTCTCTGCCTGAAAAATGTATGGACCGGGTCATC
1116	aroB	AAGCTTTGCTCGAAGAAACTATGTGAATGACATGATTTTTAAAGGCATTTCAATTAAAGCGTCTGTCGTTCAGCAGGATGAAATGTATGGACCGGGTCATC
1117	aroB	AAGCTTTGCTCGAAGAAACTATGTGAACCGTATGATGAATGATAAGAAAACCCGTGGCGGGAAGATTCAGTTTATTGTGCTCATGTATGGACCGGGTCATC
1118	aroB	AAGCTTTGCTCGAAGAAACTATGTCACTCACGGTGATGCCGTAGCCCTCGGAATGCAGTTTGCTTTATATATAAGCGAAAAGATGTATGGACCGGGTCATC
1119	aroB	AAGCTTTGCTCGAAGAAACTATGGTTGTAGGGGATCTTGCCGGTTTTGTGGCTGCCACTTTTATGCGCGGCATTGATTTTGTATGGACCGGGTCATC
1120	aroB	AAGCTTTGCTCGAAGAAACTATGGGCAGAAGTGATTAAACACGCTTTTATCTATGACAGAGCGTTTCTGGAGGAGCTGCTGAATGTATGGACCGGGTCATC
1121	aroB	AAGCTTTGCTCGAAGAAACTATGGAGTGAAGCGATTCGTTTTCATATGGATCGCTCCTCATGCATCATCGCATTCGGTTGTATGGACCGGGTCATC
1122	aroB	AAGCTTTGCTCGAAGAAACTATGGAAAGTTGCTGATCATACATTTTCCAGAAATGAACTTGAGAGCTGGCTGAACAAATGGCGTGTATGGACCGGGTCATC
1123	aroB	AAGCTTTGCTCGAAGAAACTATGCTGCTTCCTCGTCATATCCTGTTTTTATCGGACAAGGTATCAGAAAAAAGGCTTGCGAACTGTATGGACCGGGTCATC
1124	aroB	AAGCTTTGCTCGAAGAAACTATGAGAAGAGGGGATAAGAGCTTACTTAAACTTTGGGCATACGCTCGGCCATGCCGTTGAGTGTATGGACCGGGTCATC
1125	aroB	AAGCTTTGCTCGAAGAAACTATGACGTTTGGTCAGCTGGCTAAAAAGCCTGGGTTATCCAAGTCAAATCAGAAAAGAGACGGATGTATGGACCGGGTCATC
1126	aroB	AAGCTTTGCTCGAAGAAACTATGACCTCTTTAAACAGGCCTTTAACAAGGATTATGTTTGTCACGGATGAAGAAGTGGACCGCTGTATGGACCGGGTCATC
1127	aroB	AAGCTTTGCTCGAAGAAACTATGACAGCGCAGTCGGAGGAAAAGTAGCCGTGAACCATCCGCTTGGAAAAAATCTAATTGTATGGACCGGGTCATC
1128	aroB	AAGCTTTGCTCGAAGAAACTATGAAAAAGTGACGGTACCGAGTGGAGAGCAGGCAAAATCCATGGACATGTACACAAAATTGTGTATGGACCGGGTCATC
1129	aroC	AAGCTTTGCTCGAAGAAACTATGTTTGAAAAAGCGAATGACAGAGAAGCGGTCACAAAGCTCATTTCTAAGCTTCGTAAATCTTGTATGGACCGGGTCATC
1130	aroC	AAGCTTTGCTCGAAGAAACTATGTGGGAAAGACGGAAAAACAAATTCTGAATGAAGCAGAGGCAGTAAAATTACTGAATCCGGTGTATGGACCGGGTCATC
1131	aroC	AAGCTTTGCTCGAAGAAACTATGTGCGACGTATACAATGAAAACAATATATGCAGACCGCCCCATTATTACAATGTCAATGGCTGTATGGACCGGGTCATC
1132	aroC	AAGCTTTGCTCGAAGAAACTATGGAAGAGGCGTCCGCACCAGGCCAAATTCCTGTTTCTGAGCTAAGGAGTGTCTTAGATATGTATGGACCGGGTCATC
1133	aroC	AAGCTTTGCTCGAAGAAACTATGCTTGCTTTGCTGGAATCGGCAATCCAAACAAAAGACATCGATCTGATAGACATCGAATGTATGGACCGGGTCATC
1134	aroC	AAGCTTTGCTCGAAGAAACTATGCTATTTACATTCAGAACCCACAAAGAGGGCGGGAGCATGGAGATGGACGAAAGCTTGTATGGACCGGGTCATC
1135	aroC	AAGCTTTGCTCGAAGAAACTATGATTTCCAGACTTCGAAAAATGCAGGACTTAGGCGCGCATATTCCAAAAATGGCTGTCTGTATGGACCGGGTCATC
1136	aroC	AAGCTTTGCTCGAAGAAACTATGACGTGTTAACGATTAAAGGAGTTTCCATCGGGGAAGGGATGCCGAAAATCATCATTCCTGTATGGACCGGGTCATC
1137	aroC	AAGCTTTGCTCGAAGAAACTATGAACAGGGCTCATCAGCAGGCTGAGCGGTGAGGTTTTTGGATCGGCTTGTACTTTTTGTATGGACCGGGTCATC
1138	aroC	AAGCTTTGCTCGAAGAAACTATGAAAGCGTTAGTATCGCTGGCGGAAGAAAACAACGTCTATGTGGTGATGTCAAATCACGACTGTATGGACCGGGTCATC
1139	aroD	AAGCTTTGCTCGAAGAAACTATGTTACAGCGTGCCGCGAGCAGTGCCGTCGTATGTGATATCGTGTATAATCCAATACTGTATGGACCGGGTCATC
1140	aroD	AAGCTTTGCTCGAAGAAACTATGTGTCCGAAATACCCCGAAAAAATTTGACATTTGCAACCGGACGTTAGAAAAAGCAAAGCTGTATGGACCGGGTCATC
1141	aroD	AAGCTTTGCTCGAAGAAACTATGTGAGCAGTATGATGTTATCATCCATACAACGTCTGTGGGCATGTATCCGAACGTGGACTGTATGGACCGGGTCATC
1142	aroD	AAGCTTTGCTCGAAGAAACTATGTGAAGGTATTAGACAAGCCCATCTCTGAACTGTCATTCTTAATGATCGGCGCTGGCGTGTATGGACCGGGTCATC
1143	aroD	AAGCTTTGCTCGAAGAAACTATGTAAAAGAAGCAAGCCAAAAAGGCTTGAAAACACTCGATGGTGTGGGCATGTTTGTTGTGTATGGACCGGGTCATC
1144	aroD	AAGCTTTGCTCGAAGAAACTATGGGCAGCATTGTCTTTCCAATTGTGGACTGGACAAGAGCCTAATATTGAAAAAATGAGATCTGTATGGACCGGGTCATC
1145	aroD	AAGCTTTGCTCGAAGAAACTATGGCTTACAGAAGCTACTCCCTCGTTTCACAATAAAGAAGTATTAAGCATAAAAGAAGCAGATGTATGGACCGGGTCATC
1146	aroD	AAGCTTTGCTCGAAGAAACTATGCACCTGATATTCATAACGCATCATTGAAAGACCTCGGGCTTGACGGACATTATCATGCTGTATGGACCGGGTCATC
1147	aroD	AAGCTTTGCTCGAAGAAACTATGAAGAGCTCTAGGCGTACAAGGAATCAATGTGACTGTTCCGCACAAGGTTTCCATTATGGATGTATGGACCGGGTCATC
1148	aroD	AAGCTTTGCTCGAAGAAACTATGAAACACGGTCAGAAGAGAGGGAGATAAGCTTGTCGGATACAATACCGATGGGGAAGGCTTGTATGGACCGGGTCATC
1149	aroE	AAGCTTTGCTCGAAGAAACTATGTTCAGGTACAACGATTCGCCTGATGCTCGGAATATTGGCGGGCCGTCCTTTTTACTGTATGGACCGGGTCATC
1150	aroE	AAGCTTTGCTCGAAGAAACTATGTGTCAGTGAGCGGCGCTTCATTAAAAGGAATTGATTATGTATCACCTGTTGCAAGCGTGTATGGACCGGGTCATC
1151	aroE	AAGCTTTGCTCGAAGAAACTATGTGCTGATAGCGGTGCAGAGCCTTATGGAGATTTGATTATAGAAACGTCATCTCTAAAGGCTGTATGGACCGGGTCATC
1152	aroE	AAGCTTTGCTCGAAGAAACTATGTATTGATACTGTTGTTTCTGAGCTTCGCAAGCTGGGTGCTGAAATTGAACCGACAGCTGTATGGACCGGGTCATC
1153	aroE	AAGCTTTGCTCGAAGAAACTATGGCTGGTGGCCAGAAACTGACAGCTGCTGATATTTTTGTTCCTGGAGACATTTCTTCATGTATGGACCGGGTCATC
1154	aroE	AAGCTTTGCTCGAAGAAACTATGCTTGCTGCTGGCGCGATGGTTCCAAACAGCAGAATTGTATTGAAAAACGTAGGTTTGTATGGACCGGGTCATC
1155	aroE	AAGCTTTGCTCGAAGAAACTATGCCGACTCGGACAGGTATTATTGATGTCCTTCAAAACATGGGGGCAAAACTTGAAATCAAATGTATGGACCGGGTCATC
1156	aroE	AAGCTTTGCTCGAAGAAACTATGCAGGCACAACAACAGTTAAAAACTTTCTGCCGGGAGCAGATTGTCTGAGCACGATTGTATGGACCGGGTCATC
1157	aroE	AAGCTTTGCTCGAAGAAACTATGCACGGAGATCATCGAATCGGAATGATGCTTGGTATTGCTTCCTGTATAACGGAGGATGTATGGACCGGGTCATC
1158	aroE	AAGCTTTGCTCGAAGAAACTATGATTGAAATCGAGCACACGGATGCCATTCACGTTTCTTATCCAACCTTCTTCGAGCTGTATGGACCGGGTCATC
1159	aroE	AAGCTTTGCTCGAAGAAACTATGATGAGAGCATTGCGAAACGCCCAATGAAGCGTGTGACTGAGCCTTTGAAAAAAATTGTATGGACCGGGTCATC
1160	aroE	AAGCTTTGCTCGAAGAAACTATGAGAAAAATGGGTGTTCACATTGAGCAAAGCAGCAGCGATGTCGTGATTCACGGAAAAGTGTATGGACCGGGTCATC
1161	aroE	AAGCTTTGCTCGAAGAAACTATGACTCAGGCGGAAGGAACCACCGTTATTAAGGACGCGGCAGAGCTAAAAGTGAAAGTGTATGGACCGGGTCATC
1162	aroE	AAGCTTTGCTCGAAGAAACTATGACAACAACTGTAACAGAGCCCCATAAATCTCGGGACCACACTGAGCGGATGCTTTTGTATGGACCGGGTCATC
1163	aroF	AAGCTTTGCTCGAAGAAACTATGGTCAATTAACGCATTTAAAGGTGTGGAATTCGGCATCGGATTTGAGGCAGCAGGGTGTATGGACCGGGTCATC
1164	aroF	AAGCTTTGCTCGAAGAAACTATGGCGGGCCACGTGTTGCAAATTGGCGCTGTTAAAGCTGAAAAAACAGAGTATACGTTGTATGGACCGGGTCATC
1165	aroF	AAGCTTTGCTCGAAGAAACTATGGCGGAGTCATGAAGCCGATTCCGACTTTGTATAAACCGCTGAAAAGTGTCGATATTGAAATGTATGGACCGGGTCATC
1166	aroF	AAGCTTTGCTCGAAGAAACTATGGCCGCGGCCGCCGCATGCAGATCGAAAAAGACCAGGCCAAAATTATGAGCGGGGTTGTATGGACCGGGTCATC
1167	aroF	AAGCTTTGCTCGAAGAAACTATGGCACGTACACTCGGTTCGCCAATTGCTCTCGTAGTTGAAAATAACGATTGGAAGCATGTATGGACCGGGTCATC
1168	aroF	AAGCTTTGCTCGAAGAAACTATGGAGATCATTTGGGACGAGGAAAAAGGATACACCCGTGCTACTAACAGACTTGGCGGATGTATGGACCGGGTCATC
1169	aroF	AAGCTTTGCTCGAAGAAACTATGCTGTCGCTTGGGAAATTGCGAACGCAGTCGTTGAACAATTCGGATTAGATCAAATTGTATGGACCGGGTCATC
1170	aroF	AAGCTTTGCTCGAAGAAACTATGCTGTCAGAGTGGCGGCAGGGGCTGTAGCTAAAAAGATTCTTTCTGAGCTTGGCATTAAGTGTATGGACCGGGTCATC
1171	aroF	AAGCTTTGCTCGAAGAAACTATGCGAAAGAACCGTTTTCTGCCAGCATTGAACGTTCAGACAGCTGTGCTGTTCCTGCTGTATGGACCGGGTCATC
1172	aroF	AAGCTTTGCTCGAAGAAACTATGCCAGATTTCCAGACCGAGACCTGGGCACGCTGACTTAAACGGTGCAATTAAATATAATCATGTATGGACCGGGTCATC
1173	aroF	AAGCTTTGCTCGAAGAAACTATGCCAACTGACAACCATTATTGAGGGTGTACCTGCCGGGCTTTACATAACGGAGGAAGATGTATGGACCGGGTCATC
1174	aroF	AAGCTTTGCTCGAAGAAACTATGATAGTAGAAGTCATTGTCGAGGGAATGCCGGTAGGCGTGGGCAGCTATGTCCATTTGTATGGACCGGGTCATC
1175	aroF	AAGCTTTGCTCGAAGAAACTATGAGACTTGCAGCGTGTAACGGAAGAGTCTCCTGTCAGATGCTACGATGAAGAGGCATGTATGGACCGGGTCATC
1176	aroH	AAGCTTTGCTCGAAGAAACTATGTTTAGAAAAAGTTGTCGTATTGAGGCCCGATTTATCATTGACAAAAAATACTGAATTGTTGTATGGACCGGGTCATC
1177	aroH	AAGCTTTGCTCGAAGAAACTATGTGGCAGTATGTACCGGTAACATGTATGCAGGAAATGGACGTAACAGGCGGTCTGAATGTATGGACCGGGTCATC
1178	aroH	AAGCTTTGCTCGAAGAAACTATGTGCATAAGAGTCATGATGACGGTCCAGACAGATGTCCCTCAGGATCAGATCAGACATTGTATGGACCGGGTCATC
1179	aroH	AAGCTTTGCTCGAAGAAACTATGATGATGATTCGCGGAATTCGCGGAGCAACTACAGTTGAACGGGATACTGAAGAAGTGTATGGACCGGGTCATC
1180	aroH	AAGCTTTGCTCGAAGAAACTATGATACAAAACCGGAAGATGTTGTTCAAATGCTTCTGTCGGCTACACCTGATTTGCACGTGTATGGACCGGGTCATC
1181	aroK	AAGCTTTGCTCGAAGAAACTATGTTCAATATGTCAATTCCTGAGATATTTGAGAAAAAGGGAGAAGACTTTTTCCGGAAAACGTGTATGGACCGGGTCATC
1182	aroK	AAGCTTTGCTCGAAGAAACTATGTGATCGGATTCATGGGTGTAGGAAAAACAACAATCGGCCAATTGGTCGCTAAAAAATGTATGGACCGGGTCATC
1183	aroK	AAGCTTTGCTCGAAGAAACTATGGCCGATTACATTGTTGAGACATTAAAAATTGGCTGGGATCTTTATCAGCCGATGTTGTATGGACCGGGTCATC
1184	aroK	AAGCTTTGCTCGAAGAAACTATGGAAATTGCTGTCTGGAAAACTGTCTCGTGCTTCATCTGGACCTGTCATGGGAGAACTTGTATGGACCGGGTCATC
1185	aroK	AAGCTTTGCTCGAAGAAACTATGCTGCCATCATAAACGATTCAAAATCGTATCTCTGGGCGGGGGATCTTTTAAACAAGAAGATGTATGGACCGGGTCATC
1186	aroK	AAGCTTTGCTCGAAGAAACTATGAGTCATTTATGACAAGCACAATTCAAAAGTGGCAACAGACAACCTTTCCCCGGAAGAGGTGTATGGACCGGGTCATC
1187	aroK	AAGCTTTGCTCGAAGAAACTATGAGCGCGCGGATTTATTGATCGAAAGCCGCCCTGTACTGCATAACCGTTCAATGGATTGTATGGACCGGGTCATC
1188	arsB	AAGCTTTGCTCGAAGAAACTATGTTTCTTGCGATGGCATTGGGGATAGGATTAGGTTTTATATTTCCGAGTTTTGTTGGTGGATGTATGGACCGGGTCATC
1189	arsB	AAGCTTTGCTCGAAGAAACTATGTGATGTATCCACCACTAGCAAAGGTTCGATATGAAGAAATTGGACGGGTATTTAAAGATGTATGGACCGGGTCATC
1190	arsB	AAGCTTTGCTCGAAGAAACTATGTGATGTAATTGTTAGCTTGCCGTTAGATGTTGTCCGAGTTGCGATTCCATTATTGATGTATGGACCGGGTCATC
1191	arsB	AAGCTTTGCTCGAAGAAACTATGTAAACCGGAGTATATGATTGGGCTTATTATGATTGGATTAGCTCGCTGTATTGCGATGGTTGTATGGACCGGGTCATC
1192	arsB	AAGCTTTGCTCGAAGAAACTATGGTGCAAAACTGGATCATCGGACCGACTCTCATGTTTATTTTGGCTATCATCTTTTTGCCATGTATGGACCGGGTCATC
1193	arsB	AAGCTTTGCTCGAAGAAACTATGGTAACAGTTATTCCGCAATGGTTAGGGATGGAAGGAGCAGTAGTGAATATTACGATGGCATGTATGGACCGGGTCATC
1194	arsB	AAGCTTTGCTCGAAGAAACTATGGGGAAGAAAATCGGGGCAAACTATGCTGTAACTACTACTTTAGCTTTTACAGCAGGAAGCTGTATGGACCGGGTCATC
1195	arsB	AAGCTTTGCTCGAAGAAACTATGCGCCGTAATTGGTCCGCTTGTAGAAGTGCCAGTCATGATAGCACTTGTTAAGGTTGCTTGTATGGACCGGGTCATC
1196	arsB	AAGCTTTGCTCGAAGAAACTATGCAGTATTCATTTACCTTGGAGTTCCTTTTATTGCAGGAATGGTGACACGTTATATTTTTGTGTATGGACCGGGTCATC
1197	arsB	AAGCTTTGCTCGAAGAAACTATGCAAAAGGTGATACGGAATACGCGGCAGGATTAGTTGCTTTCAACTCAATTTTCCAAATGCTGTATGGACCGGGTCATC
1198	arsB	AAGCTTTGCTCGAAGAAACTATGACTTTGAATTAGCGATTGCTGTAGCTGTTGGTGTATTTGGAATTCATTCGGGTGCAGCATGTATGGACCGGGTCATC
1199	arsB	AAGCTTTGCTCGAAGAAACTATGAAAGTGAAGGGCAAAGAATGGTATGAAAAAGTGTTCATTCCTAAGATTAGTCCAATTACGTGTATGGACCGGGTCATC
1200	arsC	AAGCTTTGCTCGAAGAAACTATGTCGATTCTGATATTCTGAACAATGCTGATTTAGTTGTTACGCTTTGTGGAGATGCTGCTGTGTATGGACCGGGTCATC
1201	arsC	AAGCTTTGCTCGAAGAAACTATGGCACAAGGGACAGAAGAAGAAAAATGGGCGTTTTTCCAAAGAGTTCGTGATGAAATAGGGTGTATGGACCGGGTCATC
1202	arsC	AAGCTTTGCTCGAAGAAACTATGATAAATGCCCGATGACGCCTCCACATGTAAAACGTGAGCATTGGGGTTTTGATGATTGTATGGACCGGGTCATC
1203	arsC	AAGCTTTGCTCGAAGAAACTATGAGGTGATGAGTGGAAAGTGTATAGCGCGGGGATAGAAGCACATGGATTAAATCCGAATGCTGTATGGACCGGGTCATC
1204	arsC	AAGCTTTGCTCGAAGAAACTATGAATCATTTACTTTTTATGTACAGGGAACTCTTGCCGGAGCCAAATGGCTGAAGGATGGGCTGTATGGACCGGGTCATC
1205	arsR	AAGCTTTGCTCGAAGAAACTATGTTTTATTGGATGCCAACTTAATAACGAAAGAGACAAAGGGAACATGGAGTTATTATGATCTGTATGGACCGGGTCATC
1206	arsR	AAGCTTTGCTCGAAGAAACTATGTGGATGAGACGAAATCAGAACTGCTACGGAAATATGAACAAAAATTTAAGGCTCTTGCTGTGTATGGACCGGGTCATC
1207	arsR	AAGCTTTGCTCGAAGAAACTATGTCAAAGGGGAAAAACCTGTGTTTGTGATCTGACTGAGATTTTTGAGGTGACGCAATCTGTATGGACCGGGTCATC
1208	arsR	AAGCTTTGCTCGAAGAAACTATGTAAATGATGAGGAAGTAAATGGTTTATTATCAGAAGAGCTTTGTTGTATATTTAGAAAAATGTATGGACCGGGTCATC
1209	artP	AAGCTTTGCTCGAAGAAACTATGTCAAGGAAATGGAAGATAACGGAGAGCTTGAGAAATTGAAGAAAAAATGGTTCACTGGCGTGTATGGACCGGGTCATC
1210	artP	AAGCTTTGCTCGAAGAAACTATGGTTGCAGAAGGGTATTTCAAATCAAATGATGACCTGCAAGGCTTTGTGATTCCTGATGCTGTATGGACCGGGTCATC
1211	artP	AAGCTTTGCTCGAAGAAACTATGGGCTTTGATGTAGAGCTGGCAAAAGCTCTGGCAAAGAAGGCAGGCTATGAAATTGAATGTATGGACCGGGTCATC
1212	artP	AAGCTTTGCTCGAAGAAACTATGGCCGGTTCAGCAATTGCTTTCAGAAAGGACAGTGAACTGACAGACAAATTCAATAAAGCGTGTATGGACCGGGTCATC
1213	artP	AAGCTTTGCTCGAAGAAACTATGGAAAAAATTAATTATGGGTACTTCGGCGGATTACAAACCGTTTGAATATAAAGAAGGAGATGTATGGACCGGGTCATC
1214	artP	AAGCTTTGCTCGAAGAAACTATGCTCGTTCTGTCAGGAATGACACCAACGCCTGAGCGTAAAAAACAAGTTGATTTTTCCGTGTATGGACCGGGTCATC
1215	artP	AAGCTTTGCTCGAAGAAACTATGCAGAAGACCGCAACAGAATTTCTGATTTGGTGCAGGAAATCAAATCTGACCGCTTCTGTATGGACCGGGTCATC
1216	artP	AAGCTTTGCTCGAAGAAACTATGCACAGCGAACCATATGATTGTCAGCAAAAAAGACAGCGGCATTCAATCTTTGAAAGACCTTGTATGGACCGGGTCATC
1217	artP	AAGCTTTGCTCGAAGAAACTATGAAAAACAGTTGGCGTTCAGCTTGGCTCTATTCAGGAAGAGAAGGGGAAAGAGCTTTCTCCTGTATGGACCGGGTCATC
1218	artP	AAGCTTTGCTCGAAGAAACTATGAAAAAATGGCTCTTATTACTTGTGGCTGCTTGCATCACCTTTGCATTAACTGCGTGCGTGTATGGACCGGGTCATC
1219	artQ	AAGCTTTGCTCGAAGAAACTATGTTGGATTTTTCAGCAACGATCCCCCAAATTCCTTTTATATTAGAAGGCTTGGCAATTACATGTATGGACCGGGTCATC
1220	artQ	AAGCTTTGCTCGAAGAAACTATGTGTCCTGATTTTAACGTTTATCGGCAAGGCTGTAGAAAGGAAGCTGAAATCCAATGATGTATGGACCGGGTCATC
1221	artQ	AAGCTTTGCTCGAAGAAACTATGGTCTATTTTGGCCTTCCTCAGCTGCTCGGATTTCAAATTGACCAGTTTTGGGCTGTGTATGGACCGGGTCATC
1222	artQ	AAGCTTTGCTCGAAGAAACTATGGTCGCATTGTCTTTGAATTCCGCCGCTTATGTATCGGAAATTATCAGAGCCGGAATGTATGGACCGGGTCATC
1223	artQ	AAGCTTTGCTCGAAGAAACTATGGTATTGTGCTAAGCTTATGCAAGATCAGCACATTCCGCCCGTTTATCTGGATCGCTGATTGTATGGACCGGGTCATC
1224	artQ	AAGCTTTGCTCGAAGAAACTATGGATGAAGGATCTGCTGCTGCCGCAGGCCTTCAAAAATATATCACCTGCAATTGTGTGTATGGACCGGGTCATC
1225	artQ	AAGCTTTGCTCGAAGAAACTATGCGCCGCCACTTACAATTACCTTGAGCCGCTCATTATCGCGGGATTGATTTATTATGTGTATGGACCGGGTCATC
1226	artQ	AAGCTTTGCTCGAAGAAACTATGATTAATTACGTTAACAAAAGAATCGGCGATCGTCACCGTCATCGGGCTTGGTGATGTGTATGGACCGGGTCATC
1227	artR	AAGCTTTGCTCGAAGAAACTATGTTAAAAAACATTTCAACAACAATCGCTGAGGGTGAGGTTGTTGCCGTGATCGGTCTGTATGGACCGGGTCATC
1228	artR	AAGCTTTGCTCGAAGAAACTATGTGAGGACCTGCTCCGCAAAGTCGGTTTGTTTGAAAAGCGAAATGACTATCCAAACTGTATGGACCGGGTCATC
1229	artR	AAGCTTTGCTCGAAGAAACTATGGGCAAATCAACGTTCTTACGCTGTTTAAACCTGTTGGAAAAGCCTAACGGCGGAACCTGTATGGACCGGGTCATC
1230	artR	AAGCTTTGCTCGAAGAAACTATGGCTTCGCAAAAGAAGTGGCAGACCGTGTGCTGTTTATGGACCAAGGAATGATTGTTGTATGGACCGGGTCATC
1231	artR	AAGCTTTGCTCGAAGAAACTATGCCTTGATCCAGAGATGGTCAAAGAAGTGCTACAGGTGATGAAAGAGCTGGTCGAAACCTGTATGGACCGGGTCATC
1232	artR	AAGCTTTGCTCGAAGAAACTATGATTTTCATCTCTTTCCGCACAAAACGGTTCTCGAAAACATCATGTACGCGCCTGTTGTATGGACCGGGTCATC
1233	artR	AAGCTTTGCTCGAAGAAACTATGACGGCAATCCGAAGGAATTTTTTATGTCGCCAAAATCCAAAAGAGCGCAGGACTTTTTAGTGTATGGACCGGGTCATC
1234	artR	AAGCTTTGCTCGAAGAAACTATGACACAGAGATTACGAAGCCGAAAACCAACACATTAAAGGTCCGGGAAAACATCGGGTGTATGGACCGGGTCATC
1235	artR	AAGCTTTGCTCGAAGAAACTATGAAAAACAGCGTGTCGCGATTGCCAGGGCTCTTGCGATGAATCCGGACATCATGCTTGTATGGACCGGGTCATC
1236	asd	AAGCTTTGCTCGAAGAAACTATGGCGACAGGGGCTGTGGGACAACAAATGCTTAAAACACTTGAAGACAGAAACTTTGAAATGTGTATGGACCGGGTCATC
1237	asd	AAGCTTTGCTCGAAGAAACTATGGACACTTCAGGATGATCCAAGCCAGCAGCTTTATCCGATGCCTGCTGATGCTGTCTGTATGGACCGGGTCATC
1238	asd	AAGCTTTGCTCGAAGAAACTATGGAAACGAAAAAAATCATGCACATGCCTGACCTTCAAGTAGCGGCTACATGTGTGAGACTGTGTATGGACCGGGTCATC
1239	asd	AAGCTTTGCTCGAAGAAACTATGCTTCTCCTGAGAGCTTTGAAGGGGTAAATATTGCTTTGTTCAGCGCCGGCGGAAGTGTATGGACCGGGTCATC
1240	asd	AAGCTTTGCTCGAAGAAACTATGCGCATCCGCAAAGACTTGGACAGAGCAAACGGTTTTCATTTATGGGTTGTTTCTGATATGTATGGACCGGGTCATC
1241	asd	AAGCTTTGCTCGAAGAAACTATGCCAATCCAAACTGGGCACTCAGAGTCCGTCTACATCGAAATAGACCGTGATGACGTGTATGGACCGGGTCATC
1242	asd	AAGCTTTGCTCGAAGAAACTATGCAGGCAGTATCAGGAGCGGGTAATGAAGCTGTAAAAGAGCTTTACAGCCAAACACAGGCTGTATGGACCGGGTCATC
1243	asd	AAGCTTTGCTCGAAGAAACTATGATCTTCAAAACGCTCTGCGGGGACAAAAGTCACGTTTAAAGGCCAAGAGCTGACTTGTATGGACCGGGTCATC
1244	asd	AAGCTTTGCTCGAAGAAACTATGAGGCGCGGCATGGAACTCTGTTCAAATTGCAGAAAGCCTGAAAAAACTAAACCTCGTATATGTATGGACCGGGTCATC
1245	asd	AAGCTTTGCTCGAAGAAACTATGAGATAATACGAGTGCGTTCCGCATGGATGAAAATACACCGCTTGTTGTGCCAGAAGTTGTATGGACCGGGTCATC
1246	asd	AAGCTTTGCTCGAAGAAACTATGACACTATCAAATCGCCTTCAACGCGATTCCGCAAATCGATAAATTCCAAGATAACGGCTATGTATGGACCGGGTCATC
1247	asd	AAGCTTTGCTCGAAGAAACTATGAAATGGTTGCGGCACTTGAACCGATCCGCAAAGCATATGGCTTAAACAAGGTCATTGTATGGACCGGGTCATC
1248	aseA	AAGCTTTGCTCGAAGAAACTATGTTTTTCCTTTTATCATTGCCAGCGGATTTATTGCGGATACCACTTCGCTTCCTTTTGTGTATGGACCGGGTCATC
1249	aseA	AAGCTTTGCTCGAAGAAACTATGTTGGCCATTGCCGGTACAGATACACATGGGATGATGAGAGAAGCGCTTATTTATGCTGTATGGACCGGGTCATC
1250	aseA	AAGCTTTGCTCGAAGAAACTATGTTGATAATATCGGTTTCTTTGAATGGGCAGCGCTTCATATGGCTAAGGCTGCAAAAGGATGTATGGACCGGGTCATC
1251	aseA	AAGCTTTGCTCGAAGAAACTATGTCCTCACGATACCCACTTTATTGATCACACTTGTCGGCCTGTATATTTGGCTGCTGATGTATGGACCGGGTCATC
1252	aseA	AAGCTTTGCTCGAAGAAACTATGTATGGCAGCCGAAAAATTTATCTATAGGGTGGTCAGCCTGTGGAGGCGCAGTTTTAGCTGTATGGACCGGGTCATC
1253	aseA	AAGCTTTGCTCGAAGAAACTATGGGACAATTGGAATGGGCTTTATTGCGGCGATTCTTTCTTCCATTATGAATAACTTGCCGTGTATGGACCGGGTCATC
1254	aseA	AAGCTTTGCTCGAAGAAACTATGGCAATCATTTTCTTAATCGCTGCGCAAAAGAGTCCGGCCGTCCATACAAAGAAAGTGTATGGACCGGGTCATC
1255	aseA	AAGCTTTGCTCGAAGAAACTATGCTATCGTCGCCGCGTTATTTGCAAATGACGGTGCAGCTCTTATATTGACACCAATCTGTATGGACCGGGTCATC
1256	aseA	AAGCTTTGCTCGAAGAAACTATGCGGTTCAGATTTAGGGCCTAAAATAACACCGATTGGTTCCTTAGCGACATTATTATGGCTTGTATGGACCGGGTCATC
1257	aseA	AAGCTTTGCTCGAAGAAACTATGCATGTTCTTTCGCACAAAGGTATGAAGATTTCCTGGGGCACGTATTTTAAAACAGGAATGTATGGACCGGGTCATC
1258	aseA	AAGCTTTGCTCGAAGAAACTATGCAGGGATTGTTTGGAATGCGACCTTGGCTTTTGTGGCCATCATACTGATATCGTTAATTCTGTATGGACCGGGTCATC
1259	aseA	AAGCTTTGCTCGAAGAAACTATGCAGAATGGTTGTCCCGTACCTGTTTTCGCTGCTGGCGAGCATCATTGTACTTTACTGTATGGACCGGGTCATC
1260	aseA	AAGCTTTGCTCGAAGAAACTATGATGTACGTTGTTGTGTATGGTGTCCGAAATGCCGGATTAACGGATGTCCTTTCAGATGTTGTATGGACCGGGTCATC
1261	aseA	AAGCTTTGCTCGAAGAAACTATGAATTGGATATTTTGCAAGTGAATTTTTTTCTATCCCTGTATCAGTGGTAGCGGGCAGCATGTATGGACCGGGTCATC
1262	aseR	AAGCTTTGCTCGAAGAAACTATGTGTCCTGAGTTTGATACATTGCAATTGATCTTACATCAAATTGATCAAGAGGATGAATTGTGTATGGACCGGGTCATC
1263	aseR	AAGCTTTGCTCGAAGAAACTATGGACGATTGATGTTGCGGCGATGACTCGTTGTTTGAAAACACTTAGTGATCAAACTAGGCTGTATGGACCGGGTCATC
1264	aseR	AAGCTTTGCTCGAAGAAACTATGCGCAGGTTTTGTGAATGAGGACAGAAGAGGCCAATGGCGTTATTATTCAATAAATGGTTCTGTATGGACCGGGTCATC
1265	aseR	AAGCTTTGCTCGAAGAAACTATGCAAGAATATTGTGTCTGTCAATTGGTTGATATGTTCGAAATGAGCCAGCCCGCCATAAGCTGTATGGACCGGGTCATC
1266	asnB	AAGCTTTGCTCGAAGAAACTATGGTTCCTGTCGGTTCGTTCCTGTCTGGCGGGATTGATTCTTCCTTTATTGTGTCTGTTGTATGGACCGGGTCATC
1267	asnB	AAGCTTTGCTCGAAGAAACTATGGGCTGCACTCCGCTTCAGGATCGTTATATCGGTAACGCGAAAATCTTTGAAGAGTCTGTTGTATGGACCGGGTCATC
1268	asnB	AAGCTTTGCTCGAAGAAACTATGGCAGCTGTTGAAGCATTATAATCCGAACCTTTCATATCGCGATGTGACGAAGACTTTGTATGGACCGGGTCATC
1269	asnB	AAGCTTTGCTCGAAGAAACTATGGATGAGCTCTTCGGCGGATATAACATTTACCGTGAACCGCTTTCGCTTAAACCGTTTGTGTATGGACCGGGTCATC
1270	asnB	AAGCTTTGCTCGAAGAAACTATGGAATTGTGCCTGAGCACGTATTAAACCGCAAAAAGCTTGGTTTCCCTGTACCGATCCTGTATGGACCGGGTCATC
1271	asnB	AAGCTTTGCTCGAAGAAACTATGCTTCTTGAAGACCATTGTGCGGACAAGGCTGATAACAGCCGTAAAATTTGGACTGTGCTATGTATGGACCGGGTCATC
1272	asnB	AAGCTTTGCTCGAAGAAACTATGCTCGTACAGCGATATCAACAAAATGCAGTATGTCGATATCCACACTTGGATGCGCGTGTATGGACCGGGTCATC
1273	asnB	AAGCTTTGCTCGAAGAAACTATGCCATTCGGCATTAAACCGTTGTACTACACAACGATCAATGATCAGGTTTATTTTGCCTCATGTATGGACCGGGTCATC
1274	asnB	AAGCTTTGCTCGAAGAAACTATGCATTTTGTTAAAGGCGGATAAAATGACGATGGCGAATTCTTTGGAACTGCGTGTGCTGTATGGACCGGGTCATC
1275	asnB	AAGCTTTGCTCGAAGAAACTATGCAAAGGGGTACACATTCAACACGGATTCGGACACAGAGGTTCTTCTTGCGACTTACCTGTATGGACCGGGTCATC
1276	asnB	AAGCTTTGCTCGAAGAAACTATGATTCCTGATGAGCTGAAAACGAAGAACGGCACGACGAAGTATCTTCTTCGCAAAGCTGTATGGACCGGGTCATC
1277	asnB	AAGCTTTGCTCGAAGAAACTATGATAAAGAGGCATTGCAGCAGTACATGTCTTTCCAATTTGTTCCTGAACCAAGCACGCTTGTGTATGGACCGGGTCATC
1278	asnB	AAGCTTTGCTCGAAGAAACTATGACTGCGCGGTATGTTTGCCTTTCTGATTTGGAATAAAAACGATCATGTGCTTTATGGGGTGTATGGACCGGGTCATC
1279	asnB	AAGCTTTGCTCGAAGAAACTATGAAATGATCGTTCACCGCGGTCCTGACAGTGATGGATATTTCCATGATGAGCACGTTGTATGGACCGGGTCATC
1280	asnH	AAGCTTTGCTCGAAGAAACTATGTTTATTCAGTTTATTGTTTCGGAGGAAGACGTCGGAGCTTGGCTGCATATTCTCTGCGATGTATGGACCGGGTCATC
1281	asnH	AAGCTTTGCTCGAAGAAACTATGTTGGTCTTTACAGGATATTTTGCTCAGGCAAGGCTATCGTGAGAATCTCCATCCCGATGTGTATGGACCGGGTCATC
1282	asnH	AAGCTTTGCTCGAAGAAACTATGTTGGAAAGAAGCACTCTCAGACATTTGGCTAAGCGGGGAAGCAGCCAGTAATCATAAAGATGTATGGACCGGGTCATC
1283	asnH	AAGCTTTGCTCGAAGAAACTATGTCCAAAGTCGGCTTTGCATTTCGGCGATTGTCCATTCTTGACCTTGTAAATGGACTGTATGGACCGGGTCATC
1284	asnH	AAGCTTTGCTCGAAGAAACTATGTCAGCTGCAGTCGCACATTTTGCTGCAGAAAAACAGGATCTCCATACGTTTACAGTGTATGGACCGGGTCATC
1285	asnH	AAGCTTTGCTCGAAGAAACTATGGGCTCGCGGGTATTATAAATCTGGCTGCTCCCCGTTCTCAGGAATGTACCTTTCATTGTATGGACCGGGTCATC
1286	asnH	AAGCTTTGCTCGAAGAAACTATGGCTGCATACAAGCTATACCCACCGGCCAAAGGTTCCTTTTTTCTATGGTAAGGACGTGATGTATGGACCGGGTCATC
1287	asnH	AAGCTTTGCTCGAAGAAACTATGGATCTGCAAATGTATAATTGCTGGCATGAAGATCGGATCGCCGCGGCTAATCATATTGTATGGACCGGGTCATC
1288	asnH	AAGCTTTGCTCGAAGAAACTATGGAGAACTGCTGGCAGATTCAGTCCATAGATGTTTACAAAGCGACGTTGAAGTCGGGTTGTTGTATGGACCGGGTCATC
1289	asnH	AAGCTTTGCTCGAAGAAACTATGGAAAGGCATGGCAGATGCCATCAGCTATAGGGGACCGGATGATGAACAATATCATTGTATGGACCGGGTCATC
1290	asnH	AAGCTTTGCTCGAAGAAACTATGCTAAACCCTGGCGTCACTCTGTTAAGGCCGGAAAGCGATAGTGAGCATTGCATCTACTGTATGGACCGGGTCATC
1291	asnH	AAGCTTTGCTCGAAGAAACTATGCCAGCATAATACAGGTTGAACACATTCATGCCATCATGACATATTTGGAGGATGATCCTGTGTATGGACCGGGTCATC
1292	asnH	AAGCTTTGCTCGAAGAAACTATGACCATCGGCTTGTTGAATGGGTTTGCGGAATACCTGATGGACTCCGTAAAGACTTTGTATGGACCGGGTCATC
1293	asnH	AAGCTTTGCTCGAAGAAACTATGACAGCACGACACTTTCACCAGCCGAGAACCCAAGTTGGGAAGGATTTATTGAATCTGTATGGACCGGGTCATC
1294	asnH	AAGCTTTGCTCGAAGAAACTATGAAAGAGCAATGATTCCAGCCAAGCAGATCCTTGGCAATCGTATGTCCTGACAAAATACCTGTATGGACCGGGTCATC
1295	asnO	AAGCTTTGCTCGAAGAAACTATGTCGATTGATTACGAAGAGAACGATAAATATTTTCAAGCAAGCGCTTTTCAGCCGAATGATGTATGGACCGGGTCATC
1296	asnO	AAGCTTTGCTCGAAGAAACTATGTCAGAAGCCAAAAGGACTCCGTGCTCCATACCTTACTGGACAGAAAACAATTAGATCAGCTGTATGGACCGGGTCATC
1297	asnO	AAGCTTTGCTCGAAGAAACTATGGCGGACGCCAGCCGATGGCGTGTACCTATAAAGGCGATACGTACACCATTATTTACTGTATGGACCGGGTCATC
1298	asnO	AAGCTTTGCTCGAAGAAACTATGGATGTGCCTGTTTGCACATTCCTATCAGGCGGTCTGGACTCAAGCGCGATTACAGTGTATGGACCGGGTCATC
1299	asnO	AAGCTTTGCTCGAAGAAACTATGGAGATTTTCGGCGGGTACCCGTGGTTCCATACGGCAGATGTTGAGTCTGGCTTTCTGTATGGACCGGGTCATC
1300	asnO	AAGCTTTGCTCGAAGAAACTATGGAATTACGGGTTGGGTCGATTTTAAAAAGCAGCTCGTCCAGGAAAAACAAACGATGGATGTATGGACCGGGTCATC
1301	asnO	AAGCTTTGCTCGAAGAAACTATGGAAACGCCATTATTAGACGGAGAAACGGGTGTGGATAAAGCAAGAAGACAGCTGTTCTGTATGGACCGGGTCATC
1302	asnO	AAGCTTTGCTCGAAGAAACTATGATCAATTCGAGCGTACGTCAGATACCGAGGTGCTTCTGCACAGCTACATCGAGTGTGTATGGACCGGGTCATC
1303	asnO	AAGCTTTGCTCGAAGAAACTATGACTTTCTGAAATTTTCGGTCTTGGACCGTCCAGAACCCCGGGCACTGGCATATTTAAAGTGTATGGACCGGGTCATC
1304	asnO	AAGCTTTGCTCGAAGAAACTATGACCGGCTTGTGGAATATGTTTGGAATATTCCGTGGGAAATGAAAATGCATGATAATCGGTGTATGGACCGGGTCATC
1305	asnO	AAGCTTTGCTCGAAGAAACTATGAAGCGTAATCTGTTGTTTGCCGCGAGAGACCGTCTCGGTGTAAAGCCGTTTTTTTACTGTATGGACCGGGTCATC
1306	asnO	AAGCTTTGCTCGAAGAAACTATGAACGTTTGGGGGGAGCACCATGTTTTATTCGGACATAAAAGACTTGCGGTTGTTGTGTATGGACCGGGTCATC
1307	asnO	AAGCTTTGCTCGAAGAAACTATGAAAGGCATTTTGCGCAAAGCGCTTGAGGGCATTTTGCCTGATGACATTTTGTATCTGTATGGACCGGGTCATC
1308	asnO	AAGCTTTGCTCGAAGAAACTATGAAAAAGACCTCGTTGATCATTTGGAGGAAGCTGTACTGGTCAAAGACTTGCCGGGAATGTATGGACCGGGTCATC
1309	asnS	AAGCTTTGCTCGAAGAAACTATGGGGTCTGAACGGATTCACGATATGGAACTTTTGGAATCGCGTCTTAAAGAACATGGACTGTGTATGGACCGGGTCATC
1310	asnS	AAGCTTTGCTCGAAGAAACTATGGGGAAAATTGCGTTTTTACAGCTTCGGGACGGTACCGGTTTTATTCAGGGTGTCGTAGTATGTATGGACCGGGTCATC
1311	asnS	AAGCTTTGCTCGAAGAAACTATGGGAAGCGCACCTGAAGGAACAACAGAACTCTTTGCGACAAAGTACTTTGATGAAGATGCTGTATGGACCGGGTCATC
1312	asnS	AAGCTTTGCTCGAAGAAACTATGGCGTCACTTAATCGAATTCTGGATGATCGAACCGGAAATGGCGTTTGTAGAATTTGAAGATGTATGGACCGGGTCATC
1313	asnS	AAGCTTTGCTCGAAGAAACTATGGCGCGACTTACGAATTCTTTAATAACGAAGGCTTCGTAAAAGTGGATCCGCCGATTTTGATGTATGGACCGGGTCATC
1314	asnS	AAGCTTTGCTCGAAGAAACTATGGAGGACGAGCGTTCTCCGCTTGGATATGAACTTGCTGTGACAGATATTGAAGTCATTCATGTATGGACCGGGTCATC
1315	asnS	AAGCTTTGCTCGAAGAAACTATGCTGAACTTAGAAAATATGGATCAGTTCCTCATTCCGGCTTCGGCCTTGGATTAGAGCGGTGTATGGACCGGGTCATC
1316	asnS	AAGCTTTGCTCGAAGAAACTATGCCTCACGTTCGTGAAACGATTCCGTTCCCAAGACTGTTAAACCGTCTGTATCCGTAATGTATGGACCGGGTCATC
1317	asnS	AAGCTTTGCTCGAAGAAACTATGCATCACTCGCTATCCGACGTCCTTAAAACCGTTCTATATGCAGCCGGCTTCTGACTGTATGGACCGGGTCATC
1318	asnS	AAGCTTTGCTCGAAGAAACTATGCAAGTGTACAAGCACGTAGGTGAGGAAGTAACGATCGGAGCTTGGGTCGCTAATAAGCGTGTATGGACCGGGTCATC
1319	asnS	AAGCTTTGCTCGAAGAAACTATGATTTATGGCTGCGTTCAAAGCGCCAGCATGCGATCATGAAAATCCGTAATGAAATTGTATGGACCGGGTCATC
1320	asnS	AAGCTTTGCTCGAAGAAACTATGAGCTCTACATGGAAGCTGCGGCAATGGCTTTAGGAAAAGTATTCTCTTTCGGACCGACATTGTATGGACCGGGTCATC
1321	asnS	AAGCTTTGCTCGAAGAAACTATGAGCGACCGATTATCCAATTACACCAAAAGAACACGGAACGGAATTTTTGATGGATCACATGTATGGACCGGGTCATC
1322	asnS	AAGCTTTGCTCGAAGAAACTATGAAAAAGGCTTTGACGATATCGAGTGGGGAGATGATTTCGGAGCGCCTCATGAAACTGTATGGACCGGGTCATC
1323	aspB	AAGCTTTGCTCGAAGAAACTATGTTGAAACTGGCAAAAAGAGTATCCGCATTAACACCATCAACCACACTGGCAATCACATGTATGGACCGGGTCATC
1324	aspB	AAGCTTTGCTCGAAGAAACTATGTGGCTCTCCTGAGAATGTCCGTCTTTCTTATGCAACATCGTTAGATCTTCTTGAAGAAGCTGTATGGACCGGGTCATC
1325	aspB	AAGCTTTGCTCGAAGAAACTATGTGAAGTTATTATTCCAACGCCTTACTGGGTAAGCTACCCGGAGCAGGTGAAACTCGCTGTGTATGGACCGGGTCATC
1326	aspB	AAGCTTTGCTCGAAGAAACTATGTCCATTGCACAGCTGTCAGACAGACTGAAAGAGCAAACGGTCATTATAAACGGCGTATCTGTATGGACCGGGTCATC
1327	aspB	AAGCTTTGCTCGAAGAAACTATGTAGATGAATTTGTTAAAGCGCTTCTCGAGGAGGAAAAAGTTGCGATTGTTCCAGGATCCGTGTATGGACCGGGTCATC
1328	aspB	AAGCTTTGCTCGAAGAAACTATGTAACTCTCCAAGCAACCCGACTGGTGTCATGTATACGGAAGAAGAACTATCTGCGCTCGTGTATGGACCGGGTCATC
1329	aspB	AAGCTTTGCTCGAAGAAACTATGGCTGGAGAATCGGTTATGCGGCAGGCTCTGAAGACATTATTAAAGCGATGACGAATGTATGGACCGGGTCATC
1330	aspB	AAGCTTTGCTCGAAGAAACTATGGCGATTGCTGCTTATAACGGGCCTTCTGAGCCATTGGAAGAAATGAGAGAAGCATTTTGTATGGACCGGGTCATC
1331	aspB	AAGCTTTGCTCGAAGAAACTATGGCCTTGAACATGATATCTTGATTGTGTCAGATGAAATTTATGAAAAACTTACATACGGCGTGTATGGACCGGGTCATC
1332	aspB	AAGCTTTGCTCGAAGAAACTATGGAAGGGCTTGAGGAAAATCACTTCAAAATTTCGCCTGAGCAGCTGAAAAATGCAATTACGTGTATGGACCGGGTCATC
1333	aspB	AAGCTTTGCTCGAAGAAACTATGGAACGAGGGCCATACGAAATACACGCCTTCCGGTGGTTTGGCTGAACTGAAAAACTGTATGGACCGGGTCATC
1334	aspB	AAGCTTTGCTCGAAGAAACTATGCCGTCTCAAATTATTGTCTGCACTGGTGCCAAACATGCTCTGTATACCCTTTTCCAAGTGTGTATGGACCGGGTCATC
1335	aspB	AAGCTTTGCTCGAAGAAACTATGCATCGGCTTAGGAGCAGGCGAGCCTGACTTCAATACACCGCAGCATATTATTGATTGTATGGACCGGGTCATC
1336	aspB	AAGCTTTGCTCGAAGAAACTATGAGCTCATAGAAATCCCAGGGTTCAGCTGCGTGAAGCCGGAAGGTGCTTTTTACTTTGTATGGACCGGGTCATC
1337	aspS	AAGCTTTGCTCGAAGAAACTATGTTGCGGTGATATAACTGAAAAAGCAATTGGCGAATCTGTAACGCTGAAAGGCTGGGTGTATGGACCGGGTCATC
1338	aspS	AAGCTTTGCTCGAAGAAACTATGTTATTGACTTGCGTGACCGTACGGGCATTGTTCAAGTCGTTTTTAACCCTGATGTGTCTGTATGGACCGGGTCATC
1339	aspS	AAGCTTTGCTCGAAGAAACTATGTGTTCAATTTCTTATGGGTCATCGACTGGCCGCTATTAGAGCATGATCCGGAAGAAGGTGTATGGACCGGGTCATC
1340	aspS	AAGCTTTGCTCGAAGAAACTATGGTTTTTACGCAGCGCACCATCCGTTCACAATGCCTGTCCGAGAAGACCTTGAGCTTGTATGGACCGGGTCATC
1341	aspS	AAGCTTTGCTCGAAGAAACTATGGGAAGACATTATGTCATTGGCTGAGGAGATGATGGCAAAGGTTATGCGTGAAACAAAAGGTGTATGGACCGGGTCATC
1342	aspS	AAGCTTTGCTCGAAGAAACTATGGCTGCGCCATAACGTGACGAAAGCTGTTCGCAGCTTTTTAGATGAAAATGGGTTTTGTATGGACCGGGTCATC
1343	aspS	AAGCTTTGCTCGAAGAAACTATGGAAATGAATACGTGCTTGATATTCAAGGAAAAGTGGTGGCGCGTGAAGAGGGAACATGTATGGACCGGGTCATC
1344	aspS	AAGCTTTGCTCGAAGAAACTATGGAAAACAGGCGCGATCGAAATACATGCTGATGGAGTGAACGTATTAAATGCTGCAAAGACTGTATGGACCGGGTCATC
1345	aspS	AAGCTTTGCTCGAAGAAACTATGCTTCTGATGGTATCAGGCATTGAACGATATTATCAAATTGCCCGCTGTTTCCGCGTGTATGGACCGGGTCATC
1346	aspS	AAGCTTTGCTCGAAGAAACTATGCGTCTCGTTATGCTTCTCGCTGGACGTACGAACCTGAGAGATACGATTGCATTCCTGTATGGACCGGGTCATC
1347	aspS	AAGCTTTGCTCGAAGAAACTATGCCTCGAATGACGTATGACGAAGCAATGAACAAGTACGGGTCTGATAAACCGGATACGCTGTATGGACCGGGTCATC
1348	aspS	AAGCTTTGCTCGAAGAAACTATGCAGAGGACGTTCGTTTAAAACACCGTTACTTAGATTTGCGCAGACCGGCTATGTTCCAGATGTATGGACCGGGTCATC
1349	aspS	AAGCTTTGCTCGAAGAAACTATGAGGATACGGAATTTAAAGTGTTCTCATCAGCTGTAGCAAACGGCGGCGTGGTCAAAGTGTATGGACCGGGTCATC
1350	aspS	AAGCTTTGCTCGAAGAAACTATGACAGCGCCTGAAGACATGAAAGCGCAAGCTTATGACCTCGTCTTAAACGGCTATGTGTATGGACCGGGTCATC
1351	atpA	AAGCTTTGCTCGAAGAAACTATGTTACAGCTCTGCCGTTCGTAGAAACACAAGCCGGAGATATCTCTGCTTATATTCCGACGATGTATGGACCGGGTCATC
1352	atpA	AAGCTTTGCTCGAAGAAACTATGTGCGCTGACAAAAGGATATCTCGATGATATTCCTGTGGCGGATATCAGACGTTTTGAATGTATGGACCGGGTCATC
1353	atpA	AAGCTTTGCTCGAAGAAACTATGGTTATGGACCGTAAATCCGTTCATGAACCGCTTCAAACCGGTATCAAAGCGATCGTGTATGGACCGGGTCATC
1354	atpA	AAGCTTTGCTCGAAGAAACTATGGGAATCAAACGTAGGTATCGTCATCTTAGGACCTTTCAGTGAGATCCGTGAGGGAGACGATGTATGGACCGGGTCATC
1355	atpA	AAGCTTTGCTCGAAGAAACTATGGCACCGCTTCTGTACCTGGCACCGTATGCTGGGGTTACAATGGCAGAAGAATTTATTGTATGGACCGGGTCATC
1356	atpA	AAGCTTTGCTCGAAGAAACTATGGAGGTTCCTGTTGGTGAAGAGTTAATCGGCCGTATTGTAAACCCGCTAGGCCAGCTGTATGGACCGGGTCATC
1357	atpA	AAGCTTTGCTCGAAGAAACTATGGAGCTGATCATCGGTGACCGTCAAACAGGTAAAACATCTGTTGCGATCGATGCGATTGTATGGACCGGGTCATC
1358	atpA	AAGCTTTGCTCGAAGAAACTATGCAACTGTATGGCCGGTGAACTTGTCGAATTTTCAAACGGTGTTTTGGGTATGGCTTGTATGGACCGGGTCATC
1359	atpA	AAGCTTTGCTCGAAGAAACTATGATTGAAGTTCAAGACGTAGGTACAGTCATCCAAGTCGGTGACGGTATTGCACGTGTGCTGTATGGACCGGGTCATC
1360	atpA	AAGCTTTGCTCGAAGAAACTATGAGGCCGTGAAGCGTTCCCTGGGGATGTATTCTATCTTCATTCCCGTCTGCTTGAGTGTATGGACCGGGTCATC
1361	atpA	AAGCTTTGCTCGAAGAAACTATGAGATCTTCCTGCAATCTGATTTGTTCTTCTCAGGCGTACGTCCAGCGATCAATGCTGTATGGACCGGGTCATC
1362	atpA	AAGCTTTGCTCGAAGAAACTATGAGACCAAGACATGATCTGTGTATATGTTGCGATCGGCCAAAAAGAATCAACAGTCCGCTGTATGGACCGGGTCATC
1363	atpA	AAGCTTTGCTCGAAGAAACTATGAAAGTATCAGGTACTTTGCGTCTTGACCTTGCGTCATACCGTGAGCTGGAAGCATTCGTGTATGGACCGGGTCATC
1364	atpA	AAGCTTTGCTCGAAGAAACTATGAAACATTGCGTAAACACGGCGCGCTTGATTATACAATTGTTGTAACGGCGTCTGCTGTATGGACCGGGTCATC
1365	atpB	AAGCTTTGCTCGAAGAAACTATGTTGGTGCTATCCAGGCATTTATCTTTACAATGCTGACGATGGTGTACATGTCTCATGTATGGACCGGGTCATC
1366	atpB	AAGCTTTGCTCGAAGAAACTATGTTGGCAGTACAATGGATTTAAAAACAGGGGCTAACTTCTTGGCACTTGGTGTCACATTGCTGTATGGACCGGGTCATC
1367	atpB	AAGCTTTGCTCGAAGAAACTATGTTCTAGGTCTTACTTTTAATCTGACAAACATTCTGATGATTACTGTGGCGAGTGTGATTGTGTATGGACCGGGTCATC
1368	atpB	AAGCTTTGCTCGAAGAAACTATGGCTCAAGGAATATTCCAAAGACTATTTAAGACCTGTTCCATTCATGCTCCCGATGAAAATGTATGGACCGGGTCATC
1369	atpB	AAGCTTTGCTCGAAGAAACTATGGCCGATCCTGCCATTACATTAACGCTAGCCGTGATGGTTGTTGCTTTAACCCACTATGTATGGACCGGGTCATC
1370	atpB	AAGCTTTGCTCGAAGAAACTATGATTGCTATATTGACGACAAGAACGCTTTCGATCCGTCCCGGAAAAGCCCAGAACTTTATGTATGGACCGGGTCATC
1371	atpB	AAGCTTTGCTCGAAGAAACTATGATTAGCAACAAGCCATTATTCGCAAAGCGTGGCTCTCGGTCTTGTCGGTACAATCTGTATGGACCGGGTCATC
1372	atpB	AAGCTTTGCTCGAAGAAACTATGATATGCTGGGGCTGCCGTTCTCTATTACAATCGGACATGAGCTCTGGTGGAAGTCTGTATGGACCGGGTCATC
1373	atpB	AAGCTTTGCTCGAAGAAACTATGAAGAGTTTGCGAATACGCTGACTCTAGGTTTGCGGCTGTATGGTAACATCTTCGCCGTGTATGGACCGGGTCATC
1374	atpC	AAGCTTTGCTCGAAGAAACTATGGTTTTGTAGAAGTCCGTCCTGATCATGTCACCATCCTTGCCCAGGCTGCCGAGACTGTATGGACCGGGTCATC
1375	atpC	AAGCTTTGCTCGAAGAAACTATGGAAGACCGTTAAAGTCAATATCGTTACTCCCGACGGCCCAGTATACGATGCGGATATCGATGTATGGACCGGGTCATC
1376	atpC	AAGCTTTGCTCGAAGAAACTATGAGGCCATATTCCAACCGTGGCTCCTCTTAAAATCGGCGCTGTCCGTCTGAAAAAAGTGTATGGACCGGGTCATC
1377	atpC	AAGCTTTGCTCGAAGAAACTATGAGGAGCGTTTGAATTCTCAATCAGATGATACTGACATTCGTCGGGCTGAGCTTGCTGTATGGACCGGGTCATC
1378	atpD	AAGCTTTGCTCGAAGAAACTATGTAGGAGAGCGTACTCGTGAAGGGAACGACCTTTTCTACGAAATGAGTGACTCTGGCGTGTATGGACCGGGTCATC
1379	atpD	AAGCTTTGCTCGAAGAAACTATGTAGGACCGGTCGTCGACGTGCGTTTTGAAGACGGTCACTTGCCTGAAATTTATAATTGTATGGACCGGGTCATC
1380	atpD	AAGCTTTGCTCGAAGAAACTATGGTTCAGAGGTTTCAGCCCTTCTTGGCCGTATGCCTTCAGCGGTTGGTTATCAGCCTGTATGGACCGGGTCATC
1381	atpD	AAGCTTTGCTCGAAGAAACTATGGGCTGAACAGTTCACTGGACAAAAAGGTTCTTACGTGCCTGTAAAAGAGACGGTACAAGGTGTATGGACCGGGTCATC
1382	atpD	AAGCTTTGCTCGAAGAAACTATGGCCGGTAAATATGACCATCTTCCAGAAGATGCATTCCGTCTTGTAGGCCGTATCGAATGTATGGACCGGGTCATC
1383	atpD	AAGCTTTGCTCGAAGAAACTATGGAACGTTGGATCAGTTACATCTATCCAGGCGATCTACGTGCCTGCCGATGACTACATGTATGGACCGGGTCATC
1384	atpD	AAGCTTTGCTCGAAGAAACTATGGAAATTGTTGGAGAAGAGCACTATGCGGTTGCGCGTGAAGTACAGTCAACGCTTCTGTATGGACCGGGTCATC
1385	atpD	AAGCTTTGCTCGAAGAAACTATGCTTGCTCCTTACATTAAGGGCGGTAAAATCGGATTGTTCGGTGGTGCCGGTGTAGTGTATGGACCGGGTCATC
1386	atpD	AAGCTTTGCTCGAAGAAACTATGATTAACTGAAATGGGTATTTACCCTGCGGTTGATCCGTTGGCATCTACATCACGCGTGTATGGACCGGGTCATC
1387	atpD	AAGCTTTGCTCGAAGAAACTATGATCTACAGATGGTGTTCAGCGCGGTATGGAAGCTGTAGATACAGGAGCGCCAATCTCTGTATGGACCGGGTCATC
1388	atpD	AAGCTTTGCTCGAAGAAACTATGACGTATGCGTGTTGCTTTGACAGGCCTTACAATGGCTGAGCACTTCCGTGATGTACTGTATGGACCGGGTCATC
1389	atpD	AAGCTTTGCTCGAAGAAACTATGACCGTATTAATCCAGGAATTAATCAACAACATCGCGCAAGAGCACGGCGGTATCTCTGTATGTATGGACCGGGTCATC
1390	atpD	AAGCTTTGCTCGAAGAAACTATGACAAACTTGTCGTTCACCGCGCACGTCGTATCCAGTTCTTCCTTTCTCAGAACTTCTGTATGGACCGGGTCATC
1391	atpD	AAGCTTTGCTCGAAGAAACTATGAAAAGGATCCGATTCACAGACAGGCGCCTTCATTCGATCAGCTTTCAACAGAAGTTTGTATGGACCGGGTCATC
1392	atpE	AAGCTTTGCTCGAAGAAACTATGTCAGCCGGAAGCAGGTAAAGAACTGAGAACTCTTATGTTCATGGGTATCGCATTAGTTGATGTATGGACCGGGTCATC
1393	atpE	AAGCTTTGCTCGAAGAAACTATGCACTTGGTGCAGGTATTGGTAACGGTTTGATTGTTTCACGTACGGTAGAGGGGATTGCTGTATGGACCGGGTCATC
1394	atpF	AAGCTTTGCTCGAAGAAACTATGTGTCTCAATTACCACTTGAACTAGGATTGTCGTTTAACGGCGGAGATATCCTGTTCCAACTGTATGGACCGGGTCATC
1395	atpF	AAGCTTTGCTCGAAGAAACTATGTGCAGAATCTGAACGTCTGAAAGAAGCAGCAAGAACTGAAATCGTGAAGGAAAAGGAACATGTATGGACCGGGTCATC
1396	atpF	AAGCTTTGCTCGAAGAAACTATGTGAACAAGCGCAAGAGAAATTGATCCAGGACTATCTTAAAGAGGTAGGAGAAAGCCGATGTGTATGGACCGGGTCATC
1397	atpF	AAGCTTTGCTCGAAGAAACTATGGTTTCTGCTCTCCGTGAGCAAGTAGCGTCTCTTTCTGTCATGATTGCGTCGAAAGTGTATGGACCGGGTCATC
1398	atpF	AAGCTTTGCTCGAAGAAACTATGGAAGCAAGACAGGAATCCCAAACTCTTATCGAAAACGCAAAGAAACTGGGAGAGAAGCAATGTATGGACCGGGTCATC
1399	atpF	AAGCTTTGCTCGAAGAAACTATGGAAATTACGTCTGCTGAAGAAAAAAATAAAGAAGCGCAGCAGCTGATTGAAGAGCAGCGCTGTATGGACCGGGTCATC
1400	atpF	AAGCTTTGCTCGAAGAAACTATGGAAATACGCTTTAGGGCCGCTATTAAACATAATGAAACAGCGTGAAGACCACATCGCTGGTGTATGGACCGGGTCATC
1401	atpG	AAGCTTTGCTCGAAGAAACTATGTCACGTCAACGAAAAAAACAAGTCAGATTACAAAAGCCATGCAGATGGTATCTGCGGCTTGTATGGACCGGGTCATC
1402	atpG	AAGCTTTGCTCGAAGAAACTATGTAAGAAACGGGAGATTCCGATCATTTCCGAGTTAACAGGACTTGGAGATGAAGTAACGTTTGTATGGACCGGGTCATC
1403	atpG	AAGCTTTGCTCGAAGAAACTATGGAGTGCTTATCAGGCCATGCAAGAACGTCATCAGTCTAAGGATGAGTATGCGGTGATTGTGTATGGACCGGGTCATC
1404	atpG	AAGCTTTGCTCGAAGAAACTATGGACAGACAACGCGAAGGAACTTATCGATTCACTTTCGCTTTCTTACAACCGCGCTCTGTATGGACCGGGTCATC
1405	atpG	AAGCTTTGCTCGAAGAAACTATGCGGTGCGTTTGATGAATTGCACCTTGTTTATAACCATTTTGTCAGCGCCATTACTCAATGTATGGACCGGGTCATC
1406	atpG	AAGCTTTGCTCGAAGAAACTATGCGGCGTCTTATGAATTTGAACCATCTGAAGAGGAGGTTCTGGAGGTTTTGCTTCCTCAATTGTATGGACCGGGTCATC
1407	atpG	AAGCTTTGCTCGAAGAAACTATGCAGCCATCACACAAGAAATTACGGAAATTGTCGGCGGAGCAGCCGCTTTAGAATAGTGTATGGACCGGGTCATC
1408	atpG	AAGCTTTGCTCGAAGAAACTATGATAAAATCCAAGAGGTTGTGTCAAACGTCGGAAGAGTTTCCGGCAACGTGAAGCACTGTATGGACCGGGTCATC
1409	atpG	AAGCTTTGCTCGAAGAAACTATGAAGCTTAATCTTCGGTGCGCTTCTTGACAGTAAAGCAAGTGAGCACGCTGCAAGAATGTATGGACCGGGTCATC
1410	atpG	AAGCTTTGCTCGAAGAAACTATGAAAAACGGCATACCTTGTCATTACGTCTGACCGCGGTCTTGCCGGCGCTTTTAACTGTATGGACCGGGTCATC
1411	atpH	AAGCTTTGCTCGAAGAAACTATGTGAAACCGCTGACGGATGCAGAAATGTTACCATTATCACAAGTGTTTGCAAAAAAAGCCTGTATGGACCGGGTCATC
1412	atpH	AAGCTTTGCTCGAAGAAACTATGGTATTAAAGTCCGCATTGGAAACCGGATTTATGACGGCAGCGTAAGCGGGAAGCTTGTATGGACCGGGTCATC
1413	atpH	AAGCTTTGCTCGAAGAAACTATGGAGCTCACAGATGAGTTTATCAAACTCGCAAATGTGGCCCGTCAAACAGAAGACGTGTATGGACCGGGTCATC
1414	atpH	AAGCTTTGCTCGAAGAAACTATGATGAAAAAGCGCTTAATGATGTGTTGAACCATCCGAAGGTGCCGGCTGCGAAGAAAAAAGTGTATGGACCGGGTCATC
1415	atpH	AAGCTTTGCTCGAAGAAACTATGAGCTGATTCAAAATGCATTTGGCTCTTTGTCACAGTCCGTACTCAATACGATTTTTCTTTTGTATGGACCGGGTCATC
1416	atpH	AAGCTTTGCTCGAAGAAACTATGAGCCAATGAGTCCGCTCAGCTGAATCAAGTAGAAGAAGAGCTAATTGTTGTAAAACAAGTTGTATGGACCGGGTCATC
1417	atpI	AAGCTTTGCTCGAAGAAACTATGTGGACGATCCCAAGCTTACATTTAGCAGACAACGCAAATATTTATTGTTCATTTTGGCATGTATGGACCGGGTCATC
1418	atpI	AAGCTTTGCTCGAAGAAACTATGTGCTGTGGCTGTTGCCTATAAAAATCCCGAATACTTTCATATGGCAAGTACAGTTATTGGTGTATGGACCGGGTCATC
1419	atpI	AAGCTTTGCTCGAAGAAACTATGGTAGAGAAAGGAAAGTCCATACGATCTCTCGGGAGCGCAGCGCGGTGGTGCAATGTGTATGGACCGGGTCATC
1420	atpI	AAGCTTTGCTCGAAGAAACTATGCTGGGTTATGGTTTAACAGCGTATAAAACCGTTTTTTTAGGCCTTATTCTGGGAACTGTTTGTATGGACCGGGTCATC
1421	atpI	AAGCTTTGCTCGAAGAAACTATGCATTATGATAGATTCCTTTATCCAGCTTAAACGTTCATCAATGGAAGAGAGGTGATGTATGGACCGGGTCATC
1422	azlB	AAGCTTTGCTCGAAGAAACTATGTTGGAATCGAAGTCACAGCACTAGCTCTCATCAACTTATCACCCTTAAATAGGGAGACAATGTATGGACCGGGTCATC
1423	azlB	AAGCTTTGCTCGAAGAAACTATGTTACAGGAAGCCATGACTATATGCTTAAGATTGTGGCGAAGGACATGGAGAGTTATCGGATGTATGGACCGGGTCATC
1424	azlB	AAGCTTTGCTCGAAGAAACTATGTGGGTATTATGCTTGACGAAACTGATAAGGCCATCTTAAGAGATTTGCAGGAAGATGCTTTGTATGGACCGGGTCATC
1425	azlB	AAGCTTTGCTCGAAGAAACTATGTCATTGATTCATTAATGCAGAACCCTGCTATTAGTGGAGTTGACACAAGCATAGTCATGATGTATGGACCGGGTCATC
1426	azlB	AAGCTTTGCTCGAAGAAACTATGGAAAATTGGGCTTTCACCATCAGCTTGCCTTGCAAGAACAAAGAACCTAGTAGAAGCAGGTGTATGGACCGGGTCATC
1427	azlC	AAGCTTTGCTCGAAGAAACTATGTTTTTTGTGACACTGCTTAATCATTTATATTGGGTCGCGGGGGCAGCGATAGGAGGTGTATGGACCGGGTCATC
1428	azlC	AAGCTTTGCTCGAAGAAACTATGTTTGGGTCGTACGTGAAGTTTAATACCGAAGGGCTTGATTTTGTGATGACTGCTCTGTTTTGTATGGACCGGGTCATC
1429	azlC	AAGCTTTGCTCGAAGAAACTATGTTAATGGTCAATGCCCGGCATTTGTTTTATGGAATTTCCATGTTGGATAAGTACAGGGGGTGTATGGACCGGGTCATC
1430	azlC	AAGCTTTGCTCGAAGAAACTATGTGGGGATAGCTTATGGGATCTTTATGCATTCTTTGGGATTTAGCGCAATCTATCCAATCATGTATGGACCGGGTCATC
1431	azlC	AAGCTTTGCTCGAAGAAACTATGTGCTATGCTCGCCATTTTAGGGGTACTGACTGTTCTGAGAAAACCATTGGAGAAAGCTGATGTATGGACCGGGTCATC
1432	azlC	AAGCTTTGCTCGAAGAAACTATGTGATTTTCGGAATGTGCGATGAATCATTTTCTATCAATTATACCGCTAATGTTCCGGCGATGTATGGACCGGGTCATC
1433	azlC	AAGCTTTGCTCGAAGAAACTATGTGAATAAGAGAAGTCAAATATGGGCTGCATTTCGTTCTGCATTCCCATATACCATTCCGATGTATGGACCGGGTCATC
1434	azlC	AAGCTTTGCTCGAAGAAACTATGCATTACAGTGCTCTCACGGGACTTGGACTTTCAGTAGCCAGTCTTATCCTTTTTGGCGGTGTATGGACCGGGTCATC
1435	azlC	AAGCTTTGCTCGAAGAAACTATGATGATATTTGCGGGCTCAATGGAGTTTGTTGCAGCGAATTTTTTACTTGGTGCGTTCTGTATGGACCGGGTCATC
1436	azlD	AAGCTTTGCTCGAAGAAACTATGTGATTTTCCCGTCTGGCAAACCGACACCGAAATATGTACAGTATCTTGGTAAAGTGCTGCTGTATGGACCGGGTCATC
1437	azlD	AAGCTTTGCTCGAAGAAACTATGCTACTTTCTGGAAGTCATGGCATTCCTGAATTGGTTGGAGCAGCTGCTGTTGTACTGCTTGTATGGACCGGGTCATC
1438	azlD	AAGCTTTGCTCGAAGAAACTATGCACTTGTGGAAGAAAAATATGCTTCTTTCCATAGCGGGGGGAACCGTTGTTTATATGGTTTGTATGGACCGGGTCATC
1439	azlD	AAGCTTTGCTCGAAGAAACTATGATGACTATGACGCAGCAAATGATCACCATCGCAATGGTCGTGCTTGGAACAATGCTTGTATGGACCGGGTCATC
1440	azoR1	AAGCTTTGCTCGAAGAAACTATGTTGCTGACAAATATCTGAACCAGTTTGTAAAAGCTGACAAAGTTGTTTTCGCATTCCCGCTGTATGGACCGGGTCATC
1441	azoR1	AAGCTTTGCTCGAAGAAACTATGTCTTGGTTTCTGGGGTGTTCAAGACTTGCACACAGTTGTCATCGAAGGACATAACGTGTATGGACCGGGTCATC
1442	azoR1	AAGCTTTGCTCGAAGAAACTATGTCAAGCGACCGTACAGCTGAAGAAGGCGTTTCAACTAAACTTTACGAAGCTTTCTTAGCTTGTATGGACCGGGTCATC
1443	azoR1	AAGCTTTGCTCGAAGAAACTATGCTGATCAAGCGCAAGAAATCGTTGAAAAAGGTTTACAAGAAGCAAAAGATCTTGCTGCAATGTATGGACCGGGTCATC
1444	azoR1	AAGCTTTGCTCGAAGAAACTATGCCTTGGCAGAGATATGATTAACGGAACATTTAAAGCAGGTCAAGGAATGGAAATGACAGATGTATGGACCGGGTCATC
1445	azoR1	AAGCTTTGCTCGAAGAAACTATGCAGTGCCAGCAGTGCTTCATACTTATGTTGATTATCTGTCTCGCGCAGGCGTTACATGTATGGACCGGGTCATC
1446	azoR1	AAGCTTTGCTCGAAGAAACTATGAAAGAAAACAACCCTAATGATGAAGTGGTTGAATTAGATCTTCATAAGGAAAACCTTCCTTGTATGGACCGGGTCATC
1447	azoR1	AAGCTTTGCTCGAAGAAACTATGAAAAAAGTTGCGCTTCTTAACGCTCGCGGCGGTGTCTACTCAGAAGGACCAATGGTGTATGGACCGGGTCATC
1448	azoR2	AAGCTTTGCTCGAAGAAACTATGTGTTAACTGATAAAAAAGCAATTCATATCCAAGCGCGCGGCGGCTACTATTCAGAAGGCCTGTATGGACCGGGTCATC
1449	azoR2	AAGCTTTGCTCGAAGAAACTATGTCACTGCTCATCCACATGACGAAGCAACTTCGTACAGTATGGCAACAGGTAAAGCATGTATGGACCGGGTCATC
1450	azoR2	AAGCTTTGCTCGAAGAAACTATGTATGGAACTTCTCATTCCCGCCAGTGATGAAAGCGTATCTCGATTCTGTTGCTGTTGTGTATGGACCGGGTCATC
1451	azoR2	AAGCTTTGCTCGAAGAAACTATGGCGTACCATCATTCGATGGCATTTTCGTAGAGGGACATAATGCGGAGCCTGATAAAGTGTATGGACCGGGTCATC
1452	azoR2	AAGCTTTGCTCGAAGAAACTATGATCGATTTGTACAAAGAAAACATTCCGCACATTGACGCAGATGTATTTAGCGGATGGGGTGTATGGACCGGGTCATC
1453	azoR2	AAGCTTTGCTCGAAGAAACTATGAGCAAATCAAAGAAGACGCGATTGCGCGTGCGAAAGAAGCAGGAAAAACATTCTATGTATGGACCGGGTCATC
1454	azoR2	AAGCTTTGCTCGAAGAAACTATGAAGCGAAAGTAGGCCGTTTGGGAGAGCTTAGCGATCAATTTGCATCAGCTGATAAGTACGTGTATGGACCGGGTCATC
1455	bacA	AAGCTTTGCTCGAAGAAACTATGTTGTATGACATTGCCTTAACCAATGAGCTTGCACGGCAAAAGTACGGGCTAACCTTTGTGTATGGACCGGGTCATC
1456	bacA	AAGCTTTGCTCGAAGAAACTATGTTAAGCATTTCTACATGAGGCCGGATTTGCAGCTATTGCAGATCTTCAGGTGCGATACATGTATGGACCGGGTCATC
1457	bacA	AAGCTTTGCTCGAAGAAACTATGTCAAAAGCATTCCAATGAGCTGGTCATTATTTGGAAAAGGAGACGTTGATGATGAAAACTGTATGGACCGGGTCATC
1458	bacA	AAGCTTTGCTCGAAGAAACTATGCGCAGCAAAGCATTTCATTTCCAATTTTACTCTTCTACAAGGGCTGAACAGTAAATTGTCTGTATGGACCGGGTCATC
1459	bacA	AAGCTTTGCTCGAAGAAACTATGCCCGCAAAGATGTTCGTTTCAAACTAGTCAATTCAACCAGTCAAGCCGCAAGAAAATGTATGGACCGGGTCATC
1460	bacA	AAGCTTTGCTCGAAGAAACTATGATGATACTTTTGAATCGTGCATCGAAAGGACGCTCCAAAGCCCGCTGGAATATACCTGTATGGACCGGGTCATC
1461	bacA	AAGCTTTGCTCGAAGAAACTATGACTGATTCACTATCCAAACTCATTACAGTCAACACGCTCGGCCCTGAGGGGACAAGTGTATGGACCGGGTCATC
1462	bacA	AAGCTTTGCTCGAAGAAACTATGACGGCCTGGCTGTTCGTCCTGATTTTGAATTCAGAGACGATATGCTTGATACATCTGTTTGTATGGACCGGGTCATC
1463	bacB	AAGCTTTGCTCGAAGAAACTATGTCGATTAATATCTTCTTCCCGCCGCGCTATAACAGGGCAAAAGCAAAAAAAATGAAGGCTGTATGGACCGGGTCATC
1464	bacB	AAGCTTTGCTCGAAGAAACTATGTATTTCTGTGAGCCTCGCGAAGATCATGGTGCCATCAACCGTTCAGAAAAAGAATCTGTATGGACCGGGTCATC
1465	bacB	AAGCTTTGCTCGAAGAAACTATGGCCTCACGGGGCAAGAAACGACACAGACCAAGAAGTGATTGCTATTGATATCAAGCTGTATGGACCGGGTCATC
1466	bacB	AAGCTTTGCTCGAAGAAACTATGGATGACTGTCGGAGATGTGACAAGAAAAATGACAGCCTTGGAATCTGCCTATATCGCGTGTATGGACCGGGTCATC
1467	bacB	AAGCTTTGCTCGAAGAAACTATGGATGAAACATATACAAGTCCTGAGGACTACTTTTTGGATATTTTCAAAACAAGAGACCTGTGTATGGACCGGGTCATC
1468	bacB	AAGCTTTGCTCGAAGAAACTATGCTGCCGGGCATGGAAGTCACGTTCTTTGTTGAGGATTGGGTAGAAATTATGCTTGTGTATGGACCGGGTCATC
1469	bacB	AAGCTTTGCTCGAAGAAACTATGCACCGAAATTAATTGAATGGGAAAACGGAGTGAGGCAGTATTCAACCGTACGAGGGGATATGTATGGACCGGGTCATC
1470	bacB	AAGCTTTGCTCGAAGAAACTATGATAAACATCGGAATGAACAAATAGGCATCTGCATCGGCGGCGGCTATGACATGACTGTATGGACCGGGTCATC
1471	bacB	AAGCTTTGCTCGAAGAAACTATGAAGTATTAATGTCTTACGTCCCGCCGCATACCAATGTTGAACCCCATCAGCATAAGGAGGTGTATGGACCGGGTCATC
1472	bacC	AAGCTTTGCTCGAAGAAACTATGTATTCCTGCTTATAACGCCAGCAAAGGCGGGGTTTTGCAGCTGACTAAATCAATGGTGTATGGACCGGGTCATC
1473	bacC	AAGCTTTGCTCGAAGAAACTATGGCAGTTGAATCGGCGGTTCATACATTTGGCGGGCTCGATGTCTTGATTAATAATGTGTATGGACCGGGTCATC
1474	bacC	AAGCTTTGCTCGAAGAAACTATGGAACCTCACCGATAAAACCGTCCTCATCACAGGAGGCGCATCAGGCATTGGTTATTGTATGGACCGGGTCATC
1475	bacC	AAGCTTTGCTCGAAGAAACTATGCTGTTTTTAGCCTCGGATTTATCAAGCTATATGACCGGAAGCGCCATCACCGCAGTGTATGGACCGGGTCATC
1476	bacC	AAGCTTTGCTCGAAGAAACTATGCTATTCACGAGATGGAGCTCAGCGATTGGAACAAGGTGCTGCAAGTCAATTTGACTGTATGGACCGGGTCATC
1477	bacC	AAGCTTTGCTCGAAGAAACTATGCAAGCATATGCTGGCCGCCGGCAAGGGCAACATCATTAATACGTGCTCTGTCGGCTGTATGGACCGGGTCATC
1478	bacC	AAGCTTTGCTCGAAGAAACTATGATGCCCGGGGATCATCGACACACCGCTGAATGAAAAATCATTCCTTGAAAATAATTGTATGGACCGGGTCATC
1479	bacC	AAGCTTTGCTCGAAGAAACTATGAAGCGCAAGGAGAAGCAATGGTACGAAAAGAAAATAATGACAGGCTGCACTTTGTGCATGTATGGACCGGGTCATC
1480	bacC	AAGCTTTGCTCGAAGAAACTATGAAAAAGCGAAGGTAAATCCGCTGCTGAGGCTTGGGAAACCTGAAGAAATCGCAAATTGTATGGACCGGGTCATC
1481	bacD	AAGCTTTGCTCGAAGAAACTATGTTGCTGCATTTGAACTGAAAGGCAGTAATTCACAGGATGTGGCTGAATCAATCAGACATGTATGGACCGGGTCATC
1482	bacD	AAGCTTTGCTCGAAGAAACTATGTTGCCGGCTGGAATATGATCCCCAATATTAAAAAGGTCTTTGGCCTTGATATGGCGTGTATGGACCGGGTCATC
1483	bacD	AAGCTTTGCTCGAAGAAACTATGTTATTGGGCGCATGAAGATCATAACAAGCCTGAGGAAGAGGTCGTCGAGCAAATCTGTATGGACCGGGTCATC
1484	bacD	AAGCTTTGCTCGAAGAAACTATGTATCAGTATAGAAGGCATCATGGCTGACGGTGAGTATTTCCCGATCGCCATTCATGATGTATGGACCGGGTCATC
1485	bacD	AAGCTTTGCTCGAAGAAACTATGGGACGGATTATTGGATCAAGAGCCTTATTATGTTGCCGACTGCCATTTGTACCCGCTGTATGGACCGGGTCATC
1486	bacD	AAGCTTTGCTCGAAGAAACTATGCTTTTAAAAGGGGATACTGAAATCGTTTCTTTTTCGGCCGCAGCACCAGGCACTTCTGTATGGACCGGGTCATC
1487	bacD	AAGCTTTGCTCGAAGAAACTATGCGCTGAAGAATTTTTACAGGGTGAGTACGGAGACTGGTATCAAACAGAAGGGTACTCCGATGTATGGACCGGGTCATC
1488	bacD	AAGCTTTGCTCGAAGAAACTATGATCACAACAAACAATGAATTATTCATTGCTCCGATGGCGAAAGCCTGTGAACGTCTGTGTATGGACCGGGTCATC
1489	bacD	AAGCTTTGCTCGAAGAAACTATGAGATCGGCACACCTCTTATCTTAAAGCCTACATACTTAGCGAGTTCTATCGGTGTAACGCTGTATGGACCGGGTCATC
1490	bacD	AAGCTTTGCTCGAAGAAACTATGACCTGGTCAGCTTTATTCCAAGACCTTTTGCAATTACAGCCTCCCATGCAGCATTGTGTATGGACCGGGTCATC
1491	bacD	AAGCTTTGCTCGAAGAAACTATGACAGTATTGGTCATCGCTGATCTTGGAGGCTGCCCGCCGCACATGTTTTATAAAAGTGTATGGACCGGGTCATC
1492	bacD	AAGCTTTGCTCGAAGAAACTATGACAGAGTCAATGACTATCTGAAATCAATTAACGTGCCAAAGGCGGTTACGTTTGAAGCGCTGTATGGACCGGGTCATC
1493	bacD	AAGCTTTGCTCGAAGAAACTATGAAGGCCGGAGTCAAATCGATCAAAAACAAACGAGTCACAACTCTTGAAGATTTCCGTGTGTATGGACCGGGTCATC
1494	bacD	AAGCTTTGCTCGAAGAAACTATGAAAAAGGCAAATGAAGGGCTTGGACTGCAAAATTGCGCAACACATACAGAGATCAATGTATGGACCGGGTCATC
1495	bacE	AAGCTTTGCTCGAAGAAACTATGTTTTAATCCCGCCCGTCTCGCTGTCATGTCGTCCTTGGAATCAGATATTAAAAGCATCTGTATGGACCGGGTCATC
1496	bacE	AAGCTTTGCTCGAAGAAACTATGTTTCATCGCGATGGAATACGGGGAAGTGCTTGCAAAAGTGAAGGTTCAGGAAAATTGTATGGACCGGGTCATC
1497	bacE	AAGCTTTGCTCGAAGAAACTATGTTAGGCGGATCTGTAGAGCTGGCTGTTGCCTTTAACGGTGTGACATACTTGGTTTCGTGTATGGACCGGGTCATC
1498	bacE	AAGCTTTGCTCGAAGAAACTATGTGGGTGTTCTGGTCGACCGGTTAGACAGAATTAAGATCATGCTGTGGACGGATATCATTGTATGGACCGGGTCATC
1499	bacE	AAGCTTTGCTCGAAGAAACTATGTGCCCTGCTCATTTTGTCTACATATTATCACGATTATTGGGTGACGTCCGGGGTCATTGTATGGACCGGGTCATC
1500	bacE	AAGCTTTGCTCGAAGAAACTATGGTCGTGATCGTATGCGGTTTGTTTTTGCATACGAAGCTCGTCAACAAATCGTTTTTGTGTATGGACCGGGTCATC
1501	bacE	AAGCTTTGCTCGAAGAAACTATGGCTGAAACCCAACTCTAAATACTTGCTTTACGGGCAGGCGCTATCGTTCATGGGAGACTTGTATGGACCGGGTCATC
1502	bacE	AAGCTTTGCTCGAAGAAACTATGGAGGCCTGACGTACTTTACCGTTTTATCCATTGTCTCGCTGGCGCTGTTTTTATTCACATGTATGGACCGGGTCATC
1503	bacE	AAGCTTTGCTCGAAGAAACTATGGAAATCGGCAACTTTATTCTCACGTTCTGCATCGGCTTCGGCGGCTTTATCGGAGTGTATGGACCGGGTCATC
1504	bacE	AAGCTTTGCTCGAAGAAACTATGCGCCATGTTTACGATGATTACAATGGCTTTGCTGTGGGGAGTTGTGTACAGCTATTTTCCTGTATGGACCGGGTCATC
1505	bacE	AAGCTTTGCTCGAAGAAACTATGCGCATCAAGCTGCAATTTGTGCCGATTCAATCTGAAAACATTAAAGAGGCCTTTCATGTATGGACCGGGTCATC
1506	bacE	AAGCTTTGCTCGAAGAAACTATGCATCATCTTTTTGGGGCTCACATTTCTTCCAAAAGGCGAGTATCCGCTGATTTTTCTGTGTATGGACCGGGTCATC
1507	bacE	AAGCTTTGCTCGAAGAAACTATGAGGGCGCATTTTTTCAGTGGCCGAAGCGTCTATCGGATTATGCATTTCTATTGGTTGTATGGACCGGGTCATC
1508	bacE	AAGCTTTGCTCGAAGAAACTATGACGTTATTTGCAAAAGCGACAACCATCTCCATTATCGTCGGGGCGGCTGCCGGAGTGTATGGACCGGGTCATC
1509	bacF	AAGCTTTGCTCGAAGAAACTATGTTATCAGGGATTACGATGGCGCGAGCTGAGCTTTACGAAATGCCGCTGTATGAAGTGTATGGACCGGGTCATC
1510	bacF	AAGCTTTGCTCGAAGAAACTATGTCTATAAAAGGGAATACGGAGTGACAATCAATCCTGAAACGGAAGTCGCGCTTTTCGGATGTATGGACCGGGTCATC
1511	bacF	AAGCTTTGCTCGAAGAAACTATGGTATGTGCTGACACAATGCCTGCTCAATCCGGGAGACATCGCTTTAGTCCCGAATTGTATGGACCGGGTCATC
1512	bacF	AAGCTTTGCTCGAAGAAACTATGGTAGTCACACCGGGCGAAATTTTTGGAAGCAACGGAAAAAGGCATGTCAGAATCTTGTATGGACCGGGTCATC
1513	bacF	AAGCTTTGCTCGAAGAAACTATGGCTTATGTTTTTAAACTATCCGAACAACCCCACTGGAGCTGTGGCTGATGCGGCTTGTATGGACCGGGTCATC
1514	bacF	AAGCTTTGCTCGAAGAAACTATGGCATATTGTCGAGGCTTTGCGGGAGGCTTCTCTGAATCCTTCGTTTCATGGATACTGTATGGACCGGGTCATC
1515	bacF	AAGCTTTGCTCGAAGAAACTATGGCATACGGAATCGTTGAAACGAATTTATAAGGAACGAATTGACTTTTTTACGGCGCTTTGTGTATGGACCGGGTCATC
1516	bacF	AAGCTTTGCTCGAAGAAACTATGGAAAGAGCATAACATCCATTTGATTCATGATTTTGCATACGGGGCGTTTGAATTCGATCATGTATGGACCGGGTCATC
1517	bacF	AAGCTTTGCTCGAAGAAACTATGCCAGCTTTCTTGAGGCAGAGGATGCCAAAACTGTCGGAGCAGAGCTTTATTCATTTTCTGTATGGACCGGGTCATC
1518	bacF	AAGCTTTGCTCGAAGAAACTATGATGGAAATAACACCGTCCGATGTCATCAAGACACTTCCAAGGCAGGAGTTTTCTCTCGTTGTATGGACCGGGTCATC
1519	bacF	AAGCTTTGCTCGAAGAAACTATGAGGAACTGGGCTGGAAGATGGAAAAGCCAAAAGGAACCTTTTACGTATGGGCTGAAATTCTGTATGGACCGGGTCATC
1520	bacF	AAGCTTTGCTCGAAGAAACTATGAATTTGTCACGCGGATTCAAAAGCTGAACCTGCCGTTCGGGTCATTACAAGAAACTGTATGGACCGGGTCATC
1521	bacF	AAGCTTTGCTCGAAGAAACTATGAAAAATCATTCAGGCCGTCAATGAATTTCAGGATCATGTATTTGTCGGCATGTTCGGTGTATGGACCGGGTCATC
1522	bacF	AAGCTTTGCTCGAAGAAACTATGAAAAAACGGGAGCCCATATCATTAATCTCGGACAGGGGAACCCTGACCTTCCCACTTGTATGGACCGGGTCATC
1523	bcaP	AAGCTTTGCTCGAAGAAACTATGTCTGTTCTGCCTGTTCTTGATTTTAAATCTGGGATGGGTGACGATTGTCCGCTTCCTAGTTGTATGGACCGGGTCATC
1524	bcaP	AAGCTTTGCTCGAAGAAACTATGGTTGTCGGCATTTGTCCTGATTTCTGTGGCAGTTATCGTTTTGAGAAAGAAACAGCCTGTGTATGGACCGGGTCATC
1525	bcaP	AAGCTTTGCTCGAAGAAACTATGGTGTTCAGTGCAGCGGCGCTCGTATTCTTTGCTTTTATCGGATTTGACGCTGTATTGTATGGACCGGGTCATC
1526	bcaP	AAGCTTTGCTCGAAGAAACTATGGGTGTGGATCATCCGGTTTCTCTTGTTCTTCAAAGCGCAGGGCAAAATTGGGTGGTGTATGGACCGGGTCATC
1527	bcaP	AAGCTTTGCTCGAAGAAACTATGGGAATTTGCGTCAAGTGTGCCTGTTTCAGGTTCGGTGTATACATTCACTTATGCGACATGTATGGACCGGGTCATC
1528	bcaP	AAGCTTTGCTCGAAGAAACTATGGCGTCATGTTTGCCATGTCGCGTGACGGACTTGTGCCGGGTTCACTTTCTAAAGTTGTATGGACCGGGTCATC
1529	bcaP	AAGCTTTGCTCGAAGAAACTATGATTTTATATGTCACCGTATCAGCCATCATGACTGGGGTTATCCCGTTTGCTCAATTTGCGTGTATGGACCGGGTCATC
1530	bcaP	AAGCTTTGCTCGAAGAAACTATGATTTTAGAATACATGCTGGCGGTAAGTGCAGTGTCGGTCGGCTGGTCTGGTTATTTCCTGTATGGACCGGGTCATC
1531	bcaP	AAGCTTTGCTCGAAGAAACTATGATCGCTGCGACGAGCGGGGAAAAGTCTTTAAAAAGAGAATTAGGGGCATTTGATTTAACGTGTATGGACCGGGTCATC
1532	bcaP	AAGCTTTGCTCGAAGAAACTATGATCATTGATATTGGCGCCGTGTTGGGAATGACAACAGTTATGCTCGTGATGCTTTATGTATGGACCGGGTCATC
1533	bcaP	AAGCTTTGCTCGAAGAAACTATGAGGCACCTTTACCCTGTTTAATCTTCCTGCATTCGTCATTGTAATGGCGATCACATGTATGGACCGGGTCATC
1534	bcaP	AAGCTTTGCTCGAAGAAACTATGACGAAAAATCCCGCGAAGGATCTGCCTAAAGGCATTATTTTCTCTTTACTGGTCTGCACGTGTATGGACCGGGTCATC
1535	bcaP	AAGCTTTGCTCGAAGAAACTATGACAATATCATGGTTATCTTGAAGATACTGGTTGTTCTGCTGTTTATCGCGGTGGCAGCCGTGTATGGACCGGGTCATC
1536	bcaP	AAGCTTTGCTCGAAGAAACTATGAAAGCACAAAACACCTTATGTAGCCACTTGGTTTTTCGGAACGATGTCGGCGCTTTGTATGGACCGGGTCATC
1537	bcd	AAGCTTTGCTCGAAGAAACTATGTGCCGCCACCTGCATGAAGAAGGAGCAAACTTAATCGTTACGGATATCAACAAACAATTGTATGGACCGGGTCATC
1538	bcd	AAGCTTTGCTCGAAGAAACTATGGCCGCTCAAGAAGCCAGTTTTTGCAAAACGGCCACAGTGTATTAAGCAGACGTTATGTATGGACCGGGTCATC
1539	bcd	AAGCTTTGCTCGAAGAAACTATGGATGTGGGCACAACGGTCGAGGATATGGATATCATTCATGATGAGACAGACTATGTCACATGTATGGACCGGGTCATC
1540	bcd	AAGCTTTGCTCGAAGAAACTATGGACGGCATTCCTGCATATTTAGCGGCTGACCGCTTAGCAGAGGAACGGATTGAACTGTATGGACCGGGTCATC
1541	bcd	AAGCTTTGCTCGAAGAAACTATGCTTTCGGCTCTTCTGGAAATCCGTCCCCAGTCACAGCGTACGGGGTGTACAGAGGAATTGTATGGACCGGGTCATC
1542	bcd	AAGCTTTGCTCGAAGAAACTATGCGGATTACGTGATTAACGCGGGCGGTGTCATCAACGTGGCAGATGAGCTTTACGGCTATATGTATGGACCGGGTCATC
1543	bcd	AAGCTTTGCTCGAAGAAACTATGCGAACAATTGGTATTCTGCCAGGATGAACAATCTGGATTAAAAGCGATTATCGCCATTCATGTATGGACCGGGTCATC
1544	bcd	AAGCTTTGCTCGAAGAAACTATGCCTTGGTGCGACTATTAACGACGACACCATTAAACAGCTGAAGGCGAAAGTGATCGTGTATGGACCGGGTCATC
1545	bcd	AAGCTTTGCTCGAAGAAACTATGCCGTGCGGTAGATCCTGATGACATTTATTCACAAGACTGCGATATTTATGCGCCGTGTATGGACCGGGTCATC
1546	bcd	AAGCTTTGCTCGAAGAAACTATGATGCAGAACGTGCATTGAAAAAAGTTGAAGGCATTTACGGCAATATCGAGCGTGTACTTGTGTATGGACCGGGTCATC
1547	bcd	AAGCTTTGCTCGAAGAAACTATGAGGCAGCAGCTAAAGCTGCTTTCGGAACCGACTCTCTTGAAGGAAAAACCATTGCTTGTATGGACCGGGTCATC
1548	bcd	AAGCTTTGCTCGAAGAAACTATGAGGAAATGTTCCGCGCGTTTGGCCGCTATATTCAAGGACTGAATGGCAGATACATTGTATGGACCGGGTCATC
1549	bcd	AAGCTTTGCTCGAAGAAACTATGACCAATTAAAAGAGACACGCCATGGTGATCAAATTCACGAAATGGGCATCGTTTATGCTGTATGGACCGGGTCATC
1550	bcd	AAGCTTTGCTCGAAGAAACTATGAAGAAGCGGCAATTGAAGATGCGCTCAGATTGGCAAGAGGCATGACCTATAAGAATGTATGGACCGGGTCATC
1551	bceA	AAGCTTTGCTCGAAGAAACTATGTTATTATGGTTACCCATGATCCCGTCGCTGCCAGCTACTGCGGCAGAGTCATTTTTATTGTATGGACCGGGTCATC
1552	bceA	AAGCTTTGCTCGAAGAAACTATGTGGTGATTTTAGAAGCGAATAAAATTCGAAAAAGTTATGGAAACAAGCTGAATAAACAGGTGTATGGACCGGGTCATC
1553	bceA	AAGCTTTGCTCGAAGAAACTATGTGCTCAACGTTCTGTCCTCAATCGATCAGGTCAGTCACGGAACCATTCATATTAATGGTGTATGGACCGGGTCATC
1554	bceA	AAGCTTTGCTCGAAGAAACTATGTGACATGACGGCTATGAAGGAAAAGCAGCTGGCTGAATTTAGAAAACAGCATTTAGGCTTTGTATGGACCGGGTCATC
1555	bceA	AAGCTTTGCTCGAAGAAACTATGGAAATCGGCCTCCGATCTATTAAATAAGCTGAGCCAGCTCAATCAAAAACGCAACGCTGTATGGACCGGGTCATC
1556	bceA	AAGCTTTGCTCGAAGAAACTATGCAGGATTACAATTTGTTAGACACATTGACAGTGAAAGAGAATATCCTTCTGCCTTTATCGTGTATGGACCGGGTCATC
1557	bceA	AAGCTTTGCTCGAAGAAACTATGAGCAGAGAACATCCGCTGGAAGAGCGTTTATTCATGACCCGAGCATTATTTTCGCTTGTATGGACCGGGTCATC
1558	bceA	AAGCTTTGCTCGAAGAAACTATGACGAAACTATCAAAAAAGGAAGCCAATCGCAAGTTTGAGGAAGTTGCCAAGGAACTGGGTGTATGGACCGGGTCATC
1559	bceA	AAGCTTTGCTCGAAGAAACTATGAATAAAGGGGGCCAGGACAGGCAAACGTTTTTCCAGGATATTATGAAAACGCAAGGCTGTATGGACCGGGTCATC
1560	bceA	AAGCTTTGCTCGAAGAAACTATGAAGTGCTGAAGGGCATCGATATTCACATTGAAAAGGGCGAATTCGTCAGTATTATGGGTGTGTATGGACCGGGTCATC
1561	bceB	AAGCTTTGCTCGAAGAAACTATGTTAAACAGCTGGACAAGGATAAAGACCCCCGCATTCAGCTGGCGCAATCTACATTTATCTGTATGGACCGGGTCATC
1562	bceB	AAGCTTTGCTCGAAGAAACTATGTGGTTTTCAAGGACTCTGGTGTTATTAAAGTAAAAAGCAAGCACGAGACGCAGCCATGTATGGACCGGGTCATC
1563	bceB	AAGCTTTGCTCGAAGAAACTATGTATGCAGCTTGCTGTTGTTAGCGACAAAGATGTAAAAGGAGTCGATGTGGCGGCTTGTATGGACCGGGTCATC
1564	bceB	AAGCTTTGCTCGAAGAAACTATGTAACGAAGTGAAGGCTTCAATCAAGGGAGCCGCGGCTATTAAAACCGCTTCGATTTGTATGGACCGGGTCATC
1565	bceB	AAGCTTTGCTCGAAGAAACTATGGGTAGCGGCCGGGTTTTCGATATCGAAGCTTGTCTTGATGATTCTGTTCAAAATTGTCTGTATGGACCGGGTCATC
1566	bceB	AAGCTTTGCTCGAAGAAACTATGGGCGGAAAATTTAAGACCATTAATGAACTGTTTGTTGCGATGAGCTTCATTCTGGGGAGCTGTATGGACCGGGTCATC
1567	bceB	AAGCTTTGCTCGAAGAAACTATGGCTGCGCAAAAATCACTGTTTGGTATGGTGATGTTCATCGTCGGCTTCTTAGGGTTATGTATGGACCGGGTCATC
1568	bceB	AAGCTTTGCTCGAAGAAACTATGGATGCGAAACTGCATTTTTCTGAGCAGGCCTTGGTCCAAACGGTCATTGTGTTCTTGTATGGACCGGGTCATC
1569	bceB	AAGCTTTGCTCGAAGAAACTATGCTTCCACAGTTACTTTGCCGTCCAATCCGGCTGGTTCTTATTCGGATCAGAGGTATGTGTATGGACCGGGTCATC
1570	bceB	AAGCTTTGCTCGAAGAAACTATGCTGATCGGCGCTTTAGGCATCGTGTTGATTTTGACAGGATACTATGTGTCTTCTGAGCTGTGTATGGACCGGGTCATC
1571	bceB	AAGCTTTGCTCGAAGAAACTATGCGTTTCAGCGCTCGCCATCGGGCTGTTATCTCTTGCTTACATCTCGTATTACTCGTTGTATGGACCGGGTCATC
1572	bceB	AAGCTTTGCTCGAAGAAACTATGCGGCTTTACGCAGGGCGACCTGATAAAGGGGATACGCATCAAACAAATGTACAACTTGTATGGACCGGGTCATC
1573	bceB	AAGCTTTGCTCGAAGAAACTATGCACCTGTCCTGCAAGCAAATGTTGACATTGCAAATATTATGGATGGAACTCCGAAAGAGATGTATGGACCGGGTCATC
1574	bceB	AAGCTTTGCTCGAAGAAACTATGAAAGGATTAAGAGAAGAGTTTCTTGTGTCCTACACGTTTACAAGCGGGGGCATGCCCGTGTATGGACCGGGTCATC
1575	bceB	AAGCTTTGCTCGAAGAAACTATGAAAGACCGCTGAACAAAATGTAGCGGCTGATTTTTCATTCATGAATGAGAAAGATGCCAATGTATGGACCGGGTCATC
1576	bceR	AAGCTTTGCTCGAAGAAACTATGGGTCAAATGTTCCGATTCTCTTTTTATCCTCCCGGGATCATCCTGCTGATATGGTGATGTATGGACCGGGTCATC
1577	bceR	AAGCTTTGCTCGAAGAAACTATGGCGGTTAATCCTGATTGTGTCATTATTGATGTGCAGCTGCCTAAATTTGACGGCTTTCATGTATGGACCGGGTCATC
1578	bceR	AAGCTTTGCTCGAAGAAACTATGGATCAGAAGCTTGTGGAACGATGAGCGTTTTGTTAGTGATAATACGCTGACCGTCAATGTGTATGGACCGGGTCATC
1579	bceR	AAGCTTTGCTCGAAGAAACTATGCGGAGCAGAACCTCGTCAGCAATGACAAAGGATCTGTTGAACTGACCAAAAATGAAATTGTATGGACCGGGTCATC
1580	bceR	AAGCTTTGCTCGAAGAAACTATGCGCTGTTTCATGAAATCAAGGATCGTTTAACGGGATGGTCCTATGATGTATACGGCATTCTGTATGGACCGGGTCATC
1581	bceR	AAGCTTTGCTCGAAGAAACTATGCGAAAATCCAAGCGATGTTCCGGCGTGTGCACCATTATAATACGGAGCCGAGTACTGTATGGACCGGGTCATC
1582	bceR	AAGCTTTGCTCGAAGAAACTATGCCATGCAGCTCGGGGCAGATGACTTTATTCAAAAGCCATTTCATTTTGATGTGCTTGTATGGACCGGGTCATC
1583	bceR	AAGCTTTGCTCGAAGAAACTATGAAAAAAACTGGACGCCCTGCAGCTTGGTGCATATATCGAGACAAAGGTGGGCCAGTGTATGGACCGGGTCATC
1584	bceS	AAGCTTTGCTCGAAGAAACTATGTTGAAAACATGGGAGAACAATCTCGATGTGACAGCCATAAATGAACCGGAAACGCTGTATGGACCGGGTCATC
1585	bceS	AAGCTTTGCTCGAAGAAACTATGTGGTGTATTTGTGCATCTTGTTTTTTATCATATTCCTTTGGTTCCGCTATCGGAAAGAAATGTATGGACCGGGTCATC
1586	bceS	AAGCTTTGCTCGAAGAAACTATGTGGAAGAAAAAGCACTGAAATCCCAGCTGTCATATGAATGGCTGCGTATTCACCTGTGTATGGACCGGGTCATC
1587	bceS	AAGCTTTGCTCGAAGAAACTATGTGATGTTGAGTCGGAGTTTGGTGCGGGAACAGTTTTTACATTAACCTTTCCAATACGGAATGTATGGACCGGGTCATC
1588	bceS	AAGCTTTGCTCGAAGAAACTATGTGAAAAAGATGAGCTGATGGCATGGATCCATGAGGTCAAAACTCCATTAACAGCGATGTATGGACCGGGTCATC
1589	bceS	AAGCTTTGCTCGAAGAAACTATGTCCAAGTGAAAGATTGTGGCAGGGGCATTGATCCAAAAGATGTACCGCGTATTTTTTGTATGGACCGGGTCATC
1590	bceS	AAGCTTTGCTCGAAGAAACTATGTCAGCAGCTTCATCAAAAACGCATTTCATTTATTGAAAACGACCTGTCAGTAGAATTCATGTATGGACCGGGTCATC
1591	bceS	AAGCTTTGCTCGAAGAAACTATGGCAGGCTTTGATGCTGTTCATTGCTTTTGTCGATCCTTCCATATCATTTGGGAATGTGTATGGACCGGGTCATC
1592	bceS	AAGCTTTGCTCGAAGAAACTATGGAAGCAATGGTTGAAAGAAGCATTGCCGGGCAAACAGAACACTTGAAGCAGACCGTGTATGGACCGGGTCATC
1593	bceS	AAGCTTTGCTCGAAGAAACTATGATCACCATGATCAAGCGTCAACTGGCATGGGGCTGTACTTGGCAAAAAAAGCAGCTGTATGGACCGGGTCATC
1594	bceS	AAGCTTTGCTCGAAGAAACTATGAGCTGCTGACAAACGCGGTGAAATACAGCGAAGCCTCTGAAATCGAGATCAAAAGTGTATGGACCGGGTCATC
1595	bceS	AAGCTTTGCTCGAAGAAACTATGAAGATTTACAATCGTGGTGTATCCAAAAAGGGATCGGTTTTGACATACAGCTCGAGGCCATGTATGGACCGGGTCATC
1596	bcrC	AAGCTTTGCTCGAAGAAACTATGTTGAACTACGAAATTTTTAAAGCAATCCATGGACTATCTCATCACAATTCAGTTCTCGATGTATGGACCGGGTCATC
1597	bcrC	AAGCTTTGCTCGAAGAAACTATGTCGCCCGTTCGTCGATTTGGTCGTGAGGATCTACGAAGCCATTATCAATAAACTGTGTATGGACCGGGTCATC
1598	bcrC	AAGCTTTGCTCGAAGAAACTATGGGGAACACACAAAGCAGAAAACATGTGCTATACGCAGGCATCACAGGAATTGCAGTGTATGGACCGGGTCATC
1599	bcrC	AAGCTTTGCTCGAAGAAACTATGGACAGGCTTTTCGAGAATTTGGGTGGGACATCACTATCCGGTAGATGTATTGGGCAGTGTATGGACCGGGTCATC
1600	bcrC	AAGCTTTGCTCGAAGAAACTATGCCATTATGGTCTTCATCACGGAATATGCCATTGTCGCCTATGCCCTTATCCTATTGGCTGTATGGACCGGGTCATC
1601	bcrC	AAGCTTTGCTCGAAGAAACTATGCATACGACAGGTGCATTAGCGATTTCTATTGCGATGCTTTTCAGAAACCGCAAAATCGTGTATGGACCGGGTCATC
1602	bcrC	AAGCTTTGCTCGAAGAAACTATGAACTATTTGATTACGCTTGTTTATTTCGAACCGCGCCCGTTCGTTGCGCATACAGTGTATGGACCGGGTCATC
1603	bdbA	AAGCTTTGCTCGAAGAAACTATGTTTATAATGATATAAATTTAACTCAATATCAAAAAGAAGTAGACTCTAAAAAACCTAAATGTATGGACCGGGTCATC
1604	bdbA	AAGCTTTGCTCGAAGAAACTATGTGTTTATGAGACAAGTTGTCCTCCTTGTCAAGAAATAAAACCTGAGTTAAATGAAGTAATGTATGGACCGGGTCATC
1605	bdbA	AAGCTTTGCTCGAAGAAACTATGTGAAAAAGTGGATTGTTTTATTTCTTGTTTTAATAGCAGCAGCCATTAGTATTTTCGTTTTGTATGGACCGGGTCATC
1606	bdbA	AAGCTTTGCTCGAAGAAACTATGTCGGTTAGAGGGCTATAGAAGTGCAAGCCAAATAGAAAAGTTCTTTGATAAAAATGGTGATGTATGGACCGGGTCATC
1607	bdbA	AAGCTTTGCTCGAAGAAACTATGAGATAAATATAATTTGAATAAAACTCCAACGATTCTCTATTACAAAGATGGCAAAGAAAATGTATGGACCGGGTCATC
1608	bdbA	AAGCTTTGCTCGAAGAAACTATGAAAAGTTAAAAGTACAGGCTTTAAATATTGAAGAAAAGGAAAATTATAACACTGAATTTTTGTATGGACCGGGTCATC
1609	bdbB	AAGCTTTGCTCGAAGAAACTATGTCTTTGGCACAATGGCTAGTTTATTCTACAGTGAGATCATGCATTTCAAACCATGTGTTCTGTATGGACCGGGTCATC
1610	bdbB	AAGCTTTGCTCGAAGAAACTATGGTTGTTTTCCTTTCATCAATTGGATTGATTATTGCGTTTTATCATTATATTATCCAACTTTGTATGGACCGGGTCATC
1611	bdbB	AAGCTTTGCTCGAAGAAACTATGGGCTTTATTACATTACCCTTAATGAGTTCAGTATGTTTTGCATTGATATTTGGTATAGGATGTATGGACCGGGTCATC
1612	bdbB	AAGCTTTGCTCGAAGAAACTATGCTGAAATTAATTATCAAAAGCAAGAAATTAAAACAAAATCAACATGTATATAATTGATGTATGGACCGGGTCATC
1613	bdbB	AAGCTTTGCTCGAAGAAACTATGCACAAAGCAAAAGTGTCGTATGTGAAATTGGAACCAACAGCTGCGCAAAAATTGAATGTATGGACCGGGTCATC
1614	bdbB	AAGCTTTGCTCGAAGAAACTATGATGTTGGTATCAAAGAATATTTCTATATCCTATACCTATTATCTTACTAATAGGCTTATTTGTATGGACCGGGTCATC
1615	bdbC	AAGCTTTGCTCGAAGAAACTATGTCGTATTTTTATATGCTTCCTGGGTTGTGGCTCTTATCGCTATGCTGGGCAGCCTGTGTATGGACCGGGTCATC
1616	bdbC	AAGCTTTGCTCGAAGAAACTATGTCCCGATGGCGATTATTGGGGCATTCATTTCGATCATGCATTACTTAGAGCAAAAATGTATGGACCGGGTCATC
1617	bdbC	AAGCTTTGCTCGAAGAAACTATGCTGATTGCTTTTATCCTGATTATCATTTTTATGTGCCTGCTGAAAGGCGAAAAATCTGAATGTATGGACCGGGTCATC
1618	bdbC	AAGCTTTGCTCGAAGAAACTATGCGTGCCGTGCTCGGGCCAATATATTAACTGGTTTGGTTTTATTACGATTCCATTCCTGGTGTATGGACCGGGTCATC
1619	bdbC	AAGCTTTGCTCGAAGAAACTATGCATGTGAACTGTGCTGGTACCAGCGTATCCTCATGTATCCGCTCGTCCTGATTTTTGTATGGACCGGGTCATC
1620	bdbD	AAGCTTTGCTCGAAGAAACTATGTGAACATACAGGCAACACCGACGATTTACGTCAATGATAAAGTGATCAAAAATTTTGCGGTGTATGGACCGGGTCATC
1621	bdbD	AAGCTTTGCTCGAAGAAACTATGTCCGTCTTGCAAGGTGTTTAACAGTGACATCTTTCCAAAAATACAAAAAGACTTTATTGATGTATGGACCGGGTCATC
1622	bdbD	AAGCTTTGCTCGAAGAAACTATGGGTAACCCCAGGCCTCCTTGGTGATCTTGCAAAAAGCACCACAAAGATAAAACCTGTGTATGGACCGGGTCATC
1623	bdbD	AAGCTTTGCTCGAAGAAACTATGGCTCAAGGAAAATCTTGATAAGGAAACATTCGCTTCTCAAGTGGAAAAGGATTCTGACCTTGTATGGACCGGGTCATC
1624	bdbD	AAGCTTTGCTCGAAGAAACTATGGCCTGTGCTTGGCAAGGACGATGCACCGGTAACTGTAGTAGAATTCGGAGATTACAATGTATGGACCGGGTCATC
1625	bdbD	AAGCTTTGCTCGAAGAAACTATGCTAGCAGCCATTGTCATCATTAATAACAAAACGGAACAAGGCAATGATGCGGTGTCCTGTATGGACCGGGTCATC
1626	bdbD	AAGCTTTGCTCGAAGAAACTATGCCTGACTCTTTCTGGGATTTCCATGAAAAGCTGTTCGAAAAACAGCCGGATACGGTGTATGGACCGGGTCATC
1627	bdbD	AAGCTTTGCTCGAAGAAACTATGACGTCATGTTCCATGGAAAAGGTTCAAGGTTAGCGGCTCTTGCATCTGAAGAAGTATGGTGTATGGACCGGGTCATC
1628	bdbD	AAGCTTTGCTCGAAGAAACTATGAAGAAACAGCAGTCTTCTGCGAAATTCGCGGTCATCCTTACGGTTGTGGTTGTTGTATTTGTATGGACCGGGTCATC
1629	bdhA	AAGCTTTGCTCGAAGAAACTATGGCGGCGGTTTCTCTGAATACGTCTCTGTGGATGAAGAGCTTTTGTTCAAACTTCCTGATTGTATGGACCGGGTCATC
1630	bdhA	AAGCTTTGCTCGAAGAAACTATGGCATAACCAAAAGGATATCCGTATTGAACATATCGAAGAGCCAAAAACGGAGCCGGGAAATGTATGGACCGGGTCATC
1631	bdhA	AAGCTTTGCTCGAAGAAACTATGCTAAAACAGACGATGTAGTCGCTGAGATTGCAGAACGTACAGGAGGCGGTGTTGACGTAGTGTATGGACCGGGTCATC
1632	bdhA	AAGCTTTGCTCGAAGAAACTATGCGGTGCAACTGATATTTACGCTGTTGAGCTTTCTCCTGAACGCCAGCAAAAAGCTTGTATGGACCGGGTCATC
1633	bdhA	AAGCTTTGCTCGAAGAAACTATGCGGATACCGCGACATCTTCCCGGCTGTATTGTCATTAATGAAAGAAGGCTATTTCTCAGCTGTATGGACCGGGTCATC
1634	bdhA	AAGCTTTGCTCGAAGAAACTATGCGATCTTTATTCCGGTTGACAAACCGCACCCATTAACAAATGAAACGGCACCTGTTGTATGGACCGGGTCATC
1635	bdhA	AAGCTTTGCTCGAAGAAACTATGCGACAAACTCGTAACGAAAAAAATCGTACTAGATGATTTGATCGAGGAAGGCTTCGGGGCTGTATGGACCGGGTCATC
1636	bdhA	AAGCTTTGCTCGAAGAAACTATGCCGGTGAAGTTGTCGAAGTCGGAGAAGGCGTTGAAAATTATAAAGTTGGAGACCGCTGTATGGACCGGGTCATC
1637	bdhA	AAGCTTTGCTCGAAGAAACTATGCATTCGAAGTCACTGGTGTCCCAGTGGTGTTACGACAAGCCATCCAGTCCACTACTGTATGGACCGGGTCATC
1638	bdhA	AAGCTTTGCTCGAAGAAACTATGCATCGTCAGCATTTGGGAAAAAGGTGCTGAAATCCATCCGAACGATATCGTAATCAAAGTGTATGGACCGGGTCATC
1639	bdhA	AAGCTTTGCTCGAAGAAACTATGATTTTTGCTACACACGGCCACCAAGGCGCCTACAACCTTGATGAACAAATGGGATTGTATGGACCGGGTCATC
1640	bdhA	AAGCTTTGCTCGAAGAAACTATGATCATATGAACAAGGCGCGCTCGTTGAACCTTCTGCAGTTGCTCTATACGCTGTCTGTATGGACCGGGTCATC
1641	bdhA	AAGCTTTGCTCGAAGAAACTATGACAAAGCGGCTGTATTCGGCTGCGGCCCGATCGGACTTCTTGTCATTGAAGCGCTTGTATGGACCGGGTCATC
1642	bdhA	AAGCTTTGCTCGAAGAAACTATGAAAGATCAAAGTCAAATGGTGCGGCATCTGCGGAAGTGATTTACACGAATATCTGGGTGTATGGACCGGGTCATC
1643	besA	AAGCTTTGCTCGAAGAAACTATGTTTTTATCTCGAAACCTAGTACGCCGCCGCCACCCGCTGGTTATCCTGTGATTTATTGTATGGACCGGGTCATC
1644	besA	AAGCTTTGCTCGAAGAAACTATGTGGCGGAGCGGAGGGCTTTTTCAGATTTATTGAAGAGGATTTAAAACCGGAGATAGAACGTGTATGGACCGGGTCATC
1645	besA	AAGCTTTGCTCGAAGAAACTATGTGGCCGTTTTATCTGAACAAGGTATACGGGCAGAATTTTGCGAGTTTTCAGGAGAAGGATGTATGGACCGGGTCATC
1646	besA	AAGCTTTGCTCGAAGAAACTATGTCGCGGGAAGTCCGTCCATTCATTGGAATAAACCGTTTATTCTCAAGAAAACGGATGTATGGACCGGGTCATC
1647	besA	AAGCTTTGCTCGAAGAAACTATGGGATGCCAATTCTGTCTTCGGAACGATGACGGAAGCCGTTCGAATACAGGGACGCTGTATGGACCGGGTCATC
1648	besA	AAGCTTTGCTCGAAGAAACTATGCTGCTTGCCGCAGGAGAATTAGAGCAGCATCATAAAAGCCGGATGAATGATAATGCTGTATGGACCGGGTCATC
1649	besA	AAGCTTTGCTCGAAGAAACTATGATTGGCTATGAGACAGCGGAGCCGTTCTCCTCAGCACGCCACCGGGATTTTACAATTGTATGGACCGGGTCATC
1650	besA	AAGCTTTGCTCGAAGAAACTATGATATTTCAGTTCTTCCTGTTTTGGTCAGCAGGGCGCTGCGTTTTGCGCTTCACCCTTGTATGGACCGGGTCATC
1651	besA	AAGCTTTGCTCGAAGAAACTATGAAAGAACAAACAACAGACCGGACAAATGGCGGGACATCAAACGCATTTACGATTCTGTATGGACCGGGTCATC
1652	besA	AAGCTTTGCTCGAAGAAACTATGAAAAAAGACAAACAATCTTTGGCCATTCGCTCGGAGGGCTTTTCGTGCTGCAGGTTGTATGGACCGGGTCATC
1653	bglA	AAGCTTTGCTCGAAGAAACTATGTTCGAAGACGGCGATGATGAGATTTTAAGAAACGGAACCGTCGATTACTTAGGCTTCAGCTGTATGGACCGGGTCATC
1654	bglA	AAGCTTTGCTCGAAGAAACTATGTCAACAACTGTGAAAAGCGATGTGAAAAATGATAACACTGGCGATATTGTAAATGGCGGCTGTATGGACCGGGTCATC
1655	bglA	AAGCTTTGCTCGAAGAAACTATGGTGACTGGGGATGGGCGATTGATCCAACCGGGTTGAGATATACGTTAAATCGTTTTTATGTGTATGGACCGGGTCATC
1656	bglA	AAGCTTTGCTCGAAGAAACTATGGCCGGTCATTACCCTGTCTCACTTTGAAATGCCGCTGCACCTGGCAAGAGAATATTGTATGGACCGGGTCATC
1657	bglA	AAGCTTTGCTCGAAGAAACTATGGAAAACGAAAACGCCAAGGAAGTCATGTATCAAACGGCGCACCATGAATTAGTGGTGTATGGACCGGGTCATC
1658	bglA	AAGCTTTGCTCGAAGAAACTATGCTTCAGAAACCGGAAAGTCGTGGACTTCTTCGTCAACTTCGCAGAGGCTTGCTTTACTGTATGGACCGGGTCATC
1659	bglA	AAGCTTTGCTCGAAGAAACTATGCATGATCCGGAACGCATTCAATATTTAAAATCGCATATTGAAGCATTGAAAAAAGCGGTCTGTATGGACCGGGTCATC
1660	bglA	AAGCTTTGCTCGAAGAAACTATGAGGCGATGAGGCTGAACCGAACGAAGCTGGTTTGCAGTTTTATGATGATGTGTTTTGTATGGACCGGGTCATC
1661	bglA	AAGCTTTGCTCGAAGAAACTATGAGGAAGATATCGCTTTGTTTGCGGAAATGGGATTAAAATGTCTGCGGACGTCCATCTGTATGGACCGGGTCATC
1662	bglA	AAGCTTTGCTCGAAGAAACTATGACGTACGATGGTGTTGATTTAATTGGCTACACGCCGTGGGGCATTATTGATATTGTCTCCTGTATGGACCGGGTCATC
1663	bglA	AAGCTTTGCTCGAAGAAACTATGAAGGAAAAGACATCAATCCAGAGTTCCAGATTGGGGCCATGGTATCACACGTGCCTGTATGGACCGGGTCATC
1664	bglA	AAGCTTTGCTCGAAGAAACTATGAACCAAATGGATGTGAACAATCCGCTGTTCCTATGGACGAATTCAGGTGTTGTGGTTGTATGGACCGGGTCATC
1665	bglA	AAGCTTTGCTCGAAGAAACTATGAACATGCCAAAGGATTTTTTATGGGGCGGTGCTTTAGCTGCCCACCAATTTGAAGTGTATGGACCGGGTCATC
1666	bglA	AAGCTTTGCTCGAAGAAACTATGAAATGAGGCAGCGCTATTTCTTCCCTGATGTGCAGGTTCGCGGTTATTATCCAAGTGTATGGACCGGGTCATC
1667	bglC	AAGCTTTGCTCGAAGAAACTATGTCAGGAACATTCGTTAGAGAAAACATTCTCGGCACCAAAGATTCGACGAAGGACATTCCTTGTATGGACCGGGTCATC
1668	bglC	AAGCTTTGCTCGAAGAAACTATGTATTGATTACGTTATTGACAATGGGCGGCATGATAGCTTCGCCGGCATCAGCAGCTGTATGGACCGGGTCATC
1669	bglC	AAGCTTTGCTCGAAGAAACTATGGTCTGGCAATGGCGGTGTATTCCTTGATCAATCGAGGGAATGGCTGAAATATCTCTGTATGGACCGGGTCATC
1670	bglC	AAGCTTTGCTCGAAGAAACTATGGCTGCCGATGACCAGCTAAAAGATGCAAACGTTATGTACGCACTTCATTTTTATGCCGTGTATGGACCGGGTCATC
1671	bglC	AAGCTTTGCTCGAAGAAACTATGGCAGCGATGTATACGGCAGATGGCGGTTATATTGACAACCCGTCCGTGAAAAATATGTATGGACCGGGTCATC
1672	bglC	AAGCTTTGCTCGAAGAAACTATGGATACCTATCTGGAACTTGGATTTAAAAACGGAACGTTGGCACCGGGAGCAAGCATGTATGGACCGGGTCATC
1673	bglC	AAGCTTTGCTCGAAGAAACTATGCTCCGTCTTCACAATGATGACTGGAGCAATTATGCACAAAGCGGCGATTATTCCTTTTTTGTATGGACCGGGTCATC
1674	bglC	AAGCTTTGCTCGAAGAAACTATGCGGGATAAAGCAAACTATGCACTCAGCAAAGGAGCACCTATTTTTGTGACAGAGTGGGGTGTATGGACCGGGTCATC
1675	bglC	AAGCTTTGCTCGAAGAAACTATGCGGCAATACCACGGTTGATTTAAAAGATGTCACTGCCCGTTACTGGTATAAAGCGAAAAATGTATGGACCGGGTCATC
1676	bglC	AAGCTTTGCTCGAAGAAACTATGCGGCAAAAGAGCTTGGGATATATGTCATCATTGACTGGCATATCTTAAATGACGGTAATCTGTATGGACCGGGTCATC
1677	bglC	AAGCTTTGCTCGAAGAAACTATGCCAGTAGCCAAGAATGGCCAGCTTAGCATAAAAGGTACACAGCTCGTTAACCGAGACGGTTGTATGGACCGGGTCATC
1678	bglC	AAGCTTTGCTCGAAGAAACTATGCAAGGAAATGTCAAGCCTTTACGGAAACACGCCAAACGTCATTTATGAAATTGCAAACGTGTATGGACCGGGTCATC
1679	bglC	AAGCTTTGCTCGAAGAAACTATGAGCGGTACAGCTGAAGGGGATCAGTTCACACGGATTGCAATGGTATGGAGAATATGTTGTATGGACCGGGTCATC
1680	bglC	AAGCTTTGCTCGAAGAAACTATGACTACGCGCAGATTGGATGCGGCAATGTGACACACAAGTTTGTGACGTTGCATAAACTGTATGGACCGGGTCATC
1681	bglH	AAGCTTTGCTCGAAGAAACTATGTTTAACCGCATCAAGAAAAAAAGCTTCAACTGGTATCAGCAGGTTATCGCCACAAACGGATGTATGGACCGGGTCATC
1682	bglH	AAGCTTTGCTCGAAGAAACTATGTCAGGCAAGAGGCGCATACCCGGGATATATGAAACGCTATCTGGCAGAAAACAATTGTATGGACCGGGTCATC
1683	bglH	AAGCTTTGCTCGAAGAAACTATGTAGACAAGGTTGAAGAGGACGGCACGATTCAGGACGATTACAGAATCAACTATCTGCGTGTGTATGGACCGGGTCATC
1684	bglH	AAGCTTTGCTCGAAGAAACTATGTACGGTGGATTATATTGGATTTAGCTACTACATGTCGATGGCGGCGAGCACAGATCCGTGTATGGACCGGGTCATC
1685	bglH	AAGCTTTGCTCGAAGAAACTATGGTTGAATTAATCGGATACACATCATGGGGGCCAATTGACCTTGTCAGCGCATCTATGTATGGACCGGGTCATC
1686	bglH	AAGCTTTGCTCGAAGAAACTATGGAGGATATCGCCTTATTTGCAGAAATGGGATTTAAGGCGTTCCGCACATCGATTGTGTATGGACCGGGTCATC
1687	bglH	AAGCTTTGCTCGAAGAAACTATGCTGTCGTAACCATCTCTCATTATGAGATGCCGCTCGGTTTAGTGAAAAATTATGGCGGCTGTATGGACCGGGTCATC
1688	bglH	AAGCTTTGCTCGAAGAAACTATGCAAGTGGAGGGTGCTTATAACGAGGGTGGTAAGGGGCTTTCGACAGCTGACGTATTGTATGGACCGGGTCATC
1689	bglH	AAGCTTTGCTCGAAGAAACTATGATGATAGCGGCAACGACAACCTATCCGATGACTTCTAAGCCGGAGGATGTCTTCGTGTATGGACCGGGTCATC
1690	bglH	AAGCTTTGCTCGAAGAAACTATGAGTCAAAAACCCTTACCTCAAATCATCAGAATGGGGCTGGCAGATTGATCCGAAAGGTGTATGGACCGGGTCATC
1691	bglH	AAGCTTTGCTCGAAGAAACTATGAGTATTGGATGACGTTTAATGAAATTAACGTAGTGCTCCATGCGCCATTTACCGGAGGCGTGTATGGACCGGGTCATC
1692	bglH	AAGCTTTGCTCGAAGAAACTATGAGAATTTTTCCGAATGGCGATGAAGAGGAGCCCAATGAAGAAGGCCTCAGATTTTATGATGTATGGACCGGGTCATC
1693	bglH	AAGCTTTGCTCGAAGAAACTATGACGGGATCATGTCTCCATTTGATGAATCAATGACTTCCTTGAATCTGTATCACAACGGGATGTATGGACCGGGTCATC
1694	bglH	AAGCTTTGCTCGAAGAAACTATGAAAACAAATTAAACGCGATGTACCAGGCGGCACACCACCAATTTGTGGCCAGTGCTTGTATGGACCGGGTCATC
1695	bglP	AAGCTTTGCTCGAAGAAACTATGTTAAGTGAAGTCAAAGACGGAGTGTTTTCTGCTGGGGTCATGGGAAAAGGATTTGCCTGTATGGACCGGGTCATC
1696	bglP	AAGCTTTGCTCGAAGAAACTATGGTTTTACGGCATGACGGGTGTTGCTTCCTATATCGTCGGGGGGAATGCAGGTCTGTGTATGGACCGGGTCATC
1697	bglP	AAGCTTTGCTCGAAGAAACTATGGGCAATGATTTTGCTGGCGGGTACATTCTCTTTAATCATTATGACGGGCATGCACTTGTATGGACCGGGTCATC
1698	bglP	AAGCTTTGCTCGAAGAAACTATGGCCTGAAGAAGGAGAAGTTGTTTCGCCTGTTCGTGGAAGCGTTACCACCATTTTTTGTATGGACCGGGTCATC
1699	bglP	AAGCTTTGCTCGAAGAAACTATGGCAGTGCATGAAGGCAGCAGAGAGATCATTCACAGCCCGATTAAGGGAGAAGTGAAAGTGTATGGACCGGGTCATC
1700	bglP	AAGCTTTGCTCGAAGAAACTATGGACCGTTTTACACACGCATCTCTCAAATTGATTGTGGTTCCGACATTCACGCTATTGATGTATGGACCGGGTCATC
1701	bglP	AAGCTTTGCTCGAAGAAACTATGGAATGTGCTGAGTGCGGTCTTTGATGTGATTTCTGGGGTGTTTACCCCTATTCTGCTGTATGGACCGGGTCATC
1702	bglP	AAGCTTTGCTCGAAGAAACTATGCTTTATCGGGCTTCCTGTAACCGCTGCCACTTATTCGTCAACGGTCATCCCGATTTGTATGGACCGGGTCATC
1703	bglP	AAGCTTTGCTCGAAGAAACTATGATTATTTACTGCCGGCTATGTTTTTGGCGAATATGGGGCAGGCGGGAGCATCATTTGTATGGACCGGGTCATC
1704	bglP	AAGCTTTGCTCGAAGAAACTATGATATGACGTCATTACCCCGGTGATTGTGACCAACACAGACCAATATTCGTTTTCGCCTGTATGGACCGGGTCATC
1705	bglP	AAGCTTTGCTCGAAGAAACTATGAGCTGCCTGGAGTGATGGGCACCAATATCAGCGGCGAGCAGTTTCAAATCATTATTGTATGGACCGGGTCATC
1706	bglP	AAGCTTTGCTCGAAGAAACTATGAATACTCATACACATTGGATTGGACACGGTAAAGCTGGAGGGACAATGGTTCACGGCTGTATGGACCGGGTCATC
1707	bglP	AAGCTTTGCTCGAAGAAACTATGAAACGTTCAGCGCGTGATCCACTGCATGACGAGGCTGCGTTTTAATCTTCATGACTGTATGGACCGGGTCATC
1708	bglP	AAGCTTTGCTCGAAGAAACTATGAAAAATTTAAATCACTCGCGCTTACCACAAGCATCACGGCGCTGATGGGGATCACTGTATGGACCGGGTCATC
1709	bglS	AAGCTTTGCTCGAAGAAACTATGTGGATCGTTTTTTGACCCTTTTAACGGCTATAACTCCGGTTTTTGGCAAAAAGCAGATGGTGTATGGACCGGGTCATC
1710	bglS	AAGCTTTGCTCGAAGAAACTATGTGCTGCTTCTTGTCACTGGATTGTTTATGAGTTTGTTTGCAGTCACTGCTACTGCCTCATGTATGGACCGGGTCATC
1711	bglS	AAGCTTTGCTCGAAGAAACTATGTGACTGCGGGGAAAACCGTTCTGTTCAAACATATGGCTATGGACTTTATGAAGTCAGAATGTATGGACCGGGTCATC
1712	bglS	AAGCTTTGCTCGAAGAAACTATGTCGTTCTTCACTTACACAGGTCCAACAGATGGAACTCCTTGGGATGAGATTGATATCGAATGTATGGACCGGGTCATC
1713	bglS	AAGCTTTGCTCGAAGAAACTATGTCGACGGGCAATTAAAACATACTGCAACAAACCAAATTCCGACAACACCTGGAAAGATGTATGGACCGGGTCATC
1714	bglS	AAGCTTTGCTCGAAGAAACTATGCTTGTGGAATGGCACGGGTGTCGATGAATGGCTTGGCTCCTACAATGGTGTAAATTGTATGGACCGGGTCATC
1715	bglS	AAGCTTTGCTCGAAGAAACTATGAACGTATCAATGACGTCATTGGGTGAAATGCGTTTAGCGCTAACAAGCCCAGCTTTGTATGGACCGGGTCATC
1716	bglS	AAGCTTTGCTCGAAGAAACTATGAAACCATGAGAAGATTGTTGATCTCGGGTTTGATGCAGCCAATGCCTATCATACGTATGCTGTATGGACCGGGTCATC
1717	bhlA	AAGCTTTGCTCGAAGAAACTATGTGGAAATGGATATAACACAATATTTAAGTACCCAGGGGCCATTTGCTGTTTTATTTTGTTTGTATGGACCGGGTCATC
1718	bhlA	AAGCTTTGCTCGAAGAAACTATGGAGTCGAAACTTTATAATCAAATCGATTCTCAAAACGAAGTACTGGGTAAATTCAGTGAATGTATGGACCGGGTCATC
1719	bhlB	AAGCTTTGCTCGAAGAAACTATGTGCTCGCAATAGCTTTACTCAATCAAATAATGGTGATGCTGGGTAAAGCAGCATTCATCATGTATGGACCGGGTCATC
1720	bhlB	AAGCTTTGCTCGAAGAAACTATGTCAAAAACAATTACATAACTGCAAAAGGAAAAAAACAAAAACAAGTTCTAAAAAAAGAGATGTATGGACCGGGTCATC
1721	bhlB	AAGCTTTGCTCGAAGAAACTATGGATTGTTTATATACAATTTTCACTATCGTCTTCACAACCAGTACTACTACCGCAGCATGGTGTATGGACCGGGTCATC
1722	bioA	AAGCTTTGCTCGAAGAAACTATGTGCGGTTGCGCTTGAAAATCTGGCATTATTTGAATCTGAAAACATTGTGGAACAAGTAGCTGTATGGACCGGGTCATC
1723	bioA	AAGCTTTGCTCGAAGAAACTATGGAGAATGTCCAGCCTGATCTGATGGCTGCCGGTAAAGGCATTACAGGAGGCTATTTGTATGGACCGGGTCATC
1724	bioA	AAGCTTTGCTCGAAGAAACTATGGAGAAACAAAAATTCATCGCAATGAAAAACGGGTATCACGGTGATACGATTGGCGCTGTATGGACCGGGTCATC
1725	bioA	AAGCTTTGCTCGAAGAAACTATGGAAAAATTGCGCACTCCACGTTATTGGGCATGACCAATGTTCCAGCAACCCAGCTTTGTATGGACCGGGTCATC
1726	bioA	AAGCTTTGCTCGAAGAAACTATGCTTGAGGAACATCATGAGGAAATTGCCGCGCTTTCCATTGAATCAATGGTACAAGTGTATGGACCGGGTCATC
1727	bioA	AAGCTTTGCTCGAAGAAACTATGCGGTTTGGCTTAATGTCCACGGACACCGCAAAAAAGAACTAGATGACGCCATAAAAAAATGTATGGACCGGGTCATC
1728	bioA	AAGCTTTGCTCGAAGAAACTATGCGGAAGGATATTTGGCAGGCGTGCGCGAGCTATGTACAACATACGATGTCTTAATGATTGTATGGACCGGGTCATC
1729	bioA	AAGCTTTGCTCGAAGAAACTATGCAGAGGCGATGGAAATAGCCCTAAAAATGGCGTTTCAGTATTGGAAGAACATCGGGAATGTATGGACCGGGTCATC
1730	bioA	AAGCTTTGCTCGAAGAAACTATGCACGTATACGGCCCGTTGATGTTCGAGAGTTACAAGGCCCCGATTCCTTATGTGTATGTATGGACCGGGTCATC
1731	bioA	AAGCTTTGCTCGAAGAAACTATGAGAGCTTGTACGATCAAAGGAAACTAAAGAACCTTACCCGGCTGATCGGCGGATTGGATATGTATGGACCGGGTCATC
1732	bioA	AAGCTTTGCTCGAAGAAACTATGAAGATTATGATGAAAACCCCTTAATCATCGAAAGCGGGACTGGAATCAAAGTCAAAGACATGTATGGACCGGGTCATC
1733	bioA	AAGCTTTGCTCGAAGAAACTATGAAGATCTGCACGCTCTTCCTCATGTTGGGGATATTCGGCAGCTTGGCTTTATGTGTGTATGGACCGGGTCATC
1734	bioA	AAGCTTTGCTCGAAGAAACTATGAAACATTAATCGACATCAGCCCAAAAAAGCTCACGCGGGTCTTTTATTCAGACAGCGTGTATGGACCGGGTCATC
1735	bioA	AAGCTTTGCTCGAAGAAACTATGAAAAATGAGAGAGTTAGGAATGCTGACAAGACCGCTTGGGGACGTGATTGCATTTCTTCTGTATGGACCGGGTCATC
1736	bioB	AAGCTTTGCTCGAAGAAACTATGTTAGGCTTTGAAGTTGAATCAGTCGAAGAAATGAAGGCTAGTTTAAGTGCGAAAAGCTGATGTATGGACCGGGTCATC
1737	bioB	AAGCTTTGCTCGAAGAAACTATGTGCACGGGGCTTTTCACATCAGAAAACACTTTTACGGAAAAAAAGTAAAGCTCAATATGATGTATGGACCGGGTCATC
1738	bioB	AAGCTTTGCTCGAAGAAACTATGGTCTCCGTGTTCAGGCGCCATTATCGGGATGAAGGAGACGAAACAGGATGTCATTTGTATGGACCGGGTCATC
1739	bioB	AAGCTTTGCTCGAAGAAACTATGGCTGTTCCGTTTTATCAATCCATCAAAAGAAATTCGCATTTCCGGAGGAAGAGAGGTCAATGTATGGACCGGGTCATC
1740	bioB	AAGCTTTGCTCGAAGAAACTATGGCCAAAAGCTTGAAGGCTCTTGACGCGGATTCCATTCCTGTGAATTTTTTGCATGTGTATGGACCGGGTCATC
1741	bioB	AAGCTTTGCTCGAAGAAACTATGCCATTCAAACATCACAACCTCACATACATACGATGACAGAGTCAATACGGTTGAAATCGCTGTATGGACCGGGTCATC
1742	bioB	AAGCTTTGCTCGAAGAAACTATGCATTAGGGCTTTACGCCGCAAACTCCATTTTTGTCGGAGACTACTTAACAACTGCCGGTGTATGGACCGGGTCATC
1743	bioB	AAGCTTTGCTCGAAGAAACTATGATGGCACGCCGTTAGAAGGCGTCAACGAATTAAACCCGCTGTATTGTTTAAAAGTGCTGTATGGACCGGGTCATC
1744	bioB	AAGCTTTGCTCGAAGAAACTATGATGAATCAATGGATGGAACTCGCAGACCGGGTGCTGGCTGGAGCAGAAGTGACTGTGTATGGACCGGGTCATC
1745	bioB	AAGCTTTGCTCGAAGAAACTATGATATCGGCACATATTGTATCGTGGCAAGCGGCAGAGGTCCGTCTAACAGAGAAGTGTGTATGGACCGGGTCATC
1746	bioB	AAGCTTTGCTCGAAGAAACTATGAGACGTATGGACTGAAGATTTGTGCATGTCTTGGACTGTTGAAGCCAGAGCAGGCTGTATGGACCGGGTCATC
1747	bioB	AAGCTTTGCTCGAAGAAACTATGAAACTGCGGCTATTGTTCACAGTCTGCGATTTCGAAAGCGCCGATTGAGTCTTACTGTATGGACCGGGTCATC
1748	bioD	AAGCTTTGCTCGAAGAAACTATGGGGATATCGCGCCATCATCCAGATAGTGATACAAGTTTGCTGAAAGATATGTCGCAGACCTGTATGGACCGGGTCATC
1749	bioD	AAGCTTTGCTCGAAGAAACTATGGAGGGAAAGACTGTCACCATGGAAGAGGTTTTAAGCCATTGGGGGCGGATTAGAGTGTATGGACCGGGTCATC
1750	bioD	AAGCTTTGCTCGAAGAAACTATGGACTATTTGGTCAGTCATGTCATAAAAGCGTTGCAGCTTCCCATGATTATTGTGGCGCTGTATGGACCGGGTCATC
1751	bioD	AAGCTTTGCTCGAAGAAACTATGGAAGATGAAAAAACCAATCCTGAGATGATTGAGCGCTTATGCGGTGTGCCGATTTTTGTATGGACCGGGTCATC
1752	bioD	AAGCTTTGCTCGAAGAAACTATGCTTTCTCATGAAGACATTACGCCTTTTGCCTTCAAGGCGCCGCTTGCACCATACGTTTGTATGGACCGGGTCATC
1753	bioD	AAGCTTTGCTCGAAGAAACTATGCGGTTATATCCAGCGGTCTTGCTGCCTTATTGAAAGACAATAATAGACATGTCGGGGTGTGTATGGACCGGGTCATC
1754	bioD	AAGCTTTGCTCGAAGAAACTATGCCTCGCCTTGGAACCATTAATCATACCTTTTTAACTGTCAAATATGCAGAAAGCATGGGGTGTATGGACCGGGTCATC
1755	bioD	AAGCTTTGCTCGAAGAAACTATGACGCCAAAGCTTGCCAACGTGACGAAAGAAACGGTTCTACATATGGTAAAAGACCATGTATGGACCGGGTCATC
1756	bioF	AAGCTTTGCTCGAAGAAACTATGTTTTGCTGAACCATGCCAGAACATTTATCTTTCAAACCGCTATTCCGCCAGCCAGTGTATGGACCGGGTCATC
1757	bioF	AAGCTTTGCTCGAAGAAACTATGTCTGGTCCTCAAACAATTATTTAGGGCTCGCAAGCGATAGACGTTTGATCGATGCATGTATGGACCGGGTCATC
1758	bioF	AAGCTTTGCTCGAAGAAACTATGGTTATCAGCGCCGTTTTATCGTAACAGACGGAGTATTCAGCATGGATGGCACAATCGTGTATGGACCGGGTCATC
1759	bioF	AAGCTTTGCTCGAAGAAACTATGGGGTGAAAGCCGGATTCGAATTACAATCACGTCTGACCACAGTATGGGTGATATTGATCTGTATGGACCGGGTCATC
1760	bioF	AAGCTTTGCTCGAAGAAACTATGGCTCACGAGGCTTTCAACATCATTGAAGCCAGCAGGGAAAAACGACAGCTTTTATTTTCTTGTATGGACCGGGTCATC
1761	bioF	AAGCTTTGCTCGAAGAAACTATGGAAGATGTCATTTTAAGTGACCAGCTCAATCATGCAAGTATGATCGACGGCTGCCGTGTATGGACCGGGTCATC
1762	bioF	AAGCTTTGCTCGAAGAAACTATGCTTTAAACTGACAGAAGCGGCCCTGCTGTTTTCGAGCGGTTACTTGGCCAATGTCTGTATGGACCGGGTCATC
1763	bioF	AAGCTTTGCTCGAAGAAACTATGCTTAAGCAAAGCTGTTGGCGCGGAAGGAGGTTTTGCGGCAGGATCAGCGGTCTTCTGTATGGACCGGGTCATC
1764	bioF	AAGCTTTGCTCGAAGAAACTATGCTGAAAAACTGCAGGGCAAGGGAATTTATGCTCCTGCCATTCGGCCGCCAACCGTTTGTATGGACCGGGTCATC
1765	bioF	AAGCTTTGCTCGAAGAAACTATGCTCTTGATCAGATCATCTCACTTGCGAAACGCTATCATGCCTTCGTGGTCGTTGATTGTATGGACCGGGTCATC
1766	bioF	AAGCTTTGCTCGAAGAAACTATGCGGTTCACGTTTAACGACAGGCAATTCGGTCTGGCATGAAAAGCTAGAAAAGAAGATTGTGTATGGACCGGGTCATC
1767	bioF	AAGCTTTGCTCGAAGAAACTATGAAGATTGATTCCTGGTTAAACGAGCGGTTAGACAGAATGAAAGAAGCCGGCGTACATCGTGTATGGACCGGGTCATC
1768	bioF	AAGCTTTGCTCGAAGAAACTATGAACAGGAGTTTTGGGCGATTCGGGACAAGGAACGAGTGAATACTTTGGTGTTTGTCTGTATGGACCGGGTCATC
1769	bioF	AAGCTTTGCTCGAAGAAACTATGAAAGGAGATCACACACCGATTATTCCTGTAGTCATTGGCGATGCCCATAAAACGGTCCTATGTATGGACCGGGTCATC
1770	bioI	AAGCTTTGCTCGAAGAAACTATGTAGGTGTACCGGAGGAAGATAGGGAGCAATTAAAGGAGTGGGCTGCGAGTCTCATTCATGTATGGACCGGGTCATC
1771	bioI	AAGCTTTGCTCGAAGAAACTATGGTTTGCTTAGGGTCCTCGCTGGCACGATTAGAAGCGCAAATTGCGATTAACACTCTTGTATGGACCGGGTCATC
1772	bioI	AAGCTTTGCTCGAAGAAACTATGGTTGCGTCAGAGGATATTGACATCTGCGGGGTGACGATCCGTCAAGGAGAACAAGTCTATTGTATGGACCGGGTCATC
1773	bioI	AAGCTTTGCTCGAAGAAACTATGGGTCAATCTCATCAGCAATTCAGTCCTTTGTCTGCTGCAGCATCCAGAACAGCTTTGTATGGACCGGGTCATC
1774	bioI	AAGCTTTGCTCGAAGAAACTATGGCCCAGCCTTAATCTTGCGGATTTTGAATGGCGGTATCGGCCGCTTTTTGGATTTTGTATGGACCGGGTCATC
1775	bioI	AAGCTTTGCTCGAAGAAACTATGGATCTTATTGGTACCGCAGTCGAGGAATGTTTACGCTATGAAAGCCCCACGCAAATGTGTATGGACCGGGTCATC
1776	bioI	AAGCTTTGCTCGAAGAAACTATGCTTTTGTTAGGAGCGGCTAATCGAGACCCTAGCATATTCACGAACCCCGATGTCTTCGTGTATGGACCGGGTCATC
1777	bioI	AAGCTTTGCTCGAAGAAACTATGCGCCGAGAACGACAGAGAGTTATCAGCCGTATATCATTGAAACTGTCCATCATTTGCTTGTGTATGGACCGGGTCATC
1778	bioI	AAGCTTTGCTCGAAGAAACTATGCGACACATTGCGAGCTGTTCATCCTATCTATAAAGGGAGTTTCTTAAAATACCCGGGCTGTGTATGGACCGGGTCATC
1779	bioI	AAGCTTTGCTCGAAGAAACTATGCCGCTCAAGAAAGGCATTAACAGAGGGCAATATTATGGCTGTGCAGGCTATGGCATATGTATGGACCGGGTCATC
1780	bioI	AAGCTTTGCTCGAAGAAACTATGCCACCCTCAACAGGATATGATCAGCATGCTCTTGAAGGGGAGAGAAAAGGATAAGCTGACTGTATGGACCGGGTCATC
1781	bioI	AAGCTTTGCTCGAAGAAACTATGATGTCACAGGATATGAAGAAACGGCTGCTATTTTGAAAGATGCGAGATTCAAAGTCCGCATGTATGGACCGGGTCATC
1782	bioI	AAGCTTTGCTCGAAGAAACTATGAAAATCAAATGATGCTGTTTCAGAACCAGCCTGATCATAGACGATTGCGGACGCTTTGTATGGACCGGGTCATC
1783	bioI	AAGCTTTGCTCGAAGAAACTATGAAAAGATGGAGGTCATTTCGGACTTTGCTTTTCCTTTAGCAAGTTTTGTCATAGCTAACATGTATGGACCGGGTCATC
1784	bioW	AAGCTTTGCTCGAAGAAACTATGTCCCATTCAAGAGGAAAACCTGATTTTATGCAAATTCAATTTGAAGAGGTACATGAATCGTGTATGGACCGGGTCATC
1785	bioW	AAGCTTTGCTCGAAGAAACTATGTACGGGACTGAAGAGGGCTGCCGAGTCTTTTTTATTGATGGATCCAATGATGTAAACACGTGTATGGACCGGGTCATC
1786	bioW	AAGCTTTGCTCGAAGAAACTATGGGACGATCCGGATTACATAACAGGCTATGTTGCGGGTAAGAAAATGGGCTATCAGCGTTGTATGGACCGGGTCATC
1787	bioW	AAGCTTTGCTCGAAGAAACTATGCCGGCGGAGAACGGCTTATTCCTTTCCATGAGATGAAGCATACAGTCAATGCTTTATGTATGGACCGGGTCATC
1788	bioW	AAGCTTTGCTCGAAGAAACTATGCATACATGACCTGGAGAAGCAGCCTATTTTAATAGAGTGGGAGGAAGATCATGACTCATGTGTATGGACCGGGTCATC
1789	bioW	AAGCTTTGCTCGAAGAAACTATGATAGTGTCAGAATGAGGGCTTCAATGAATGGATCTCATGAAGACGGCGGAAAGCATGTATGGACCGGGTCATC
1790	bioW	AAGCTTTGCTCGAAGAAACTATGAATGGTCAGATGTCAGGGGTGCGGTGTTGTTTGATATTCATACAGGCAAGCGAATTGTATGGACCGGGTCATC
1791	bioW	AAGCTTTGCTCGAAGAAACTATGAAGTGAGCTGCCCGGAAGAAGGACAAAAGCTTGCCCGATTGTTATTGGAAAAAGAAGTGTATGGACCGGGTCATC
1792	bioW	AAGCTTTGCTCGAAGAAACTATGAAAAATGGGCGCTTCACAGTCACGTGCCAGCTCATTCAAGAATAAAAGAGGCCCTTGTATGGACCGGGTCATC
1793	birA	AAGCTTTGCTCGAAGAAACTATGTTGAGAAACGGTACCGGGATTATATGACGCACGGATTTACGCCGATTAAGCTTTTATGGGTGTATGGACCGGGTCATC
1794	birA	AAGCTTTGCTCGAAGAAACTATGTGCGGTCAACATTAAGAAAAGACCTTATTGAATTATTTTCTCAGGCCGGCAATGAATGTATGGACCGGGTCATC
1795	birA	AAGCTTTGCTCGAAGAAACTATGGTGCAGGGAATAGAAGAGGCAGCAGGCATCCAAACGGATATTAAATGGCCAAATGTGTATGGACCGGGTCATC
1796	birA	AAGCTTTGCTCGAAGAAACTATGGTGATGCTCTCGGCTGTTCAAGAACTGCTGTGTGGAAGCATATTGAAGAGCTTCGTGTATGGACCGGGTCATC
1797	birA	AAGCTTTGCTCGAAGAAACTATGGGCCAGCATCTTATTTACCATGACGTTCTTTCAAGCACGCAAAAAACGGCTCATGTGTATGGACCGGGTCATC
1798	birA	AAGCTTTGCTCGAAGAAACTATGGACAAACAAACAGCCGGAAGGGGCCGAATGTCTAGGGTATGGCATTCTCAAGAAGTGTATGGACCGGGTCATC
1799	birA	AAGCTTTGCTCGAAGAAACTATGCTGAAGAAGACCGCGTACGTTCAGTGATCATTGGGATCGGCATTAACGTTAACCAGTGTATGGACCGGGTCATC
1800	birA	AAGCTTTGCTCGAAGAAACTATGCGTTAGGTATAGATGATGAAGGCGTTCTGCTTTTAGAAACGAACGAAGGCATTAAAAAAATGTATGGACCGGGTCATC
1801	birA	AAGCTTTGCTCGAAGAAACTATGCGCTCGGTATTGGCACTAATATGAGAGCCAGAACGTTAAACGGAACCTTTTACGGTAAGGTGTATGGACCGGGTCATC
1802	birA	AAGCTTTGCTCGAAGAAACTATGATTTTGCGGCCTGACATTCCGCTCCAAAAAACACCGCAGCTGACTCTGCTTGCTGTGTATGGACCGGGTCATC
1803	birA	AAGCTTTGCTCGAAGAAACTATGAGCCGTTAGAAGAAAAGGATATCGGCTCATCAAAAAACCCGGAAAACTCAGTGAAAGCGATGTATGGACCGGGTCATC
1804	birA	AAGCTTTGCTCGAAGAAACTATGAGATGAATTGAAGGACATCGCGACAAGCCTCAGCCAAGCTGCTGGGGAAAAAATTTGTATGGACCGGGTCATC
1805	bkdAA	AAGCTTTGCTCGAAGAAACTATGTTTGCCGCTGTCCATAAGCTGCCGGTTATTTTCATGTGTGAAAACAACAAATACGCTGTATGGACCGGGTCATC
1806	bkdAA	AAGCTTTGCTCGAAGAAACTATGTTTCGCACTTGACCGTGAAATGGATTATGTATTGCCGTACTACAGAGACATGGGTGTCGTTGTATGGACCGGGTCATC
1807	bkdAA	AAGCTTTGCTCGAAGAAACTATGTTACACCACATTCCAGTGATGACGATGACAGCAGCTACAGAGGCCGTGAAGAAGTTGTATGGACCGGGTCATC
1808	bkdAA	AAGCTTTGCTCGAAGAAACTATGTGGCGTAACTGTGAATGGAAATGATCCGCTGGAAGTTTATCAAGCGGTTAAAGAAGCATGTATGGACCGGGTCATC
1809	bkdAA	AAGCTTTGCTCGAAGAAACTATGGAGAAAAAGGATATCGCAGCCTTTGTTACATTCGGGGAAGGGTCTTCAAACCAAGGCTGTATGGACCGGGTCATC
1810	bkdAA	AAGCTTTGCTCGAAGAAACTATGCTCGCGTTTGGCATGACAGCAAAGGACTTAATGATGTCCGGGTTTGCAAAAGCAGTGTATGGACCGGGTCATC
1811	bkdAA	AAGCTTTGCTCGAAGAAACTATGCGACATCAAGCACTAGGGCTGACTGATCAGGAAGCCGTTGATATGTATAGAACCATGCTGTGTATGGACCGGGTCATC
1812	bkdAA	AAGCTTTGCTCGAAGAAACTATGCCTTACGATAAGCAAGTCGCATGTGAGAACATTTCCGACCGTGCCATAGGCTATGTGTATGGACCGGGTCATC
1813	bkdAA	AAGCTTTGCTCGAAGAAACTATGAAGAAAAACCGCATTGTGACGGGATCATCTCCGGTTACAACGCAAGTGCCGCACGTGTATGGACCGGGTCATC
1814	bkdAA	AAGCTTTGCTCGAAGAAACTATGAACAGGCCTGCTGTCCGATGAGATAGAACAAACCATGCTGGATGAAATTATGGCATGTATGGACCGGGTCATC
1815	bkdAA	AAGCTTTGCTCGAAGAAACTATGAAATGAAGCGACGGATGAAGCGGAGAACGCCCCATATGCAGCTCCTGAGTCAGCGTGTATGGACCGGGTCATC
1816	bkdAA	AAGCTTTGCTCGAAGAAACTATGAAACCGTTCTGGCAAAATTCCATTTGTAATCTCTTGTCAAGGACAGGAAGCAGCACAGGTGTATGGACCGGGTCATC
1817	bkdAB	AAGCTTTGCTCGAAGAAACTATGTGTCATATATTGATGCAATCAATTTGGCGATGAAAGAAGAAATGGAACGAGATTCTCGCGTGTATGGACCGGGTCATC
1818	bkdAB	AAGCTTTGCTCGAAGAAACTATGGTATCGGAGCGGCAATGTACGGAATGAGACCGATTGCTGAAATGCAGTTTGCTGATTGTATGGACCGGGTCATC
1819	bkdAB	AAGCTTTGCTCGAAGAAACTATGGTAAAAAGGGAAGGCGACGACATCACAGTGATCACATACGGCCTGTGTGTCCACTTGTATGGACCGGGTCATC
1820	bkdAB	AAGCTTTGCTCGAAGAAACTATGGAAAAGGCGGTGTGTTTAAAGCGACAGCGGGACTCTATGAACAATTTGGGGAAGAGTGTATGGACCGGGTCATC
1821	bkdAB	AAGCTTTGCTCGAAGAAACTATGCTGCAGAACGTCTCGAAAAAGATGGCATTTCAGCGCATGTGGTGGATTTAAGAACTGTATGGACCGGGTCATC
1822	bkdAB	AAGCTTTGCTCGAAGAAACTATGCGTGCACGGAGCCCTGTATCATTCTCAATCAGTCGAAGCAATTTTCGCCAACCAGTGTATGGACCGGGTCATC
1823	bkdAB	AAGCTTTGCTCGAAGAAACTATGCATACCGTCTGATAAAGGGCGAGGTTCCGGCTGATGATTATGTCCTGCCAATCGGTGTATGGACCGGGTCATC
1824	bkdAB	AAGCTTTGCTCGAAGAAACTATGCAGGTCCTGATATTCCGGCTATGCCTTATGCGCCGACAATGGAAAAATACTTTATGGTCATGTATGGACCGGGTCATC
1825	bkdAB	AAGCTTTGCTCGAAGAAACTATGATTATTTCTGAAGCGGCTAAAATCCGCTACCGCAGCAACAATGACTGGAGCTGTCCTGTATGGACCGGGTCATC
1826	bkdAB	AAGCTTTGCTCGAAGAAACTATGACTGAAAATTGTCATGCCATCAACACCATATGACGCGAAAGGGCTCTTAAAAGCCGTGTATGGACCGGGTCATC
1827	bkdAB	AAGCTTTGCTCGAAGAAACTATGAAAGGTTCTTTTGGTCACAGAAGATACAAAAGAAGGCAGCATCATGAGCGAAGTAGCCGCTGTATGGACCGGGTCATC
1828	bkdB	AAGCTTTGCTCGAAGAAACTATGTTCAATTGCAGTTGCCACAGAGGATTCTTTATTTGTTCCGGTGATTAAAAACGCTGATGATGTATGGACCGGGTCATC
1829	bkdB	AAGCTTTGCTCGAAGAAACTATGTGATGGAAGTCGACGTCACAAATATGGTTGCATATCGCAACAGTATAAAAGATTCTTTTTGTATGGACCGGGTCATC
1830	bkdB	AAGCTTTGCTCGAAGAAACTATGTATCAACTACCCTCAGGCTGCGATTCTTCAAGTAGAATCCATCGTCAAACGCCCGTGTATGGACCGGGTCATC
1831	bkdB	AAGCTTTGCTCGAAGAAACTATGTACTGGTACGATAACAGAGCTTGTGGGAGAAGAAGGCCAAACCCTGCAAGTCGGAGTGTATGGACCGGGTCATC
1832	bkdB	AAGCTTTGCTCGAAGAAACTATGTAAAAAGCGCTACTCGCCAGCTGTTCTCCGTTTGGCCGGAGAGCACGGCATTGACTGTATGGACCGGGTCATC
1833	bkdB	AAGCTTTGCTCGAAGAAACTATGGTGTGCGGACGATTCCTCGGACGAGTGAAACAAATTTTAGAATCGATTGACGAGAAGTGTATGGACCGGGTCATC
1834	bkdB	AAGCTTTGCTCGAAGAAACTATGGAACTGGTGCCGGCGGGCGCATCACACGAAAAGATATTCAGCGCTTAATTGAAACTGTATGGACCGGGTCATC
1835	bkdB	AAGCTTTGCTCGAAGAAACTATGCGGCCTAGCTAAAAAAGTAAGAGACGGAAAACTCACTGCAGATGACATGCAGGGAGGCTGTATGGACCGGGTCATC
1836	bkdB	AAGCTTTGCTCGAAGAAACTATGATGGCATGATTGCTGTCAGAGACATGGTTAATCTGTGCCTGTCATTAGATCACAGAGTGCTGTATGGACCGGGTCATC
1837	bkdB	AAGCTTTGCTCGAAGAAACTATGATATCCTGCGTCTGCAGCCGGTGATAAAGAAATCCCTGTCACAGGTGTAAGAAAAGCATGTATGGACCGGGTCATC
1838	bkdB	AAGCTTTGCTCGAAGAAACTATGAGCATCAGAAGCCGCTGAGAACCCTGTTGCAAAAAGTGCTGGAGCAGCCGATCAGTGTATGGACCGGGTCATC
1839	bkdB	AAGCTTTGCTCGAAGAAACTATGAATTGAACAAATGACGATGCCGCAGCTTGGAGAAAGCGTAACAGAGGGGACGATCTGTATGGACCGGGTCATC
1840	bkdB	AAGCTTTGCTCGAAGAAACTATGAACGTTCTTCGCCTTTTTTGTAAAAGCGGTCGCTCAGGCGTTAAAAGAATTCCCGTGTATGGACCGGGTCATC
1841	bkdB	AAGCTTTGCTCGAAGAAACTATGAACAAATACGATCCGATCGCGGAAGTCATGACAGATAAGGTAAATGCAGAGGTTCCGTCTGTATGGACCGGGTCATC
1842	bkdR	AAGCTTTGCTCGAAGAAACTATGTTGGAGGACATTGAAGCATTGAGCGTCAGACTTATCCAAAAGATCAACCGGGATTACGTGTATGGACCGGGTCATC
1843	bkdR	AAGCTTTGCTCGAAGAAACTATGTCTGAATCCGCATATGGAATGGATTGAAAAAGATCACTTGCCTGTATTCGAACTTGAGCATGTATGGACCGGGTCATC
1844	bkdR	AAGCTTTGCTCGAAGAAACTATGTCAAAGAAAGCATGAAGATACCATTGTCATGCCGGGAAAAATGGCATACATCGTTTTTCATGTATGGACCGGGTCATC
1845	bkdR	AAGCTTTGCTCGAAGAAACTATGGGTGCCGGCAAAAGGGGAACGGCGTTATTACATATTCTGATTAAAACAGCCATCATGTATGGACCGGGTCATC
1846	bkdR	AAGCTTTGCTCGAAGAAACTATGGGTGAGCTGACACAAAATATGCAGGCCAAATTGCTACGCGTCCTTCAAGAAAAGGTGTATGGACCGGGTCATC
1847	bkdR	AAGCTTTGCTCGAAGAAACTATGGGAACATTCCGGGAAGACCTGTATTACCGGATCAATCGCTATCCGATCTCCATCCTGTATGGACCGGGTCATC
1848	bkdR	AAGCTTTGCTCGAAGAAACTATGGCCGGGATTGAAAGAAGCAGAACAGTATGGGATTGCCGTATCATCTGATTGGAAATGTATGGACCGGGTCATC
1849	bkdR	AAGCTTTGCTCGAAGAAACTATGGCAAACACTGATATTTCCGAAGGCGAAAGCATGCATTTAAAGGTGCTTGAAACAAGACGTGTATGGACCGGGTCATC
1850	bkdR	AAGCTTTGCTCGAAGAAACTATGGAAAACCTGCTCGAATCAGAATTGTTCGGCTATGAGGATGGTGCGTTTTCAGGAGTGTATGGACCGGGTCATC
1851	bkdR	AAGCTTTGCTCGAAGAAACTATGCTGGCAGAGGAAGTGACCAACTTAAAGCAGGTCCGTACGATGCTGGAGGCAATTATTTGTATGGACCGGGTCATC
1852	bkdR	AAGCTTTGCTCGAAGAAACTATGCGCCCATGCCATCCATAACGAAAGTGACCGGAAATACAATAAATTTATTCGCGTGAATGTATGGACCGGGTCATC
1853	bkdR	AAGCTTTGCTCGAAGAAACTATGCAGACAAATTATTCGCACGCTTGAAGCGAAATACACGTTTGACGACATTATCGGCAAAATGTATGGACCGGGTCATC
1854	bkdR	AAGCTTTGCTCGAAGAAACTATGATGAAAACGGCATCGGCCTGCTAATCAATAAAGCGTATACGAAAATGACGGGGCTTTTGTATGGACCGGGTCATC
1855	bkdR	AAGCTTTGCTCGAAGAAACTATGAGAAGTGATCGTTAATGTAGCACCGGTGATTGTGGACGGGATTTTGAAAGGCAGCTGTATGGACCGGGTCATC
1856	bkdR	AAGCTTTGCTCGAAGAAACTATGAAAACGTGAGGAAGTCATTGGGCGCCCAATAAAAGAAGTGATTCCGAGCACTAAGATGTGTATGGACCGGGTCATC
1857	blt	AAGCTTTGCTCGAAGAAACTATGTTTCTTCGCCTCCGCCATCGCGTTAATAGCAGCTGTCACTTCCGTTTTTATACTAAAAGATGTATGGACCGGGTCATC
1858	blt	AAGCTTTGCTCGAAGAAACTATGTGCTTGTAACTTGTTTTATTTTTCTGGCGTTCGATTTGCTACGTCCGGCCTTAACCGCTGTATGGACCGGGTCATC
1859	blt	AAGCTTTGCTCGAAGAAACTATGTGCCATTTCTCAGTTAATTACTTCACCTTTTGCAGGTAGGTGGGTTGACCGTTTCGGGTGTATGGACCGGGTCATC
1860	blt	AAGCTTTGCTCGAAGAAACTATGTCCTTTTTGCAGGTTTCGTTATGATTGTCGGCCTTGGTCTTACAATGGTTTGGAAAGAAATGTATGGACCGGGTCATC
1861	blt	AAGCTTTGCTCGAAGAAACTATGTCATTGTCGATAGAAGAACGCCATCAACTCTCATCTCATACAAAGGAATCAAATTTCATGTATGGACCGGGTCATC
1862	blt	AAGCTTTGCTCGAAGAAACTATGTATTTCTCGAGGATATTGGGTGGTGTAAGTGCGGCTTTTATCATGCCCGCGGTAACTGTATGGACCGGGTCATC
1863	blt	AAGCTTTGCTCGAAGAAACTATGGTATCGGTTTAATCATTCCAGTTATGCCTTCTTTTATGAAAATCATGCATTTATCCGGCATGTATGGACCGGGTCATC
1864	blt	AAGCTTTGCTCGAAGAAACTATGGCTGATATTACAACCCTAAAGGAAAGGTCAAAGGCTATGGGGTATGTTTCTGCTGCAATGTATGGACCGGGTCATC
1865	blt	AAGCTTTGCTCGAAGAAACTATGGAGATCCATTCATCCTGTCTATTTCATTGCATTTATTATCGTCTTTGTAATGGCTTTTGGTGTATGGACCGGGTCATC
1866	blt	AAGCTTTGCTCGAAGAAACTATGCTTTATTATTGGACCTGGTGCGGGAGGATTTATTGCCGGCTTTGGTATCCGCATGTGTATGGACCGGGTCATC
1867	blt	AAGCTTTGCTCGAAGAAACTATGCTTGGAGAGAAAAGAATGATTCAGCTGTGCTTAATAACCGGTGCGATCTTGGCTTTCGTGTGTATGGACCGGGTCATC
1868	blt	AAGCTTTGCTCGAAGAAACTATGCGATTAGTTCCATTGTTGCGGTAGTTATTCAAGTTTTACTATTCGGGAAATTGGTCAACATGTATGGACCGGGTCATC
1869	blt	AAGCTTTGCTCGAAGAAACTATGCAGCCTGGGAAATATATTTGGACCTGCTCTAGGCGGTATACTATTTGATCTTAACATTCATGTATGGACCGGGTCATC
1870	blt	AAGCTTTGCTCGAAGAAACTATGATTTATCCAATATGGCCGGTAACCAGCAGGGTTTCGTAGCAGGCATGAACTCCACATATGTATGGACCGGGTCATC
1871	bltD	AAGCTTTGCTCGAAGAAACTATGTGTCGGGCTTTACTATGAAGGAGATCTAGTCGGTTTTGCAATGTATGGATTGTTTCCCGATGTATGGACCGGGTCATC
1872	bltD	AAGCTTTGCTCGAAGAAACTATGATATATTGAATCTACAAAAGTATGTTTAGAAGATGCAAAAGAATGTCACTATTATAAACCTGTATGGACCGGGTCATC
1873	bltD	AAGCTTTGCTCGAAGAAACTATGACGCCTTTATCAAAGGTTTGGTTTTCAATTTAATGGTGAACTCGACTTTAATGGTGAGAATGTATGGACCGGGTCATC
1874	bltD	AAGCTTTGCTCGAAGAAACTATGAAGAAAATGCTTAAAGCCCTCATTCAGCACCTTGCTGAGTTATATAAATGCAAGAGAATGTATGGACCGGGTCATC
1875	bltD	AAGCTTTGCTCGAAGAAACTATGAAAGCAGTAACTGATGATAATCGTGCTGCAATTCTTGATCTACATGTCAGCCAGAATCAATGTATGGACCGGGTCATC
1876	bltD	AAGCTTTGCTCGAAGAAACTATGAAAACGGACGAGTCTGGCTTGACCGATTTTTTATTGACGAACGCTATCAGGGAAAAGGATTGTATGGACCGGGTCATC
1877	bltR	AAGCTTTGCTCGAAGAAACTATGTTTCATTATGATGAGATTGGTCTTTTCTCGCCGGAAATAAAAAAAGAAAATGGGTTGTATGGACCGGGTCATC
1878	bltR	AAGCTTTGCTCGAAGAAACTATGTGGTAGTTGACGGGTATGAAAATACATATGCAAAAATCCTCCTTCAAGTTAAAGAGGTGTTGTATGGACCGGGTCATC
1879	bltR	AAGCTTTGCTCGAAGAAACTATGTGAGCGAAGATGTTAAGAAGTATTTCACAACAGGGGAGTTTTCGAAGCTCTGCCGTGTGTATGGACCGGGTCATC
1880	bltR	AAGCTTTGCTCGAAGAAACTATGTCCTATCATCAATTTGAGACTTTTCAAGTCATCAGTCTATTTAAAGAGCTTGGGGTTCCATGTATGGACCGGGTCATC
1881	bltR	AAGCTTTGCTCGAAGAAACTATGTCATTGAAAGAAATGGAATGCAAATAGGGGAAAATGCATATGAGGAATATATGCTGGATGTGTATGGACCGGGTCATC
1882	bltR	AAGCTTTGCTCGAAGAAACTATGTCAGCAATATGAATTAGATGAAGGATATCCGATAGGCGGAATCTTTGCACGGGAACAAATGTATGGACCGGGTCATC
1883	bltR	AAGCTTTGCTCGAAGAAACTATGGCCTGTATGCAGTTGGATATGAAATAGGCGGAAATACTGAAGAGGCGTACCGGAGAATCATGTATGGACCGGGTCATC
1884	bltR	AAGCTTTGCTCGAAGAAACTATGGCCGAAAAACATTAAACTTACCAGAACGAAAATATGTGGCAGCCATTTCAGAACTCATTCTGTATGGACCGGGTCATC
1885	bltR	AAGCTTTGCTCGAAGAAACTATGAGCAGTTGCAAACGATCTTACAAACAAAAGTGACGCTTACAGAACAAGCACTTGAGACTGTGTATGGACCGGGTCATC
1886	bltR	AAGCTTTGCTCGAAGAAACTATGACTTTTATATAAAAGTAAAAGATGGGGCAGAGAACATAAATTATCATGTACGGCCAAAAGTGTATGGACCGGGTCATC
1887	bltR	AAGCTTTGCTCGAAGAAACTATGAAAAGGAAAAACACCAGACAAGATCCTGCATGTTCTAAAAGAAAAGTCTATTGAGATTGATGTATGGACCGGGTCATC
1888	blyA	AAGCTTTGCTCGAAGAAACTATGTTGACGGACTTCGCTTCTATTCAAAACCATCTTGGGAAGATAAAGATGTTGTCGGCACATGTATGGACCGGGTCATC
1889	blyA	AAGCTTTGCTCGAAGAAACTATGTTCAAAAGCTTCTCCAACTAAACCAACAACCTCCTCCCCTTCCTCTTCATCAGCATGTATGGACCGGGTCATC
1890	blyA	AAGCTTTGCTCGAAGAAACTATGTGCACAAGTTTATGCATCAGCTCACATTTTCGTAGATAAGGCTGAAGCAATTTGTATCATGTATGGACCGGGTCATC
1891	blyA	AAGCTTTGCTCGAAGAAACTATGTCAAGCGCTGCAATCGTAATGGACAAGCCTGATCGAAATAGTTCTAAAAATATTGGCACATGTATGGACCGGGTCATC
1892	blyA	AAGCTTTGCTCGAAGAAACTATGGTTCGTCATTATGACATCACCCATAAGAATTGCCCTGCACCATGGGTATCTAACAGCCATGTATGGACCGGGTCATC
1893	blyA	AAGCTTTGCTCGAAGAAACTATGGGCATCGGATTTCCTACAGTTGTAGAGAAAGTTAAAGTTGGATCTGCCTATCAATACAAATGTATGGACCGGGTCATC
1894	blyA	AAGCTTTGCTCGAAGAAACTATGGACGGTTCATTCCATTCAGATACAGTTGAAAGAACTGAGGATGTGTTCGTTGAATTATGTTGTATGGACCGGGTCATC
1895	blyA	AAGCTTTGCTCGAAGAAACTATGGAAGCACTATTTCAATTTCTGGTTCAGTTAAAGGTAAAAACAATTCCAATGGCTACTGGGTGTATGGACCGGGTCATC
1896	blyA	AAGCTTTGCTCGAAGAAACTATGCTGCTTCTGACAAATATGTTGATGTTACAGGATCAGTTAAAACCTCTTCCTCTGCCCCAATGTATGGACCGGGTCATC
1897	blyA	AAGCTTTGCTCGAAGAAACTATGCGTCCTACACTATACAGCCAATCCGGGTGCAGGTGCAGACAATCATCGAAGATACTTCTGTATGGACCGGGTCATC
1898	blyA	AAGCTTTGCTCGAAGAAACTATGCATCAACTTCTTCAAGTTCCTCATCTATTAAATCCGTAGGAAAAATCAAAATTGTCGGTGTGTATGGACCGGGTCATC
1899	blyA	AAGCTTTGCTCGAAGAAACTATGCAAAGAGATAGTGCCGGAAATCCTTATCGAGGAGTTGCTGCGCTGAAACCTAACGCTTGTATGGACCGGGTCATC
1900	blyA	AAGCTTTGCTCGAAGAAACTATGAGCTACATTCCAGTCAATAAGTATACTAGACCAGGTTTGAAATTACAGGGTGTGAAAAAATGTATGGACCGGGTCATC
1901	blyA	AAGCTTTGCTCGAAGAAACTATGAAGTTATTTATAAAGGTAAACGTGGATATATCTCGGGACAGTTTGGATCAACAATCTAATGTATGGACCGGGTCATC
1902	bmr	AAGCTTTGCTCGAAGAAACTATGTCGGCGGAATGCTGTTCGATATAGATGTAAACTATCCTTTCTACTTTGCAACGGTCACCTGTATGGACCGGGTCATC
1903	bmr	AAGCTTTGCTCGAAGAAACTATGTCATTATGCCCGGGGTCACGGCTTTTATTGCAGATATCACGACCATTAAAACACGTGTATGGACCGGGTCATC
1904	bmr	AAGCTTTGCTCGAAGAAACTATGTAGCCATAGGGATTGCACTGACCATTGCTTGGAAAGCGCCTGCACATCTTAAAGCTGTATGGACCGGGTCATC
1905	bmr	AAGCTTTGCTCGAAGAAACTATGTACGCAAGTCGTCTTATTCGACCGCTTCACAAGATGGTTTGGCGAAATTCATTTAATTCGTGTATGGACCGGGTCATC
1906	bmr	AAGCTTTGCTCGAAGAAACTATGGCGAGCCGGAACGAAACCCTGAAAATCAGGAAATAAAAGGACAGAAGACAGGCTTTTGTATGGACCGGGTCATC
1907	bmr	AAGCTTTGCTCGAAGAAACTATGGATCGGGCTTGTGATTCCAGTAACGCCGACCATTATGAATGAATTGCATTTATCGGTGTATGGACCGGGTCATC
1908	bmr	AAGCTTTGCTCGAAGAAACTATGCTGCTTCGCTATTACACAGCTCATTGTCTCACCAATAGCCGGACGATGGGTTGATTGTATGGACCGGGTCATC
1909	bmr	AAGCTTTGCTCGAAGAAACTATGCTATTTCAACAGGATTTATTATCGGCCCCGGCATCGGGGGATTTTTAGCAGAAGTCCTGTATGGACCGGGTCATC
1910	bmr	AAGCTTTGCTCGAAGAAACTATGCGCAAGATCATGATCGTAATCGGCCTGTTGTTCTTTAGTGTGTCGGAGTTTTTGTTCGTGTATGGACCGGGTCATC
1911	bmr	AAGCTTTGCTCGAAGAAACTATGCGACGAGTCTGGTATTCTTGCTGACAACGGTACATTCATATGTTGCGATTCTGCTGGTGTATGGACCGGGTCATC
1912	bmr	AAGCTTTGCTCGAAGAAACTATGCAGTCACCGTATTTGTCGGATTTGATCTCATGCGGCCTGCGGTAACGACTTACCTTGTATGGACCGGGTCATC
1913	bmr	AAGCTTTGCTCGAAGAAACTATGATTGGAAAAACAGTTGAGATGTTATTTATCTCCCGTATGCTGGGCGGTATCAGCGCAGCTGTATGGACCGGGTCATC
1914	bmr	AAGCTTTGCTCGAAGAAACTATGATTGCGGGAAATGAACAGGGGTTTGCCGGCGGTATGAATTCAATGTTTACAAGTATCTGTATGGACCGGGTCATC
1915	bmr	AAGCTTTGCTCGAAGAAACTATGATTCGGATTTACGGCCAGCGACATTGCCATTATGATTACAGGAGGAGCGATTGTTTGTATGGACCGGGTCATC
1916	bmrA	AAGCTTTGCTCGAAGAAACTATGTTGTTTATTATGAACTGGAAGCTGACACTGCTTGTGTTAGTGGTCGTTCCGCTGGCCTGTATGGACCGGGTCATC
1917	bmrA	AAGCTTTGCTCGAAGAAACTATGTTGCCTTAGTAAGACGGACCAATCCTTCTTATGGAAAGCTCGCCTTTGCGCTTGCTGTATGGACCGGGTCATC
1918	bmrA	AAGCTTTGCTCGAAGAAACTATGTTACTCGCTTGAATCGTGGAGGGAGCATATCGGGTATGTATCACAGGAAAGCCCGTTAATTGTATGGACCGGGTCATC
1919	bmrA	AAGCTTTGCTCGAAGAAACTATGTCCGTAACCCAAGCATTCTTATGCTCGATGAAGCTACCTCAAGTCTCGACAGCCAATGTATGGACCGGGTCATC
1920	bmrA	AAGCTTTGCTCGAAGAAACTATGGATGGAGGGCCGCACAACGATTGTTATCGCTCACCGCCTATCTACCGTTGTAGATTGTATGGACCGGGTCATC
1921	bmrA	AAGCTTTGCTCGAAGAAACTATGGAAATTACCGGTCGTGGAACACACCATGAGTTAATGGCTTCCCATGGCCTTTACCTGTATGGACCGGGTCATC
1922	bmrA	AAGCTTTGCTCGAAGAAACTATGCGGGACAATCAGAGAAAATATTTGCTACGGGTTAGAACGAGATGTGACGGATGCTGAGATGTATGGACCGGGTCATC
1923	bmrA	AAGCTTTGCTCGAAGAAACTATGCCAGATTACAACGTTTTTCACACAGCTGCAAAAATCAATCGGTGCAACAGAACGAATGTGTATGGACCGGGTCATC
1924	bmrA	AAGCTTTGCTCGAAGAAACTATGCAGTCAGCCGTGTAACGAACGATACGATGGTGGTCAAAGAATTGATTACAACCCATATCATGTATGGACCGGGTCATC
1925	bmrA	AAGCTTTGCTCGAAGAAACTATGCAGGTCTCATCAGGCGAGCTCACAGCCGGAGCGCTCGTGGCTTTTATTTTATATTTGTATGGACCGGGTCATC
1926	bmrA	AAGCTTTGCTCGAAGAAACTATGCAGCTTGTCGATGGTTTTTCTATGTCAAATCTGTCAGGCACGCAAATCGGTTTGATGTATGGACCGGGTCATC
1927	bmrA	AAGCTTTGCTCGAAGAAACTATGATGCACATCTGCCTATCCAGCTTGATCGCGTGTCTTTTGGATATAAGCCTGATCAGCTTGTATGGACCGGGTCATC
1928	bmrA	AAGCTTTGCTCGAAGAAACTATGAGGATGTCGAATATGGGCGCGGGAAGATGGGGATTTCCTCATTATTTAAGCTTGGTGTATGGACCGGGTCATC
1929	bmrA	AAGCTTTGCTCGAAGAAACTATGAAACGCAAGATGAAACGGCTCGTTTTACAGGCCTGCTTAATCAAATTCTCCCGGAAATTGTATGGACCGGGTCATC
1930	bmrA	AAGCTTTGCTCGAAGAAACTATGAAACGACGCTGTTTAAGCTGCTTGAACGCTTTTATTCTCCGACTGCAGGGACCATTGTATGGACCGGGTCATC
1931	bmrC	AAGCTTTGCTCGAAGAAACTATGTTGTATTCCGGAACGAGCTGACGCTTGGAGAGTTAGTGTCCTTTAACGTTTATCTCGGCATGTATGGACCGGGTCATC
1932	bmrC	AAGCTTTGCTCGAAGAAACTATGTGTATATCATGTCTTATTTTTGGATGCATCAGCTGTTTGGCGGAGCGAATCTGATGGAGATGTATGGACCGGGTCATC
1933	bmrC	AAGCTTTGCTCGAAGAAACTATGTATGAAACGGATGTGACAGATCCAAAACAGCCCGCTGATCTTAAAGAGCCTGGAGATGTATGGACCGGGTCATC
1934	bmrC	AAGCTTTGCTCGAAGAAACTATGGCTTTTATTGATTCACTGTTTGAGCCGACGGTAAAACTGCTTGTCGGCGCAAGCTATTGTATGGACCGGGTCATC
1935	bmrC	AAGCTTTGCTCGAAGAAACTATGGACATTTATTTTGACACACCGATTATCCGCGGTAGAGCACGCTGACCTGATCCTTGTTGTATGGACCGGGTCATC
1936	bmrC	AAGCTTTGCTCGAAGAAACTATGGAAAGCAGGGGCATTTACTGCGGAAGGGCTGCTGTTTTATATCGGTATCTTTTTTGTGCTGTATGGACCGGGTCATC
1937	bmrC	AAGCTTTGCTCGAAGAAACTATGCTATATGGAAGTAAAATTCATGAGCGGTTTACTGAGGCCCAAAACGCGTTCGGGGCTGTATGGACCGGGTCATC
1938	bmrC	AAGCTTTGCTCGAAGAAACTATGCGGAAATCTTGATTCTGGATGATTCACTTTCCGCTGTAGATGCCAAAACAGAGGCTGTGTATGGACCGGGTCATC
1939	bmrC	AAGCTTTGCTCGAAGAAACTATGCAGTTTTGAAAAAGCTTGGCTGGTTTTTTAAGGCGTACTGGCTGCGCTATACGATTGCGTGTATGGACCGGGTCATC
1940	bmrC	AAGCTTTGCTCGAAGAAACTATGATTTAATGGCACGAGGGACAAATGATCTTCAGGCCGTCAGTTTAACCACAGGGTTTGTGTATGGACCGGGTCATC
1941	bmrC	AAGCTTTGCTCGAAGAAACTATGATTAGCAGTCAATGTCATTGAAATGTTTCCGCCTAAGCTCTTGGGGAACGCCATAGATGATGTATGGACCGGGTCATC
1942	bmrC	AAGCTTTGCTCGAAGAAACTATGACGCATCAAGAACTGCTGGCCAATAATGGGTGGTACCGGGAACAATATGAAAGACTGTATGGACCGGGTCATC
1943	bmrC	AAGCTTTGCTCGAAGAAACTATGAATTCTTCGTACGAAGCTGATGGGGCATTTGCTGACTATGTCGCCGCCGTTTTATTGTATGGACCGGGTCATC
1944	bmrC	AAGCTTTGCTCGAAGAAACTATGAAGCACATTTTGAAAAAGATTTGCACATGCTTCCGTCCGGTCTGGAGACAATGGTTGTATGGACCGGGTCATC
1945	bmrC	AAGCTTTGCTCGAAGAAACTATGAACGATGTTCGCCGGTTTAATGAAATGACCGCTGATGTTTATCAGAAAAATATGAAAGTGTGTATGGACCGGGTCATC
1946	bmrD	AAGCTTTGCTCGAAGAAACTATGTCTTTATCGAAAATTGCTGATCACAGCCGTCCTTTTGCTAACTGTTGCCGTCGGTTGTATGGACCGGGTCATC
1947	bmrD	AAGCTTTGCTCGAAGAAACTATGTAGCGCTCGTCGGCCATACCGGATCAGGAAAAAGCTCGATTTTGAATCTTCTGTTTGTATGGACCGGGTCATC
1948	bmrD	AAGCTTTGCTCGAAGAAACTATGGTGTTTTTGAACTGCTTGAAGAAAAGAATACGGAAGAAGCGGGTGAACCGGCGAAGTGTATGGACCGGGTCATC
1949	bmrD	AAGCTTTGCTCGAAGAAACTATGGGGGCGGGTTGAATTTCGTGATGTGTCATTTGCGTATCAAGAAGGTGAAGAGGTATTGTATGGACCGGGTCATC
1950	bmrD	AAGCTTTGCTCGAAGAAACTATGGGCCGGAAAAGTCGTTGCGCGGATTACCAATGATACGGAGGCTATTAGGGATTTATATGTGTATGGACCGGGTCATC
1951	bmrD	AAGCTTTGCTCGAAGAAACTATGGGCATGACCATTATTCAGGCTTTCCGCCATCAAAAGGAAACAATGAGAGAATTTGAGGTGTATGGACCGGGTCATC
1952	bmrD	AAGCTTTGCTCGAAGAAACTATGCTTGCGTTTGTATGTCTGGCAATTGTGCCGATTATCTGGCTGTGGTCGGTCATATACTGTATGGACCGGGTCATC
1953	bmrD	AAGCTTTGCTCGAAGAAACTATGCGGGGATTGTTTCTATCGGTGTGCTGTACGCGTTTGTCGATTATTTGAACCGGTTATTTTGTATGGACCGGGTCATC
1954	bmrD	AAGCTTTGCTCGAAGAAACTATGCGGCAGTTAATTTCTTTCGCTAGAGCTTTGGCGTTTGATCCCGCGATCTTGATTTTTGTATGGACCGGGTCATC
1955	bmrD	AAGCTTTGCTCGAAGAAACTATGCCTTAATGTCCCATAATCTGGTCAATGTCATCCGCAATCTTGCGTTCGTCTGTCTGTGTATGGACCGGGTCATC
1956	bmrD	AAGCTTTGCTCGAAGAAACTATGCCGGGCATATGCTGCCGAAAAGCTGACTAAGCAGGAACTTTTCCAGTTCTATCAGCTGTATGGACCGGGTCATC
1957	bmrD	AAGCTTTGCTCGAAGAAACTATGCATTTACAACATGTCAAGACAGGAACTCAGATCCCATATGGGTATTGTGCTTCAGGACCCTGTATGGACCGGGTCATC
1958	bmrD	AAGCTTTGCTCGAAGAAACTATGAGGGAATGGTGTTACTGATCTGCCTGTATGGGGGCTTGCTTGTGTTTTCGGTATTCTTTCTGTATGGACCGGGTCATC
1959	bmrD	AAGCTTTGCTCGAAGAAACTATGAATCGGATTATTCAAAAGATGAGGCAGGACGTGTTTTCGCACATACAGAAAATGCCGATGTATGGACCGGGTCATC
1960	bmrD	AAGCTTTGCTCGAAGAAACTATGAAGTGGGAATGGCGTTCTATTTTGTTGATCAGGCTGTCAGCTTCGACGGGAATAGATGTATGGACCGGGTCATC
1961	bmrR	AAGCTTTGCTCGAAGAAACTATGTTACGCCGGATATGGAAATCACAACGATCCCTAAAGGGAGGTATGCGTGTATCGCTGTATGGACCGGGTCATC
1962	bmrR	AAGCTTTGCTCGAAGAAACTATGTCGCGGACCGCCAATTAACAGTTGTCAGTGATGTATACGAGTTAATCATACCGATTCATGTATGGACCGGGTCATC
1963	bmrR	AAGCTTTGCTCGAAGAAACTATGTCGAGTCAGCAGATGGATTTACGAACAATAGCTACGGCGCTACTTTCTCTTTTCAGCCCTGTATGGACCGGGTCATC
1964	bmrR	AAGCTTTGCTCGAAGAAACTATGCGGCACACCTTTAGAAGAGATGAAAAAAGCACAGGACTTAGAGATGGAAGAACTGTTTGCTGTATGGACCGGGTCATC
1965	bmrR	AAGCTTTGCTCGAAGAAACTATGCAGCATTGATGAAATGACTTACCGTCATATTTTCACACCTGTATTGACGAATAAACAGATGTATGGACCGGGTCATC
1966	bmrR	AAGCTTTGCTCGAAGAAACTATGCAGAGCAGGAGAGGCAAATCAGGGAGAAATTAGACTTTTTATCAGCCCTGGAGCAAACCATGTATGGACCGGGTCATC
1967	bmrR	AAGCTTTGCTCGAAGAAACTATGCAGAAGGAATCGGGCCTGAAAACGTGCTCAACGCCTCCTACAGCAAATTAAAAAAATGTATGGACCGGGTCATC
1968	bmrR	AAGCTTTGCTCGAAGAAACTATGATGAAGGAATCGTATTACTCAATTGGGGAAGTATCAAAACTGGCAAACGTGTCGATGTATGGACCGGGTCATC
1969	bmrR	AAGCTTTGCTCGAAGAAACTATGATGAAACGGCAGATGGAATATCCCGCGCTCGGTGAGGTGTTTGTTTTAGATGAAGTGTATGGACCGGGTCATC
1970	bmrR	AAGCTTTGCTCGAAGAAACTATGACTCCCCGAAAAAACAAGAAGAATATCGAGTCGAAATGAAAATACGGATCGCTGAATGTATGGACCGGGTCATC
1971	bmrR	AAGCTTTGCTCGAAGAAACTATGACCAGCCTACGTCGACCCGGATACCAGCTACCGCTATTATACAGATTCTCAGCTCATTCATGTATGGACCGGGTCATC
1972	bmrU	AAGCTTTGCTCGAAGAAACTATGTTTATACACATACACCCGCAGTCATTCAGGTCCTGCCACAGCATATCGACATGCTTTGTATGGACCGGGTCATC
1973	bmrU	AAGCTTTGCTCGAAGAAACTATGTTATGCTGCTTGTGATGAATGGCCAATACATTGGAACGAATCGAATTCCTCTGCCTGTATGGACCGGGTCATC
1974	bmrU	AAGCTTTGCTCGAAGAAACTATGTATTGAAGACGGCTTACTTGATGTTCTCATATGCCGCAATACCAACCTCACCGCGTGTATGGACCGGGTCATC
1975	bmrU	AAGCTTTGCTCGAAGAAACTATGGGGAAAAATCAGCTATTTTACAAGTGCCTTGCGAACCGTCTCATCTGCTGCATCGTTGTATGGACCGGGTCATC
1976	bmrU	AAGCTTTGCTCGAAGAAACTATGGGCACGATCCATCAATGCATAAATGCTATCAGCGCTCTAGAAAGAAAACCCGCTGTGTATGGACCGGGTCATC
1977	bmrU	AAGCTTTGCTCGAAGAAACTATGGAATTTCTGGGGGATCGGCTTAATTGCAGAAACGTCGAATCAAATCAACGAAACGTGTATGGACCGGGTCATC
1978	bmrU	AAGCTTTGCTCGAAGAAACTATGAGAAAAAGCACTTGGTGCTGTGGTGCCGGTTTTATCTCACCATTTAGATGAGGTGATGTATGGACCGGGTCATC
1979	bmrU	AAGCTTTGCTCGAAGAAACTATGACTTTTCAAGAGTGCTTGGCATCCCTCAAAATCTTGCAAAGGCCGCGGAAGCACTTATTGTATGGACCGGGTCATC
1980	bmrU	AAGCTTTGCTCGAAGAAACTATGAAGGCTCAATTGATCGTTTTACTGGAGAGTTGTCCTATGTCCAGGCTTCCCGTATCGAGATGTATGGACCGGGTCATC
1981	bmrU	AAGCTTTGCTCGAAGAAACTATGAAGGATGATGCGTATCATTTTTGCCGATCCATTGATGATTCTGTCGACACCGTCTTGTATGGACCGGGTCATC
1982	bofA	AAGCTTTGCTCGAAGAAACTATGGGCAGTCTTGGCATTCATGTGCCGATTAATCTGGTTACAACAGCTATCAGCGGAATTTTTGTATGGACCGGGTCATC
1983	bofA	AAGCTTTGCTCGAAGAAACTATGATTCTTCTTTTTTTATCAGGTTCAGCAGCGAAGCCTTTAAAGTGGATTGGCATCACAGCTGTATGGACCGGGTCATC
1984	bofC	AAGCTTTGCTCGAAGAAACTATGGGACGATATTTCTCCGCTCAGCAAGGTCAACGGGTATATCGGTGTATCGGATAATGGATGTATGGACCGGGTCATC
1985	bofC	AAGCTTTGCTCGAAGAAACTATGGCTTGAAAAGGTGTATTTGGACGGCGATGTCAGCATTGAGCATAAGCATGAAAAAGTGTTTGTATGGACCGGGTCATC
1986	bofC	AAGCTTTGCTCGAAGAAACTATGGCGGCCTGAGCCAGCTTCCGAACCAATTCAGTCTTTTTTTCAAATTGATTTAGAAAGGCTTGTATGGACCGGGTCATC
1987	bofC	AAGCTTTGCTCGAAGAAACTATGGCAGCTTATGCCGGATGGACGCTAGTGGAACAAAAAAAGGGATATGTGCTCTTCCTGTATGGACCGGGTCATC
1988	bofC	AAGCTTTGCTCGAAGAAACTATGCACGGCGTATCTTTTGCTGGGCATTCTTTGCTCAGCGGCAGTATTTTTAATAGGAGCTTGTATGGACCGGGTCATC
1989	bofC	AAGCTTTGCTCGAAGAAACTATGAAAAATCTGCTGAAAGGCATTCCATTTCGGACAAAAGCGGAGTTTGAGGATGTCATCTGTATGGACCGGGTCATC
1990	bpr	AAGCTTTGCTCGAAGAAACTATGTCGTCTGACGTATACGATGTAACAGTGAAACCAAGCATCACGGCGGGATATAAGCAGGTGTATGGACCGGGTCATC
1991	bpr	AAGCTTTGCTCGAAGAAACTATGTCCTGATGTTGTCAATAACTCATGGGGAGGGGGCTCTGGACTTGATGAATGGTACTGTATGGACCGGGTCATC
1992	bpr	AAGCTTTGCTCGAAGAAACTATGTAACGGCTAAACGAATCAGCGGTGATCATCTAAAAGGAACGTATCAGGCAGAGATCCCATGTATGGACCGGGTCATC
1993	bpr	AAGCTTTGCTCGAAGAAACTATGTAAAACGACAGGAGAGCCGGTAACAGGCGCTTCCGTTTATGTTGTAGAGGATGCTGTGTATGGACCGGGTCATC
1994	bpr	AAGCTTTGCTCGAAGAAACTATGGTATATAGATGGAAAGTGGCAGCCAGGTGACAAAGCGGATGGCAACTATATGATTCGCGTGTATGGACCGGGTCATC
1995	bpr	AAGCTTTGCTCGAAGAAACTATGGGCAAGGACAAAGGCATGCTTACAGGAGGGCTGTTCAGATTCTGGGATACAGAGTTTGTATGGACCGGGTCATC
1996	bpr	AAGCTTTGCTCGAAGAAACTATGGGAGGCCTATGAAGGCGCTTATACGATTAAAGTCGCTGCACCGGGTTATTACAGTGATGATGTATGGACCGGGTCATC
1997	bpr	AAGCTTTGCTCGAAGAAACTATGGCTGTTACAGATGGATTAGGGAAAGCGGAAGGACAAGTTTCTGTAGAGGGGGATGACCAATGTATGGACCGGGTCATC
1998	bpr	AAGCTTTGCTCGAAGAAACTATGGATTTAGATGCAACGTTTACCATTCGTATGCCGCTGACCAATGCAAGAGCGAGTGTTGTATGGACCGGGTCATC
[truncated: 27,767 more rows]

## Sheet: Table S2 E coli probe order
Supplemental table 2, E coli probes ordered from TWIST Bioscience
Probe #	Target gene	Sequence
1	aaeA	AAGCTTTGCTCGAAGAAACTATGGTTGCGCTGGTGAAACAGAACTCCTTCTATGTACTGGCCTATATGGAAGAAACTAAGCTGTGTATGGACCGGGTCATCTGACACCATC
2	aaeA	AAGCTTTGCTCGAAGAAACTATGTGGACTCATTACCCAGGTGAATGTTCATGATAACCAGCTGGTGAAAAAAGGACAGATACTTGTATGGACCGGGTCATCTGACACCATC
3	aaeA	AAGCTTTGCTCGAAGAAACTATGAAAACACTAATAAGAAAATTCTCCCGTACGGCCATCACGGTCGTATTAGTCATTCTGGCCTGTATGGACCGGGTCATCTGACACCATC
4	aaeB	AAGCTTTGCTCGAAGAAACTATGCGCGCAATATCAATTAATGCAACTCTGTATCAAGCATGGCGATGGTGAAGTTGTCGATAATGTATGGACCGGGTCATCTGACACCATC
5	aaeB	AAGCTTTGCTCGAAGAAACTATGCACTTTATCAGCAGCTGTTTTTGCTGATGAATAAGTTCCCAGGGGATTTGCCGAAATTTCTGTATGGACCGGGTCATCTGACACCATC
6	aaeB	AAGCTTTGCTCGAAGAAACTATGGCCAGCACCATAAATATTATCGTGCTGGATAACCCGATGACTTTCCATTTCAGTCAGTTTTGTATGGACCGGGTCATCTGACACCATC
7	aaeB	AAGCTTTGCTCGAAGAAACTATGGTTGTAGCGAGATCGTTATCGGTATTGTGTGTGCGATTATGGCGGATTTGCTCTTTTCTCTGTATGGACCGGGTCATCTGACACCATC
8	aaeB	AAGCTTTGCTCGAAGAAACTATGGTATCTGGGCCGGTTTTTGTACCTGGATATCCTCGCTGGTACGAATAGAAAACTCGTATGTGTATGGACCGGGTCATCTGACACCATC
9	aaeR	AAGCTTTGCTCGAAGAAACTATGGTTTCGTCCATCAGTCAGACGGTATCAAAACTGGAAGATGAGTTGCAGGTAAAGCTGTTATGTATGGACCGGGTCATCTGACACCATC
10	aaeR	AAGCTTTGCTCGAAGAAACTATGTTTATGCGTTATATACCGAAAAAGATAAGCTGCCGCTGAAGGTACAGGTCGTGATCAACTTGTATGGACCGGGTCATCTGACACCATC
11	aaeR	AAGCTTTGCTCGAAGAAACTATGTTCGTCCATCAGTCAGACGGTATCAAAACTGGAAGATGAGTTGCAGGTAAAGCTGTTAAATGTATGGACCGGGTCATCTGACACCATC
12	aaeR	AAGCTTTGCTCGAAGAAACTATGTTTCGTCCATCAGTCAGACGGTATCAAAACTGGAAGATGAGTTGCAGGTAAAGCTGTTAATGTATGGACCGGGTCATCTGACACCATC
13	aaeR	AAGCTTTGCTCGAAGAAACTATGATCAGTCAGACGGTATCAAAACTGGAAGATGAGTTGCAGGTAAAGCTGTTAAACCGTAGCTGTATGGACCGGGTCATCTGACACCATC
14	aaeX	AAGCTTTGCTCGAAGAAACTATGTGTTTGGGCTGTCCTTCCCACCGATATTTTTTGAATTGCTTTTATCACTGGCGATTTTCTTGTATGGACCGGGTCATCTGACACCATC
15	aaeX	AAGCTTTGCTCGAAGAAACTATGGTTATCGTGGTGTTTGGGCTGTCCTTCCCACCGATATTTTTTGAATTGCTTTTATCACTGTGTATGGACCGGGTCATCTGACACCATC
16	aaeX	AAGCTTTGCTCGAAGAAACTATGGTGTTTGGGCTGTCCTTCCCACCGATATTTTTTGAATTGCTTTTATCACTGGCGATTTTTGTATGGACCGGGTCATCTGACACCATC
17	aaeX	AAGCTTTGCTCGAAGAAACTATGCCGTTATCGTGGTGTTTGGGCTGTCCTTCCCACCGATATTTTTTGAATTGCTTTTATCACTGTATGGACCGGGTCATCTGACACCATC
18	aaeX	AAGCTTTGCTCGAAGAAACTATGTATCGTGGTGTTTGGGCTGTCCTTCCCACCGATATTTTTTGAATTGCTTTTATCACTGGTGTATGGACCGGGTCATCTGACACCATC
19	aas	AAGCTTTGCTCGAAGAAACTATGCGTATGACTTCTATCGTCTACGCTATGTGGTGGCAGGCGCAGAAAAATTACAAGAAAGTATGTATGGACCGGGTCATCTGACACCATC
20	aas	AAGCTTTGCTCGAAGAAACTATGCATTTATCGACTTTGTTCCTCTCGACCCGACGCAACCTATGGCTATTAAACATCTGGTACTGTATGGACCGGGTCATCTGACACCATC
21	aas	AAGCTTTGCTCGAAGAAACTATGCCTAATCACGTCTCTTTTATTGATGGCATTTTGCTTGGACTGTTTTTACCTGTGCGTCCATGTATGGACCGGGTCATCTGACACCATC
22	aas	AAGCTTTGCTCGAAGAAACTATGCATAGCCATAAAAGCATTCTGGCGAATGTCGAGCAGATTAAAACGATTGCCGACTTCACTGTATGGACCGGGTCATCTGACACCATC
23	aas	AAGCTTTGCTCGAAGAAACTATGGGGAAGAAATGTGTCGAAGACGTCAACTTTACCCCAGACTCCTATCGCAAATTGCTTACTGTATGGACCGGGTCATCTGACACCATC
24	aat	AAGCTTTGCTCGAAGAAACTATGGGATTACCTTAATTATCTCAATCAAATGCGCCTCGGACGATTGCCGAATAATTTCTGGGTTGTATGGACCGGGTCATCTGACACCATC
25	aat	AAGCTTTGCTCGAAGAAACTATGGTAGTATGAAGCGATTTCATAAACGCTCGCCCTATCGTGTCACGATGAATTACGCTTTTGTGTATGGACCGGGTCATCTGACACCATC
26	aat	AAGCTTTGCTCGAAGAAACTATGTTACCTTAATTATCTCAATCAAATGCGCCTCGGACGATTGCCGAATAATTTCTGGGTACCTGTATGGACCGGGTCATCTGACACCATC
27	aat	AAGCTTTGCTCGAAGAAACTATGTAGTATGAAGCGATTTCATAAACGCTCGCCCTATCGTGTCACGATGAATTACGCTTTTGGTGTATGGACCGGGTCATCTGACACCATC
28	aat	AAGCTTTGCTCGAAGAAACTATGCGTAGTATGAAGCGATTTCATAAACGCTCGCCCTATCGTGTCACGATGAATTACGCTTTTTGTATGGACCGGGTCATCTGACACCATC
29	abgA	AAGCTTTGCTCGAAGAAACTATGTCTTTGAATCAATTTGTTAATTCGCTTGCCCCAAAATTATCGCACTGGCGACGTGATTTTTGTATGGACCGGGTCATCTGACACCATC
30	abgA	AAGCTTTGCTCGAAGAAACTATGGTCTTTGAATCAATTTGTTAATTCGCTTGCCCCAAAATTATCGCACTGGCGACGTGATTTTGTATGGACCGGGTCATCTGACACCATC
31	abgA	AAGCTTTGCTCGAAGAAACTATGAATTTGTTAATTCGCTTGCCCCAAAATTATCGCACTGGCGACGTGATTTTCATCACTATGTGTATGGACCGGGTCATCTGACACCATC
32	abgA	AAGCTTTGCTCGAAGAAACTATGCAATTTGTTAATTCGCTTGCCCCAAAATTATCGCACTGGCGACGTGATTTTCATCACTATTGTATGGACCGGGTCATCTGACACCATC
33	abgA	AAGCTTTGCTCGAAGAAACTATGAATCAATTTGTTAATTCGCTTGCCCCAAAATTATCGCACTGGCGACGTGATTTTCATCACTGTATGGACCGGGTCATCTGACACCATC
34	abgB	AAGCTTTGCTCGAAGAAACTATGACCAACTTCCTCAACGAACATATTATTGAAAAAGCGCGCGTACACTATGCCATCACAAATTGTATGGACCGGGTCATCTGACACCATC
35	abgB	AAGCTTTGCTCGAAGAAACTATGACTTCCTCAACGAACATATTATTGAAAAAGCGCGCGTACACTATGCCATCACAAATAGCGTGTATGGACCGGGTCATCTGACACCATC
36	abgB	AAGCTTTGCTCGAAGAAACTATGGAAAACTATGGCAGCAACCACAGTCAATCTCTTCCTTGATTCAGGGCTATTGCAAGAATGTGTATGGACCGGGTCATCTGACACCATC
37	abgB	AAGCTTTGCTCGAAGAAACTATGTACCGATATTGCCGATCAAATCTGGGATCATCCAGAAACACGTTTTGAAGAGTTCTGGTCTGTATGGACCGGGTCATCTGACACCATC
38	abgB	AAGCTTTGCTCGAAGAAACTATGGGAAATCTATCGTTTTATCGACGATGCGATTGAAGCCGATCGCCAACGTTATACCGATATTGTATGGACCGGGTCATCTGACACCATC
39	abgR	AAGCTTTGCTCGAAGAAACTATGGTTGAATATGTCGCAACCGGCACTGAGTAAATCTATTCAGGAGCTAGAAGAAGGGTTAGCTGTATGGACCGGGTCATCTGACACCATC
40	abgR	AAGCTTTGCTCGAAGAAACTATGGTGACGTTAACTGATGCCGGTGAAAGTTTTTATCAGCACGCCAGTCTAATTCTTGAAGAGTGTATGGACCGGGTCATCTGACACCATC
41	abgR	AAGCTTTGCTCGAAGAAACTATGCATCCGCAGGTAAAAGTACGCATTATGGAAGGGCAACTGGTGTCGATGATTAATGAATTGTGTATGGACCGGGTCATCTGACACCATC
42	abgR	AAGCTTTGCTCGAAGAAACTATGTAAATCTATTCAGGAGCTAGAAGAAGGGTTAGCGGCGCAACTCTTTTTTCGCCGTAGTAATGTATGGACCGGGTCATCTGACACCATC
43	abgR	AAGCTTTGCTCGAAGAAACTATGCAGCTGTCATATCTCGTTTTCATCAGCAGCATCCGCAGGTAAAAGTACGCATTATGGAAGTGTATGGACCGGGTCATCTGACACCATC
44	abgT	AAGCTTTGCTCGAAGAAACTATGTTAAAGGTATCGTGCCACTGATCATTCTTTTTTTCTTTGTTGTCTCGCTGGCTTATGGCATGTATGGACCGGGTCATCTGACACCATC
45	abgT	AAGCTTTGCTCGAAGAAACTATGGTCGTGGTGAAAAACCTGCTCAGTGTGGAAGGATTACACTGGTTTTTACCCAATGTTATTTGTATGGACCGGGTCATCTGACACCATC
46	abgT	AAGCTTTGCTCGAAGAAACTATGGGATTTACCGCATTTAATGATTGAACCGATGAAAGAGATGGCGGGATTTATCGTGATGGTTGTATGGACCGGGTCATCTGACACCATC
47	abgT	AAGCTTTGCTCGAAGAAACTATGACAAACCAGACGCGAAACTGGGTACTTACTATTCGTTAGTCTTGCCCTATCCACTTATCTTGTATGGACCGGGTCATCTGACACCATC
48	abgT	AAGCTTTGCTCGAAGAAACTATGTTATATGGTGCTGTTTATTGCTTTTTTCAGCCACATTTCTTCCGATGCGGCGTTAGTGATTGTATGGACCGGGTCATCTGACACCATC
49	abrB	AAGCTTTGCTCGAAGAAACTATGGTTAACCAGCATATCGTCTGGTTCCCGCCAGTGAGCATTAATCTCCTGCTTACTATTTTGTGTATGGACCGGGTCATCTGACACCATC
50	abrB	AAGCTTTGCTCGAAGAAACTATGGGGGAATGTTATGTGTGCTATCACTTCTCCTTTCTATTGGTTTCCTCGCGGTACATCTCTGTATGGACCGGGTCATCTGACACCATC
51	abrB	AAGCTTTGCTCGAAGAAACTATGGGAATGTTATGTGTGCTATCACTTCTCCTTTCTATTGGTTTCCTCGCGGTACATCTCCCTGTATGGACCGGGTCATCTGACACCATC
52	abrB	AAGCTTTGCTCGAAGAAACTATGGGGAATGTTATGTGTGCTATCACTTCTCCTTTCTATTGGTTTCCTCGCGGTACATCTCCTGTATGGACCGGGTCATCTGACACCATC
53	abrB	AAGCTTTGCTCGAAGAAACTATGGAATGTTATGTGTGCTATCACTTCTCCTTTCTATTGGTTTCCTCGCGGTACATCTCCCGTGTATGGACCGGGTCATCTGACACCATC
54	accA	AAGCTTTGCTCGAAGAAACTATGCGAAAATCGATTCTCTGACTGCGGTTAGCCGTCAGGATGAGAAACTGGATATTAACATCGTGTATGGACCGGGTCATCTGACACCATC
55	accA	AAGCTTTGCTCGAAGAAACTATGAAATCGATTCTCTGACTGCGGTTAGCCGTCAGGATGAGAAACTGGATATTAACATCGATGTGTATGGACCGGGTCATCTGACACCATC
56	accA	AAGCTTTGCTCGAAGAAACTATGGATCTCGACGTGTTAAGCACTGAAGATTTAAAAAATCGTCGTTATCAGCGCCTGATGAGCTGTATGGACCGGGTCATCTGACACCATC
57	accA	AAGCTTTGCTCGAAGAAACTATGCATCGATGAAGAAGTGCATCGTCTGCGTGAAAAAAGCGTAGAACTGACACGTAAAATCTTTGTATGGACCGGGTCATCTGACACCATC
58	accA	AAGCTTTGCTCGAAGAAACTATGTTGGTCATCAAAAAGGTCGTGAAACCAAAGAAAAAATTCGCCGTAACTTTGGTATGCCAGTGTATGGACCGGGTCATCTGACACCATC
59	accB	AAGCTTTGCTCGAAGAAACTATGTCGTAAGATTAAAAAACTGATCGAGCTGGTTGAAGAATCAGGCATCTCCGAACTGGAAATTGTATGGACCGGGTCATCTGACACCATC
60	accB	AAGCTTTGCTCGAAGAAACTATGATTCGTAAGATTAAAAAACTGATCGAGCTGGTTGAAGAATCAGGCATCTCCGAACTGGAATGTATGGACCGGGTCATCTGACACCATC
61	accB	AAGCTTTGCTCGAAGAAACTATGTTGAAGAATCAGGCATCTCCGAACTGGAAATTTCTGAAGGCGAAGAGTCAGTACGCATTATGTATGGACCGGGTCATCTGACACCATC
62	accB	AAGCTTTGCTCGAAGAAACTATGAAAAAACTGATCGAGCTGGTTGAAGAATCAGGCATCTCCGAACTGGAAATTTCTGAAGGCTGTATGGACCGGGTCATCTGACACCATC
63	accB	AAGCTTTGCTCGAAGAAACTATGTGAAGAATCAGGCATCTCCGAACTGGAAATTTCTGAAGGCGAAGAGTCAGTACGCATTAGTGTATGGACCGGGTCATCTGACACCATC
64	accC	AAGCTTTGCTCGAAGAAACTATGAAGCGAAAGCTGCTTTCAGCAACGATATGGTTTACATGGAGAAATACCTGGAAAATCCTCTGTATGGACCGGGTCATCTGACACCATC
65	accC	AAGCTTTGCTCGAAGAAACTATGGAAGCGAAAGCTGCTTTCAGCAACGATATGGTTTACATGGAGAAATACCTGGAAAATCCTTGTATGGACCGGGTCATCTGACACCATC
66	accC	AAGCTTTGCTCGAAGAAACTATGATCATGAATGACGAGAACTTCCAGCATGGTGGCACTAACATCCACTATCTGGAGAAAAAATGTATGGACCGGGTCATCTGACACCATC
67	accC	AAGCTTTGCTCGAAGAAACTATGATATGGATAAAAACCGTGCCATTGCTAAACGCATTGGTTATCCGGTGATTATCAAAGCCTTGTATGGACCGGGTCATCTGACACCATC
68	accC	AAGCTTTGCTCGAAGAAACTATGGATATGGTTTACATGGAGAAATACCTGGAAAATCCTCGCCACGTCGAGATTCAGGTACTGTGTATGGACCGGGTCATCTGACACCATC
69	accD	AAGCTTTGCTCGAAGAAACTATGGAGCTTGAGCCGAAAGATGTGCTGAAGTTTCGTGACTCCAAGAAGTATAAAGACCGTCTGTGTATGGACCGGGTCATCTGACACCATC
70	accD	AAGCTTTGCTCGAAGAAACTATGCTTGAGCCGAAAGATGTGCTGAAGTTTCGTGACTCCAAGAAGTATAAAGACCGTCTGGTGTATGGACCGGGTCATCTGACACCATC
71	accD	AAGCTTTGCTCGAAGAAACTATGCTGAAGTTTCGTGACTCCAAGAAGTATAAAGACCGTCTGGCATCTGCGCAGAAAGAAATGTATGGACCGGGTCATCTGACACCATC
72	accD	AAGCTTTGCTCGAAGAAACTATGGTAGCGAGCTTGAGCCGAAAGATGTGCTGAAGTTTCGTGACTCCAAGAAGTATAAAGACCTGTATGGACCGGGTCATCTGACACCATC
73	accD	AAGCTTTGCTCGAAGAAACTATGGGTAGCGAGCTTGAGCCGAAAGATGTGCTGAAGTTTCGTGACTCCAAGAAGTATAAAGACTGTATGGACCGGGTCATCTGACACCATC
74	aceA	AAGCTTTGCTCGAAGAAACTATGAAGATGGCTATACCTTCGTATCTCACCAGCAGGAAGTGGGTACAGGTTACTTCGATAAAGTGTATGGACCGGGTCATCTGACACCATC
75	aceA	AAGCTTTGCTCGAAGAAACTATGCACAACAAATTGAAGAATTACAGAAAGAGTGGACTCAACCGCGTTGGGAAGGCATTACTCTGTATGGACCGGGTCATCTGACACCATC
76	aceA	AAGCTTTGCTCGAAGAAACTATGATCTCACCAGCAGGAAGTGGGTACAGGTTACTTCGATAAAGTGACGACTATTATTCAGGGTGTATGGACCGGGTCATCTGACACCATC
77	aceA	AAGCTTTGCTCGAAGAAACTATGCCTTCGTATCTCACCAGCAGGAAGTGGGTACAGGTTACTTCGATAAAGTGACGACTATTATGTATGGACCGGGTCATCTGACACCATC
78	aceA	AAGCTTTGCTCGAAGAAACTATGTACACAACAAATTGAAGAATTACAGAAAGAGTGGACTCAACCGCGTTGGGAAGGCATTACTGTATGGACCGGGTCATCTGACACCATC
79	aceB	AAGCTTTGCTCGAAGAAACTATGATGGATAAACCATTCCTGAATGCTTACTCACGCCTGTTGATTAAAACCTGCCATAAACGCTGTATGGACCGGGTCATCTGACACCATC
80	aceB	AAGCTTTGCTCGAAGAAACTATGAACGTTGCCTGATTTTATTTCGGAAACAGCTTCCATTCGCGATGCTGATTGGAAAATTCTGTATGGACCGGGTCATCTGACACCATC
81	aceB	AAGCTTTGCTCGAAGAAACTATGCAATGTGAAAGTCTTTATGGCCGATTTCGAAGATTCACTGGCACCAGACTGGAACAAAGTGTATGGACCGGGTCATCTGACACCATC
82	aceB	AAGCTTTGCTCGAAGAAACTATGCTATTTCTTCCACAACTATCAGGCACTGTTGGCAAAGGGCAGTGGTCCCTATTTCTATCTGTATGGACCGGGTCATCTGACACCATC
83	aceB	AAGCTTTGCTCGAAGAAACTATGGAAGCAAATTCTTACTGCCGAAGCGGTAGAATTTCTGACTGAGCTGGTGACGCATTTTACTGTATGGACCGGGTCATCTGACACCATC
84	aceE	AAGCTTTGCTCGAAGAAACTATGAAGAAAGTGGTTGCTGACGCAATCGCCAAATTCAACATCGATGCAGATAAAGTTAACCTGTATGGACCGGGTCATCTGACACCATC
85	aceE	AAGCTTTGCTCGAAGAAACTATGGAAAGCGCAGGAAACCAAAGGCAAAGCGACAGTAATCCTTGCTCATACCATTAAAGGTTATGTATGGACCGGGTCATCTGACACCATC
86	aceE	AAGCTTTGCTCGAAGAAACTATGATATCGAAAAACTGCCGTACATCACCTTCCCGGAAGGTTCTGAAGAGCATACCTATCTGTGTATGGACCGGGTCATCTGACACCATC
87	aceE	AAGCTTTGCTCGAAGAAACTATGCTTACTATAAAGAAGACGAGAAAGGTCAGATTCTGCAGGAAGGGATCAACGAGCTGGGTGTATGGACCGGGTCATCTGACACCATC
88	aceE	AAGCTTTGCTCGAAGAAACTATGATATGGCGTCCTTCCAGTCTTCCGCAACCATTTATGATGTGTGCTTTAACCACTTCTTCTGTATGGACCGGGTCATCTGACACCATC
89	aceF	AAGCTTTGCTCGAAGAAACTATGAACTGAAAGTCAACGTTGGCGATAAAGTGAAAACTGGCTCGCTGATTATGATCTTCGAAGTGTATGGACCGGGTCATCTGACACCATC
90	aceF	AAGCTTTGCTCGAAGAAACTATGAAGGAACTGAAAGTCAACGTTGGCGATAAAGTGAAAACTGGCTCGCTGATTATGATCTTCTGTATGGACCGGGTCATCTGACACCATC
91	aceF	AAGCTTTGCTCGAAGAAACTATGGAAGGAACTGAAAGTCAACGTTGGCGATAAAGTGAAAACTGGCTCGCTGATTATGATCTTTGTATGGACCGGGTCATCTGACACCATC
92	aceF	AAGCTTTGCTCGAAGAAACTATGGAAAGTCAACGTTGGCGATAAAGTGAAAACTGGCTCGCTGATTATGATCTTCGAAGTTGATGTATGGACCGGGTCATCTGACACCATC
93	aceF	AAGCTTTGCTCGAAGAAACTATGGAACTGAAAGTCAACGTTGGCGATAAAGTGAAAACTGGCTCGCTGATTATGATCTTCGAATGTATGGACCGGGTCATCTGACACCATC
94	aceK	AAGCTTTGCTCGAAGAAACTATGCCGAAAGCTACCGCGAATATCTCGTTTATCTACAGGGCTGTAATGAGCAGTTCATTGAAGTGTATGGACCGGGTCATCTGACACCATC
95	aceK	AAGCTTTGCTCGAAGAAACTATGCGTCACGGGCGTGTGGTTTTTTATGATTACGATGAAATTTGCTACATGACGGAAGTGAATTGTATGGACCGGGTCATCTGACACCATC
96	aceK	AAGCTTTGCTCGAAGAAACTATGTTAAAAACTTCGGTGTCACCCGTCACGGGCGTGTGGTTTTTTATGATTACGATGAAATTTTGTATGGACCGGGTCATCTGACACCATC
97	aceK	AAGCTTTGCTCGAAGAAACTATGTTTAAAAACTTCGGTGTCACCCGTCACGGGCGTGTGGTTTTTTATGATTACGATGAAATTTGTATGGACCGGGTCATCTGACACCATC
98	aceK	AAGCTTTGCTCGAAGAAACTATGAAACCGAAAGCTACCGCGAATATCTCGTTTATCTACAGGGCTGTAATGAGCAGTTCATTGTGTATGGACCGGGTCATCTGACACCATC
99	ackA	AAGCTTTGCTCGAAGAAACTATGGTTCTGAACTGCGGTAGTTCTTCACTGAAATTTGCCATCATCGATGCAGTAAATGGTGAATGTATGGACCGGGTCATCTGACACCATC
100	ackA	AAGCTTTGCTCGAAGAAACTATGCAGCGAAGCGCTCAACTTTATCGTTAATACTATTCTGGCACAAAAACCAGAACTGTCTGCTGTATGGACCGGGTCATCTGACACCATC
101	ackA	AAGCTTTGCTCGAAGAAACTATGGAAGCGCTCAACTTTATCGTTAATACTATTCTGGCACAAAAACCAGAACTGTCTGCGCAGTGTATGGACCGGGTCATCTGACACCATC
102	ackA	AAGCTTTGCTCGAAGAAACTATGGCTCACAGCGAAGCGCTCAACTTTATCGTTAATACTATTCTGGCACAAAAACCAGAACTGTGTATGGACCGGGTCATCTGACACCATC
103	ackA	AAGCTTTGCTCGAAGAAACTATGCTGAACTGCGGTAGTTCTTCACTGAAATTTGCCATCATCGATGCAGTAAATGGTGAAGAGTGTATGGACCGGGTCATCTGACACCATC
104	acnA	AAGCTTTGCTCGAAGAAACTATGCTAAATCACTGGGCGATATCACCCGTCTACCCAAGTCACTCAAAGTTTTGCTCGAAAACTGTATGGACCGGGTCATCTGACACCATC
105	acnA	AAGCTTTGCTCGAAGAAACTATGTACGAGAAGCCAGTAAGGACACGTTGCAGGCCAAAGATAAAACTTACCACTACTACAGTGTATGGACCGGGTCATCTGACACCATC
106	acnA	AAGCTTTGCTCGAAGAAACTATGTTTCTGATTATCTGGCAAAAGCGAAACTGACACCGTATCTCGACGAACTGGGGTTTAATGTATGGACCGGGTCATCTGACACCATC
107	acnA	AAGCTTTGCTCGAAGAAACTATGATTCGTGTGGTGATTGCCGAATCGTTTGAACGAATTCACCGTTCGAATTTAATTGGCATTGTATGGACCGGGTCATCTGACACCATC
108	acnA	AAGCTTTGCTCGAAGAAACTATGGAAAATTACGTGAAGGTATTACCGCCACAGACCTGGTTCTCACTGTTACCCAAATGCTGTGTATGGACCGGGTCATCTGACACCATC
109	acnB	AAGCTTTGCTCGAAGAAACTATGACTTTCTCACACGCTGCTGATGTTCGATAACTTCTATGACGTAGAAGAGAAAGCGAAAGCTGTATGGACCGGGTCATCTGACACCATC
110	acnB	AAGCTTTGCTCGAAGAAACTATGTTTCTCACACGCTGCTGATGTTCGATAACTTCTATGACGTAGAAGAGAAAGCGAAAGCAGTGTATGGACCGGGTCATCTGACACCATC
111	acnB	AAGCTTTGCTCGAAGAAACTATGCTTTCTCACACGCTGCTGATGTTCGATAACTTCTATGACGTAGAAGAGAAAGCGAAAGCATGTATGGACCGGGTCATCTGACACCATC
112	acnB	AAGCTTTGCTCGAAGAAACTATGCAGCCGTTGATACTTACCGTTATCTGAACTTCAACCAGCTTTCTCAGTACACCGAGAAAGTGTATGGACCGGGTCATCTGACACCATC
113	acnB	AAGCTTTGCTCGAAGAAACTATGGCACTTTCTCACACGCTGCTGATGTTCGATAACTTCTATGACGTAGAAGAGAAAGCGAAATGTATGGACCGGGTCATCTGACACCATC
114	acpH	AAGCTTTGCTCGAAGAAACTATGGTGATGACGATTTTGCCGGACTCACCGCCACGTTTTATCAATCTGAACAATTACTTGTGTGTATGGACCGGGTCATCTGACACCATC
115	acpH	AAGCTTTGCTCGAAGAAACTATGAAGTGATGACGATTTTGCCGGACTCACCGCCACGTTTTATCAATCTGAACAATTACTTTGTATGGACCGGGTCATCTGACACCATC
116	acpH	AAGCTTTGCTCGAAGAAACTATGAGTGATGACGATTTTGCCGGACTCACCGCCACGTTTTATCAATCTGAACAATTACTTGTGTATGGACCGGGTCATCTGACACCATC
117	acpH	AAGCTTTGCTCGAAGAAACTATGCAAGTGATGACGATTTTGCCGGACTCACCGCCACGTTTTATCAATCTGAACAATTACTTGTATGGACCGGGTCATCTGACACCATC
118	acpH	AAGCTTTGCTCGAAGAAACTATGAGTGATGACGATTTTGCCGGACTCACCGCCACGTTTTATCAATCTGAACAATTACTTGTGTGTATGGACCGGGTCATCTGACACCATC
119	acpP	AAGCTTTGCTCGAAGAAACTATGGATTCTCTTGACACCGTTGAGCTGGTAATGGCTCTGGAAGAAGAGTTTGATACTGAGATTTGTATGGACCGGGTCATCTGACACCATC
120	acpP	AAGCTTTGCTCGAAGAAACTATGTGGTAATGGCTCTGGAAGAAGAGTTTGATACTGAGATTCCGGACGAAGAAGCTGAGAAAATGTATGGACCGGGTCATCTGACACCATC
121	acpP	AAGCTTTGCTCGAAGAAACTATGGCTCTGGAAGAAGAGTTTGATACTGAGATTCCGGACGAAGAAGCTGAGAAAATCACCACTGTATGGACCGGGTCATCTGACACCATC
122	acpP	AAGCTTTGCTCGAAGAAACTATGCTGGTAATGGCTCTGGAAGAAGAGTTTGATACTGAGATTCCGGACGAAGAAGCTGAGAAATGTATGGACCGGGTCATCTGACACCATC
123	acpP	AAGCTTTGCTCGAAGAAACTATGGGAAGAAGAGTTTGATACTGAGATTCCGGACGAAGAAGCTGAGAAAATCACCACCGTTCTGTATGGACCGGGTCATCTGACACCATC
124	acpS	AAGCTTTGCTCGAAGAAACTATGCGTTTAATCAATTTGAAGTATTCAATGATGAGCTCGGCAAACCACGGCTACGGCTATGGTGTATGGACCGGGTCATCTGACACCATC
125	acpS	AAGCTTTGCTCGAAGAAACTATGGCAATGGTCTGGCGTTTAATCAATTTGAAGTATTCAATGATGAGCTCGGCAAACCACGTGTATGGACCGGGTCATCTGACACCATC
126	acpS	AAGCTTTGCTCGAAGAAACTATGCGCAATGGTCTGGCGTTTAATCAATTTGAAGTATTCAATGATGAGCTCGGCAAACCACTGTATGGACCGGGTCATCTGACACCATC
127	acpS	AAGCTTTGCTCGAAGAAACTATGGGATCCGCAATGGTCTGGCGTTTAATCAATTTGAAGTATTCAATGATGAGCTCGGCAAATGTATGGACCGGGTCATCTGACACCATC
128	acpS	AAGCTTTGCTCGAAGAAACTATGGCGTTTAATCAATTTGAAGTATTCAATGATGAGCTCGGCAAACCACGGCTACGGCTATGTGTATGGACCGGGTCATCTGACACCATC
129	acpT	AAGCTTTGCTCGAAGAAACTATGTAGACAGCACCTATCACTCCTCGCTGTCAGTCAGCCATTGTCAGCTTGAAAATTTAATGTATGGACCGGGTCATCTGACACCATC
130	acpT	AAGCTTTGCTCGAAGAAACTATGGTAGACAGCACCTATCACTCCTCGCTGTCAGTCAGCCATTGTCAGCTTGAAAATTTAAGCTGTATGGACCGGGTCATCTGACACCATC
131	acpT	AAGCTTTGCTCGAAGAAACTATGGTAGACAGCACCTATCACTCCTCGCTGTCAGTCAGCCATTGTCAGCTTGAAAATTTATGTATGGACCGGGTCATCTGACACCATC
132	acpT	AAGCTTTGCTCGAAGAAACTATGCGTAGACAGCACCTATCACTCCTCGCTGTCAGTCAGCCATTGTCAGCTTGAAAATTTAATGTATGGACCGGGTCATCTGACACCATC
133	acpT	AAGCTTTGCTCGAAGAAACTATGTAGACAGCACCTATCACTCCTCGCTGTCAGTCAGCCATTGTCAGCTTGAAAATTTATGTATGGACCGGGTCATCTGACACCATC
134	acrA	AAGCTTTGCTCGAAGAAACTATGACGGTGAATCGTTATCAGAAACTGCTCGGTACTCAGTACATCAGTAAGCAAGAGTACGATTGTATGGACCGGGTCATCTGACACCATC
135	acrA	AAGCTTTGCTCGAAGAAACTATGAATCGTTATCAGAAACTGCTCGGTACTCAGTACATCAGTAAGCAAGAGTACGATCAGGCTTGTATGGACCGGGTCATCTGACACCATC
136	acrA	AAGCTTTGCTCGAAGAAACTATGGCAATTGACGGTGAATCGTTATCAGAAACTGCTCGGTACTCAGTACATCAGTAAGCAAGATGTATGGACCGGGTCATCTGACACCATC
137	acrA	AAGCTTTGCTCGAAGAAACTATGGTTATCAGAAACTGCTCGGTACTCAGTACATCAGTAAGCAAGAGTACGATCAGGCTCTGGTGTATGGACCGGGTCATCTGACACCATC
138	acrA	AAGCTTTGCTCGAAGAAACTATGGTCCTCAAGTTAGCGGGATTATCCTGAAGCGTAATTTCAAAGAAGGTAGCGACATCGAAGTGTATGGACCGGGTCATCTGACACCATC
139	acrB	AAGCTTTGCTCGAAGAAACTATGGGCCTTCTTTGGCGGTTCTACTGGTGCTATCTATCGTCAGTTCTCTATTACCATTGTTTCTGTATGGACCGGGTCATCTGACACCATC
140	acrB	AAGCTTTGCTCGAAGAAACTATGCTGAAAATTGTTTACCCATACGACACCACGCCGTTCGTGAAAATCTCTATTCACGAAGTGTGTATGGACCGGGTCATCTGACACCATC
141	acrB	AAGCTTTGCTCGAAGAAACTATGCCTAATTTCTTTATCGATCGCCCGATTTTTGCGTGGGTGATCGCCATTATCATCATGTTGTGTATGGACCGGGTCATCTGACACCATC
142	acrB	AAGCTTTGCTCGAAGAAACTATGTACGTCCAAACGGTCTGGAAGATACCCCGCAGTTTAAGATTGATATCGACCAGGAAAAAGTGTATGGACCGGGTCATCTGACACCATC
143	acrB	AAGCTTTGCTCGAAGAAACTATGCTTAACGCCTCTATTATTGCTCAGACGCGTCTGACCTCTACTGAAGAGTTCGGCAAAATCTGTATGGACCGGGTCATCTGACACCATC
144	acrD	AAGCTTTGCTCGAAGAAACTATGGACCATTGCCTTCGTCTCTACCGATGGTTCGATGGATAAACAGGATATTGCTGATTATGTTGTATGGACCGGGTCATCTGACACCATC
145	acrD	AAGCTTTGCTCGAAGAAACTATGTGACCATTGCCTTCGTCTCTACCGATGGTTCGATGGATAAACAGGATATTGCTGATTATGTGTATGGACCGGGTCATCTGACACCATC
146	acrD	AAGCTTTGCTCGAAGAAACTATGATGTATATGTCATCTCAGAGCAGTGGCACCGGTCAGGCATCTGTCACTTTAAGTTTTAAATGTATGGACCGGGTCATCTGACACCATC
147	acrD	AAGCTTTGCTCGAAGAAACTATGCGTGACCCAGGTTATCGAGCAAAATATGACCGGCCTCGATAATCTCATGTATATGTCATCTGTATGGACCGGGTCATCTGACACCATC
148	acrD	AAGCTTTGCTCGAAGAAACTATGACCATTGCCTTCGTCTCTACCGATGGTTCGATGGATAAACAGGATATTGCTGATTATGTTTGTATGGACCGGGTCATCTGACACCATC
149	acrE	AAGCTTTGCTCGAAGAAACTATGAGGTTACCGTTCATATTGTAAAAACGGCCCCGTTAGAAGTTAAGACTGAATTACCAGGCCTGTATGGACCGGGTCATCTGACACCATC
150	acrE	AAGCTTTGCTCGAAGAAACTATGAATCCAGCAACGATTTTATGAGGCTGAAGCAATCCGTAGAGCAAGGAAATTTGCATAAGGTGTATGGACCGGGTCATCTGACACCATC
151	acrE	AAGCTTTGCTCGAAGAAACTATGGTTAGAAGTTAAGACTGAATTACCAGGCCGCACCAATGCTTATCGTATAGCCGAAGTTCGTGTATGGACCGGGTCATCTGACACCATC
152	acrE	AAGCTTTGCTCGAAGAAACTATGCGTTAGAAGTTAAGACTGAATTACCAGGCCGCACCAATGCTTATCGTATAGCCGAAGTTCTGTATGGACCGGGTCATCTGACACCATC
153	acrE	AAGCTTTGCTCGAAGAAACTATGCCAGCAACGATTTTATGAGGCTGAAGCAATCCGTAGAGCAAGGAAATTTGCATAAGGAAATGTATGGACCGGGTCATCTGACACCATC
154	acrF	AAGCTTTGCTCGAAGAAACTATGTTTACTGATCTATGCGCTGATTGTTGCAGGAATGGTGGTGTTGTTTTTACGTCTTCCGTGTATGGACCGGGTCATCTGACACCATC
155	acrF	AAGCTTTGCTCGAAGAAACTATGGAAGAACGAGAAAGCGAACGTTGAAAGTGTCTTTACGGTTAACGGCTTTAGCTTCAGCTGTATGGACCGGGTCATCTGACACCATC
156	acrF	AAGCTTTGCTCGAAGAAACTATGCAACAATTGAACGCCTCGATTATTGCTCAGACGCGGTTTAAAAATCCGGAAGAATTCGTGTATGGACCGGGTCATCTGACACCATC
157	acrF	AAGCTTTGCTCGAAGAAACTATGAACAGAATATGAACGGTATCGATAACCTGATGTATATGTCCTCCACCAGCGATTCCGCTGTATGGACCGGGTCATCTGACACCATC
158	acrF	AAGCTTTGCTCGAAGAAACTATGGATCTCATGGAGAAAGAGGGTAAAGGTGTTGTTGAAGCGACACTGATGGCAGTACGTATGTGTATGGACCGGGTCATCTGACACCATC
159	acrR	AAGCTTTGCTCGAAGAAACTATGTGATCTTAAAAAAGAAGCCCGCGATTACGTTGCCATCTTACTGGAGATGTATCTCCTGTGTGTATGGACCGGGTCATCTGACACCATC
160	acrR	AAGCTTTGCTCGAAGAAACTATGTGTGCAACAGGCACAACGTAATCTCTGTCTGGAAAGTTATGACCGTATAGAACAAACGTTTGTATGGACCGGGTCATCTGACACCATC
161	acrR	AAGCTTTGCTCGAAGAAACTATGACAAACGTTAAAACATTGTATTGAAGCGAAAATGTTGCCTGCGGATTTAATGACGCGTCGTGTATGGACCGGGTCATCTGACACCATC
162	acrR	AAGCTTTGCTCGAAGAAACTATGGAATCCACGGTGACAGAAGAACGGCGTCGATTATTGATGGAGATTATATTCCACAAATGCTGTATGGACCGGGTCATCTGACACCATC
163	acrR	AAGCTTTGCTCGAAGAAACTATGTATATTTCCGGCCTGATGGAAAACTGGCTCTTTGCCCCGCAATCTTTTGATCTTAAAAAATGTATGGACCGGGTCATCTGACACCATC
164	acs	AAGCTTTGCTCGAAGAAACTATGGTTATCTGGTGTACGCGGCGCTGACCTTTAAATATGTCTTTGATTATCATCCGGGTGATATGTATGGACCGGGTCATCTGACACCATC
165	acs	AAGCTTTGCTCGAAGAAACTATGCACGAACGTTTTGAACAGACCTACTTCTCCACCTTCAAAAATATGTATTTCAGCGGCGACTGTATGGACCGGGTCATCTGACACCATC
166	acs	AAGCTTTGCTCGAAGAAACTATGTATTAACGTACCTGATACCTTCTGGGGCGAACAGGGAAAAATTCTTGACTGGATCAAACCTGTATGGACCGGGTCATCTGACACCATC
167	acs	AAGCTTTGCTCGAAGAAACTATGACCTTTAAATATGTCTTTGATTATCATCCGGGTGATATCTACTGGTGCACCGCCGATGTGTGTATGGACCGGGTCATCTGACACCATC
168	acs	AAGCTTTGCTCGAAGAAACTATGTATCTGGTGTACGCGGCGCTGACCTTTAAATATGTCTTTGATTATCATCCGGGTGATATCTGTATGGACCGGGTCATCTGACACCATC
169	actP	AAGCTTTGCTCGAAGAAACTATGTTATTATGTTCCTGATTTTCGTCGTGTTTACGCTCGGCATTACCTACTGGGCATCAAAACTGTATGGACCGGGTCATCTGACACCATC
170	actP	AAGCTTTGCTCGAAGAAACTATGCAGCTTTATGGCCTTTATGGTGATGAAACACGTCGGCTTTAGCTTCAACAATCTGTTCAGTGTATGGACCGGGTCATCTGACACCATC
171	actP	AAGCTTTGCTCGAAGAAACTATGGCTTTATGGCCTTTATGGTGATGAAACACGTCGGCTTTAGCTTCAACAATCTGTTCAGTGTGTATGGACCGGGTCATCTGACACCATC
172	actP	AAGCTTTGCTCGAAGAAACTATGAGAGCGTGTTCTACGCCACCGGGTTTATGGGCTACTTCTATATTCTGACCTTTATTATCGTGTATGGACCGGGTCATCTGACACCATC
173	actP	AAGCTTTGCTCGAAGAAACTATGGATTATTATGTTCCTGATTTTCGTCGTGTTTACGCTCGGCATTACCTACTGGGCATCAAATGTATGGACCGGGTCATCTGACACCATC
174	ada	AAGCTTTGCTCGAAGAAACTATGGATGAGTCCATTTCATCTACATCGGTTGTTTAAAGCGACTACCGGAATGACGCCTAAAGTGTATGGACCGGGTCATCTGACACCATC
175	ada	AAGCTTTGCTCGAAGAAACTATGCGATGAGTCCATTTCATCTACATCGGTTGTTTAAAGCGACTACCGGAATGACGCCTAATGTATGGACCGGGTCATCTGACACCATC
176	ada	AAGCTTTGCTCGAAGAAACTATGTGAGTCCATTTCATCTACATCGGTTGTTTAAAGCGACTACCGGAATGACGCCTAAAGCTGTATGGACCGGGTCATCTGACACCATC
177	ada	AAGCTTTGCTCGAAGAAACTATGGCGATGAGTCCATTTCATCTACATCGGTTGTTTAAAGCGACTACCGGAATGACGCCTAAATGTATGGACCGGGTCATCTGACACCATC
178	ada	AAGCTTTGCTCGAAGAAACTATGATGAGTCCATTTCATCTACATCGGTTGTTTAAAGCGACTACCGGAATGACGCCTAAAGCCTGTATGGACCGGGTCATCTGACACCATC
179	add	AAGCTTTGCTCGAAGAAACTATGCTGATGGATTTTCTCGCCGAGCAACAAATTGGTATTGAATCCTGTCTGACCTCCAATATTTGTATGGACCGGGTCATCTGACACCATC
180	add	AAGCTTTGCTCGAAGAAACTATGCAACAAATTGGTATTGAATCCTGTCTGACCTCCAATATTCAGACCAGCACCGTAGCAGAGTGTATGGACCGGGTCATCTGACACCATC
181	add	AAGCTTTGCTCGAAGAAACTATGATTTTCTCGCCGAGCAACAAATTGGTATTGAATCCTGTCTGACCTCCAATATTCAGACCATGTATGGACCGGGTCATCTGACACCATC
182	add	AAGCTTTGCTCGAAGAAACTATGGATGGATTTTCTCGCCGAGCAACAAATTGGTATTGAATCCTGTCTGACCTCCAATATTCATGTATGGACCGGGTCATCTGACACCATC
183	add	AAGCTTTGCTCGAAGAAACTATGTGATGGATTTTCTCGCCGAGCAACAAATTGGTATTGAATCCTGTCTGACCTCCAATATTCTGTATGGACCGGGTCATCTGACACCATC
184	ade	AAGCTTTGCTCGAAGAAACTATGTTAACCATAAATTTCATCACATTAGCCGGGCTGAATACCAGGAATTGTTAGCCGTTTCCCTGTATGGACCGGGTCATCTGACACCATC
185	ade	AAGCTTTGCTCGAAGAAACTATGTAATGTCTCTATTCTCGACCTGATCAATGGCGGAGAAATTTCCGGCCCAATTGTGATTAATGTATGGACCGGGTCATCTGACACCATC
186	ade	AAGCTTTGCTCGAAGAAACTATGTTAGCCGTTTCCCGTGGCGACGCTGTTGCCGATTATATTATTGATAATGTCTCTATTCTCTGTATGGACCGGGTCATCTGACACCATC
187	ade	AAGCTTTGCTCGAAGAAACTATGCCGTGGCGACGCTGTTGCCGATTATATTATTGATAATGTCTCTATTCTCGACCTGATCAATGTATGGACCGGGTCATCTGACACCATC
188	ade	AAGCTTTGCTCGAAGAAACTATGGTTTGGGTGGTAAAGAACTTAACGCCTATATTACTGCGGGTATTGAAAACTGCCACGAAATGTATGGACCGGGTCATCTGACACCATC
189	adhE	AAGCTTTGCTCGAAGAAACTATGACAACGCCTATAAAGATGAAAAAACCTGTGGTGTTCTGTCTGAAGACGACACTTTTGGTTGTATGGACCGGGTCATCTGACACCATC
190	adhE	AAGCTTTGCTCGAAGAAACTATGCGAATCCGGCATGGGTATCGTCGAAGATAAAGTGATCAAAAACCACTTTGCTTCTGAATGTATGGACCGGGTCATCTGACACCATC
191	adhE	AAGCTTTGCTCGAAGAAACTATGATCACTTCCGTACTGAAAGCAGCAGGCGTTGAAACTGAAGTCTTCTTCGAAGTAGAAGTGTATGGACCGGGTCATCTGACACCATC
192	adhE	AAGCTTTGCTCGAAGAAACTATGGATATCAAACGTGCAGTTGCATCTGTACTGATGTCCAAAACCTTCGACAACGGCGTAATCTGTATGGACCGGGTCATCTGACACCATC
193	adhE	AAGCTTTGCTCGAAGAAACTATGAAAAAGCCCAGCGTGAATATGCCAGTTTCACTCAAGAGCAAGTAGACAAAATCTTCCGTGTATGGACCGGGTCATCTGACACCATC
194	adhP	AAGCTTTGCTCGAAGAAACTATGTGGAGTGTTGTGGTGTATGTCATACCGATCTTCATGTTAAGAATGGCGATTTTGGTGACATGTATGGACCGGGTCATCTGACACCATC
195	adhP	AAGCTTTGCTCGAAGAAACTATGATGTCATACCGATCTTCATGTTAAGAATGGCGATTTTGGTGACAAAACCGGCGTAATTCTTGTATGGACCGGGTCATCTGACACCATC
196	adhP	AAGCTTTGCTCGAAGAAACTATGGTCATACCGATCTTCATGTTAAGAATGGCGATTTTGGTGACAAAACCGGCGTAATTCTGGTGTATGGACCGGGTCATCTGACACCATC
197	adhP	AAGCTTTGCTCGAAGAAACTATGTGCAGTTGTTACGAAGGATCATCATGTTGACGTTACGTATAAAACACTGCGCTCACTGAATGTATGGACCGGGTCATCTGACACCATC
198	adhP	AAGCTTTGCTCGAAGAAACTATGGAATGTCTTTAACGCCAAAGTGATCGCCATTGATGTCAATGATGAGCAGTTAAAACTGGCTGTATGGACCGGGTCATCTGACACCATC
199	adiA	AAGCTTTGCTCGAAGAAACTATGATGGTTTTGCCATTCTCTCTTCAAACGAAGCCATTGACTGCCTGATGTTCAGCTATCAAATGTATGGACCGGGTCATCTGACACCATC
200	adiA	AAGCTTTGCTCGAAGAAACTATGAATGGAACATCCGGACGAACATCAAAACGTCAGACAATTGATCGGTAAGCTTCATGAGTGTATGGACCGGGTCATCTGACACCATC
201	adiA	AAGCTTTGCTCGAAGAAACTATGGTCTGGCAGATGCTTTAAGCCAGCAAAATGTTACCGTGATTAAATCCACCTCCTTTGATGTATGGACCGGGTCATCTGACACCATC
202	adiA	AAGCTTTGCTCGAAGAAACTATGATAACGATGTCGTGGTCGTTGACCGTAACTGCCATAAATCCATCGAACAAGGTTTGATGTGTATGGACCGGGTCATCTGACACCATC
203	adiA	AAGCTTTGCTCGAAGAAACTATGGATAAAAACAGTCCGCAAGTAAGTTATTTACGCTCGCTGCAATCCTGGGACCACCATTTCTGTATGGACCGGGTCATCTGACACCATC
204	adiC	AAGCTTTGCTCGAAGAAACTATGTAAGTTACTTCTTCCCGATTCTGAAAGATCCATTGGTATTAACCATCACCTGCGTCGTGGTGTATGGACCGGGTCATCTGACACCATC
205	adiC	AAGCTTTGCTCGAAGAAACTATGGCAATATCGCCATGGTGGTCATTGGCGTAGGATATTTAAGTTACTTCTTCCCGATTCTGATGTATGGACCGGGTCATCTGACACCATC
206	adiC	AAGCTTTGCTCGAAGAAACTATGGTATGCGCTGAATTACAACCGGCTACATAAAAACCCGTATCCCTTAGATGCACCAATAAGTGTATGGACCGGGTCATCTGACACCATC
207	adiC	AAGCTTTGCTCGAAGAAACTATGATGTATGCGCTGAATTACAACCGGCTACATAAAAACCCGTATCCCTTAGATGCACCAATATGTATGGACCGGGTCATCTGACACCATC
208	adiC	AAGCTTTGCTCGAAGAAACTATGTGTATGCGCTGAATTACAACCGGCTACATAAAAACCCGTATCCCTTAGATGCACCAATAATGTATGGACCGGGTCATCTGACACCATC
209	adiY	AAGCTTTGCTCGAAGAAACTATGAAGATTACCTCCGGTTTCTGAATAAAGATCTCTCGCAAATACCAGTATGGCAACGTAGCGTGTATGGACCGGGTCATCTGACACCATC
210	adiY	AAGCTTTGCTCGAAGAAACTATGACACGCGCATTATTATTCACGGTGCTATCCCGTTTTCTCGACAGTAAAAAATTCGTTTCATGTATGGACCGGGTCATCTGACACCATC
211	adiY	AAGCTTTGCTCGAAGAAACTATGCTGCCGCATGCGTTATGCCGTAAATGAATTAATGATGGACGGTAAAAATATCTCTCAGGTTGTATGGACCGGGTCATCTGACACCATC
212	adiY	AAGCTTTGCTCGAAGAAACTATGAAGAAAAAGTTGAAAAGCGAAAACACCAGTTATAGCCAAATAATCACCACCTGCCGCATGTGTATGGACCGGGTCATCTGACACCATC
213	adiY	AAGCTTTGCTCGAAGAAACTATGACAACAGTACGTCGTACTTTATTTCTGTCTTTAAAGACTTCTACGGTATGACGCCGCTGCTGTATGGACCGGGTCATCTGACACCATC
214	adk	AAGCTTTGCTCGAAGAAACTATGGAAGAACTGACTACCCGTAAAGATGATCAGGAAGAGACCGTACGTAAACGTCTGGTTGAATGTATGGACCGGGTCATCTGACACCATC
215	adk	AAGCTTTGCTCGAAGAAACTATGAAGAACTGACTACCCGTAAAGATGATCAGGAAGAGACCGTACGTAAACGTCTGGTTGAATTGTATGGACCGGGTCATCTGACACCATC
216	adk	AAGCTTTGCTCGAAGAAACTATGAACTGACTACCCGTAAAGATGATCAGGAAGAGACCGTACGTAAACGTCTGGTTGAATACCTGTATGGACCGGGTCATCTGACACCATC
217	adk	AAGCTTTGCTCGAAGAAACTATGCTACCCGTAAAGATGATCAGGAAGAGACCGTACGTAAACGTCTGGTTGAATACCATCAGATGTATGGACCGGGTCATCTGACACCATC
218	adk	AAGCTTTGCTCGAAGAAACTATGCCCGTAAAGATGATCAGGAAGAGACCGTACGTAAACGTCTGGTTGAATACCATCAGATGATGTATGGACCGGGTCATCTGACACCATC
219	aegA	AAGCTTTGCTCGAAGAAACTATGAATCAGCCACGTTGATGACAGCATTCAGGTCAATCAGCAAAAGTGTATTGGCTGTAAATCTGTATGGACCGGGTCATCTGACACCATC
220	aegA	AAGCTTTGCTCGAAGAAACTATGTGGGGATTCACTTCGAACTCAATTGTGAAGTGGGTAAAGATGTCTCTTTGGATTCGCTTTTGTATGGACCGGGTCATCTGACACCATC
221	aegA	AAGCTTTGCTCGAAGAAACTATGGATGGGGATTCACTTCGAACTCAATTGTGAAGTGGGTAAAGATGTCTCTTTGGATTCGCTTGTATGGACCGGGTCATCTGACACCATC
222	aegA	AAGCTTTGCTCGAAGAAACTATGCAACATGTCCTGAGCCAACACCATTTTCATCCCCGAATTACGGTTATCAAACATCAACAGTGTATGGACCGGGTCATCTGACACCATC
223	aegA	AAGCTTTGCTCGAAGAAACTATGGGGGATTCACTTCGAACTCAATTGTGAAGTGGGTAAAGATGTCTCTTTGGATTCGCTTTTTGTATGGACCGGGTCATCTGACACCATC
224	aer	AAGCTTTGCTCGAAGAAACTATGTCTGATGTCCACTACCGATCTGCAAAGCTATATCACTCATGCTAATGACACTTTTGTGCATGTATGGACCGGGTCATCTGACACCATC
225	aer	AAGCTTTGCTCGAAGAAACTATGTGATGTCCACTACCGATCTGCAAAGCTATATCACTCATGCTAATGACACTTTTGTGCAGGTGTATGGACCGGGTCATCTGACACCATC
226	aer	AAGCTTTGCTCGAAGAAACTATGGATGTCCACTACCGATCTGCAAAGCTATATCACTCATGCTAATGACACTTTTGTGCAGGTTGTATGGACCGGGTCATCTGACACCATC
227	aer	AAGCTTTGCTCGAAGAAACTATGTATATCACTCATGCTAATGACACTTTTGTGCAGGTGAGCGGCTATACCTTGCAAGAGTTATGTATGGACCGGGTCATCTGACACCATC
228	aer	AAGCTTTGCTCGAAGAAACTATGCTATATCACTCATGCTAATGACACTTTTGTGCAGGTGAGCGGCTATACCTTGCAAGAGTTTGTATGGACCGGGTCATCTGACACCATC
229	aes	AAGCTTTGCTCGAAGAAACTATGACTACCTGTTCTGGACCTTATTTCTGCTGAAATGAAGACCGTTGTGAATACTCTTCAGCCTGTATGGACCGGGTCATCTGACACCATC
230	aes	AAGCTTTGCTCGAAGAAACTATGTGTTCTGGACCTTATTTCTGCTGAAATGAAGACCGTTGTGAATACTCTTCAGCCGGATTTTGTATGGACCGGGTCATCTGACACCATC
231	aes	AAGCTTTGCTCGAAGAAACTATGGCCGTATTACTGTCTGTTTAATAATGATCTCACTCGCGAAGTTCCGCCCTGTTTTATTGCTGTATGGACCGGGTCATCTGACACCATC
232	aes	AAGCTTTGCTCGAAGAAACTATGCTGTTCTGGACCTTATTTCTGCTGAAATGAAGACCGTTGTGAATACTCTTCAGCCGGATTTGTATGGACCGGGTCATCTGACACCATC
233	aes	AAGCTTTGCTCGAAGAAACTATGCCGGAAAACAAACTACCTGTTCTGGACCTTATTTCTGCTGAAATGAAGACCGTTGTGAATTGTATGGACCGGGTCATCTGACACCATC
234	afuB	AAGCTTTGCTCGAAGAAACTATGGATTATTTTCATCTTTGACTGGCTGATCGGTGAATCACGTACCTCCCGTTCAAAAGCCTGTATGGACCGGGTCATCTGACACCATC
235	afuB	AAGCTTTGCTCGAAGAAACTATGCGATTATTTTCATCTTTGACTGGCTGATCGGTGAATCACGTACCTCCCGTTCAAAAGCTGTATGGACCGGGTCATCTGACACCATC
236	afuB	AAGCTTTGCTCGAAGAAACTATGGCGATTATTTTCATCTTTGACTGGCTGATCGGTGAATCACGTACCTCCCGTTCAAAAGTGTATGGACCGGGTCATCTGACACCATC
237	afuB	AAGCTTTGCTCGAAGAAACTATGCATTCTGATCGTGGTGATGCTGGCGATTATTTTCATCTTTGACTGGCTGATCGGTGAATCTGTATGGACCGGGTCATCTGACACCATC
238	afuB	AAGCTTTGCTCGAAGAAACTATGGATTGCCTACGGTTCCATTCTGATCGTGGTGATGCTGGCGATTATTTTCATCTTTGACTGTGTATGGACCGGGTCATCTGACACCATC
239	afuC	AAGCTTTGCTCGAAGAAACTATGTGACTCAGAAAAATTTCGTTGAACTGCGCAACGTCACTAAACGATTTGGCAGTAATACGGTGTATGGACCGGGTCATCTGACACCATC
240	afuC	AAGCTTTGCTCGAAGAAACTATGGACTCAGAAAAATTTCGTTGAACTGCGCAACGTCACTAAACGATTTGGCAGTAATACGGTTGTATGGACCGGGTCATCTGACACCATC
241	afuC	AAGCTTTGCTCGAAGAAACTATGCGTTGAACTGCGCAACGTCACTAAACGATTTGGCAGTAATACGGTAATCGACAATATCAATGTATGGACCGGGTCATCTGACACCATC
242	afuC	AAGCTTTGCTCGAAGAAACTATGACTCAGAAAAATTTCGTTGAACTGCGCAACGTCACTAAACGATTTGGCAGTAATACGGTATGTATGGACCGGGTCATCTGACACCATC
243	afuC	AAGCTTTGCTCGAAGAAACTATGTTGAACTGCGCAACGTCACTAAACGATTTGGCAGTAATACGGTAATCGACAATATCAACCTGTATGGACCGGGTCATCTGACACCATC
244	agaA	AAGCTTTGCTCGAAGAAACTATGCTGGATAGCGGGCTACATGTGCAACAAATCTGGATTCAGGGTCAATTAGCTTCGTTTTGATGTATGGACCGGGTCATCTGACACCATC
245	agaA	AAGCTTTGCTCGAAGAAACTATGGGATAGCGGGCTACATGTGCAACAAATCTGGATTCAGGGTCAATTAGCTTCGTTTTGATGTATGGACCGGGTCATCTGACACCATC
246	agaA	AAGCTTTGCTCGAAGAAACTATGCTGGATAGCGGGCTACATGTGCAACAAATCTGGATTCAGGGTCAATTAGCTTCGTTTTTGTATGGACCGGGTCATCTGACACCATC
247	agaA	AAGCTTTGCTCGAAGAAACTATGGGATAGCGGGCTACATGTGCAACAAATCTGGATTCAGGGTCAATTAGCTTCGTTTTTGTATGGACCGGGTCATCTGACACCATC
248	agaA	AAGCTTTGCTCGAAGAAACTATGTGGATAGCGGGCTACATGTGCAACAAATCTGGATTCAGGGTCAATTAGCTTCGTTTTGTGTATGGACCGGGTCATCTGACACCATC
249	agaB	AAGCTTTGCTCGAAGAAACTATGGTTTTATTAAACAACGTGGCGTGAATGTTTTCATTCAGGACGTCCCTGGCGATCAAAAAGTGTATGGACCGGGTCATCTGACACCATC
250	agaB	AAGCTTTGCTCGAAGAAACTATGTGCATTTCTCGGAAGGGAAAAAGCAAATCAGCAGTAAAGTTTATGTCGATGACCAGGATCTGTATGGACCGGGTCATCTGACACCATC
251	agaB	AAGCTTTGCTCGAAGAAACTATGGTGCAAATCTGCTGGTAGTCGTGGATGATGTTGTCGCTAACGATGATATTCAACAGAAATTGTATGGACCGGGTCATCTGACACCATC
252	agaB	AAGCTTTGCTCGAAGAAACTATGCGTACGCCACAAACGGTACGTAAATTGGTAGAAGGTGGTATTGACCTGAAAGATGTCAACTGTATGGACCGGGTCATCTGACACCATC
253	agaB	AAGCTTTGCTCGAAGAAACTATGGACCAGTCCAAATATTCTCTTAACCCGTATTGATAACCGTCTGGTTCACGGTCAGGTTGTGTATGGACCGGGTCATCTGACACCATC
254	agaC	AAGCTTTGCTCGAAGAAACTATGCTATTCCGCTTTCTCATTATTTATGACCAAAGCCGATAAATGCGCGAAAGAGGCGGATACTGTATGGACCGGGTCATCTGACACCATC
255	agaC	AAGCTTTGCTCGAAGAAACTATGTTCTGGGGATTGATTTTTGGCTGGAAGCCTTATTTTTATTCCGCCCGATAATCGTTTGTATGTATGGACCGGGTCATCTGACACCATC
256	agaC	AAGCTTTGCTCGAAGAAACTATGTTCTTCTATTCCGCTTTCTCATTATTTATGACCAAAGCCGATAAATGCGCGAAAGAGGCGTGTATGGACCGGGTCATCTGACACCATC
257	agaC	AAGCTTTGCTCGAAGAAACTATGATTTTTATTCCGCCCGATAATCGTTTGTACCCTAACTGGCGCTATTCTCGGTGATATTCATGTATGGACCGGGTCATCTGACACCATC
258	agaC	AAGCTTTGCTCGAAGAAACTATGCTTGGCCTGCCGTTTAGTTTGTTAATGCAGTACGTCATTCTGTTCTTCTATTCCGCTTTCTGTATGGACCGGGTCATCTGACACCATC
259	agaD	AAGCTTTGCTCGAAGAAACTATGGGCGATGAAAGATAACCTCGAATTTATTAATACCCACCCGAATCTGGTCGGATTCCTGATTGTATGGACCGGGTCATCTGACACCATC
260	agaD	AAGCTTTGCTCGAAGAAACTATGACCCGAATCTGGTCGGATTCCTGATGGGGTTATTAATTTCGATGGAAGAAAAAGGAGAAATGTATGGACCGGGTCATCTGACACCATC
261	agaD	AAGCTTTGCTCGAAGAAACTATGCTTCGATAAAGTCTTCCCGAACATTTTACCGATGGCCTACACCCTGCTGATGTATTACTTTGTATGGACCGGGTCATCTGACACCATC
262	agaD	AAGCTTTGCTCGAAGAAACTATGGATAAAGTCTTCCCGAACATTTTACCGATGGCCTACACCCTGCTGATGTATTACTTCCTGTGTATGGACCGGGTCATCTGACACCATC
263	agaD	AAGCTTTGCTCGAAGAAACTATGGGGGTTATTAATTTCGATGGAAGAAAAAGGAGAAAACCGCGACACCATTAAAGGCCTCAATGTATGGACCGGGTCATCTGACACCATC
264	agaI	AAGCTTTGCTCGAAGAAACTATGAAGGAATTTCATCCTGTGCAAACCCTTCAGCAAGTTGAAAACTATACGGCGTTAAGTGAATGTATGGACCGGGTCATCTGACACCATC
265	agaI	AAGCTTTGCTCGAAGAAACTATGTTACTGACGTATCATTATCTGGTAGAAAAAATCCACCAGCAGCAGGTTGATGTCAGCCAGTGTATGGACCGGGTCATCTGACACCATC
266	agaI	AAGCTTTGCTCGAAGAAACTATGAACCCTTCAGCAAGTTGAAAACTATACGGCGTTAAGTGAACGTGCCAGCGAATATTTATTTGTATGGACCGGGTCATCTGACACCATC
267	agaI	AAGCTTTGCTCGAAGAAACTATGAAACCCTTCAGCAAGTTGAAAACTATACGGCGTTAAGTGAACGTGCCAGCGAATATTTATTGTATGGACCGGGTCATCTGACACCATC
268	agaI	AAGCTTTGCTCGAAGAAACTATGGTGGTGCCTCTTTACTTAAGGAATTTCATCCTGTGCAAACCCTTCAGCAAGTTGAAAACTTGTATGGACCGGGTCATCTGACACCATC
269	agaR	AAGCTTTGCTCGAAGAAACTATGCATTGATACTCAACGTATCGACATGATCATTGTTGATGAAGGCATTCCTGCGGATAGCCTTGTATGGACCGGGTCATCTGACACCATC
270	agaR	AAGCTTTGCTCGAAGAAACTATGAACGGATCATCGTGGTCACCGATTCCAGTAAGTTCAATCGTTCCAGTTTACATAAGATCATGTATGGACCGGGTCATCTGACACCATC
271	agaR	AAGCTTTGCTCGAAGAAACTATGACGGATCATCGTGGTCACCGATTCCAGTAAGTTCAATCGTTCCAGTTTACATAAGATCATTGTATGGACCGGGTCATCTGACACCATC
272	agaR	AAGCTTTGCTCGAAGAAACTATGGGAACGGATCATCGTGGTCACCGATTCCAGTAAGTTCAATCGTTCCAGTTTACATAAGATGTATGGACCGGGTCATCTGACACCATC
273	agaR	AAGCTTTGCTCGAAGAAACTATGATTGATACTCAACGTATCGACATGATCATTGTTGATGAAGGCATTCCTGCGGATAGCCTTGTATGGACCGGGTCATCTGACACCATC
274	agaS	AAGCTTTGCTCGAAGAAACTATGCAATAACTTCCTTGAACCGTTACTGCGCAAAGAGAATCTGCGGATCATCCTGACCTGTATGGACCGGGTCATCTGACACCATC
275	agaS	AAGCTTTGCTCGAAGAAACTATGGCTCAATAACTTCCTTGAACCGTTACTGCGCAAAGAGAATCTGCGGATCATCCTGACTGTATGGACCGGGTCATCTGACACCATC
276	agaS	AAGCTTTGCTCGAAGAAACTATGTTTTATGATTCTCCAACCGGATTCCGTCATGGACCAAAATCGCTGGTCGATGACGAAACTGTATGGACCGGGTCATCTGACACCATC
277	agaS	AAGCTTTGCTCGAAGAAACTATGGCTCAATAACTTCCTTGAACCGTTACTGCGCAAAGAGAATCTGCGGATCATCCTGTGTATGGACCGGGTCATCTGACACCATC
278	agaS	AAGCTTTGCTCGAAGAAACTATGCTTTTATGATTCTCCAACCGGATTCCGTCATGGACCAAAATCGCTGGTCGATGACTGTATGGACCGGGTCATCTGACACCATC
279	agaV	AAGCTTTGCTCGAAGAAACTATGAATATTGTTTTAAGCCGGATTGATGAACGCTTGATTCACGGTCAGGTCGGCGTTCAATGTGTATGGACCGGGTCATCTGACACCATC
280	agaV	AAGCTTTGCTCGAAGAAACTATGGAATCGCATTAACGTTGGCAATATGCACTACGCCAATGGCAAACAACAAATCGCCAAAACTGTATGGACCGGGTCATCTGACACCATC
281	agaV	AAGCTTTGCTCGAAGAAACTATGCAAATATTGTTTTAAGCCGGATTGATGAACGCTTGATTCACGGTCAGGTCGGCGTTCAATGTATGGACCGGGTCATCTGACACCATC
282	agaV	AAGCTTTGCTCGAAGAAACTATGCAAATATTGTTTTAAGCCGGATTGATGAACGCTTGATTCACGGTCAGGTCGGCGTTCTGTATGGACCGGGTCATCTGACACCATC
283	agaV	AAGCTTTGCTCGAAGAAACTATGATTAACGTTGGCAATATGCACTACGCCAATGGCAAACAACAAATCGCCAAAACGGTTTCTGTATGGACCGGGTCATCTGACACCATC
284	agaW	AAGCTTTGCTCGAAGAAACTATGCATTATCGCCTTTATCGCTGGCCTGGATATGTTTAACGGCCTAACCCATATGCACCTGTATGGACCGGGTCATCTGACACCATC
285	agaW	AAGCTTTGCTCGAAGAAACTATGTTATCGCCTTTATCGCTGGCCTGGATATGTTTAACGGCCTAACCCATATGCACTGTATGGACCGGGTCATCTGACACCATC
286	agaW	AAGCTTTGCTCGAAGAAACTATGATTATCGCCTTTATCGCTGGCCTGGATATGTTTAACGGCCTAACCCATATGCATGTATGGACCGGGTCATCTGACACCATC
287	agaW	AAGCTTTGCTCGAAGAAACTATGGTTGGGCATTATCGCCTTTATCGCTGGCCTGGATATGTTTAACGGCCTAACCCATATGTGTATGGACCGGGTCATCTGACACCATC
288	agaW	AAGCTTTGCTCGAAGAAACTATGGGCATTATCGCCTTTATCGCTGGCCTGGATATGTTTAACGGCCTAACCCATATTGTATGGACCGGGTCATCTGACACCATC
289	agp	AAGCTTTGCTCGAAGAAACTATGGTAAAGAGAAACAACAGTGTTCGCTGGTGGATGGCAAAAATACCTTTAGCGCCAAGTATCTGTATGGACCGGGTCATCTGACACCATC
290	agp	AAGCTTTGCTCGAAGAAACTATGCTGATGGTTTCTGCCCGATGGATAAGTTTGATAGCGTGTTGAATGAAGCGGTGAAATAATGTATGGACCGGGTCATCTGACACCATC
291	agp	AAGCTTTGCTCGAAGAAACTATGCAACTCGCTGGTAGATGCGTTTACTTTGCAATATTACGAAGGTTTTCCGATGGATCAGGTGTATGGACCGGGTCATCTGACACCATC
292	agp	AAGCTTTGCTCGAAGAAACTATGTTACTTTGCAATATTACGAAGGTTTTCCGATGGATCAGGTGGCCTGGGGAGAAATCAAATTGTATGGACCGGGTCATCTGACACCATC
293	agp	AAGCTTTGCTCGAAGAAACTATGACCGACAGCTACCAGCTACTGGAAAAAATCGTTAACTATAAAGATTCCCCTGCCTGTAATGTATGGACCGGGTCATCTGACACCATC
294	ahpC	AAGCTTTGCTCGAAGAAACTATGCTACGAAGAACTGCAGAAACTGGGCGTAGACGTATACGCAGTATCTACCGATACTCACTTTGTATGGACCGGGTCATCTGACACCATC
295	ahpC	AAGCTTTGCTCGAAGAAACTATGAAAACCAGGCATTCAAAAACGGCGAATTCATCGAAATCACCGAAAAAGATACCGAAGGTGTATGGACCGGGTCATCTGACACCATC
296	ahpC	AAGCTTTGCTCGAAGAAACTATGGAAGAACTGCAGAAACTGGGCGTAGACGTATACGCAGTATCTACCGATACTCACTTCATGTATGGACCGGGTCATCTGACACCATC
297	ahpC	AAGCTTTGCTCGAAGAAACTATGCTACGAAGAACTGCAGAAACTGGGCGTAGACGTATACGCAGTATCTACCGATACTCACTGTATGGACCGGGTCATCTGACACCATC
298	ahpC	AAGCTTTGCTCGAAGAAACTATGCACTACGAAGAACTGCAGAAACTGGGCGTAGACGTATACGCAGTATCTACCGATACTCTGTATGGACCGGGTCATCTGACACCATC
299	ahpF	AAGCTTTGCTCGAAGAAACTATGTGGAGCAGATTCGCCATATTGACGGTGATTTTGAATTCGAAACCTATTACTCGCTCTCTTTGTATGGACCGGGTCATCTGACACCATC
300	ahpF	AAGCTTTGCTCGAAGAAACTATGAGATCCTCGATACCGTTGATATCGAAAACTACATTTCTGTACCGAAGACTGAAGGGCAGATGTATGGACCGGGTCATCTGACACCATC
301	ahpF	AAGCTTTGCTCGAAGAAACTATGTGTTGGCTGAAATCGCAGAACTGTCAGACAAAGTCACCTTTAAAGAAGATAACAGCTTGCTGTATGGACCGGGTCATCTGACACCATC
302	ahpF	AAGCTTTGCTCGAAGAAACTATGATTCGCCATATTGACGGTGATTTTGAATTCGAAACCTATTACTCGCTCTCTTGCCACAACTGTATGGACCGGGTCATCTGACACCATC
303	ahpF	AAGCTTTGCTCGAAGAAACTATGGTTGGCTGAAATCGCAGAACTGTCAGACAAAGTCACCTTTAAAGAAGATAACAGCTTGCCTGTATGGACCGGGTCATCTGACACCATC
304	aidB	AAGCTTTGCTCGAAGAAACTATGCATTTTCGCTGGCGATTTATCATGCACATCAACGCCATGTTTTTGGTAATCCATTGATCCTGTATGGACCGGGTCATCTGACACCATC
305	aidB	AAGCTTTGCTCGAAGAAACTATGCATGTTTTTGGTAATCCATTGATCCAACAGCCCCTTATGCGTCATGTCTTAAGTCGCATGTGTATGGACCGGGTCATCTGACACCATC
306	aidB	AAGCTTTGCTCGAAGAAACTATGGATTTATCATGCACATCAACGCCATGTTTTTGGTAATCCATTGATCCAACAGCCCCTTATTGTATGGACCGGGTCATCTGACACCATC
307	aidB	AAGCTTTGCTCGAAGAAACTATGCGTATACGACTTATTGTCGGAAGCATTTGTGGAAGTGAAAGGGCAGGATCGCTATTTTGATGTATGGACCGGGTCATCTGACACCATC
308	aidB	AAGCTTTGCTCGAAGAAACTATGGTATACGACTTATTGTCGGAAGCATTTGTGGAAGTGAAAGGGCAGGATCGCTATTTTGATTGTATGGACCGGGTCATCTGACACCATC
309	ais	AAGCTTTGCTCGAAGAAACTATGCCTGGTTTTCAGCGGGTAAAAAATTGACGGTAGATAAACGACTTCTTCAGTGCGGTAATGTGTATGGACCGGGTCATCTGACACCATC
310	ais	AAGCTTTGCTCGAAGAAACTATGTGGTTTAGTCATGCATGTGGAAAAAGGCAAAGTTTATCTGGATGGGGAATTCGTTAACCATGTATGGACCGGGTCATCTGACACCATC
311	ais	AAGCTTTGCTCGAAGAAACTATGAAGCGTGACGCGACATTTAAACCTGATTATCTGGATGGTTTAGTCATGCATGTGGAAAAATGTATGGACCGGGTCATCTGACACCATC
312	ais	AAGCTTTGCTCGAAGAAACTATGTGACGCGACATTTAAACCTGATTATCTGGATGGTTTAGTCATGCATGTGGAAAAAGGCAATGTATGGACCGGGTCATCTGACACCATC
313	ais	AAGCTTTGCTCGAAGAAACTATGATCTGGATGGTTTAGTCATGCATGTGGAAAAAGGCAAAGTTTATCTGGATGGGGAATTCGTGTATGGACCGGGTCATCTGACACCATC
314	alaS	AAGCTTTGCTCGAAGAAACTATGATCTTTCCAGTAAGGCAATTGATGTTAATGGTGTTAAGCTGTTGGTTAGCGAGCTTAGCGTGTATGGACCGGGTCATCTGACACCATC
315	alaS	AAGCTTTGCTCGAAGAAACTATGCGATTACAACGCAATGATCCGTGTTGACAGTGCATCTGAATTTAAAGGCTATGACCATCTTGTATGGACCGGGTCATCTGACACCATC
316	alaS	AAGCTTTGCTCGAAGAAACTATGCAGGAGAGCGCAAATCTTTCCAGTAAGGCAATTGATGTTAATGGTGTTAAGCTGTTGGTTTGTATGGACCGGGTCATCTGACACCATC
317	alaS	AAGCTTTGCTCGAAGAAACTATGGAGCGCAAATCTTTCCAGTAAGGCAATTGATGTTAATGGTGTTAAGCTGTTGGTTAGCGATGTATGGACCGGGTCATCTGACACCATC
318	alaS	AAGCTTTGCTCGAAGAAACTATGAGCGCAAATCTTTCCAGTAAGGCAATTGATGTTAATGGTGTTAAGCTGTTGGTTAGCGAGTGTATGGACCGGGTCATCTGACACCATC
319	aldA	AAGCTTTGCTCGAAGAAACTATGAGATGGTAAACATGGCTTGCATGAATATCTGCAGACCCAGGTGGTTTATTTACAGTCTTTGTATGGACCGGGTCATCTGACACCATC
320	aldA	AAGCTTTGCTCGAAGAAACTATGGTTTATGTACAGAAAGGCATTTATGATCAGTTCGTCAATCGGCTGGGTGAAGCGATGCTGTATGGACCGGGTCATCTGACACCATC
321	aldA	AAGCTTTGCTCGAAGAAACTATGGAAAAACATCACCAAAGTGTGTCTGGAATTGGGGGGTAAAGCACCAGCTATCGTAATGTGTATGGACCGGGTCATCTGACACCATC
322	aldA	AAGCTTTGCTCGAAGAAACTATGTATGTATATCGATGGACAGTTTGTTACCTGGCGTGGAGACGCATGGATTGATGTGGTAATGTATGGACCGGGTCATCTGACACCATC
323	aldA	AAGCTTTGCTCGAAGAAACTATGGATATTATTATCCGCCGACATTGCTGCTGGATGTTCGCCAGGAAATGTCGATTATGCATGTGTATGGACCGGGTCATCTGACACCATC
324	aldB	AAGCTTTGCTCGAAGAAACTATGTATCTTCTTTGCTGATGTGATGGATGAAGAAGATGCCTTTTTCGATAAAGCGCTGGAAGGTGTATGGACCGGGTCATCTGACACCATC
325	aldB	AAGCTTTGCTCGAAGAAACTATGCGCCAAATATCTTCTTTGCTGATGTGATGGATGAAGAAGATGCCTTTTTCGATAAAGCGCTGTATGGACCGGGTCATCTGACACCATC
326	aldB	AAGCTTTGCTCGAAGAAACTATGCAGGTTTCTCACGGGCAACTGGAAACCATCCTCAACTACATTGATATCGGTAAAAAAGAGTGTATGGACCGGGTCATCTGACACCATC
327	aldB	AAGCTTTGCTCGAAGAAACTATGGCAGGTTTCTCACGGGCAACTGGAAACCATCCTCAACTACATTGATATCGGTAAAAAAGTGTATGGACCGGGTCATCTGACACCATC
328	aldB	AAGCTTTGCTCGAAGAAACTATGATCTTCTTTGCTGATGTGATGGATGAAGAAGATGCCTTTTTCGATAAAGCGCTGGAAGGTGTATGGACCGGGTCATCTGACACCATC
329	alkA	AAGCTTTGCTCGAAGAAACTATGTGACTGCTATTCCGGATATAGCCCGCCATACTCTGCACATAAATTTAAGTGCAGGTTTAGTGTATGGACCGGGTCATCTGACACCATC
330	alkA	AAGCTTTGCTCGAAGAAACTATGTATTCCGGATATAGCCCGCCATACTCTGCACATAAATTTAAGTGCAGGTTTAGAACCTGTTGTATGGACCGGGTCATCTGACACCATC
331	alkA	AAGCTTTGCTCGAAGAAACTATGGCTATTCCGGATATAGCCCGCCATACTCTGCACATAAATTTAAGTGCAGGTTTAGAACCTTGTATGGACCGGGTCATCTGACACCATC
332	alkA	AAGCTTTGCTCGAAGAAACTATGATTCCGGATATAGCCCGCCATACTCTGCACATAAATTTAAGTGCAGGTTTAGAACCTGTTTGTATGGACCGGGTCATCTGACACCATC
333	alkA	AAGCTTTGCTCGAAGAAACTATGGTGACTGCTATTCCGGATATAGCCCGCCATACTCTGCACATAAATTTAAGTGCAGGTTTATGTATGGACCGGGTCATCTGACACCATC
334	alkB	AAGCTTTGCTCGAAGAAACTATGCAAACAAATAAACCGTGGCCCGCCATGCCACAGAGTTTTCATAATTTATGTCAACGTGTGTATGGACCGGGTCATCTGACACCATC
335	alkB	AAGCTTTGCTCGAAGAAACTATGGATTTTTCAATTTGGCGGCCTGAAACGAAATGATCCGCTCAAACGTTTGTTGTTGGAACTGTATGGACCGGGTCATCTGACACCATC
336	alkB	AAGCTTTGCTCGAAGAAACTATGCATTGATCCGCAAACAAATAAACCGTGGCCCGCCATGCCACAGAGTTTTCATAATTTATGTGTATGGACCGGGTCATCTGACACCATC
337	alkB	AAGCTTTGCTCGAAGAAACTATGTAATTTTACGGCGTTTTGCTTTTAACGCTGCGGAGCAACTGATCCGCGATATTAATGATGTATGGACCGGGTCATCTGACACCATC
338	alkB	AAGCTTTGCTCGAAGAAACTATGCAAACAAATAAACCGTGGCCCGCCATGCCACAGAGTTTTCATAATTTATGTCAACGTTGTATGGACCGGGTCATCTGACACCATC
339	allA	AAGCTTTGCTCGAAGAAACTATGGAAACTTCAGGTATTACCGTTAAGTCAGGAAGCCTTTAGTGCTTATGGCGACGTAATCGATGTATGGACCGGGTCATCTGACACCATC
340	allA	AAGCTTTGCTCGAAGAAACTATGTAGTGCTTATGGCGACGTAATCGAAACGCAGCAACGGGATTTTTTCCATATTAACAATGGTGTATGGACCGGGTCATCTGACACCATC
341	allA	AAGCTTTGCTCGAAGAAACTATGAACTTCAGGTATTACCGTTAAGTCAGGAAGCCTTTAGTGCTTATGGCGACGTAATCGAAATGTATGGACCGGGTCATCTGACACCATC
342	allA	AAGCTTTGCTCGAAGAAACTATGAAACTTCAGGTATTACCGTTAAGTCAGGAAGCCTTTAGTGCTTATGGCGACGTAATCGAATGTATGGACCGGGTCATCTGACACCATC
343	allA	AAGCTTTGCTCGAAGAAACTATGTTCAGGTATTACCGTTAAGTCAGGAAGCCTTTAGTGCTTATGGCGACGTAATCGAAACGTGTATGGACCGGGTCATCTGACACCATC
344	allB	AAGCTTTGCTCGAAGAAACTATGTAAAAACGGCACCGTTATTTTAGAAAACGAAGCTCGCGTTGTAGATATCGCCGTTAAAGGTGTATGGACCGGGTCATCTGACACCATC
345	allB	AAGCTTTGCTCGAAGAAACTATGTTCGTCTTCATTCAGCCGAATAGCAGCTATGTTCTTACCAATGACGATCTGGAATATCGCTGTATGGACCGGGTCATCTGACACCATC
346	allB	AAGCTTTGCTCGAAGAAACTATGTTACTTGTGAATCCTGCCCGCATTACTTTGTACTGGATACCGATCAGTTCGAAGAAATCGTGTATGGACCGGGTCATCTGACACCATC
347	allB	AAGCTTTGCTCGAAGAAACTATGCACCGTTATTTTAGAAAACGAAGCTCGCGTTGTAGATATCGCCGTTAAAGGCGGAAAAATTGTATGGACCGGGTCATCTGACACCATC
348	allB	AAGCTTTGCTCGAAGAAACTATGTTCATTCAGCCGAATAGCAGCTATGTTCTTACCAATGACGATCTGGAATATCGCCACAAATGTATGGACCGGGTCATCTGACACCATC
349	allC	AAGCTTTGCTCGAAGAAACTATGTTTGCGATGAAATGGACATTGGTATTGATATCGATTTATGGATGGACGAAGAACCCGTGCTGTATGGACCGGGTCATCTGACACCATC
350	allC	AAGCTTTGCTCGAAGAAACTATGCAGTTAGAAAACGACATGCGGGCGATTTGCGATGAAATGGACATTGGTATTGATATCGATTGTATGGACCGGGTCATCTGACACCATC
351	allC	AAGCTTTGCTCGAAGAAACTATGAATATCTGTGATGCCAAAGGAAATAGTTTTGTCGATGCGATGAAGGCTTGCGGATTTACTTGTATGGACCGGGTCATCTGACACCATC
352	allC	AAGCTTTGCTCGAAGAAACTATGTGGACATTGGTATTGATATCGATTTATGGATGGACGAAGAACCCGTGCCGATGAATAAGGTGTATGGACCGGGTCATCTGACACCATC
353	allC	AAGCTTTGCTCGAAGAAACTATGAAACGACATGCGGGCGATTTGCGATGAAATGGACATTGGTATTGATATCGATTTATGGATTGTATGGACCGGGTCATCTGACACCATC
354	allD	AAGCTTTGCTCGAAGAAACTATGGTTTTAATCAGGTTTATTATCCCGGACAGGATCAGGATATTAAACAACGCAAAGCCGCCGTGTATGGACCGGGTCATCTGACACCATC
355	allD	AAGCTTTGCTCGAAGAAACTATGCGGTTTTAATCAGGTTTATTATCCCGGACAGGATCAGGATATTAAACAACGCAAAGCCGCTGTATGGACCGGGTCATCTGACACCATC
356	allD	AAGCTTTGCTCGAAGAAACTATGCCGGTTTTAATCAGGTTTATTATCCCGGACAGGATCAGGATATTAAACAACGCAAAGCCGTGTATGGACCGGGTCATCTGACACCATC
357	allD	AAGCTTTGCTCGAAGAAACTATGCGCCCGGTTTTAATCAGGTTTATTATCCCGGACAGGATCAGGATATTAAACAACGCAAAGTGTATGGACCGGGTCATCTGACACCATC
358	allD	AAGCTTTGCTCGAAGAAACTATGTATTAAACAACGCAAAGCCGCCGTCGAAGGCATCGAAATTGTTGATGATATTTACCAGTATGTATGGACCGGGTCATCTGACACCATC
359	allR	AAGCTTTGCTCGAAGAAACTATGAGAGCATGTTGTAGGTCTGAATTGCATAGCTTCAGCAATTTACGATGATGTCGGTAGTGTTGTATGGACCGGGTCATCTGACACCATC
360	allR	AAGCTTTGCTCGAAGAAACTATGTTGCGATTCTGCAATATTTGGAAAAAAGTGGGGGAAGTTCGTCGGTTAGCGATATTTCTCTGTATGGACCGGGTCATCTGACACCATC
361	allR	AAGCTTTGCTCGAAGAAACTATGATTTGGAAAAAAGTGGGGGAAGTTCGTCGGTTAGCGATATTTCTCTCAATCTGGATTTGCTGTATGGACCGGGTCATCTGACACCATC
362	allR	AAGCTTTGCTCGAAGAAACTATGCGATCCGTAACGGCAATGAAGCGGTATTAATTGGTCAGTTAGAGTGTAAATCGATGGTCATGTATGGACCGGGTCATCTGACACCATC
363	allR	AAGCTTTGCTCGAAGAAACTATGCCGTAACGGCAATGAAGCGGTATTAATTGGTCAGTTAGAGTGTAAATCGATGGTCAGGATTGTATGGACCGGGTCATCTGACACCATC
364	alpA	AAGCTTTGCTCGAAGAAACTATGTGTCGGATGGATTGAGGCCGAGATTGATGAGTGGTTATCACAACGCTGTAAACTTATTTTGTATGGACCGGGTCATCTGACACCATC
365	alpA	AAGCTTTGCTCGAAGAAACTATGCTGTCGGATGGATTGAGGCCGAGATTGATGAGTGGTTATCACAACGCTGTAAACTTATTTGTATGGACCGGGTCATCTGACACCATC
366	alpA	AAGCTTTGCTCGAAGAAACTATGGTCGGATGGATTGAGGCCGAGATTGATGAGTGGTTATCACAACGCTGTAAACTTATTTGTGTATGGACCGGGTCATCTGACACCATC
367	alpA	AAGCTTTGCTCGAAGAAACTATGATCTGTCGGATGGATTGAGGCCGAGATTGATGAGTGGTTATCACAACGCTGTAAACTTATTGTATGGACCGGGTCATCTGACACCATC
368	alpA	AAGCTTTGCTCGAAGAAACTATGTCTGTCGGATGGATTGAGGCCGAGATTGATGAGTGGTTATCACAACGCTGTAAACTTATTTGTATGGACCGGGTCATCTGACACCATC
369	alr	AAGCTTTGCTCGAAGAAACTATGGAGAAACAACTCGCTATCTTTAATACCTTTTGCGAAGGCAAACCTGGTCAACGTTCCATTGTATGGACCGGGTCATCTGACACCATC
370	alr	AAGCTTTGCTCGAAGAAACTATGGATGAACCAAAATGTGGCGCAACCGAGAAACAACTCGCTATCTTTAATACCTTTTGCGAATGTATGGACCGGGTCATCTGACACCATC
371	alr	AAGCTTTGCTCGAAGAAACTATGAGAAACAACTCGCTATCTTTAATACCTTTTGCGAAGGCAAACCTGGTCAACGTTCCATTTGTATGGACCGGGTCATCTGACACCATC
372	alr	AAGCTTTGCTCGAAGAAACTATGATGAACCAAAATGTGGCGCAACCGAGAAACAACTCGCTATCTTTAATACCTTTTGCGAAGTGTATGGACCGGGTCATCTGACACCATC
373	alr	AAGCTTTGCTCGAAGAAACTATGAGGTTTGCCCGTAGAACGTATCGCTGAAATGACGAAAGTAAGCGCTTACGAACTTATTATGTATGGACCGGGTCATCTGACACCATC
374	alsA	AAGCTTTGCTCGAAGAAACTATGCATCATGGATGAACCCACCTCCTCACTCACCAATAAAGAGGTGGACTATCTGTTTCTGTGTATGGACCGGGTCATCTGACACCATC
375	alsA	AAGCTTTGCTCGAAGAAACTATGCAGAAAAAAGGTCCGGGATATCTCATTTAGCGTCTGCCGGGGAGAAATATTAGGCTTTGTGTATGGACCGGGTCATCTGACACCATC
376	alsA	AAGCTTTGCTCGAAGAAACTATGTGCATTACTAGGAGAAAATGGCGCGGGTAAATCCACGCTAATGAAAGTTTTATCCGGAATGTATGGACCGGGTCATCTGACACCATC
377	alsA	AAGCTTTGCTCGAAGAAACTATGGAAAAGTCATCCTGATGGTGTCATCTGAACTACCTGAAATTATCACCGTCTGCGACCGTGTATGGACCGGGTCATCTGACACCATC
378	alsA	AAGCTTTGCTCGAAGAAACTATGCATCTGACGAAAAAAATCTGTGGCGTCAATATTATCGACTGGCGAGAAATGCGTGTCCTGTATGGACCGGGTCATCTGACACCATC
379	alsB	AAGCTTTGCTCGAAGAAACTATGTAAAAATTACAAAGGTATCGCCTTCGCTCCATTATCCTCAGTGAATCTGGTCATGCCTGTTGTATGGACCGGGTCATCTGACACCATC
380	alsB	AAGCTTTGCTCGAAGAAACTATGCGCCGAATATGCTGTCGTATTGAAAACCCTCTCCAACCCATTTTGGGTAGATATGAAAAATGTATGGACCGGGTCATCTGACACCATC
381	alsB	AAGCTTTGCTCGAAGAAACTATGCGTCAGCGTTGATATTTTTGCCTCTCCTTCAGAAGGCGATTTTCAATCTCAATTGCAGTTTGTATGGACCGGGTCATCTGACACCATC
382	alsB	AAGCTTTGCTCGAAGAAACTATGCCCGCGCATGGAAAAAAGGCATTTATCTGGTTAATCTCGATGAAAAAATCGACATGGATATGTATGGACCGGGTCATCTGACACCATC
383	alsB	AAGCTTTGCTCGAAGAAACTATGTGTTGCAACGTAATCCGAATATTAAAGCGATCTATTGCGCGAATGACACGATGGCAATGTGTATGGACCGGGTCATCTGACACCATC
384	alsC	AAGCTTTGCTCGAAGAAACTATGCCATCAACAACGGTCTGAATATTTTGCAGGTACAAACCTATTACCAACTGGTGGTGATGGTGTATGGACCGGGTCATCTGACACCATC
385	alsC	AAGCTTTGCTCGAAGAAACTATGACCACCAATAATATTACCCAGATTTTTGTTCAAAGCTCCGTGACGGTATTGATCGGCATGTGTATGGACCGGGTCATCTGACACCATC
386	alsC	AAGCTTTGCTCGAAGAAACTATGAATATTTTGCAGGTACAAACCTATTACCAACTGGTGGTGATGGGCGGATTAATTATCGCGTGTATGGACCGGGTCATCTGACACCATC
387	alsC	AAGCTTTGCTCGAAGAAACTATGCTGACCACCAATAATATTACCCAGATTTTTGTTCAAAGCTCCGTGACGGTATTGATCGGCTGTATGGACCGGGTCATCTGACACCATC
388	alsC	AAGCTTTGCTCGAAGAAACTATGCACCAATAATATTACCCAGATTTTTGTTCAAAGCTCCGTGACGGTATTGATCGGCATGGGTGTATGGACCGGGTCATCTGACACCATC
389	alsE	AAGCTTTGCTCGAAGAAACTATGTAACCCGGAGACGCCAGTTGAGGCCATGAAATACTATATCCATAAGGCCGATAAAATTACTGTATGGACCGGGTCATCTGACACCATC
390	alsE	AAGCTTTGCTCGAAGAAACTATGACGCCAGTTGAGGCCATGAAATACTATATCCATAAGGCCGATAAAATTACGGTCATGACTTGTATGGACCGGGTCATCTGACACCATC
391	alsE	AAGCTTTGCTCGAAGAAACTATGCTTAACCCGGAGACGCCAGTTGAGGCCATGAAATACTATATCCATAAGGCCGATAAAATTTGTATGGACCGGGTCATCTGACACCATC
392	alsE	AAGCTTTGCTCGAAGAAACTATGTCCCCAATCTGACACTCTCACCGTTCTTCGTAAGTCAGGTTAAAAAACTGGCAACTAAACTGTATGGACCGGGTCATCTGACACCATC
393	alsE	AAGCTTTGCTCGAAGAAACTATGGTCCCCAATCTGACACTCTCACCGTTCTTCGTAAGTCAGGTTAAAAAACTGGCAACTAAATGTATGGACCGGGTCATCTGACACCATC
394	alsK	AAGCTTTGCTCGAAGAAACTATGGTTAACAGCGGCGGATTTATATGATCTCGCCGATAAGCTCGAAAATACGCTGAATTGTCTGTATGGACCGGGTCATCTGACACCATC
395	alsK	AAGCTTTGCTCGAAGAAACTATGAAAGATAAACGCACCATTATTTCTACGCCTAACCTGCCGTTAACAGCGGCGGATTTATATTGTATGGACCGGGTCATCTGACACCATC
396	alsK	AAGCTTTGCTCGAAGAAACTATGGCGGATTTATATGATCTCGCCGATAAGCTCGAAAATACGCTGAATTGTCCGGTTGAGTTTTGTATGGACCGGGTCATCTGACACCATC
397	alsK	AAGCTTTGCTCGAAGAAACTATGATAAACGCACCATTATTTCTACGCCTAACCTGCCGTTAACAGCGGCGGATTTATATGATCTGTATGGACCGGGTCATCTGACACCATC
398	alsK	AAGCTTTGCTCGAAGAAACTATGGATAAACGCACCATTATTTCTACGCCTAACCTGCCGTTAACAGCGGCGGATTTATATGATTGTATGGACCGGGTCATCTGACACCATC
399	alx	AAGCTTTGCTCGAAGAAACTATGTTTGGCATTCTGGTGATGACGTTTATTATCAACGCCTGGGTGAATTATCGGCATGATAAGTGTATGGACCGGGTCATCTGACACCATC
400	alx	AAGCTTTGCTCGAAGAAACTATGCTGGCGGTGATTCTGGTGTTTATCGGTATCAAGATGCTGATTGTCGACTTCTACCATATTTGTATGGACCGGGTCATCTGACACCATC
401	alx	AAGCTTTGCTCGAAGAAACTATGGCGGTGATTCTGGTGTTTATCGGTATCAAGATGCTGATTGTCGACTTCTACCATATTCCATGTATGGACCGGGTCATCTGACACCATC
402	alx	AAGCTTTGCTCGAAGAAACTATGTGGCGGTGATTCTGGTGTTTATCGGTATCAAGATGCTGATTGTCGACTTCTACCATATTCTGTATGGACCGGGTCATCTGACACCATC
403	alx	AAGCTTTGCTCGAAGAAACTATGGGCGGTGATTCTGGTGTTTATCGGTATCAAGATGCTGATTGTCGACTTCTACCATATTCCTGTATGGACCGGGTCATCTGACACCATC
404	amiA	AAGCTTTGCTCGAAGAAACTATGTGCAACAAGTGCTGTTTGATCTGGTGCAAACAGATACCATTAAAAATAGTCTGACGCTCGTGTATGGACCGGGTCATCTGACACCATC
405	amiA	AAGCTTTGCTCGAAGAAACTATGTGATCTGGTGCAAACAGATACCATTAAAAATAGTCTGACGCTCGGCTCGCATATTCTGAATGTATGGACCGGGTCATCTGACACCATC
406	amiA	AAGCTTTGCTCGAAGAAACTATGTTGATCTGGTGCAAACAGATACCATTAAAAATAGTCTGACGCTCGGCTCGCATATTCTGATGTATGGACCGGGTCATCTGACACCATC
407	amiA	AAGCTTTGCTCGAAGAAACTATGCTGACAAGGATCACCTATTGCAACAAGTGCTGTTTGATCTGGTGCAAACAGATACCATTATGTATGGACCGGGTCATCTGACACCATC
408	amiA	AAGCTTTGCTCGAAGAAACTATGAGATACCATTAAAAATAGTCTGACGCTCGGCTCGCATATTCTGAAGAAGATTAAGCCGGTTGTATGGACCGGGTCATCTGACACCATC
409	amiB	AAGCTTTGCTCGAAGAAACTATGGATAACGTTGAGTTTTATTGGCGATCCTGATTATGCGTTTAGCCATCAAAGCAAACGCACTGTATGGACCGGGTCATCTGACACCATC
410	amiB	AAGCTTTGCTCGAAGAAACTATGAATCCGTTTAAAACGGAAAGTAACCGCACTACGGGTGTTATCAGCAGTAATACGGTAACGTGTATGGACCGGGTCATCTGACACCATC
411	amiB	AAGCTTTGCTCGAAGAAACTATGTATGATGTAGCGACCAGTATGATCAGTCAGTTGCAACGCATTGGCGAAATACATAAACGTTGTATGGACCGGGTCATCTGACACCATC
412	amiB	AAGCTTTGCTCGAAGAAACTATGGTTTCTAACGGTAATCAACAGGCGCGGATAACGTTGAGTTTTATTGGCGATCCTGATTATTGTATGGACCGGGTCATCTGACACCATC
413	amiB	AAGCTTTGCTCGAAGAAACTATGATATTCAGGTTTCTAACGGTAATCAACAGGCGCGGATAACGTTGAGTTTTATTGGCGATCTGTATGGACCGGGTCATCTGACACCATC
414	amiC	AAGCTTTGCTCGAAGAAACTATGCAGCCTGAAGTTTGGTAAAGCGGTACTGAATAAGCTCGGTAAAATCAACAAGCTGCATAATGTATGGACCGGGTCATCTGACACCATC
415	amiC	AAGCTTTGCTCGAAGAAACTATGGAATAAGCTCGGTAAAATCAACAAGCTGCATAAAAATCAAGTTGAACAGGCCGGGTTTGCTGTATGGACCGGGTCATCTGACACCATC
416	amiC	AAGCTTTGCTCGAAGAAACTATGACTGAATAAGCTCGGTAAAATCAACAAGCTGCATAAAAATCAAGTTGAACAGGCCGGGTTTGTATGGACCGGGTCATCTGACACCATC
417	amiC	AAGCTTTGCTCGAAGAAACTATGAGCCTGAAGTTTGGTAAAGCGGTACTGAATAAGCTCGGTAAAATCAACAAGCTGCATAAATGTATGGACCGGGTCATCTGACACCATC
418	amiC	AAGCTTTGCTCGAAGAAACTATGTGAATAAGCTCGGTAAAATCAACAAGCTGCATAAAAATCAAGTTGAACAGGCCGGGTTTGTGTATGGACCGGGTCATCTGACACCATC
419	amn	AAGCTTTGCTCGAAGAAACTATGTTCGTCTTGTTTACCAACTACACACGTTATGTGGATGAATTCGTTCGTTGGGGATGCAGTGTATGGACCGGGTCATCTGACACCATC
420	amn	AAGCTTTGCTCGAAGAAACTATGTACTCAGCTTCTGCACTTCGTTTTAACTTAAGCCGGGCCGTAGCAATTGATATGGAAAGTGTATGGACCGGGTCATCTGACACCATC
421	amn	AAGCTTTGCTCGAAGAAACTATGGTATGAGCAATCTGTAGTCGCATTACGCAACGCCATTGGCAACTATATTACAAGTGGCTGTATGGACCGGGTCATCTGACACCATC
422	amn	AAGCTTTGCTCGAAGAAACTATGAAGCCATTTCCGACCTTGCATGGAAAAAACATCAGATGCCAGCATGGCATTTAATTACTGTATGGACCGGGTCATCTGACACCATC
423	amn	AAGCTTTGCTCGAAGAAACTATGATGAAACTGCAGACGGCATTTATCATCCAACTGAATTCTCCCCGCTATCGCATTTTGATGTGTATGGACCGGGTCATCTGACACCATC
424	ampC	AAGCTTTGCTCGAAGAAACTATGAACAAAAGATCCCGGGTATGGCGGTGGCGGTAATTTATCAGGGTAAACCTTATTACTTTATGTATGGACCGGGTCATCTGACACCATC
425	ampC	AAGCTTTGCTCGAAGAAACTATGCTTATTAATTACCGCCTCTTGCTCCACATTTGCTGCCCCTCAACAAATCAACGATATTGTTGTATGGACCGGGTCATCTGACACCATC
426	ampC	AAGCTTTGCTCGAAGAAACTATGACAAATCAACGATATTGTGCATCGCACAATTACCCCGCTTATAGAGCAACAAAAGATCCCTGTATGGACCGGGTCATCTGACACCATC
427	ampC	AAGCTTTGCTCGAAGAAACTATGATTGAAGATATGGCCCGCTGGGTGCAAAGCAATTTAAAACCCCTTGATATCAATGAGAAATGTATGGACCGGGTCATCTGACACCATC
428	ampC	AAGCTTTGCTCGAAGAAACTATGTAATTTATCAGGGTAAACCTTATTACTTTACCTGGGGCTATGCGGACATCGCCAAAAAGCTGTATGGACCGGGTCATCTGACACCATC
429	ampD	AAGCTTTGCTCGAAGAAACTATGACTGTTTGATTCGCCGTGATGGTGAAATAGTCCAGTATGTTCCTTTCGATAAACGTGCATTGTATGGACCGGGTCATCTGACACCATC
430	ampD	AAGCTTTGCTCGAAGAAACTATGTCACTGTTTGATTCGCCGTGATGGTGAAATAGTCCAGTATGTTCCTTTCGATAAACGTGCTGTATGGACCGGGTCATCTGACACCATC
431	ampD	AAGCTTTGCTCGAAGAAACTATGGTTTGATTCGCCGTGATGGTGAAATAGTCCAGTATGTTCCTTTCGATAAACGTGCATGGTGTATGGACCGGGTCATCTGACACCATC
432	ampD	AAGCTTTGCTCGAAGAAACTATGTGTTTGATTCGCCGTGATGGTGAAATAGTCCAGTATGTTCCTTTCGATAAACGTGCATGTGTATGGACCGGGTCATCTGACACCATC
433	ampD	AAGCTTTGCTCGAAGAAACTATGCTGTTTGATTCGCCGTGATGGTGAAATAGTCCAGTATGTTCCTTTCGATAAACGTGCATTGTATGGACCGGGTCATCTGACACCATC
434	ampE	AAGCTTTGCTCGAAGAAACTATGTATTGGCGCAGGTAAAGTTCGTCTTCATTATCATGCTTATCTGACAGCTGCTTCACGTAATGTATGGACCGGGTCATCTGACACCATC
435	ampE	AAGCTTTGCTCGAAGAAACTATGCTGCTGATTGGTTTGCTGTGTATTGGCGCAGGTAAAGTTCGTCTTCATTATCATGCTTATTGTATGGACCGGGTCATCTGACACCATC
436	ampE	AAGCTTTGCTCGAAGAAACTATGCAAAATGCATTGCTGTGGATTAACTTTCGTTTTTATCTTGCACCGCTGTTCTGGCTGATTTGTATGGACCGGGTCATCTGACACCATC
437	ampE	AAGCTTTGCTCGAAGAAACTATGAAAATGCATTGCTGTGGATTAACTTTCGTTTTTATCTTGCACCGCTGTTCTGGCTGATTGTGTATGGACCGGGTCATCTGACACCATC
438	ampE	AAGCTTTGCTCGAAGAAACTATGTTGGTTTGCTGTGTATTGGCGCAGGTAAAGTTCGTCTTCATTATCATGCTTATCTGACAGTGTATGGACCGGGTCATCTGACACCATC
439	ampG	AAGCTTTGCTCGAAGAAACTATGGAATATACACGAGTAAATGACAACTTTATCTCCCGTACCGCATATCCGGCAGGTTATGCCTGTATGGACCGGGTCATCTGACACCATC
440	ampG	AAGCTTTGCTCGAAGAAACTATGGCTGTTAATGACGCTATGTAATAAGTCATTTTCCGCTACTCAATTTGCCCTGCTCTCAGCTGTATGGACCGGGTCATCTGACACCATC
441	ampG	AAGCTTTGCTCGAAGAAACTATGTATTTTGCTGCTGGTTTGCCGCCAGACGCTTGAATATACACGAGTAAATGACAACTTTATTGTATGGACCGGGTCATCTGACACCATC
442	ampG	AAGCTTTGCTCGAAGAAACTATGAGCCTTTGTCGCGCTGTTAATGACGCTATGTAATAAGTCATTTTCCGCTACTCAATTTGCTGTATGGACCGGGTCATCTGACACCATC
443	ampG	AAGCTTTGCTCGAAGAAACTATGCAAAACCATTGGTTTCTTCTCTCTGGTAGGCCAGGCTTACGTTTTTAAATTCCTCTGGTCTGTATGGACCGGGTCATCTGACACCATC
444	ampH	AAGCTTTGCTCGAAGAAACTATGATATGATGCGCTGGATGCAGCAGTATTTGTCATCTGATTTTTATCAGCGCAGTAACCAGTGTATGGACCGGGTCATCTGACACCATC
445	ampH	AAGCTTTGCTCGAAGAAACTATGCGATCACTGAACCGGAGTTTGCCTCTGATATTGTCGATCGTTATGCCGATCATATTTTTTTGTATGGACCGGGTCATCTGACACCATC
446	ampH	AAGCTTTGCTCGAAGAAACTATGTGAACCGGAGTTTGCCTCTGATATTGTCGATCGTTATGCCGATCATATTTTTTACGGCAGTGTATGGACCGGGTCATCTGACACCATC
447	ampH	AAGCTTTGCTCGAAGAAACTATGCTGAACCGGAGTTTGCCTCTGATATTGTCGATCGTTATGCCGATCATATTTTTTACGGCATGTATGGACCGGGTCATCTGACACCATC
448	ampH	AAGCTTTGCTCGAAGAAACTATGACTGAACCGGAGTTTGCCTCTGATATTGTCGATCGTTATGCCGATCATATTTTTTACGGCTGTATGGACCGGGTCATCTGACACCATC
449	amtB	AAGCTTTGCTCGAAGAAACTATGCAATGCGTTTATGATGATTTGTACTGCGCTGGTGCTGTTTATGACTATTCCGGGGATTGTGTATGGACCGGGTCATCTGACACCATC
450	amtB	AAGCTTTGCTCGAAGAAACTATGATAAAGCCGACAATGCGTTTATGATGATTTGTACTGCGCTGGTGCTGTTTATGACTATTCTGTATGGACCGGGTCATCTGACACCATC
451	amtB	AAGCTTTGCTCGAAGAAACTATGGATAAAGCCGACAATGCGTTTATGATGATTTGTACTGCGCTGGTGCTGTTTATGACTATTTGTATGGACCGGGTCATCTGACACCATC
452	amtB	AAGCTTTGCTCGAAGAAACTATGCCGATAAAGCCGACAATGCGTTTATGATGATTTGTACTGCGCTGGTGCTGTTTATGACTATGTATGGACCGGGTCATCTGACACCATC
453	amtB	AAGCTTTGCTCGAAGAAACTATGGACAATGCGTTTATGATGATTTGTACTGCGCTGGTGCTGTTTATGACTATTCCGGGGATTTGTATGGACCGGGTCATCTGACACCATC
454	amyA	AAGCTTTGCTCGAAGAAACTATGGCGGTATCGACCATATCGAAAACCCTGACGAAGATGGCATTTTTAAAATTGTTAACGACTTGTATGGACCGGGTCATCTGACACCATC
455	amyA	AAGCTTTGCTCGAAGAAACTATGTTGATAAGCTGCAAACGTATATTGATCAGGTGGAAGGCAAAACCATGCTGTTTGATGCTGTATGGACCGGGTCATCTGACACCATC
456	amyA	AAGCTTTGCTCGAAGAAACTATGAAAACCATTCATCTGGGAGAGAATTACGGCAATAAAACCTGGCGTGATTTTCTGGGGAACTGTATGGACCGGGTCATCTGACACCATC
457	amyA	AAGCTTTGCTCGAAGAAACTATGTCGGCTACGACTCCTATGATTTATTTGATTTAGGCGAGTTTGATCAGAAAGGCAGCATCTGTATGGACCGGGTCATCTGACACCATC
458	amyA	AAGCTTTGCTCGAAGAAACTATGGTTTTAATGATATTGGTATCAATATGGTCTGGTTGCCGCCCGCCTATAAAGGCGCATCTGTATGGACCGGGTCATCTGACACCATC
459	anmK	AAGCTTTGCTCGAAGAAACTATGCAATGCCTTGCTTAAGGAACAAAATCTGCAGGCAAGAGATATAGTTGCGATCGGTTGTCTGTATGGACCGGGTCATCTGACACCATC
460	anmK	AAGCTTTGCTCGAAGAAACTATGGTCAATGCCTTGCTTAAGGAACAAAATCTGCAGGCAAGAGATATAGTTGCGATCGGTTGTGTATGGACCGGGTCATCTGACACCATC
461	anmK	AAGCTTTGCTCGAAGAAACTATGTTTTGCTGATGCGGTCAATGCCTTGCTTAAGGAACAAAATCTGCAGGCAAGAGATATAGTGTATGGACCGGGTCATCTGACACCATC
462	anmK	AAGCTTTGCTCGAAGAAACTATGCTTAAGGAACAAAATCTGCAGGCAAGAGATATAGTTGCGATCGGTTGTCACGGTCAAACCTGTATGGACCGGGTCATCTGACACCATC
463	anmK	AAGCTTTGCTCGAAGAAACTATGTCAATGCCTTGCTTAAGGAACAAAATCTGCAGGCAAGAGATATAGTTGCGATCGGTTGTCTGTATGGACCGGGTCATCTGACACCATC
464	ansA	AAGCTTTGCTCGAAGAAACTATGGACAAATTAATCTGCTGAATGCGTTGTACGTTGCGGCGAATTATCCGATCAACGAAGTAATGTATGGACCGGGTCATCTGACACCATC
465	ansA	AAGCTTTGCTCGAAGAAACTATGCGGAGATGCCAGATTTCACCATTCATGAATATACGCCGCTGATGGATTCTTCAGATATGATGTATGGACCGGGTCATCTGACACCATC
466	ansA	AAGCTTTGCTCGAAGAAACTATGGAATTATCCGATCAACGAAGTAACGCTCTTTTTCAATAACCGATTGTATCGCGGCAACCGTGTATGGACCGGGTCATCTGACACCATC
467	ansA	AAGCTTTGCTCGAAGAAACTATGCGAATTATCCGATCAACGAAGTAACGCTCTTTTTCAATAACCGATTGTATCGCGGCAACCTGTATGGACCGGGTCATCTGACACCATC
468	ansA	AAGCTTTGCTCGAAGAAACTATGCGTTGCGGCGAATTATCCGATCAACGAAGTAACGCTCTTTTTCAATAACCGATTGTATCGTGTATGGACCGGGTCATCTGACACCATC
469	ansB	AAGCTTTGCTCGAAGAAACTATGGACATGAACGATAATGTCTGGCTGACACTGGCGAAAAAAATTAACACCGACTGCGATAAGTGTATGGACCGGGTCATCTGACACCATC
470	ansB	AAGCTTTGCTCGAAGAAACTATGCATGAACGATAATGTCTGGCTGACACTGGCGAAAAAAATTAACACCGACTGCGATAAGACTGTATGGACCGGGTCATCTGACACCATC
471	ansB	AAGCTTTGCTCGAAGAAACTATGGTGACTCCGCAACCAAATCTAACTACACAGTGGGTAAAGTTGGCGTAGAAAATCTGGTTATGTATGGACCGGGTCATCTGACACCATC
472	ansB	AAGCTTTGCTCGAAGAAACTATGCTCCGCAACCAAATCTAACTACACAGTGGGTAAAGTTGGCGTAGAAAATCTGGTTAATGCTGTATGGACCGGGTCATCTGACACCATC
473	ansB	AAGCTTTGCTCGAAGAAACTATGATGTCTCTAAGCTGAATGAACTGCCGAAAGTCGGCATTGTTTATAACTACGCTAACGCATTGTATGGACCGGGTCATCTGACACCATC
474	ansP	AAGCTTTGCTCGAAGAAACTATGAATATGATCGGTGTGAAATGGTTTGCGGAGATGGAGTTCTGGTTTGCGCTTATTAAAGTGTGTATGGACCGGGTCATCTGACACCATC
475	ansP	AAGCTTTGCTCGAAGAAACTATGGTTCGTGACGTTTTTCTCTAAACTGGGTGTGCCATATATCGGCAGCATTATGAACATTGTTGTATGGACCGGGTCATCTGACACCATC
476	ansP	AAGCTTTGCTCGAAGAAACTATGTTCGTGACGTTTTTCTCTAAACTGGGTGTGCCATATATCGGCAGCATTATGAACATTGTGTGTATGGACCGGGTCATCTGACACCATC
477	ansP	AAGCTTTGCTCGAAGAAACTATGATGAATATGATCGGTGTGAAATGGTTTGCGGAGATGGAGTTCTGGTTTGCGCTTATTAAATGTATGGACCGGGTCATCTGACACCATC
478	ansP	AAGCTTTGCTCGAAGAAACTATGCGTTCGTGACGTTTTTCTCTAAACTGGGTGTGCCATATATCGGCAGCATTATGAACATTGTGTATGGACCGGGTCATCTGACACCATC
479	apaG	AAGCTTTGCTCGAAGAAACTATGTTCACCTGATAATGAACGTTACGTTTTTGCTTATACCGTAACCATACGCAATCTGGGGCTGTATGGACCGGGTCATCTGACACCATC
480	apaG	AAGCTTTGCTCGAAGAAACTATGTTCACCTGATAATGAACGTTACGTTTTTGCTTATACCGTAACCATACGCAATCTGGGGCGTGTATGGACCGGGTCATCTGACACCATC
481	apaG	AAGCTTTGCTCGAAGAAACTATGTCTTCACCTGATAATGAACGTTACGTTTTTGCTTATACCGTAACCATACGCAATCTGGGGTGTATGGACCGGGTCATCTGACACCATC
482	apaG	AAGCTTTGCTCGAAGAAACTATGCACCTGATAATGAACGTTACGTTTTTGCTTATACCGTAACCATACGCAATCTGGGGCGAGTGTATGGACCGGGTCATCTGACACCATC
483	apaG	AAGCTTTGCTCGAAGAAACTATGGTGTGTATTCAGGTTCAAAGCGTCTACATTGAGGCTCAATCTTCACCTGATAATGAACGTTGTATGGACCGGGTCATCTGACACCATC
484	apaH	AAGCTTTGCTCGAAGAAACTATGCGTTCATGGTTGTTACGATGAACTGATCGCATTGCTGCATAAAGTAGAATTTACCCCTGGTGTATGGACCGGGTCATCTGACACCATC
485	apaH	AAGCTTTGCTCGAAGAAACTATGTACGATGAACTGATCGCATTGCTGCATAAAGTAGAATTTACCCCTGGGAAAGATACCCTCTGTATGGACCGGGTCATCTGACACCATC
486	apaH	AAGCTTTGCTCGAAGAAACTATGTTACGATGAACTGATCGCATTGCTGCATAAAGTAGAATTTACCCCTGGGAAAGATACCCTTGTATGGACCGGGTCATCTGACACCATC
487	apaH	AAGCTTTGCTCGAAGAAACTATGATTGGCGACGTTCATGGTTGTTACGATGAACTGATCGCATTGCTGCATAAAGTAGAATTTTGTATGGACCGGGTCATCTGACACCATC
488	apaH	AAGCTTTGCTCGAAGAAACTATGCTTATTGGCGACGTTCATGGTTGTTACGATGAACTGATCGCATTGCTGCATAAAGTAGAATGTATGGACCGGGTCATCTGACACCATC
489	aphA	AAGCTTTGCTCGAAGAAACTATGAAAACAGAAACGGTTTCAAAAACGCTGGCGGATAATTTTCATATTCCTGCCACCAACATGTGTATGGACCGGGTCATCTGACACCATC
490	aphA	AAGCTTTGCTCGAAGAAACTATGGGCAAAAAAACCTTCTCGCCAGAAAGCGAAGATTATCTGAAAAATCCTGTGTTCTGGGAATGTATGGACCGGGTCATCTGACACCATC
491	aphA	AAGCTTTGCTCGAAGAAACTATGCTGAAAAATCCTGTGTTCTGGGAAAAAATGAACAATGGCTGGGATGAATTCAGCATTCCATGTATGGACCGGGTCATCTGACACCATC
492	aphA	AAGCTTTGCTCGAAGAAACTATGTGAAAAATCCTGTGTTCTGGGAAAAAATGAACAATGGCTGGGATGAATTCAGCATTCCAATGTATGGACCGGGTCATCTGACACCATC
493	aphA	AAGCTTTGCTCGAAGAAACTATGAATCCTGTGTTCTGGGAAAAAATGAACAATGGCTGGGATGAATTCAGCATTCCAAAAGAGTGTATGGACCGGGTCATCTGACACCATC
494	appA	AAGCTTTGCTCGAAGAAACTATGGCTTAATTTTCCGCAATCAAACTTGTGCCTTAAACGTGAGAAACAGGACGAAAGCTGTTCTGTATGGACCGGGTCATCTGACACCATC
495	appA	AAGCTTTGCTCGAAGAAACTATGTCTTAATCCCATTTTTATCTCTTCTGATTCCGTTAACCCCGCAATCTGCATTCGCTCAGATGTATGGACCGGGTCATCTGACACCATC
496	appA	AAGCTTTGCTCGAAGAAACTATGCAATAACCGTACATACCCAGGCAGATACGTCCAGTCCCGATCCGTTATTTAATCCTCTAATGTATGGACCGGGTCATCTGACACCATC
497	appA	AAGCTTTGCTCGAAGAAACTATGCGATCTTAATCCCATTTTTATCTCTTCTGATTCCGTTAACCCCGCAATCTGCATTCGCTCTGTATGGACCGGGTCATCTGACACCATC
498	appA	AAGCTTTGCTCGAAGAAACTATGGATTCACACCAGTGGAACACCTTGCTAAGTTTGCATAACGCGCAATTTTATTTGCTACAATGTATGGACCGGGTCATCTGACACCATC
499	appB	AAGCTTTGCTCGAAGAAACTATGTATGTTGGTAATCGTGCTGATATTTTTGCCCATTGTGTTGCTCTACACTCTCTGGAGCTATGTATGGACCGGGTCATCTGACACCATC
500	appB	AAGCTTTGCTCGAAGAAACTATGTCGTGCTGATATTTTTGCCCATTGTGTTGCTCTACACTCTCTGGAGCTACTACAAAATGTTGTATGGACCGGGTCATCTGACACCATC
501	appB	AAGCTTTGCTCGAAGAAACTATGAGCATTATGTTGGTAATCGTGCTGATATTTTTGCCCATTGTGTTGCTCTACACTCTCTGGTGTATGGACCGGGTCATCTGACACCATC
502	appB	AAGCTTTGCTCGAAGAAACTATGCGTGCTGATATTTTTGCCCATTGTGTTGCTCTACACTCTCTGGAGCTACTACAAAATGTGTGTATGGACCGGGTCATCTGACACCATC
503	appB	AAGCTTTGCTCGAAGAAACTATGGTGCTGATATTTTTGCCCATTGTGTTGCTCTACACTCTCTGGAGCTACTACAAAATGTGGTGTATGGACCGGGTCATCTGACACCATC
504	appC	AAGCTTTGCTCGAAGAAACTATGCTGACCATGGAGTTTCAGTTTGGTACTAACTGGTCATTCTATTCCAACTATGTGGGCGATTGTATGGACCGGGTCATCTGACACCATC
505	appC	AAGCTTTGCTCGAAGAAACTATGCTACCGGCCTGACCATGGAGTTTCAGTTTGGTACTAACTGGTCATTCTATTCCAACTATGTGTATGGACCGGGTCATCTGACACCATC
506	appC	AAGCTTTGCTCGAAGAAACTATGGCTGATTTTTTTGCTGGCTATTATGGAAACCATTTACGTGGTCACCGGCAAAACAATCTATGTATGGACCGGGTCATCTGACACCATC
507	appC	AAGCTTTGCTCGAAGAAACTATGTTCAGTTTGGTACTAACTGGTCATTCTATTCCAACTATGTGGGCGATATTTTTGGCGCACTGTATGGACCGGGTCATCTGACACCATC
508	appC	AAGCTTTGCTCGAAGAAACTATGTACCGGCCTGACCATGGAGTTTCAGTTTGGTACTAACTGGTCATTCTATTCCAACTATGTTGTATGGACCGGGTCATCTGACACCATC
509	appY	AAGCTTTGCTCGAAGAAACTATGAGCTGCCTGGCAAATTTACTCTTGATAAGAATGGCTATATTGCTGAAGAGGAACCTCCATGTATGGACCGGGTCATCTGACACCATC
510	appY	AAGCTTTGCTCGAAGAAACTATGATGAGCTGCCTGGCAAATTTACTCTTGATAAGAATGGCTATATTGCTGAAGAGGAACCTCTGTATGGACCGGGTCATCTGACACCATC
511	appY	AAGCTTTGCTCGAAGAAACTATGAATGAGCTGCCTGGCAAATTTACTCTTGATAAGAATGGCTATATTGCTGAAGAGGAACCTTGTATGGACCGGGTCATCTGACACCATC
512	appY	AAGCTTTGCTCGAAGAAACTATGTGGCTATATTGCTGAAGAGGAACCTCCATTATCGCTTGTTTTTTCTCTGTTTGAAGGGATTGTATGGACCGGGTCATCTGACACCATC
513	appY	AAGCTTTGCTCGAAGAAACTATGATGGCTATATTGCTGAAGAGGAACCTCCATTATCGCTTGTTTTTTCTCTGTTTGAAGGGATGTATGGACCGGGTCATCTGACACCATC
514	apt	AAGCTTTGCTCGAAGAAACTATGGACTGCACAGCAGCTTGAGTATCTCAAAAATAGCATCAAAAGCATTCAGGACTACCCAAATGTATGGACCGGGTCATCTGACACCATC
515	apt	AAGCTTTGCTCGAAGAAACTATGCACAGCAGCTTGAGTATCTCAAAAATAGCATCAAAAGCATTCAGGACTACCCAAAACCCGTGTATGGACCGGGTCATCTGACACCATC
516	apt	AAGCTTTGCTCGAAGAAACTATGACTGCACAGCAGCTTGAGTATCTCAAAAATAGCATCAAAAGCATTCAGGACTACCCAAAATGTATGGACCGGGTCATCTGACACCATC
517	apt	AAGCTTTGCTCGAAGAAACTATGGCACAGCAGCTTGAGTATCTCAAAAATAGCATCAAAAGCATTCAGGACTACCCAAAACCCTGTATGGACCGGGTCATCTGACACCATC
518	apt	AAGCTTTGCTCGAAGAAACTATGTATCTCAAAAATAGCATCAAAAGCATTCAGGACTACCCAAAACCCGGCATTCTTTTCCGCTGTATGGACCGGGTCATCTGACACCATC
519	aqpZ	AAGCTTTGCTCGAAGAAACTATGCTTAACCCTGATTCACTTAATTAGTATTCCGGTGACTAACACTTCTGTTAACCCGGCGCGTGTATGGACCGGGTCATCTGACACCATC
520	aqpZ	AAGCTTTGCTCGAAGAAACTATGTCAGAAAATTAGCAGCTGAATGTTTTGGTACTTTCTGGCTTGTTTTTGGTGGCTGTGGTATGTATGGACCGGGTCATCTGACACCATC
521	aqpZ	AAGCTTTGCTCGAAGAAACTATGCCGATCGCTATTGGTCTGGCCTTAACCCTGATTCACTTAATTAGTATTCCGGTGACTAACTGTATGGACCGGGTCATCTGACACCATC
522	aqpZ	AAGCTTTGCTCGAAGAAACTATGGAAAATTAGCAGCTGAATGTTTTGGTACTTTCTGGCTTGTTTTTGGTGGCTGTGGTAGTGTGTATGGACCGGGTCATCTGACACCATC
523	aqpZ	AAGCTTTGCTCGAAGAAACTATGTGTTCAGAAAATTAGCAGCTGAATGTTTTGGTACTTTCTGGCTTGTTTTTGGTGGCTGTGTGTATGGACCGGGTCATCTGACACCATC
524	araA	AAGCTTTGCTCGAAGAAACTATGACGATTTTTGATAATTATGAAGTGTGGTTTGTCATTGGCAGCCAGCATCTGTATGGCCCTGTATGGACCGGGTCATCTGACACCATC
525	araA	AAGCTTTGCTCGAAGAAACTATGTGACGATTTTTGATAATTATGAAGTGTGGTTTGTCATTGGCAGCCAGCATCTGTATGGCTGTATGGACCGGGTCATCTGACACCATC
526	araA	AAGCTTTGCTCGAAGAAACTATGGATTTTTGATAATTATGAAGTGTGGTTTGTCATTGGCAGCCAGCATCTGTATGGCCCGTGTATGGACCGGGTCATCTGACACCATC
527	araA	AAGCTTTGCTCGAAGAAACTATGCGATTTTTGATAATTATGAAGTGTGGTTTGTCATTGGCAGCCAGCATCTGTATGGCCCTGTATGGACCGGGTCATCTGACACCATC
528	araA	AAGCTTTGCTCGAAGAAACTATGGATTTTTGATAATTATGAAGTGTGGTTTGTCATTGGCAGCCAGCATCTGTATGGCCCGGTGTATGGACCGGGTCATCTGACACCATC
529	araB	AAGCTTTGCTCGAAGAAACTATGTTGACTACTCCCGCTACATTGGTGGTATTTATTCCAGCGAATGGTTCTGGGCAAAAATCTGTATGGACCGGGTCATCTGACACCATC
530	araB	AAGCTTTGCTCGAAGAAACTATGCTACATTGGTGGTATTTATTCCAGCGAATGGTTCTGGGCAAAAATCCTGCATGTGACTCGTGTATGGACCGGGTCATCTGACACCATC
531	araB	AAGCTTTGCTCGAAGAAACTATGGACTACTCCCGCTACATTGGTGGTATTTATTCCAGCGAATGGTTCTGGGCAAAAATCTGTATGGACCGGGTCATCTGACACCATC
532	araB	AAGCTTTGCTCGAAGAAACTATGGTTGACTACTCCCGCTACATTGGTGGTATTTATTCCAGCGAATGGTTCTGGGCAAAAATTGTATGGACCGGGTCATCTGACACCATC
533	araB	AAGCTTTGCTCGAAGAAACTATGTACATTGGTGGTATTTATTCCAGCGAATGGTTCTGGGCAAAAATCCTGCATGTGACTTGTATGGACCGGGTCATCTGACACCATC
534	araD	AAGCTTTGCTCGAAGAAACTATGAGAAATCAACGGCGAATATGAGTGGGAAACCGGTAACGTCATCGTAGAAACCTTTGAAAATGTATGGACCGGGTCATCTGACACCATC
535	araD	AAGCTTTGCTCGAAGAAACTATGAATCAACGGCGAATATGAGTGGGAAACCGGTAACGTCATCGTAGAAACCTTTGAAAAACTGTATGGACCGGGTCATCTGACACCATC
536	araD	AAGCTTTGCTCGAAGAAACTATGCAGAAATCAACGGCGAATATGAGTGGGAAACCGGTAACGTCATCGTAGAAACCTTTGAAATGTATGGACCGGGTCATCTGACACCATC
537	araD	AAGCTTTGCTCGAAGAAACTATGGGCGAATATGAGTGGGAAACCGGTAACGTCATCGTAGAAACCTTTGAAAAACAGGGTATCTGTATGGACCGGGTCATCTGACACCATC
538	araD	AAGCTTTGCTCGAAGAAACTATGGCGAATATGAGTGGGAAACCGGTAACGTCATCGTAGAAACCTTTGAAAAACAGGGTATCGTGTATGGACCGGGTCATCTGACACCATC
539	araE	AAGCTTTGCTCGAAGAAACTATGGTATGAATATGTTTGTTTCGGTAGCTGCTGCGGTCGCAGGATTGTTATTTGGTCTTGATATGTATGGACCGGGTCATCTGACACCATC
540	araE	AAGCTTTGCTCGAAGAAACTATGTTCTGAAATGGCAAGTGAAAACGTTCGCGGTAAGATGATCAGTATGTACCAGTTGATGGTTGTATGGACCGGGTCATCTGACACCATC
541	araE	AAGCTTTGCTCGAAGAAACTATGTTTCTGAAATGGCAAGTGAAAACGTTCGCGGTAAGATGATCAGTATGTACCAGTTGATGGTGTATGGACCGGGTCATCTGACACCATC
542	araE	AAGCTTTGCTCGAAGAAACTATGTCTGAAATGGCAAGTGAAAACGTTCGCGGTAAGATGATCAGTATGTACCAGTTGATGGTCTGTATGGACCGGGTCATCTGACACCATC
543	araE	AAGCTTTGCTCGAAGAAACTATGGTATGAATATGTTTGTTTCGGTAGCTGCTGCGGTCGCAGGATTGTTATTTGGTCTTGATTGTATGGACCGGGTCATCTGACACCATC
544	araF	AAGCTTTGCTCGAAGAAACTATGCGAAATGCTTTACAACTGGGTAGCAAAAGACGTTGAACCGCCAAAATTTACCGAAGTTACTGTATGGACCGGGTCATCTGACACCATC
545	araF	AAGCTTTGCTCGAAGAAACTATGGAAGGATTTAGGGTTTGAGGTTATTAAGATTGCCGTGCCGGATGGCGAAAAAACATTGAATGTATGGACCGGGTCATCTGACACCATC
546	araF	AAGCTTTGCTCGAAGAAACTATGGGAAAAACAAATTTATCAGGTACCTACCAAATCTAACGACATCCCGGGGGCATTTGACGTGTATGGACCGGGTCATCTGACACCATC
547	araF	AAGCTTTGCTCGAAGAAACTATGATATGAAAGTCATTGCCGTGGATGACCAGTTTGTTAACGCCAAAGGTAAGCCAATGGATATGTATGGACCGGGTCATCTGACACCATC
548	araF	AAGCTTTGCTCGAAGAAACTATGCTGAAAGCGGCCGGATTCCCGGAAAAACAAATTTATCAGGTACCTACCAAATCTAACGACTGTATGGACCGGGTCATCTGACACCATC
549	araG	AAGCTTTGCTCGAAGAAACTATGTTTGCCCTCAGCGATGCCATTACTGTCTTTAAAGATGGACGTTATGTCAAAACCTTTACCTGTATGGACCGGGTCATCTGACACCATC
550	araG	AAGCTTTGCTCGAAGAAACTATGTGTCTTTAAAGATGGACGTTATGTCAAAACCTTTACCGATATGCAGCAGGTTGACCACGATGTATGGACCGGGTCATCTGACACCATC
551	araG	AAGCTTTGCTCGAAGAAACTATGCATAAAGGCGGCATTGTGAATCGCTCATTGCTGAATTATGAGGCGGGTTTACAACTTAAATGTATGGACCGGGTCATCTGACACCATC
552	araG	AAGCTTTGCTCGAAGAAACTATGGTCAGGTTCATGCGTTGATGGGTGAAAATGGCGCAGGAAAATCAACTCTCTTAAAAATCTGTATGGACCGGGTCATCTGACACCATC
553	araG	AAGCTTTGCTCGAAGAAACTATGCAATCTTTTCCGCGTTATTCGTGAACTGCGAAAAGAGGGGCGGGTAATCTTATACGTTTCTGTATGGACCGGGTCATCTGACACCATC
554	araH	AAGCTTTGCTCGAAGAAACTATGTTCGCACCAAAATTATTATCTTTGTTCTCTCAGGCCTGGTATCAGCGATAGCCGGAATTATGTATGGACCGGGTCATCTGACACCATC
555	araH	AAGCTTTGCTCGAAGAAACTATGAAACTGAAAATAAATGCTCTGATCACGACATTGGCAACGATGCAGATTGTTCGAGGTCTGTGTATGGACCGGGTCATCTGACACCATC
556	araH	AAGCTTTGCTCGAAGAAACTATGCAAACTGAAAATAAATGCTCTGATCACGACATTGGCAACGATGCAGATTGTTCGAGGTCTTGTATGGACCGGGTCATCTGACACCATC
557	araH	AAGCTTTGCTCGAAGAAACTATGTACCGGTTGTTCGCACCAAAATTATTATCTTTGTTCTCTCAGGCCTGGTATCAGCGATAGTGTATGGACCGGGTCATCTGACACCATC
558	araH	AAGCTTTGCTCGAAGAAACTATGGGTGCTCTTTATCGCCTGTGCCATTTTTGTCCCAAATTTTGCCACCTTCATTAATATGAATGTATGGACCGGGTCATCTGACACCATC
559	araJ	AAGCTTTGCTCGAAGAAACTATGTTTGCTTTTATTTGTTGCGCGGGATTATTTGCCCTTTCAGCACCGCTACAAATATTGTTATGTATGGACCGGGTCATCTGACACCATC
560	araJ	AAGCTTTGCTCGAAGAAACTATGTTATTATGATGTTAGTTGGGCTAGGGATGGTGCTGGGAAATATGCTAAGTGGCAGGATTTTGTATGGACCGGGTCATCTGACACCATC
561	araJ	AAGCTTTGCTCGAAGAAACTATGCAATCATCGCACTCTTTTCCAGCCGCTACTCACTCAAACATATCTTGTTGTTTCTGGTGTGTATGGACCGGGTCATCTGACACCATC
562	araJ	AAGCTTTGCTCGAAGAAACTATGCATTTTTTGGCGTCGGAGCGATCGTGTTATCAAAAATTATCAAACCCGGAAAAGTCACCTGTATGGACCGGGTCATCTGACACCATC
563	araJ	AAGCTTTGCTCGAAGAAACTATGCTACAAATATTGTTACTACAAAACGCCAAAGGCGGAGAGTTATTAGGTGCCGCAGGTGTGTATGGACCGGGTCATCTGACACCATC
564	arcA	AAGCTTTGCTCGAAGAAACTATGCTGAATATGACATCAACCTGGTGATCATGGATATCAATCTGCCGGGTAAGAACGGTCTTCTGTATGGACCGGGTCATCTGACACCATC
565	arcA	AAGCTTTGCTCGAAGAAACTATGAGATCCTCTCTGAATATGACATCAACCTGGTGATCATGGATATCAATCTGCCGGGTAAGATGTATGGACCGGGTCATCTGACACCATC
566	arcA	AAGCTTTGCTCGAAGAAACTATGCTTATCGTTGAAGACGAGTTGGTAACACGCAACACGTTGAAAAGTATTTTCGAAGCGGAATGTATGGACCGGGTCATCTGACACCATC
567	arcA	AAGCTTTGCTCGAAGAAACTATGTTATCGTTGAAGACGAGTTGGTAACACGCAACACGTTGAAAAGTATTTTCGAAGCGGAAGTGTATGGACCGGGTCATCTGACACCATC
568	arcA	AAGCTTTGCTCGAAGAAACTATGTTCTTATCGTTGAAGACGAGTTGGTAACACGCAACACGTTGAAAAGTATTTTCGAAGCGGTGTATGGACCGGGTCATCTGACACCATC
569	arcB	AAGCTTTGCTCGAAGAAACTATGCAGGAAAAATATCTCAAGACCATCCATGTTTCGGCCGTCACGCTGGGGAATATCTTTAATGTATGGACCGGGTCATCTGACACCATC
570	arcB	AAGCTTTGCTCGAAGAAACTATGAAGACATTGAACTGAACGTGATTGTTGCGCGTTCTGTGCTGGAAAAATTAGGTAACAGCTGTATGGACCGGGTCATCTGACACCATC
571	arcB	AAGCTTTGCTCGAAGAAACTATGATAAAATTTTCGCCATGTATTACCAGGTGAAAGACAGTCATGGCGGTAAACCTGCCACTGTATGGACCGGGTCATCTGACACCATC
572	arcB	AAGCTTTGCTCGAAGAAACTATGAAATTCTGGGATACCCAGGATGATGAGGAGAGTACGGTGACGACAGAAGAGAACAGTAATGTATGGACCGGGTCATCTGACACCATC
573	arcB	AAGCTTTGCTCGAAGAAACTATGCCTCAACGTTCAGTTAAAAGATAATATTGCCCAGCTAAATCAGGAAATTGCCGTTCGTGATGTATGGACCGGGTCATCTGACACCATC
574	argA	AAGCTTTGCTCGAAGAAACTATGAGAGCAAAAAGCAGTTGTACAACTACCAGCGTAAATCCAAAGTGTTGATGGCGGATTTAGTGTATGGACCGGGTCATCTGACACCATC
575	argA	AAGCTTTGCTCGAAGAAACTATGATTGATTTACTGCCCGAGAGCAAAAAGCAGTTGTACAACTACCAGCGTAAATCCAAAGTGTGTATGGACCGGGTCATCTGACACCATC
576	argA	AAGCTTTGCTCGAAGAAACTATGGGTGAAGCCATTGAGCATGAGAATTTCTCCAGTATCGTTAATGATATCGGGTTGTTGCACTGTATGGACCGGGTCATCTGACACCATC
577	argA	AAGCTTTGCTCGAAGAAACTATGCAAAAAGCAGTTGTACAACTACCAGCGTAAATCCAAAGTGTTGATGGCGGATTTAGGGTATGTATGGACCGGGTCATCTGACACCATC
578	argA	AAGCTTTGCTCGAAGAAACTATGGTGGATATTGATTTACTGCCCGAGAGCAAAAAGCAGTTGTACAACTACCAGCGTAAATCCTGTATGGACCGGGTCATCTGACACCATC
579	argB	AAGCTTTGCTCGAAGAAACTATGAAGCAGAACAACTGATTGAGCAGGGCATTATTACTGACGGCATGATAGTGAAAGTGAACTGTATGGACCGGGTCATCTGACACCATC
580	argB	AAGCTTTGCTCGAAGAAACTATGAAGCAGAACAACTGATTGAGCAGGGCATTATTACTGACGGCATGATAGTGAAAGTGAACGTGTATGGACCGGGTCATCTGACACCATC
581	argB	AAGCTTTGCTCGAAGAAACTATGGAAAGCAGAACAACTGATTGAGCAGGGCATTATTACTGACGGCATGATAGTGAAAGTGATGTATGGACCGGGTCATCTGACACCATC
582	argB	AAGCTTTGCTCGAAGAAACTATGAAAGCAGAACAACTGATTGAGCAGGGCATTATTACTGACGGCATGATAGTGAAAGTGAATGTATGGACCGGGTCATCTGACACCATC
583	argB	AAGCTTTGCTCGAAGAAACTATGCAGAACAACTGATTGAGCAGGGCATTATTACTGACGGCATGATAGTGAAAGTGAACGCTGTATGGACCGGGTCATCTGACACCATC
584	argC	AAGCTTTGCTCGAAGAAACTATGCTTCTATGAAAAATATTACGGCTTTACCCATCAATACCCGGAACTGTTGGAACAGGCAGCTGTATGGACCGGGTCATCTGACACCATC
585	argC	AAGCTTTGCTCGAAGAAACTATGAGAGCTAGTGACCTATGTAAATCGCCATCCGCATATGAACATAACCGCTTTGACTGTTTCTGTATGGACCGGGTCATCTGACACCATC
586	argC	AAGCTTTGCTCGAAGAAACTATGCACCTTCTATGAAAAATATTACGGCTTTACCCATCAATACCCGGAACTGTTGGAACAGGCTGTATGGACCGGGTCATCTGACACCATC
587	argC	AAGCTTTGCTCGAAGAAACTATGGCCACCTTCTATGAAAAATATTACGGCTTTACCCATCAATACCCGGAACTGTTGGAACAGTGTATGGACCGGGTCATCTGACACCATC
588	argC	AAGCTTTGCTCGAAGAAACTATGCGCGTTTCGTGTTAACGACGCCACCTTCTATGAAAAATATTACGGCTTTACCCATCAATATGTATGGACCGGGTCATCTGACACCATC
589	argD	AAGCTTTGCTCGAAGAAACTATGGTTTTGTTGACCATCTGCAGAAGATCGATCAGCAGTACGATGTATTTAGCGATATTCGCGTGTATGGACCGGGTCATCTGACACCATC
590	argD	AAGCTTTGCTCGAAGAAACTATGCGTTTTGTTGACCATCTGCAGAAGATCGATCAGCAGTACGATGTATTTAGCGATATTCGCTGTATGGACCGGGTCATCTGACACCATC
591	argD	AAGCTTTGCTCGAAGAAACTATGGCGTTTTGTTGACCATCTGCAGAAGATCGATCAGCAGTACGATGTATTTAGCGATATTCGTGTATGGACCGGGTCATCTGACACCATC
592	argD	AAGCTTTGCTCGAAGAAACTATGAAAACCAAAATTATTGCCTTCCATAACGCTTTTCATGGTCGCTCGCTGTTTACCGTTTCTGTATGGACCGGGTCATCTGACACCATC
593	argD	AAGCTTTGCTCGAAGAAACTATGTGTTGACCATCTGCAGAAGATCGATCAGCAGTACGATGTATTTAGCGATATTCGCGGTATTGTATGGACCGGGTCATCTGACACCATC
594	argE	AAGCTTTGCTCGAAGAAACTATGAAACAAATTACCGCCATTTATCGAGATTTACCGCGCTCTGATTGCCACACCTTCAATAAGTGTATGGACCGGGTCATCTGACACCATC
595	argE	AAGCTTTGCTCGAAGAAACTATGATATTTTGCAATTGCGCGATAACCTGAAAGAACGTTATCACTACGAAGCGTTTACCGTGCTGTATGGACCGGGTCATCTGACACCATC
596	argE	AAGCTTTGCTCGAAGAAACTATGGCATATTTTGCAATTGCGCGATAACCTGAAAGAACGTTATCACTACGAAGCGTTTACCGTTGTATGGACCGGGTCATCTGACACCATC
597	argE	AAGCTTTGCTCGAAGAAACTATGCACTCGATCAAAGCAATGCAGATTTAATCACTCTGCTGGCGGACTGGTTTAAAGATTTGGTGTATGGACCGGGTCATCTGACACCATC
598	argE	AAGCTTTGCTCGAAGAAACTATGGCTCAATTAATCAGGCTCATCAACCTGATGAATATCTGGAAACACGGTTTATCAAGCCCATGTATGGACCGGGTCATCTGACACCATC
599	argF	AAGCTTTGCTCGAAGAAACTATGAAAAAAAATGGCAAGGAAGTACAGAAGCTTACCGGTAAAAACATCGCGCTCATCTTCGAATGTATGGACCGGGTCATCTGACACCATC
600	argF	AAGCTTTGCTCGAAGAAACTATGGCTCAAAGCCGATAAAAAAAATGGCAAGGAAGTACAGAAGCTTACCGGTAAAAACATCGCTGTATGGACCGGGTCATCTGACACCATC
601	argF	AAGCTTTGCTCGAAGAAACTATGGCACAGCTCAAAGCCGATAAAAAAAATGGCAAGGAAGTACAGAAGCTTACCGGTAAAAACTGTATGGACCGGGTCATCTGACACCATC
602	argF	AAGCTTTGCTCGAAGAAACTATGTAAAAAAAATGGCAAGGAAGTACAGAAGCTTACCGGTAAAAACATCGCGCTCATCTTCGATGTATGGACCGGGTCATCTGACACCATC
603	argF	AAGCTTTGCTCGAAGAAACTATGAAAATGGCAAGGAAGTACAGAAGCTTACCGGTAAAAACATCGCGCTCATCTTCGAAAAAGTGTATGGACCGGGTCATCTGACACCATC
604	argG	AAGCTTTGCTCGAAGAAACTATGATACTGACTTTATTGATGAACTGGGCGGCCGTCATGAGATGTCTGAATTTATGATTGCCTTGTATGGACCGGGTCATCTGACACCATC
605	argG	AAGCTTTGCTCGAAGAAACTATGTGAATATCTGGGGTGACGGTAGCACCTACAAAGGAAACGATATCGAACGTTTCTATCGTTTGTATGGACCGGGTCATCTGACACCATC
606	argG	AAGCTTTGCTCGAAGAAACTATGGAACGTTTCTATCGTTATGGTCTGCTGACCAATGCTGAACTGCAGATTTACAAACCGTGTGTATGGACCGGGTCATCTGACACCATC
607	argG	AAGCTTTGCTCGAAGAAACTATGGTCAATTGACCATGCGTAACCTGGATATCACTGATACCCGCGAGAAACTTTTCGGTTATGTGTATGGACCGGGTCATCTGACACCATC
608	argG	AAGCTTTGCTCGAAGAAACTATGGATTATTCAATCCTGAATACCGTCTCAGAGAACCTGACCTACAAGCCAGAGCGTCTGACTGTATGGACCGGGTCATCTGACACCATC
609	argH	AAGCTTTGCTCGAAGAAACTATGGTTGCAGAAATTCAGTCAGGTGATTGACGAAGATGTCTATCCGATTCTGTCGCTGCAATCTGTATGGACCGGGTCATCTGACACCATC
610	argH	AAGCTTTGCTCGAAGAAACTATGTCAGTGAGTTGCAGAAATTCAGTCAGGTGATTGACGAAGATGTCTATCCGATTCTGTCGTGTATGGACCGGGTCATCTGACACCATC
611	argH	AAGCTTTGCTCGAAGAAACTATGGTGAGTTGCAGAAATTCAGTCAGGTGATTGACGAAGATGTCTATCCGATTCTGTCGCTGTGTATGGACCGGGTCATCTGACACCATC
612	argH	AAGCTTTGCTCGAAGAAACTATGCAGTGAGTTGCAGAAATTCAGTCAGGTGATTGACGAAGATGTCTATCCGATTCTGTCGCTGTATGGACCGGGTCATCTGACACCATC
613	argH	AAGCTTTGCTCGAAGAAACTATGTCAGTGAGTTGCAGAAATTCAGTCAGGTGATTGACGAAGATGTCTATCCGATTCTGTCGCTGTATGGACCGGGTCATCTGACACCATC
614	argI	AAGCTTTGCTCGAAGAAACTATGTTTATCATAAGCATTTCCTGAAATTACTCGATTTCACGCCAGCTGAACTCAACAGCCTGCTGTATGGACCGGGTCATCTGACACCATC
615	argI	AAGCTTTGCTCGAAGAAACTATGCGATAAGAAAAGCGGTAAAGAAGAAGCCAAACTCACTGGTAAAAACATCGCGCTCATCTTTGTATGGACCGGGTCATCTGACACCATC
616	argI	AAGCTTTGCTCGAAGAAACTATGATAAGAAAAGCGGTAAAGAAGAAGCCAAACTCACTGGTAAAAACATCGCGCTCATCTTCGTGTATGGACCGGGTCATCTGACACCATC
617	argI	AAGCTTTGCTCGAAGAAACTATGCCGGGTTTTATCATAAGCATTTCCTGAAATTACTCGATTTCACGCCAGCTGAACTCAACATGTATGGACCGGGTCATCTGACACCATC
618	argI	AAGCTTTGCTCGAAGAAACTATGTCCGGGTTTTATCATAAGCATTTCCTGAAATTACTCGATTTCACGCCAGCTGAACTCAACTGTATGGACCGGGTCATCTGACACCATC
619	argK	AAGCTTTGCTCGAAGAAACTATGTAAAAAAGGGCTGATGGAAGTGGCTGATCTGATCGTTATCAACAAAGACGATGGCGATAATGTATGGACCGGGTCATCTGACACCATC
620	argK	AAGCTTTGCTCGAAGAAACTATGTTAAAAAAGGGCTGATGGAAGTGGCTGATCTGATCGTTATCAACAAAGACGATGGCGATATGTATGGACCGGGTCATCTGACACCATC
621	argK	AAGCTTTGCTCGAAGAAACTATGTGATGGAAGTGGCTGATCTGATCGTTATCAACAAAGACGATGGCGATAACCATACCAATGTGTATGGACCGGGTCATCTGACACCATC
622	argK	AAGCTTTGCTCGAAGAAACTATGATGGAAGTGGCTGATCTGATCGTTATCAACAAAGACGATGGCGATAACCATACCAATGTCTGTATGGACCGGGTCATCTGACACCATC
623	argK	AAGCTTTGCTCGAAGAAACTATGGATGGAAGTGGCTGATCTGATCGTTATCAACAAAGACGATGGCGATAACCATACCAATGTTGTATGGACCGGGTCATCTGACACCATC
624	argO	AAGCTTTGCTCGAAGAAACTATGTGTGATGAATCAGGGCATACGTCGTCAGTACCACATTATGATTGCCTTACTTTGTGCTATTGTATGGACCGGGTCATCTGACACCATC
625	argO	AAGCTTTGCTCGAAGAAACTATGACAAAATGCTTTTGTGATGAATCAGGGCATACGTCGTCAGTACCACATTATGATTGCCTTTGTATGGACCGGGTCATCTGACACCATC
626	argO	AAGCTTTGCTCGAAGAAACTATGTCCACAAAATGCTTTTGTGATGAATCAGGGCATACGTCGTCAGTACCACATTATGATTGCTGTATGGACCGGGTCATCTGACACCATC
627	argO	AAGCTTTGCTCGAAGAAACTATGCACAAAATGCTTTTGTGATGAATCAGGGCATACGTCGTCAGTACCACATTATGATTGCCTTGTATGGACCGGGTCATCTGACACCATC
628	argO	AAGCTTTGCTCGAAGAAACTATGGGTCCACAAAATGCTTTTGTGATGAATCAGGGCATACGTCGTCAGTACCACATTATGATTTGTATGGACCGGGTCATCTGACACCATC
629	argP	AAGCTTTGCTCGAAGAAACTATGTGCGTAAAGTCACTGATGCGTTACTCGATTATGGTCACAAAGTCCTTCGTCAGGATTAATGTATGGACCGGGTCATCTGACACCATC
630	argP	AAGCTTTGCTCGAAGAAACTATGATGCGTAAAGTCACTGATGCGTTACTCGATTATGGTCACAAAGTCCTTCGTCAGGATTATGTATGGACCGGGTCATCTGACACCATC
631	argP	AAGCTTTGCTCGAAGAAACTATGATGATGCGTAAAGTCACTGATGCGTTACTCGATTATGGTCACAAAGTCCTTCGTCAGGATTGTATGGACCGGGTCATCTGACACCATC
632	argP	AAGCTTTGCTCGAAGAAACTATGTGATGCGTAAAGTCACTGATGCGTTACTCGATTATGGTCACAAAGTCCTTCGTCAGGATTTGTATGGACCGGGTCATCTGACACCATC
633	argP	AAGCTTTGCTCGAAGAAACTATGCATGATGCGTAAAGTCACTGATGCGTTACTCGATTATGGTCACAAAGTCCTTCGTCAGGTGTATGGACCGGGTCATCTGACACCATC
634	argR	AAGCTTTGCTCGAAGAAACTATGAAGCATTTAAAGCATTACTTAAAGAAGAGAAATTTAGCTCCCAGGGCGAAATCGTCGCCGTGTATGGACCGGGTCATCTGACACCATC
635	argR	AAGCTTTGCTCGAAGAAACTATGGGAGCAAGGCTTTGACAATATTAATCAGTCTAAAGTCTCGCGGATGTTGACCAAGTTTGGTGTATGGACCGGGTCATCTGACACCATC
636	argR	AAGCTTTGCTCGAAGAAACTATGAATATTAATCAGTCTAAAGTCTCGCGGATGTTGACCAAGTTTGGTGCTGTACGTACACGCTGTATGGACCGGGTCATCTGACACCATC
637	argR	AAGCTTTGCTCGAAGAAACTATGGCAAGGCTTTGACAATATTAATCAGTCTAAAGTCTCGCGGATGTTGACCAAGTTTGGTGCTGTATGGACCGGGTCATCTGACACCATC
638	argR	AAGCTTTGCTCGAAGAAACTATGAAGGCTTTGACAATATTAATCAGTCTAAAGTCTCGCGGATGTTGACCAAGTTTGGTGCTGTGTATGGACCGGGTCATCTGACACCATC
639	argS	AAGCTTTGCTCGAAGAAACTATGGCTATCTCTACACCACCACTGATATCGCCTGTGCGAAATATCGTTATGAAACACTGCATGTGTATGGACCGGGTCATCTGACACCATC
640	argS	AAGCTTTGCTCGAAGAAACTATGTATTCCTTGATGAGTTTAAAAACAAGGAAGGCGAACCGATGGGCGTGATCATTCAGAAGATGTATGGACCGGGTCATCTGACACCATC
641	argS	AAGCTTTGCTCGAAGAAACTATGTGATGAGTTTAAAAACAAGGAAGGCGAACCGATGGGCGTGATCATTCAGAAGAAAGATGTGTATGGACCGGGTCATCTGACACCATC
642	argS	AAGCTTTGCTCGAAGAAACTATGCTTGATGAGTTTAAAAACAAGGAAGGCGAACCGATGGGCGTGATCATTCAGAAGAAAGATGTATGGACCGGGTCATCTGACACCATC
643	argS	AAGCTTTGCTCGAAGAAACTATGGTATTCCTTGATGAGTTTAAAAACAAGGAAGGCGAACCGATGGGCGTGATCATTCAGAATGTATGGACCGGGTCATCTGACACCATC
644	argT	AAGCTTTGCTCGAAGAAACTATGCTCATCAGTAAAAGACAAAAAATACTTCGGTGATGGCACCGGTGTAGGGCTACGTAAAGATGTATGGACCGGGTCATCTGACACCATC
645	argT	AAGCTTTGCTCGAAGAAACTATGTCAGTAAAAGACAAAAAATACTTCGGTGATGGCACCGGTGTAGGGCTACGTAAAGATGATTGTATGGACCGGGTCATCTGACACCATC
646	argT	AAGCTTTGCTCGAAGAAACTATGATCAGTAAAAGACAAAAAATACTTCGGTGATGGCACCGGTGTAGGGCTACGTAAAGATGATGTATGGACCGGGTCATCTGACACCATC
647	argT	AAGCTTTGCTCGAAGAAACTATGTCATCAGTAAAAGACAAAAAATACTTCGGTGATGGCACCGGTGTAGGGCTACGTAAAGATTGTATGGACCGGGTCATCTGACACCATC
648	argT	AAGCTTTGCTCGAAGAAACTATGAAAAATCGACGCTATTATTTCGTCGCTTTCCATTACCGATAAACGTCAGCAGGAGATTGCTGTATGGACCGGGTCATCTGACACCATC
649	arnA	AAGCTTTGCTCGAAGAAACTATGCCGTTTTCTGAATCATCCGCATTTTCACTTTGTTGAAGGCGATATCAGTATTCATTCCGATGTATGGACCGGGTCATCTGACACCATC
650	arnA	AAGCTTTGCTCGAAGAAACTATGGCGAATCATCTTCCCGTCAACTTCAGAAGTTTATGGGATGTGTAGCGATAAATACTTCGATGTATGGACCGGGTCATCTGACACCATC
651	arnA	AAGCTTTGCTCGAAGAAACTATGGAATGGATTGAGTATCATGTCAAAAAATGTGATGTCGTCTTGCCGCTGGTGGCGATAGTGTATGGACCGGGTCATCTGACACCATC
652	arnA	AAGCTTTGCTCGAAGAAACTATGAAACAATTACTTGATCGGGTGATCTGGGCCTATGGCGAAAAAGAGGGTTTACAGTTCACTGTATGGACCGGGTCATCTGACACCATC
653	arnA	AAGCTTTGCTCGAAGAAACTATGACCATTCTAATTTAATCGTCGGCCCGGTGAATAAACCACGCTGGATTTATTCGGTATCTGTATGGACCGGGTCATCTGACACCATC
654	arnB	AAGCTTTGCTCGAAGAAACTATGGCTATAAGTACAATCTGACCGATATTAACGCCGCGATTGCCCTGACACAGTTAGTCAAATTGTATGGACCGGGTCATCTGACACCATC
655	arnB	AAGCTTTGCTCGAAGAAACTATGGTATTACAAAGGGCGACATATTGGCGCAAAAGGTACCGCTATTTTTTCATTTCATGCCATTGTATGGACCGGGTCATCTGACACCATC
656	arnB	AAGCTTTGCTCGAAGAAACTATGCGGTACGTATTACAAAGGGCGACATATTGGCGCAAAAGGTACCGCTATTTTTTCATTTCATGTATGGACCGGGTCATCTGACACCATC
657	arnB	AAGCTTTGCTCGAAGAAACTATGGTCGGTACGTATTACAAAGGGCGACATATTGGCGCAAAAGGTACCGCTATTTTTTCATTTTGTATGGACCGGGTCATCTGACACCATC
658	arnB	AAGCTTTGCTCGAAGAAACTATGAAAAATATTACCTGTGCTGAAGGTGGCCTGATTGTAACTGATAATGAAAACCTTGCCCGCTGTATGGACCGGGTCATCTGACACCATC
659	arnC	AAGCTTTGCTCGAAGAAACTATGTTTATGCTATTTGCCGTGCTGTTTACTTTTATTGGCGCTCAGTTTATCGGCATGGGATTATGTATGGACCGGGTCATCTGACACCATC
660	arnC	AAGCTTTGCTCGAAGAAACTATGGTTTACTTTTATTGGCGCTCAGTTTATCGGCATGGGATTACTCGGTGAATATATCGGCAGTGTATGGACCGGGTCATCTGACACCATC
661	arnC	AAGCTTTGCTCGAAGAAACTATGATTCAGCGATTATGGCGGGATTCAGTCACGTTACTGGCGACTTAATTATTACCCTTGATGTGTATGGACCGGGTCATCTGACACCATC
662	arnC	AAGCTTTGCTCGAAGAAACTATGGTTACTGGCGACTTAATTATTACCCTTGATGCCGATCTCCAGAATCCGCCAGAAGAAATCTGTATGGACCGGGTCATCTGACACCATC
663	arnC	AAGCTTTGCTCGAAGAAACTATGGCCATTGAAATTCCAGTACATCATGCCGAGCGTGAGTTTGGTGAATCCAAATACAGTTTTTGTATGGACCGGGTCATCTGACACCATC
664	arnT	AAGCTTTGCTCGAAGAAACTATGAAATCGGTACGTTACCTTATCGGCCTCTTCGCGTTTATTGCCTGCTATTACCTGTTACTGTATGGACCGGGTCATCTGACACCATC
665	arnT	AAGCTTTGCTCGAAGAAACTATGAGACAGGTGAGTTGAAATACGGCCTTAATTATCCGGATGCGAAAGGGAGATTTGTCAGTGTATGGACCGGGTCATCTGACACCATC
666	arnT	AAGCTTTGCTCGAAGAAACTATGGATTAATGGCTGGATTAACATCGCTTTTGGCGTCACTGGCATTATTGCCACATTTGTGTGTATGGACCGGGTCATCTGACACCATC
667	arnT	AAGCTTTGCTCGAAGAAACTATGATGACACAAGAATCACTTCAGCCAAGCCGCTATATTCTTACTGATAGCGTCGGTGTTGTGTATGGACCGGGTCATCTGACACCATC
668	arnT	AAGCTTTGCTCGAAGAAACTATGATTGTTTATTGTCTATGCCATCGGCACTTATGCCGTGCTCGATCCGTTTATTGCATTCTGTGTATGGACCGGGTCATCTGACACCATC
669	aroA	AAGCTTTGCTCGAAGAAACTATGTATCAACAATTTGTCGTAAAAGGCGGGCAGTCTTATCAGTCTCCGGGTACTTATTTGGTTGTATGGACCGGGTCATCTGACACCATC
670	aroA	AAGCTTTGCTCGAAGAAACTATGGATACACCAGTGACGATTCTTGATCCCAAATGCACGGCCAAAACATTTCCGGATTATTTCTGTATGGACCGGGTCATCTGACACCATC
671	aroA	AAGCTTTGCTCGAAGAAACTATGAAACAGTATTAACCAATCTGCTGGATAGCGATGACGTGCGCCATATGCTGAATGCATTAATGTATGGACCGGGTCATCTGACACCATC
672	aroA	AAGCTTTGCTCGAAGAAACTATGCTTATCAGTCTCCGGGTACTTATTTGGTCGAAGGCGATGCATCTTCGGCTTCTTACTTTCTGTATGGACCGGGTCATCTGACACCATC
673	aroA	AAGCTTTGCTCGAAGAAACTATGCATATGCTGAATGCATTAACAGCGTTAGGGGTAAGCTATACGCTTTCAGCCGATCGTACTGTATGGACCGGGTCATCTGACACCATC
674	aroB	AAGCTTTGCTCGAAGAAACTATGGTCGTTACTCTCGGGGAACGTAGTTACCCAATTACCATCGCATCTGGTTTGTTTAATGAATGTATGGACCGGGTCATCTGACACCATC
675	aroB	AAGCTTTGCTCGAAGAAACTATGGATTGTCGTTACTCTCGGGGAACGTAGTTACCCAATTACCATCGCATCTGGTTTGTTTAATGTATGGACCGGGTCATCTGACACCATC
676	aroB	AAGCTTTGCTCGAAGAAACTATGTCAAATACGGCATTATTCTTGACGGTGCGTTTTTTAACTGGCTGGAAGAGAATCTGGATGTGTATGGACCGGGTCATCTGACACCATC
677	aroB	AAGCTTTGCTCGAAGAAACTATGCATCAAATACGGCATTATTCTTGACGGTGCGTTTTTTAACTGGCTGGAAGAGAATCTGGATGTATGGACCGGGTCATCTGACACCATC
678	aroB	AAGCTTTGCTCGAAGAAACTATGTCATCAAATACGGCATTATTCTTGACGGTGCGTTTTTTAACTGGCTGGAAGAGAATCTGGTGTATGGACCGGGTCATCTGACACCATC
679	aroC	AAGCTTTGCTCGAAGAAACTATGGCAGGAGCTATTGCCAAAAAATATCTCGCCGAGAAATTTGGTATTGAAATCCGTGGCTGTGTATGGACCGGGTCATCTGACACCATC
680	aroC	AAGCTTTGCTCGAAGAAACTATGCAGGAGCTATTGCCAAAAAATATCTCGCCGAGAAATTTGGTATTGAAATCCGTGGCTGTGTATGGACCGGGTCATCTGACACCATC
681	aroC	AAGCTTTGCTCGAAGAAACTATGGCTATTGCCAAAAAATATCTCGCCGAGAAATTTGGTATTGAAATCCGTGGCTGCCTGACTGTATGGACCGGGTCATCTGACACCATC
682	aroC	AAGCTTTGCTCGAAGAAACTATGGAGCTATTGCCAAAAAATATCTCGCCGAGAAATTTGGTATTGAAATCCGTGGCTGCCTGATGTATGGACCGGGTCATCTGACACCATC
683	aroC	AAGCTTTGCTCGAAGAAACTATGGGAGCTATTGCCAAAAAATATCTCGCCGAGAAATTTGGTATTGAAATCCGTGGCTGCTGTATGGACCGGGTCATCTGACACCATC
684	aroD	AAGCTTTGCTCGAAGAAACTATGGAAAACCGTAACTGTAAAAGATCTCGTCATTGGTACGGGCGCACCTAAAATCATCGTCTCTGTATGGACCGGGTCATCTGACACCATC
685	aroD	AAGCTTTGCTCGAAGAAACTATGATGAAAACCGTAACTGTAAAAGATCTCGTCATTGGTACGGGCGCACCTAAAATCATCGTCTGTATGGACCGGGTCATCTGACACCATC
686	aroD	AAGCTTTGCTCGAAGAAACTATGATATGATCGATCTGGAGTTATTTACCGGTGATGATCAGGTTAAAGAAACCGTCGCCTACGTGTATGGACCGGGTCATCTGACACCATC
687	aroD	AAGCTTTGCTCGAAGAAACTATGTTGATATGATCGATCTGGAGTTATTTACCGGTGATGATCAGGTTAAAGAAACCGTCGCCTTGTATGGACCGGGTCATCTGACACCATC
688	aroD	AAGCTTTGCTCGAAGAAACTATGAGCGGCCTGGTTGATATGATCGATCTGGAGTTATTTACCGGTGATGATCAGGTTAAAGAATGTATGGACCGGGTCATCTGACACCATC
689	aroE	AAGCTTTGCTCGAAGAAACTATGATCCCGTCATCGCTCATTCATCCAGGCATTTATTGCTATGACATGTTCTATCAGAAAGGATGTATGGACCGGGTCATCTGACACCATC
690	aroE	AAGCTTTGCTCGAAGAAACTATGTTGTTAAGCGATCTGGAACGTCTGTCTTTTATCCGCCCTGGTTTACGTATTCTGCTTATCTGTATGGACCGGGTCATCTGACACCATC
691	aroE	AAGCTTTGCTCGAAGAAACTATGATTGCTATGACATGTTCTATCAGAAAGGAAAAACTCCTTTTCTGGCATGGTGTGAGCAGCTGTATGGACCGGGTCATCTGACACCATC
692	aroE	AAGCTTTGCTCGAAGAAACTATGCTTGTTAAGCGATCTGGAACGTCTGTCTTTTATCCGCCCTGGTTTACGTATTCTGCTTATTGTATGGACCGGGTCATCTGACACCATC
693	aroE	AAGCTTTGCTCGAAGAAACTATGACTGGAAGGTCATGAGTTTGATCTCATTATTAATGCAACATCCAGTGGCATCAGTGGTGATGTATGGACCGGGTCATCTGACACCATC
694	aroF	AAGCTTTGCTCGAAGAAACTATGAATCCGTGGTTGCTCAAATCAAAGATGGCAATCGCTCAATTATTGGTCTGATGATCGAAATGTATGGACCGGGTCATCTGACACCATC
695	aroF	AAGCTTTGCTCGAAGAAACTATGAATTATTGGTCTGATGATCGAAAGTAATATCCACGAGGGCAATCAGTCTTCCGAGCAACCTGTATGGACCGGGTCATCTGACACCATC
696	aroF	AAGCTTTGCTCGAAGAAACTATGAAAGACGCGCTGAATAACGTACATATTACCGACGAACAGGTTTTAATGACTCCGGAACAATGTATGGACCGGGTCATCTGACACCATC
697	aroF	AAGCTTTGCTCGAAGAAACTATGAAAAGACGCGCTGAATAACGTACATATTACCGACGAACAGGTTTTAATGACTCCGGAACATGTATGGACCGGGTCATCTGACACCATC
698	aroF	AAGCTTTGCTCGAAGAAACTATGAGATGGCAATCGCTCAATTATTGGTCTGATGATCGAAAGTAATATCCACGAGGGCAATCATGTATGGACCGGGTCATCTGACACCATC
699	aroG	AAGCTTTGCTCGAAGAAACTATGCGACGATTTACGCATCAAAGAAATCAAAGAGTTACTTCCTCCTGTCGCATTGCTGGAAAATGTATGGACCGGGTCATCTGACACCATC
700	aroG	AAGCTTTGCTCGAAGAAACTATGTTACGCATCAAAGAAATCAAAGAGTTACTTCCTCCTGTCGCATTGCTGGAAAAATTCCCCTGTATGGACCGGGTCATCTGACACCATC
701	aroG	AAGCTTTGCTCGAAGAAACTATGAAATCAAAGAGTTACTTCCTCCTGTCGCATTGCTGGAAAAATTCCCCGCTACTGAAAATGTGTATGGACCGGGTCATCTGACACCATC
702	aroG	AAGCTTTGCTCGAAGAAACTATGAGGTGATGATCGATTTCAGCCATGCTAACTCGTCCAAACAATTCAAAAAGCAGATGGATGTGTATGGACCGGGTCATCTGACACCATC
703	aroG	AAGCTTTGCTCGAAGAAACTATGCAGGTGATGATCGATTTCAGCCATGCTAACTCGTCCAAACAATTCAAAAAGCAGATGGATTGTATGGACCGGGTCATCTGACACCATC
704	aroH	AAGCTTTGCTCGAAGAAACTATGCGCCGCAGAATTGAAAAAATACTGAATGGTGAAGATAAGCGACTGTTGGTCATTATTGGCTGTATGGACCGGGTCATCTGACACCATC
705	aroH	AAGCTTTGCTCGAAGAAACTATGTTTGAAAAACCACGAACTGTTGTCGGCTGGAAAGGACTAATCTCCGATCCAGATTTAAACTGTATGGACCGGGTCATCTGACACCATC
706	aroH	AAGCTTTGCTCGAAGAAACTATGGCCGCAGAATTGAAAAAATACTGAATGGTGAAGATAAGCGACTGTTGGTCATTATTGGCCTGTATGGACCGGGTCATCTGACACCATC
707	aroH	AAGCTTTGCTCGAAGAAACTATGCCTATTTTGAAAAACCACGAACTGTTGTCGGCTGGAAAGGACTAATCTCCGATCCAGATTTGTATGGACCGGGTCATCTGACACCATC
708	aroH	AAGCTTTGCTCGAAGAAACTATGTTGAAAAAATACTGAATGGTGAAGATAAGCGACTGTTGGTCATTATTGGCCCCTGCTCGTGTATGGACCGGGTCATCTGACACCATC
709	aroK	AAGCTTTGCTCGAAGAAACTATGCGTGACCATTCGTACTGATGATCAAAGCGCTAAAGTGGTTGCAAACCAGATTATTCACATTGTATGGACCGGGTCATCTGACACCATC
710	aroK	AAGCTTTGCTCGAAGAAACTATGAAAGCACTATTGGGCGCCAGTTAGCTCAACAACTCAATATGGAATTTTACGATTCCGATCTGTATGGACCGGGTCATCTGACACCATC
711	aroK	AAGCTTTGCTCGAAGAAACTATGAAAAAGCACTATTGGGCGCCAGTTAGCTCAACAACTCAATATGGAATTTTACGATTCCGATGTATGGACCGGGTCATCTGACACCATC
712	aroK	AAGCTTTGCTCGAAGAAACTATGGCACTATTGGGCGCCAGTTAGCTCAACAACTCAATATGGAATTTTACGATTCCGATCAAGTGTATGGACCGGGTCATCTGACACCATC
713	aroK	AAGCTTTGCTCGAAGAAACTATGTTCGTACTGATGATCAAAGCGCTAAAGTGGTTGCAAACCAGATTATTCACATGCTGGAAATGTATGGACCGGGTCATCTGACACCATC
714	aroL	AAGCTTTGCTCGAAGAAACTATGTAATCGTCACTTCATGCAAAATAACGGGATCGTGGTTTATTTGTGTGCGCCAGTATCAGTGTATGGACCGGGTCATCTGACACCATC
715	aroL	AAGCTTTGCTCGAAGAAACTATGTTAATCGTCACTTCATGCAAAATAACGGGATCGTGGTTTATTTGTGTGCGCCAGTATCATGTATGGACCGGGTCATCTGACACCATC
716	aroL	AAGCTTTGCTCGAAGAAACTATGGGAATTTAATCGTCACTTCATGCAAAATAACGGGATCGTGGTTTATTTGTGTGCGCCAGTGTATGGACCGGGTCATCTGACACCATC
717	aroL	AAGCTTTGCTCGAAGAAACTATGGACGGAATTTAATCGTCACTTCATGCAAAATAACGGGATCGTGGTTTATTTGTGTGCGCTGTATGGACCGGGTCATCTGACACCATC
718	aroL	AAGCTTTGCTCGAAGAAACTATGTGACGGAATTTAATCGTCACTTCATGCAAAATAACGGGATCGTGGTTTATTTGTGTGCGCTGTATGGACCGGGTCATCTGACACCATC
719	aroM	AAGCTTTGCTCGAAGAAACTATGAAAGAATTACTGGCAAAAGGGGCTGATGTCATCATGCTGGATTGTTTAGGATTTCACCAATGTATGGACCGGGTCATCTGACACCATC
720	aroM	AAGCTTTGCTCGAAGAAACTATGGAACAAAAAATCATTGATGCCGGGAAAGAATTACTGGCAAAAGGGGCTGATGTCATCATGTGTATGGACCGGGTCATCTGACACCATC
721	aroM	AAGCTTTGCTCGAAGAAACTATGATCGCGATTTACTGCAAAAACAGCTCGATGTTCCTGTCTTGCTGTCTAACGTATTGATTGTGTATGGACCGGGTCATCTGACACCATC
722	aroM	AAGCTTTGCTCGAAGAAACTATGTACCTATGCAGGAAGTTTTGCCGCTCCTGACGGAATACATTGACGAAGATAATATTTCCCTGTATGGACCGGGTCATCTGACACCATC
723	aroM	AAGCTTTGCTCGAAGAAACTATGACGAAGATAATATTTCCCATCATAGCCTGCTGGGGAAGTTAAGTCGTGAAGAAGTGATGGTGTATGGACCGGGTCATCTGACACCATC
724	aroP	AAGCTTTGCTCGAAGAAACTATGCCGGAGCAAAGTATACCGAAAGCAACTAACCAGGTTATCTACCGCATCCTGATTTTCTATTGTATGGACCGGGTCATCTGACACCATC
725	aroP	AAGCTTTGCTCGAAGAAACTATGGTATTCTTTGTGGTGATTAACGCCATCAACCTGACCAACGTTAAAGTGTTTGGCGAGATGTGTATGGACCGGGTCATCTGACACCATC
726	aroP	AAGCTTTGCTCGAAGAAACTATGGAGATGGAGTTCTGGTTTGCCATTATCAAAGTTATCGCGGTGGTAGCGATGATCATCTTCTGTATGGACCGGGTCATCTGACACCATC
727	aroP	AAGCTTTGCTCGAAGAAACTATGCAGTAAATACCATTCTGGTGTCTGCACTGGTAACGGCGTTGTGCGTACTGATTAACTACTGTATGGACCGGGTCATCTGACACCATC
728	aroP	AAGCTTTGCTCGAAGAAACTATGCGTCTGTCGATAAACGTGGTGTACCAGTAAATACCATTCTGGTGTCTGCACTGGTAACTGTATGGACCGGGTCATCTGACACCATC
729	arpA	AAGCTTTGCTCGAAGAAACTATGCCGACATGCTGAAAATTGTTTTGAACGCGTTACCTTTGTTAATTCGCACATGTCATTTGATGTATGGACCGGGTCATCTGACACCATC
730	arpA	AAGCTTTGCTCGAAGAAACTATGTCTGCCTTTGAGTTGGCTTTTGAATTTGGTCACCGGGTTATTGCTGAATTAATCCTTAATTGTATGGACCGGGTCATCTGACACCATC
731	arpA	AAGCTTTGCTCGAAGAAACTATGTGCGGAGAAAAATTATATGGAAGCTTTACTCAAAAAAGCATCTCCCCATACCGTACGCTTGTATGGACCGGGTCATCTGACACCATC
732	arpA	AAGCTTTGCTCGAAGAAACTATGTGAGTGCCAAAAATAGAACGTCCAGCCATGTTTTATACCATGTTATGGCGAATGGTGATGTATGGACCGGGTCATCTGACACCATC
733	arpA	AAGCTTTGCTCGAAGAAACTATGTCTGAACGCCTTACCTAAACTGGCCGCAACACATCATTTAGATAACGAACAAGTGTATAATGTATGGACCGGGTCATCTGACACCATC
734	arpB	AAGCTTTGCTCGAAGAAACTATGATAAGTCTCCTCATAGATTGCACATCGATAGCGACATACCAACACCTTCATCAGAGCCTATGTATGGACCGGGTCATCTGACACCATC
735	arpB	AAGCTTTGCTCGAAGAAACTATGTATAAGTCTCCTCATAGATTGCACATCGATAGCGACATACCAACACCTTCATCAGAGCCTTGTATGGACCGGGTCATCTGACACCATC
736	arpB	AAGCTTTGCTCGAAGAAACTATGTATTAATCAATTTGCGCGCCAGCTCATCACCCTACTTGATACCTCTGACTTAAGTTCGATTGTATGGACCGGGTCATCTGACACCATC
737	arpB	AAGCTTTGCTCGAAGAAACTATGGCCAGCTCATCACCCTACTTGATACCTCTGACTTAAGTTCGATGCTGTCATACTGTGTTATGTATGGACCGGGTCATCTGACACCATC
738	arpB	AAGCTTTGCTCGAAGAAACTATGAAGTCTCCTCATAGATTGCACATCGATAGCGACATACCAACACCTTCATCAGAGCCTATTTGTATGGACCGGGTCATCTGACACCATC
739	arpB	AAGCTTTGCTCGAAGAAACTATGCCTATTAATCAATTTGCGCGCCAGCTCATCACCCTACTTGATACCTCTGACTTAAGTTCGTGTATGGACCGGGTCATCTGACACCATC
740	arpB	AAGCTTTGCTCGAAGAAACTATGAGGCCAGTCTCAACAGCTTATTACATTATTCAAACAGTTGCCCATACTCCCTGAAAAAGATGTATGGACCGGGTCATCTGACACCATC
741	arpB	AAGCTTTGCTCGAAGAAACTATGAACCTGATTAAACATTACTCCTCCGTTGAATCCATACAGCAGCATGTCCCCTTAGTCCTGTATGGACCGGGTCATCTGACACCATC
742	arpB	AAGCTTTGCTCGAAGAAACTATGTCGCGAGTAAGGATTTTGGCTTCGCTTTAGATATTTTCTTTTGTCGAATGATGGCAAACATGTATGGACCGGGTCATCTGACACCATC
743	arpB	AAGCTTTGCTCGAAGAAACTATGATGCTGCTATTAATGCAATCAGCCAAAGCCTGAGTTTTAGTGCTGATGAAATAAAGACGTTGTATGGACCGGGTCATCTGACACCATC
744	arpB	AAGCTTTGCTCGAAGAAACTATGCGTTGGTACACCTGCTTTATTTTTGGCTATGATGAACGGACATACTGACAACGTGAAAATTGTATGGACCGGGTCATCTGACACCATC
745	arpB	AAGCTTTGCTCGAAGAAACTATGTGGCCGCTAAAAATCATGACAACATGTCAGCTGTTCATATAGCCATTCATCATAAGCATTTGTATGGACCGGGTCATCTGACACCATC
746	arpB	AAGCTTTGCTCGAAGAAACTATGGTCACACGGTTCCTCTCTAAAATTAATGGCATCGCCTTTAAATACAAGTTGAGCAAAGCTTGTATGGACCGGGTCATCTGACACCATC
747	arpB	AAGCTTTGCTCGAAGAAACTATGAAAATACATGATGGTGAGCCAGGATTATACGCCGCAATGGAAAATAATCACCCTTTGTGTGTATGGACCGGGTCATCTGACACCATC
748	arpB	AAGCTTTGCTCGAAGAAACTATGGGGTAATGAAGACGTCGTGTTATCTTATATATCGACGCTGGGTGCTTTTGCAAAAAAACATGTATGGACCGGGTCATCTGACACCATC
749	arsB	AAGCTTTGCTCGAAGAAACTATGGAATATGACTATCAGCTGGGGATATTACTTCCGTACAGGGATTATCATGACCCTGCCTGTTGTATGGACCGGGTCATCTGACACCATC
750	arsB	AAGCTTTGCTCGAAGAAACTATGAAGAATATGACTATCAGCTGGGGATATTACTTCCGTACAGGGATTATCATGACCCTGCCTTGTATGGACCGGGTCATCTGACACCATC
751	arsB	AAGCTTTGCTCGAAGAAACTATGATTGTTGCCACGCTGGTGATGTTACATCTCTATTTTCGCAAAGATATTCCGCAGAACTACTGTATGGACCGGGTCATCTGACACCATC
752	arsB	AAGCTTTGCTCGAAGAAACTATGACGCTGGTGATGTTACATCTCTATTTTCGCAAAGATATTCCGCAGAACTACGATATGGCGTGTATGGACCGGGTCATCTGACACCATC
753	arsB	AAGCTTTGCTCGAAGAAACTATGAATATGACTATCAGCTGGGGATATTACTTCCGTACAGGGATTATCATGACCCTGCCTGTGTGTATGGACCGGGTCATCTGACACCATC
754	arsC	AAGCTTTGCTCGAAGAAACTATGCCTTGCGGAAGATAAATTTACTGACGATCGGTTAATCGACTTTATGCTTCAGCACCCGATTGTATGGACCGGGTCATCTGACACCATC
755	arsC	AAGCTTTGCTCGAAGAAACTATGGCGGAAGATAAATTTACTGACGATCGGTTAATCGACTTTATGCTTCAGCACCCGATTCTGTGTATGGACCGGGTCATCTGACACCATC
756	arsC	AAGCTTTGCTCGAAGAAACTATGCTTGCGGAAGATAAATTTACTGACGATCGGTTAATCGACTTTATGCTTCAGCACCCGATTTGTATGGACCGGGTCATCTGACACCATC
757	arsC	AAGCTTTGCTCGAAGAAACTATGGTATGAGGAGCTGGGCCTTGCGGAAGATAAATTTACTGACGATCGGTTAATCGACTTTATGTATGGACCGGGTCATCTGACACCATC
758	arsC	AAGCTTTGCTCGAAGAAACTATGTTGCGGAAGATAAATTTACTGACGATCGGTTAATCGACTTTATGCTTCAGCACCCGATTCTGTATGGACCGGGTCATCTGACACCATC
759	arsR	AAGCTTTGCTCGAAGAAACTATGTGTTACCCATCCAATTGTTCAAAATTCTTGCTGATGAAACCCGTCTGGGCATCGTTTTACTGTATGGACCGGGTCATCTGACACCATC
760	arsR	AAGCTTTGCTCGAAGAAACTATGATGTCATTTCTGTTACCCATCCAATTGTTCAAAATTCTTGCTGATGAAACCCGTCTGGGCTGTATGGACCGGGTCATCTGACACCATC
761	arsR	AAGCTTTGCTCGAAGAAACTATGGTCATTTCTGTTACCCATCCAATTGTTCAAAATTCTTGCTGATGAAACCCGTCTGGGCATTGTATGGACCGGGTCATCTGACACCATC
762	arsR	AAGCTTTGCTCGAAGAAACTATGTTACCCATCCAATTGTTCAAAATTCTTGCTGATGAAACCCGTCTGGGCATCGTTTTACTTGTATGGACCGGGTCATCTGACACCATC
763	arsR	AAGCTTTGCTCGAAGAAACTATGCATTTCTGTTACCCATCCAATTGTTCAAAATTCTTGCTGATGAAACCCGTCTGGGCATCTGTATGGACCGGGTCATCTGACACCATC
764	artI	AAGCTTTGCTCGAAGAAACTATGAAATTCATTATGGATAAGCACCCGGAAATCACTACCGTTCCGTATGACAGCTACCAGAACTGTATGGACCGGGTCATCTGACACCATC
765	artI	AAGCTTTGCTCGAAGAAACTATGCTCAACACTGCGCTGGAAAAAGTGAAGAAAGATGGCACTTACGAAACCATCTACAACAAATGTATGGACCGGGTCATCTGACACCATC
766	artI	AAGCTTTGCTCGAAGAAACTATGAAACTCAACACTGCGCTGGAAAAAGTGAAGAAAGATGGCACTTACGAAACCATCTACAACTGTATGGACCGGGTCATCTGACACCATC
767	artI	AAGCTTTGCTCGAAGAAACTATGCGCTGGAAAAAGTGAAGAAAGATGGCACTTACGAAACCATCTACAACAAATGGTTCCAGATGTATGGACCGGGTCATCTGACACCATC
768	artI	AAGCTTTGCTCGAAGAAACTATGCAGAAATTCATTATGGATAAGCACCCGGAAATCACTACCGTTCCGTATGACAGCTACCAGTGTATGGACCGGGTCATCTGACACCATC
769	artJ	AAGCTTTGCTCGAAGAAACTATGGCCCTACTATGAAAACTCAGCCGTCGTGATTGCCAAAAAAGATACCTACAAAACGTTTGTGTATGGACCGGGTCATCTGACACCATC
770	artJ	AAGCTTTGCTCGAAGAAACTATGAAAGCCTTGTGCAAACAAATGCAGGCAGAATGTACTTTTACTAATCACGCGTTCGACAGTGTATGGACCGGGTCATCTGACACCATC
771	artJ	AAGCTTTGCTCGAAGAAACTATGGATCAGCACCCGGAAGTGAAAACTGTCTCTTATGACAGTTATCAGAATGCCTTTATCGATTGTATGGACCGGGTCATCTGACACCATC
772	artJ	AAGCTTTGCTCGAAGAAACTATGCCACCCTTTGAATCTATAGGTGCTAATAATGAGATTGTCGGCTTTGATATCGATCTGGCATGTATGGACCGGGTCATCTGACACCATC
773	artJ	AAGCTTTGCTCGAAGAAACTATGAAACCAATCCACAACTTGGTGTTGCTACTGAGAAAGTGACCGATCCGCAATATTTTGGTGTATGGACCGGGTCATCTGACACCATC
774	artM	AAGCTTTGCTCGAAGAAACTATGCTCTTCTTATTCCAACGAAGTGGTGCTGGTATTCAAAAGTACCTCTCTGGCATACACCATTGTATGGACCGGGTCATCTGACACCATC
775	artM	AAGCTTTGCTCGAAGAAACTATGGGTATTCAAAAGTACCTCTCTGGCATACACCATTACGCTGATGGAAGTGATGGGATACAGTGTATGGACCGGGTCATCTGACACCATC
776	artM	AAGCTTTGCTCGAAGAAACTATGCTGGTATTCAAAAGTACCTCTCTGGCATACACCATTACGCTGATGGAAGTGATGGGATACTGTATGGACCGGGTCATCTGACACCATC
777	artM	AAGCTTTGCTCGAAGAAACTATGCTCTCTTCTTATTCCAACGAAGTGGTGCTGGTATTCAAAAGTACCTCTCTGGCATACACCTGTATGGACCGGGTCATCTGACACCATC
778	artM	AAGCTTTGCTCGAAGAAACTATGTTTAAACGCTCGCTCTCTTCTTATTCCAACGAAGTGGTGCTGGTATTCAAAAGTACCTCTTGTATGGACCGGGTCATCTGACACCATC
779	artP	AAGCTTTGCTCGAAGAAACTATGGAGTGGTGTATATGGAAAATGGTCATATCGTAGAACAAGGCGACGCGAGCTGCTTTACTGTATGGACCGGGTCATCTGACACCATC
780	artP	AAGCTTTGCTCGAAGAAACTATGCGGAAATTACGGCACAAATCGTCAGCATCATTCGTGAGCTGGCAGAAACGAATATTATGTATGGACCGGGTCATCTGACACCATC
781	artP	AAGCTTTGCTCGAAGAAACTATGGAAATTACGGCACAAATCGTCAGCATCATTCGTGAGCTGGCAGAAACGAATATTACCCATGTATGGACCGGGTCATCTGACACCATC
782	artP	AAGCTTTGCTCGAAGAAACTATGAAATTACGGCACAAATCGTCAGCATCATTCGTGAGCTGGCAGAAACGAATATTACCCAGTGTATGGACCGGGTCATCTGACACCATC
783	artP	AAGCTTTGCTCGAAGAAACTATGGAGTGGTGTATATGGAAAATGGTCATATCGTAGAACAAGGCGACGCGAGCTGCTTTATGTATGGACCGGGTCATCTGACACCATC
784	artQ	AAGCTTTGCTCGAAGAAACTATGATACCGCGCTGGTCAGTTTGATTAGTGTGAATGATTTAATGCTGCAAACAAAAAGCATCGTGTATGGACCGGGTCATCTGACACCATC
785	artQ	AAGCTTTGCTCGAAGAAACTATGCGCGCTGGTCAGTTTGATTAGTGTGAATGATTTAATGCTGCAAACAAAAAGCATCGCTACTGTATGGACCGGGTCATCTGACACCATC
786	artQ	AAGCTTTGCTCGAAGAAACTATGGATTTAATGCTGCAAACAAAAAGCATCGCTACTCGTACCCAGGAACCATTTACCTGGTACTGTATGGACCGGGTCATCTGACACCATC
787	artQ	AAGCTTTGCTCGAAGAAACTATGGCGCTGGTCAGTTTGATTAGTGTGAATGATTTAATGCTGCAAACAAAAAGCATCGCTACTTGTATGGACCGGGTCATCTGACACCATC
788	artQ	AAGCTTTGCTCGAAGAAACTATGTGCTGAAAGATACCGCGCTGGTCAGTTTGATTAGTGTGAATGATTTAATGCTGCAAACAATGTATGGACCGGGTCATCTGACACCATC
789	ascB	AAGCTTTGCTCGAAGAAACTATGCCAGAACCTGCTTTGAAGCATTTGATGGTCTGGTGAAATACTGGCTAACCTTCAATGAAATGTATGGACCGGGTCATCTGACACCATC
790	ascB	AAGCTTTGCTCGAAGAAACTATGGGTGAAATACTGGCTAACCTTCAATGAAATCAACATTATGTTGCATAGCCCGTTCTCCGGTGTATGGACCGGGTCATCTGACACCATC
791	ascB	AAGCTTTGCTCGAAGAAACTATGTATCACCATGAATATGATGTACGATCGTTATCAGAAGCCGCTGTTTCTGGTGGAAAACGGTGTATGGACCGGGTCATCTGACACCATC
792	ascB	AAGCTTTGCTCGAAGAAACTATGAAATCACGCCCAATCAGCAGGGCATTGCTTTTTATCGTTCTGTCTTTGAAGAGTGTAAAATGTATGGACCGGGTCATCTGACACCATC
793	ascB	AAGCTTTGCTCGAAGAAACTATGGGCGATGATGAAATCCTGAAAAACACCGTCGATTTTGTCTCTTTCAGCTATTACGCCTCTGTATGGACCGGGTCATCTGACACCATC
794	ascF	AAGCTTTGCTCGAAGAAACTATGGTACGTAGTGACAACCAGTGTCAGGTGATTATCGGCAATACCGTTTCACAAGCCTTTCAGTGTATGGACCGGGTCATCTGACACCATC
795	ascF	AAGCTTTGCTCGAAGAAACTATGGGTTGCGCTTTGTTATCAAAGATGATGCACTTATCGACAGCCCGACGTTAAAAACCATTGTATGGACCGGGTCATCTGACACCATC
796	ascF	AAGCTTTGCTCGAAGAAACTATGGTACGTAGTGACAACCAGTGTCAGGTGATTATCGGCAATACCGTTTCACAAGCCTTTCTGTATGGACCGGGTCATCTGACACCATC
797	ascF	AAGCTTTGCTCGAAGAAACTATGGTAGTGACAACCAGTGTCAGGTGATTATCGGCAATACCGTTTCACAAGCCTTTCAGGAAGTGTATGGACCGGGTCATCTGACACCATC
798	ascF	AAGCTTTGCTCGAAGAAACTATGCTTTGTTATCAAAGATGATGCACTTATCGACAGCCCGACGTTAAAAACCATCCCCGGTGTATGGACCGGGTCATCTGACACCATC
799	ascG	AAGCTTTGCTCGAAGAAACTATGGGGCTGGTAGTGACCAACACGCTTTACCACGGCATTTATTTTAGTGAATTACTCTTTCATTGTATGGACCGGGTCATCTGACACCATC
800	ascG	AAGCTTTGCTCGAAGAAACTATGGTAGTGACCAACACGCTTTACCACGGCATTTATTTTAGTGAATTACTCTTTCATGCCGCGTGTATGGACCGGGTCATCTGACACCATC
801	ascG	AAGCTTTGCTCGAAGAAACTATGAATTCCGGTGACTGAGATGATTCAGGAAATTATTGGACGGCTGATTTTTATGCTCGATGGTGTATGGACCGGGTCATCTGACACCATC
802	ascG	AAGCTTTGCTCGAAGAAACTATGTCTCCAGCGTAAAAATTCCGGTGACTGAGATGATTCAGGAAATTATTGGACGGCTGATTTTGTATGGACCGGGTCATCTGACACCATC
803	ascG	AAGCTTTGCTCGAAGAAACTATGCTCTCCAGCGTAAAAATTCCGGTGACTGAGATGATTCAGGAAATTATTGGACGGCTGATTTGTATGGACCGGGTCATCTGACACCATC
804	asd	AAGCTTTGCTCGAAGAAACTATGTTCACTATTAAATTGAAAAAAGATGTGTCTATTCCGACCGTGGAAGAACTGCTGGCTGCGTGTATGGACCGGGTCATCTGACACCATC
805	asd	AAGCTTTGCTCGAAGAAACTATGTTAAATAATGGCATCAGGACTTTTGTTGGCGGTAACTGTACCGTAAGCCTGATGTTGATGTGTATGGACCGGGTCATCTGACACCATC
806	asd	AAGCTTTGCTCGAAGAAACTATGATTATACCAACGAAATCTATCCAAAGCTTCGTGAAAGCGGATGGCAAGGTTACTGGATTGTGTATGGACCGGGTCATCTGACACCATC
807	asd	AAGCTTTGCTCGAAGAAACTATGGTCATTACCGACGGATTAAATAATGGCATCAGGACTTTTGTTGGCGGTAACTGTACCGTATGTATGGACCGGGTCATCTGACACCATC
808	asd	AAGCTTTGCTCGAAGAAACTATGTTATACCAACGAAATCTATCCAAAGCTTCGTGAAAGCGGATGGCAAGGTTACTGGATTGATGTATGGACCGGGTCATCTGACACCATC
809	aslA	AAGCTTTGCTCGAAGAAACTATGCACGCGTATATGGAGATCCTGAAAAAATATCCACCACGCGCGCAGATTAAATCTGACTAATGTATGGACCGGGTCATCTGACACCATC
810	aslA	AAGCTTTGCTCGAAGAAACTATGGCGACTGCATGGTGGAGATGAACGATGTGTTCGCTAATCTGTATAAAACACTGGAGAAAATGTATGGACCGGGTCATCTGACACCATC
811	aslA	AAGCTTTGCTCGAAGAAACTATGGATGAGTTCAAGTATCACGTCCTGATTCAGCAACCTTACGCTTATACCCAGAGCGGATATTGTATGGACCGGGTCATCTGACACCATC
812	aslA	AAGCTTTGCTCGAAGAAACTATGGACTTTCGTTTACTGGAAAGGGATGATCCAACCGCGTAAATCTGACGGTATTGTCGATCTGTATGGACCGGGTCATCTGACACCATC
813	aslA	AAGCTTTGCTCGAAGAAACTATGGAACGTTGGCTTTGATGATTTCCGTGGCTTTAACTCGGTGTCTGATATGTACACCGAATGTGTATGGACCGGGTCATCTGACACCATC
814	aslB	AAGCTTTGCTCGAAGAAACTATGGAATTATTTGTGTGCCGGGTATCAGCGTTATTTCCGCCATCTACCGCCATATCTTAAAGTGTATGGACCGGGTCATCTGACACCATC
815	aslB	AAGCTTTGCTCGAAGAAACTATGTATGTTTATCCGCAATATCGGCTGGGGAATATGCACCAGCAAACAATTGCAGAAATGATCTGTATGGACCGGGTCATCTGACACCATC
816	aslB	AAGCTTTGCTCGAAGAAACTATGCAATTGCAGAAATGATCGATTCCCCGCAACAGCAGGCGTTTGGTGAAGATAAATTTAAGTGTATGGACCGGGTCATCTGACACCATC
817	aslB	AAGCTTTGCTCGAAGAAACTATGGATATTCGACCACTGGATCAAACGCGACGTCGGCAAGATTTTCGTGATGAATATCGAATGTGTATGGACCGGGTCATCTGACACCATC
818	aslB	AAGCTTTGCTCGAAGAAACTATGCATCATTTTCTTGTTGGTTTATCGCTGGATGGCCCGCCTGAGATCCACAATCAATATCTGTATGGACCGGGTCATCTGACACCATC
819	asmA	AAGCTTTGCTCGAAGAAACTATGGCTATTGAACAAATTAACTGGCAGTTGCAGGGTGCCGATTTACCAAAACAAGGTATTCAGTGTATGGACCGGGTCATCTGACACCATC
820	asmA	AAGCTTTGCTCGAAGAAACTATGCGAGCGGAATAAAGATTCCCGTAATGGCAAAGATGTGAAGAAGTTGCTGGAGAAGATGTATGTATGGACCGGGTCATCTGACACCATC
821	asmA	AAGCTTTGCTCGAAGAAACTATGGCGATCTCACGATATCCCTTAACGGTACGGTAGATGCTTCTGATTATCCGCATGATTTAATGTATGGACCGGGTCATCTGACACCATC
822	asmA	AAGCTTTGCTCGAAGAAACTATGCTTTCATTTAACCAAATTAGTTTGACCGCCAATGATAGTACGCTAAGCGGGCAAGCACAGTGTATGGACCGGGTCATCTGACACCATC
823	asmA	AAGCTTTGCTCGAAGAAACTATGGGTACCATTCTGAAGGCGTTTAACTATCCGATTTCGTTGACCGGAAAAATGTCACTGGTGTATGGACCGGGTCATCTGACACCATC
824	asnA	AAGCTTTGCTCGAAGAAACTATGCCGCTTACATTGCCAAACAACGTCAAATTAGCTTCGTGAAATCTCACTTTTCTCGTCAACTGTATGGACCGGGTCATCTGACACCATC
825	asnA	AAGCTTTGCTCGAAGAAACTATGACAACGTCAAATTAGCTTCGTGAAATCTCACTTTTCTCGTCAACTGGAAGAACGTCTGGGTGTATGGACCGGGTCATCTGACACCATC
826	asnA	AAGCTTTGCTCGAAGAAACTATGACCGCTTACATTGCCAAACAACGTCAAATTAGCTTCGTGAAATCTCACTTTTCTCGTCATGTATGGACCGGGTCATCTGACACCATC
827	asnA	AAGCTTTGCTCGAAGAAACTATGAACAACGTCAAATTAGCTTCGTGAAATCTCACTTTTCTCGTCAACTGGAAGAACGTCTGGTGTATGGACCGGGTCATCTGACACCATC
828	asnA	AAGCTTTGCTCGAAGAAACTATGAAACCGCTTACATTGCCAAACAACGTCAAATTAGCTTCGTGAAATCTCACTTTTCTCGTCTGTATGGACCGGGTCATCTGACACCATC
829	asnB	AAGCTTTGCTCGAAGAAACTATGGTGTTCAATTTTTGGCGTATTCGATATCAAAACAGACGCAGTTGAGCTGCGTAAGAAAGCTGTATGGACCGGGTCATCTGACACCATC
830	asnB	AAGCTTTGCTCGAAGAAACTATGGTGTGCTGCTTTCTGGTGGTCTGGATTCCTCAATTATTTCCGCTATCACCAAGAAATACTGTATGGACCGGGTCATCTGACACCATC
831	asnB	AAGCTTTGCTCGAAGAAACTATGATTAAAATGGTGCTGTCCGGTGAAGGTTCTGATGAAGTGTTCGGCGGTTATCTTTACTTCTGTATGGACCGGGTCATCTGACACCATC
832	asnB	AAGCTTTGCTCGAAGAAACTATGCAACCTCTCTACAACCAACAAAAAACCCACGTACTGGCGGTAAACGGTGAAATCTACAACTGTATGGACCGGGTCATCTGACACCATC
833	asnB	AAGCTTTGCTCGAAGAAACTATGGAAGATTCAGTTAAAAGCCATCTGATGTCTGATGTGCCTTACGGTGTGCTGCTTTCTGTGTATGGACCGGGTCATCTGACACCATC
834	asnC	AAGCTTTGCTCGAAGAAACTATGCTACAGCATCTTTATAAAAGTGATGTGCCGTTCGATCGACGCTCTCCAGCATGTACTTATTGTATGGACCGGGTCATCTGACACCATC
835	asnC	AAGCTTTGCTCGAAGAAACTATGTACAGCATCTTTATAAAAGTGATGTGCCGTTCGATCGACGCTCTCCAGCATGTACTTATCTGTATGGACCGGGTCATCTGACACCATC
836	asnC	AAGCTTTGCTCGAAGAAACTATGGAAAGCCTTGATGAAGTCACTGAAGCCTATTACACAACCGGCCACTACAGCATCTTTATATGTATGGACCGGGTCATCTGACACCATC
837	asnC	AAGCTTTGCTCGAAGAAACTATGACAAGATCCAAACAATTGATGAAATTCAGTCCACCGAGACATTGATCGTCCTGCAAAACCTGTATGGACCGGGTCATCTGACACCATC
838	asnC	AAGCTTTGCTCGAAGAAACTATGTCAACAAGATCCAAACAATTGATGAAATTCAGTCCACCGAGACATTGATCGTCCTGCAAATGTATGGACCGGGTCATCTGACACCATC
839	asnS	AAGCTTTGCTCGAAGAAACTATGAAAGTGGATTTCGACAAAGACTTCTTTGGTAAAGAGTCTTTCCTGACCGTATCTGGCCAGTGTATGGACCGGGTCATCTGACACCATC
840	asnS	AAGCTTTGCTCGAAGAAACTATGAGGGCAAAGTGGATTTCGACAAAGACTTCTTTGGTAAAGAGTCTTTCCTGACCGTATCTGTGTATGGACCGGGTCATCTGACACCATC
841	asnS	AAGCTTTGCTCGAAGAAACTATGCAGGGCAAAGTGGATTTCGACAAAGACTTCTTTGGTAAAGAGTCTTTCCTGACCGTATCTTGTATGGACCGGGTCATCTGACACCATC
842	asnS	AAGCTTTGCTCGAAGAAACTATGATCAGGGCAAAGTGGATTTCGACAAAGACTTCTTTGGTAAAGAGTCTTTCCTGACCGTATTGTATGGACCGGGTCATCTGACACCATC
843	asnS	AAGCTTTGCTCGAAGAAACTATGCAAAGTGGATTTCGACAAAGACTTCTTTGGTAAAGAGTCTTTCCTGACCGTATCTGGCCATGTATGGACCGGGTCATCTGACACCATC
844	aspA	AAGCTTTGCTCGAAGAAACTATGCTATGGCAAACAAAGAGCTGCAAACCATTCCTAAAAGTGTAGCGAATGCCATCATTGCTGTATGGACCGGGTCATCTGACACCATC
845	aspA	AAGCTTTGCTCGAAGAAACTATGTAAAGTAAACCCGGTTGTTCCGGAAGTGGTTAACCAGGTATGCTTCAAAGTCATCGGTAATGTATGGACCGGGTCATCTGACACCATC
846	aspA	AAGCTTTGCTCGAAGAAACTATGAAAGAAGAAGTGAAAAACATCCAACGTACCGCTGAACTGCTGCTGGAAGTTAACCTTGTGTATGGACCGGGTCATCTGACACCATC
847	aspA	AAGCTTTGCTCGAAGAAACTATGGATTAAGCTGGTAGATGCGATTAACCAACTGCGTGAAGGCTTTGAACGTAAAGCTGTCTGTATGGACCGGGTCATCTGACACCATC
848	aspA	AAGCTTTGCTCGAAGAAACTATGAATATCAGTACCTGAACCCGAACGACCATGTTAACAAATGTCAGTCCACTAACGACGCTGTATGGACCGGGTCATCTGACACCATC
849	aspC	AAGCTTTGCTCGAAGAAACTATGTTATGATGCGGAAAATCACACTCTTGACTTCGATGCACTGATTAACAGCCTGAATGAAGCTGTATGGACCGGGTCATCTGACACCATC
850	aspC	AAGCTTTGCTCGAAGAAACTATGCTCTGCAGGTCTGGAAGTTCGTGAATACGCTTATTATGATGCGGAAAATCACACTCTTGATGTATGGACCGGGTCATCTGACACCATC
851	aspC	AAGCTTTGCTCGAAGAAACTATGTGCAGGTCTGGAAGTTCGTGAATACGCTTATTATGATGCGGAAAATCACACTCTTGACTTTGTATGGACCGGGTCATCTGACACCATC
852	aspC	AAGCTTTGCTCGAAGAAACTATGCCGAACCATAAGAGCGTCTTTAACTCTGCAGGTCTGGAAGTTCGTGAATACGCTTATTATTGTATGGACCGGGTCATCTGACACCATC
853	aspC	AAGCTTTGCTCGAAGAAACTATGGTACTGACCAGCGTGAAAAAGGCTGAACAGTATCTGCTCGAAAATGAAACCACCAAAAATTGTATGGACCGGGTCATCTGACACCATC
854	aspS	AAGCTTTGCTCGAAGAAACTATGTACGGTAACTTCGTTAAAATCTACGGCGCGAAAGGTCTGGCTTACATCAAAGTTAACGAATGTATGGACCGGGTCATCTGACACCATC
855	aspS	AAGCTTTGCTCGAAGAAACTATGGTACGTATCCATAATGGTGATATGCAGCAGACGGTGTTTGGTATTCTGGGTATCAACGAATGTATGGACCGGGTCATCTGACACCATC
856	aspS	AAGCTTTGCTCGAAGAAACTATGCAGTACGTATCCATAATGGTGATATGCAGCAGACGGTGTTTGGTATTCTGGGTATCAACGTGTATGGACCGGGTCATCTGACACCATC
857	aspS	AAGCTTTGCTCGAAGAAACTATGGTATCCATAATGGTGATATGCAGCAGACGGTGTTTGGTATTCTGGGTATCAACGAAGAGGTGTATGGACCGGGTCATCTGACACCATC
858	aspS	AAGCTTTGCTCGAAGAAACTATGTTGTTCAAACAGCTGCTGATGATGTCCGGTTTTGACCGTTACTATCAGATCGTTAAATGCTGTATGGACCGGGTCATCTGACACCATC
859	asr	AAGCTTTGCTCGAAGAAACTATGAGGCGGCTAAAAAGCATCATAAAAATACGAAAGCTGAACAGAAAGCCCCTGAACAAAAAGTGTATGGACCGGGTCATCTGACACCATC
860	asr	AAGCTTTGCTCGAAGAAACTATGCGGCTAAAAAGCATCATAAAAATACGAAAGCTGAACAGAAAGCCCCTGAACAAAAAGCGCTGTATGGACCGGGTCATCTGACACCATC
861	asr	AAGCTTTGCTCGAAGAAACTATGGCGGCTAAAAAGCATCATAAAAATACGAAAGCTGAACAGAAAGCCCCTGAACAAAAAGCGTGTATGGACCGGGTCATCTGACACCATC
862	asr	AAGCTTTGCTCGAAGAAACTATGCAGGCGGCTAAAAAGCATCATAAAAATACGAAAGCTGAACAGAAAGCCCCTGAACAAAATGTATGGACCGGGTCATCTGACACCATC
863	asr	AAGCTTTGCTCGAAGAAACTATGAAAAAGCATCATAAAAATACGAAAGCTGAACAGAAAGCCCCTGAACAAAAAGCGCAGGCTGTATGGACCGGGTCATCTGACACCATC
864	astA	AAGCTTTGCTCGAAGAAACTATGCGCTTTATGTTTATGGCGGCTTTTCGCGACAAGTTTAATGACAAAGTGGTTGCTGAAATGTGTATGGACCGGGTCATCTGACACCATC
865	astA	AAGCTTTGCTCGAAGAAACTATGAAAGGCATTTATTGCAGAACTGATGCCGAAACATCCGATCTATACCCACTTTTTATCCCATGTATGGACCGGGTCATCTGACACCATC
866	astA	AAGCTTTGCTCGAAGAAACTATGATTTATTGCAGAACTGATGCCGAAACATCCGATCTATACCCACTTTTTATCCCAGGAAGCTGTATGGACCGGGTCATCTGACACCATC
867	astA	AAGCTTTGCTCGAAGAAACTATGGGCATTTATTGCAGAACTGATGCCGAAACATCCGATCTATACCCACTTTTTATCCCAGGTGTATGGACCGGGTCATCTGACACCATC
868	astA	AAGCTTTGCTCGAAGAAACTATGTTTATTGCAGAACTGATGCCGAAACATCCGATCTATACCCACTTTTTATCCCAGGAAGCCTGTATGGACCGGGTCATCTGACACCATC
869	astB	AAGCTTTGCTCGAAGAAACTATGACTGAATCGCTGTTAAAAGCGATTTTTAACGACGAAGAGAAATTTAGCGTCCATTCGGCGTGTATGGACCGGGTCATCTGACACCATC
870	astB	AAGCTTTGCTCGAAGAAACTATGATAGAAGTTCCGGCAACTCAGGTTTCCGTGTCTGATACGGTGTCTACCTATCTGTTTAACTGTATGGACCGGGTCATCTGACACCATC
871	astB	AAGCTTTGCTCGAAGAAACTATGGAATCGCTGTTAAAAGCGATTTTTAACGACGAAGAGAAATTTAGCGTCCATTCGGCGTTGTGTATGGACCGGGTCATCTGACACCATC
872	astB	AAGCTTTGCTCGAAGAAACTATGGGAAGCGCCCGTCACTGAATCGCTGTTAAAAGCGATTTTTAACGACGAAGAGAAATTTAGTGTATGGACCGGGTCATCTGACACCATC
873	astB	AAGCTTTGCTCGAAGAAACTATGGTTATCTCAATGAACTCCTTGCCGCTGACAACCCGATTAGCGAACTAAAAGTCTTTGATTTGTATGGACCGGGTCATCTGACACCATC
874	astC	AAGCTTTGCTCGAAGAAACTATGAGAGATGCTTAATGGCGTTAAACAGCGTCACGACTGGTTTGTTGAGCGTCTTAATACTATTGTATGGACCGGGTCATCTGACACCATC
875	astC	AAGCTTTGCTCGAAGAAACTATGACAGCGTCACGACTGGTTTGTTGAGCGTCTTAATACTATTAATCACCGCTATGGTTTGTTTGTATGGACCGGGTCATCTGACACCATC
876	astC	AAGCTTTGCTCGAAGAAACTATGAACAGCGTCACGACTGGTTTGTTGAGCGTCTTAATACTATTAATCACCGCTATGGTTTGTTGTATGGACCGGGTCATCTGACACCATC
877	astC	AAGCTTTGCTCGAAGAAACTATGTGTTGAGCGTCTTAATACTATTAATCACCGCTATGGTTTGTTCAGTGAAGTTCGCGGCTTTGTATGGACCGGGTCATCTGACACCATC
878	astC	AAGCTTTGCTCGAAGAAACTATGTTGTTGAGCGTCTTAATACTATTAATCACCGCTATGGTTTGTTCAGTGAAGTTCGCGGCTTGTATGGACCGGGTCATCTGACACCATC
879	astD	AAGCTTTGCTCGAAGAAACTATGCGAAGTGACGGCGATGATCAATAAAATCGCGATATCAATTAAGGCGTATCACGTTCGTACTGTATGGACCGGGTCATCTGACACCATC
880	astD	AAGCTTTGCTCGAAGAAACTATGGAAGTGACGGCGATGATCAATAAAATCGCGATATCAATTAAGGCGTATCACGTTCGTACCTGTATGGACCGGGTCATCTGACACCATC
881	astD	AAGCTTTGCTCGAAGAAACTATGGTTATGATACTTTCGATGAAGCGATTCGAATGGCGAATAACACTCGCTTCGGACTCTCTTGTATGGACCGGGTCATCTGACACCATC
882	astD	AAGCTTTGCTCGAAGAAACTATGTATGATACTTTCGATGAAGCGATTCGAATGGCGAATAACACTCGCTTCGGACTCTCTTGTGTATGGACCGGGTCATCTGACACCATC
883	astD	AAGCTTTGCTCGAAGAAACTATGAAGTGACGGCGATGATCAATAAAATCGCGATATCAATTAAGGCGTATCACGTTCGTACCGTGTATGGACCGGGTCATCTGACACCATC
884	astE	AAGCTTTGCTCGAAGAAACTATGATGGATAATTTTCTTGCTCTGACCTTAACGGGTAAAAAACCGGTTATCACCGAGCGAGAATGTATGGACCGGGTCATCTGACACCATC
885	astE	AAGCTTTGCTCGAAGAAACTATGCGTAACCCATGATGTAGAGTATGTGTTATTCCCTAATCCGTTGGTAGCGTTGGGATTACGTGTATGGACCGGGTCATCTGACACCATC
886	astE	AAGCTTTGCTCGAAGAAACTATGACCGTAACCCATGATGTAGAGTATGTGTTATTCCCTAATCCGTTGGTAGCGTTGGGATTATGTATGGACCGGGTCATCTGACACCATC
887	astE	AAGCTTTGCTCGAAGAAACTATGTACCGTAACCCATGATGTAGAGTATGTGTTATTCCCTAATCCGTTGGTAGCGTTGGGATTTGTATGGACCGGGTCATCTGACACCATC
888	astE	AAGCTTTGCTCGAAGAAACTATGTTACCGTAACCCATGATGTAGAGTATGTGTTATTCCCTAATCCGTTGGTAGCGTTGGGATTGTATGGACCGGGTCATCTGACACCATC
889	atoA	AAGCTTTGCTCGAAGAAACTATGCTTAGGGATCGGTTTACCCACAATGGTCGCCAATTATTTACCGGAGGGTATTCATATCACTGTATGGACCGGGTCATCTGACACCATC
890	atoA	AAGCTTTGCTCGAAGAAACTATGTTAACTTAGGGATCGGTTTACCCACAATGGTCGCCAATTATTTACCGGAGGGTATTCATATGTATGGACCGGGTCATCTGACACCATC
891	atoA	AAGCTTTGCTCGAAGAAACTATGGTGATGGTGACATCGTTAACTTAGGGATCGGTTTACCCACAATGGTCGCCAATTATTTACTGTATGGACCGGGTCATCTGACACCATC
892	atoA	AAGCTTTGCTCGAAGAAACTATGTGATGGTGACATCGTTAACTTAGGGATCGGTTTACCCACAATGGTCGCCAATTATTTACCTGTATGGACCGGGTCATCTGACACCATC
893	atoA	AAGCTTTGCTCGAAGAAACTATGCGTGATGGTGACATCGTTAACTTAGGGATCGGTTTACCCACAATGGTCGCCAATTATTTATGTATGGACCGGGTCATCTGACACCATC
894	atoB	AAGCTTTGCTCGAAGAAACTATGGCCATTGAACGTGCAAAAATCGATTCACAACACGTTGATGAAGTGATTATGGGTAACGTGTGTATGGACCGGGTCATCTGACACCATC
895	atoB	AAGCTTTGCTCGAAGAAACTATGACAGTAATTAAAGCCGCCATTGAACGTGCAAAAATCGATTCACAACACGTTGATGAAGTGTGTATGGACCGGGTCATCTGACACCATC
896	atoB	AAGCTTTGCTCGAAGAAACTATGGTAAATGTTGTCACTCGAAAGAAAACCTTCGTCTTCAGTCAAGACGAATTCCCGAAAGCGTGTATGGACCGGGTCATCTGACACCATC
897	atoB	AAGCTTTGCTCGAAGAAACTATGAATCGTCCCGGTAAATGTTGTCACTCGAAAGAAAACCTTCGTCTTCAGTCAAGACGAATTTGTATGGACCGGGTCATCTGACACCATC
898	atoB	AAGCTTTGCTCGAAGAAACTATGAAATCGTCCCGGTAAATGTTGTCACTCGAAAGAAAACCTTCGTCTTCAGTCAAGACGAATTGTATGGACCGGGTCATCTGACACCATC
899	atoC	AAGCTTTGCTCGAAGAAACTATGTTCTACAGGAACGGGAATTTGAACGGATTGGCGGCCATCAGACCATAAAAGTTGATATCTGTATGGACCGGGTCATCTGACACCATC
900	atoC	AAGCTTTGCTCGAAGAAACTATGCTGCGCGATCGCCGGGAAGATATTTCCCTGTTAGCTAATCACTTTTTGCAAAAATTCAGTGTATGGACCGGGTCATCTGACACCATC
901	atoC	AAGCTTTGCTCGAAGAAACTATGGTAGTGAGAATCAGCGCGATATTATCGACATCGATCCGATGGCAATGTCACTGCTTACTGTATGGACCGGGTCATCTGACACCATC
902	atoC	AAGCTTTGCTCGAAGAAACTATGCTTTAATGCTGGGCATCAGTCGCCGTGCATTGATGTATAAACTCCAGGAATACGGTATCTGTATGGACCGGGTCATCTGACACCATC
903	atoC	AAGCTTTGCTCGAAGAAACTATGGCTACGCTGCGGAGCCTTCGACTATGTTATTAAACCGTTTGATCTCGATGAGTTGAATTGTATGGACCGGGTCATCTGACACCATC
904	atoD	AAGCTTTGCTCGAAGAAACTATGTGGTTGAAGCATTACTGGAATCTGGTGTTCGCGACCTGACATTGATAGCCAATGATACTGTATGGACCGGGTCATCTGACACCATC
905	atoD	AAGCTTTGCTCGAAGAAACTATGCCTGGTTGAAGCATTACTGGAATCTGGTGTTCGCGACCTGACATTGATAGCCAATGATACTGTATGGACCGGGTCATCTGACACCATC
906	atoD	AAGCTTTGCTCGAAGAAACTATGCTGGTTGAAGCATTACTGGAATCTGGTGTTCGCGACCTGACATTGATAGCCAATGATACCTGTATGGACCGGGTCATCTGACACCATC
907	atoD	AAGCTTTGCTCGAAGAAACTATGTGGTTGAAGCATTACTGGAATCTGGTGTTCGCGACCTGACATTGATAGCCAATGATATGTATGGACCGGGTCATCTGACACCATC
908	atoD	AAGCTTTGCTCGAAGAAACTATGGGTTGAAGCATTACTGGAATCTGGTGTTCGCGACCTGACATTGATAGCCAATGATACCTGTATGGACCGGGTCATCTGACACCATC
909	atoE	AAGCTTTGCTCGAAGAAACTATGTCTGACGTGGTGAGTATCGATCCAAAACTACTCATGGAAGAGGCTGATTTTCAAAAGCAGTGTATGGACCGGGTCATCTGACACCATC
910	atoE	AAGCTTTGCTCGAAGAAACTATGGATACTCTGTTCAGTGGTTTTAACATTTTCATCACTGTGGCGTTGATTGTGGTGATGCCATGTATGGACCGGGTCATCTGACACCATC
911	atoE	AAGCTTTGCTCGAAGAAACTATGCATCAATGTTGCGAACAAAGACACCTTCCCGGTAATGACCTTTTTTAGTTCTGCACTGATTGTATGGACCGGGTCATCTGACACCATC
912	atoE	AAGCTTTGCTCGAAGAAACTATGGACGTGGTGAGTATCGATCCAAAACTACTCATGGAAGAGGCTGATTTTCAAAAGCAGCTATGTATGGACCGGGTCATCTGACACCATC
913	atoE	AAGCTTTGCTCGAAGAAACTATGATCAATGTTGCGAACAAAGACACCTTCCCGGTAATGACCTTTTTTAGTTCTGCACTGATTTGTATGGACCGGGTCATCTGACACCATC
914	atoS	AAGCTTTGCTCGAAGAAACTATGTATATGAAGTGGATTTATCCACGCCGCTTACGCAATCAAATGATCCTGATGGCAATCCTGTATGGACCGGGTCATCTGACACCATC
915	atoS	AAGCTTTGCTCGAAGAAACTATGCAAAATGCTGGATGCGATAATCACCTACGCGCCTTCAGCGCTATATCAGAATAATGTCTGTATGGACCGGGTCATCTGACACCATC
916	atoS	AAGCTTTGCTCGAAGAAACTATGGCGCCAACAAACCAGTGACCCAATACATCAGGAATATCTGTCCGTAGTACTCAAAGAATGTATGGACCGGGTCATCTGACACCATC
917	atoS	AAGCTTTGCTCGAAGAAACTATGGAATTAACCGAAGATATTCGCCGCCAGGCCTGGAAAATGGATGTGAGGATTATCATTGTGTATGGACCGGGTCATCTGACACCATC
918	atoS	AAGCTTTGCTCGAAGAAACTATGGAAATGATAGGTGCTTTGGTGATTTTCTCTGATTTAACTGCCCGCAAAGAAACCCAGCTGTATGGACCGGGTCATCTGACACCATC
919	atpA	AAGCTTTGCTCGAAGAAACTATGGTATCAAATGTATCTATGTCGCTATCGGCCAGAAAGCGTCCACCATTTCTAACGTGGTACTGTATGGACCGGGTCATCTGACACCATC
920	atpA	AAGCTTTGCTCGAAGAAACTATGTGTTGTGAGTGAAGCTCACAACGAAGGTACTATTGTTTCTGTAAGTGACGGTGTTATCCGTGTATGGACCGGGTCATCTGACACCATC
921	atpA	AAGCTTTGCTCGAAGAAACTATGGATTCCGGTATCAAATGTATCTATGTCGCTATCGGCCAGAAAGCGTCCACCATTTCTAACTGTATGGACCGGGTCATCTGACACCATC
922	atpA	AAGCTTTGCTCGAAGAAACTATGGTTGTGAGTGAAGCTCACAACGAAGGTACTATTGTTTCTGTAAGTGACGGTGTTATCCGCTGTATGGACCGGGTCATCTGACACCATC
923	atpA	AAGCTTTGCTCGAAGAAACTATGGTGAAGCTCACAACGAAGGTACTATTGTTTCTGTAAGTGACGGTGTTATCCGCATTCACGTGTATGGACCGGGTCATCTGACACCATC
924	atpB	AAGCTTTGCTCGAAGAAACTATGCGCTGTCTATGGCACTGGGCGTATTTATCCTGATTCTGTTCTACAGCATCAAAATGAAAGTGTATGGACCGGGTCATCTGACACCATC
925	atpB	AAGCTTTGCTCGAAGAAACTATGGCTGTCTATGGCACTGGGCGTATTTATCCTGATTCTGTTCTACAGCATCAAAATGAAAGGTGTATGGACCGGGTCATCTGACACCATC
926	atpB	AAGCTTTGCTCGAAGAAACTATGCTGTCTATGGCACTGGGCGTATTTATCCTGATTCTGTTCTACAGCATCAAAATGAAAGGCTGTATGGACCGGGTCATCTGACACCATC
927	atpB	AAGCTTTGCTCGAAGAAACTATGTGTCTATGGCACTGGGCGTATTTATCCTGATTCTGTTCTACAGCATCAAAATGAAAGGCATGTATGGACCGGGTCATCTGACACCATC
928	atpB	AAGCTTTGCTCGAAGAAACTATGACGCTGTCTATGGCACTGGGCGTATTTATCCTGATTCTGTTCTACAGCATCAAAATGAAATGTATGGACCGGGTCATCTGACACCATC
929	atpC	AAGCTTTGCTCGAAGAAACTATGATTAAGCCTGGTATGATTCGCATCGTGAAACAGCACGGTCACGAAGAGTTTATCTATCTTGTATGGACCGGGTCATCTGACACCATC
930	atpC	AAGCTTTGCTCGAAGAAACTATGTTAAGCCTGGTATGATTCGCATCGTGAAACAGCACGGTCACGAAGAGTTTATCTATCTGTTGTATGGACCGGGTCATCTGACACCATC
931	atpC	AAGCTTTGCTCGAAGAAACTATGCCATTAAGCCTGGTATGATTCGCATCGTGAAACAGCACGGTCACGAAGAGTTTATCTATTGTATGGACCGGGTCATCTGACACCATC
932	atpC	AAGCTTTGCTCGAAGAAACTATGTAAGCCTGGTATGATTCGCATCGTGAAACAGCACGGTCACGAAGAGTTTATCTATCTGTCTGTATGGACCGGGTCATCTGACACCATC
933	atpC	AAGCTTTGCTCGAAGAAACTATGTAAGCCTGGTATGATTCGCATCGTGAAACAGCACGGTCACGAAGAGTTTATCTATCTGTGTATGGACCGGGTCATCTGACACCATC
934	atpD	AAGCTTTGCTCGAAGAAACTATGGAACTGAAAGACATCATCGCCATCCTGGGTATGGATGAACTGTCTGAAGAAGACAAACTTGTATGGACCGGGTCATCTGACACCATC
935	atpD	AAGCTTTGCTCGAAGAAACTATGCTTCCTACGAAGAGCTGTCAAACTCTCAGGAACTGCTGGAAACCGGTATCAAAGTTATCTGTATGGACCGGGTCATCTGACACCATC
936	atpD	AAGCTTTGCTCGAAGAAACTATGAACTGAAAGACATCATCGCCATCCTGGGTATGGATGAACTGTCTGAAGAAGACAAACTGTGTATGGACCGGGTCATCTGACACCATC
937	atpD	AAGCTTTGCTCGAAGAAACTATGTATCAGGAACTGAAAGACATCATCGCCATCCTGGGTATGGATGAACTGTCTGAAGAAGATGTATGGACCGGGTCATCTGACACCATC
938	atpD	AAGCTTTGCTCGAAGAAACTATGGTTATCAGGAACTGAAAGACATCATCGCCATCCTGGGTATGGATGAACTGTCTGAAGAATGTATGGACCGGGTCATCTGACACCATC
939	atpE	AAGCTTTGCTCGAAGAAACTATGGTCAACCTGATCTGATTCCTCTGCTGCGTACTCAGTTCTTTATCGTTATGGGTCTGGTGTGTATGGACCGGGTCATCTGACACCATC
940	atpE	AAGCTTTGCTCGAAGAAACTATGATCTGATTCCTCTGCTGCGTACTCAGTTCTTTATCGTTATGGGTCTGGTGGATGCTATTGTATGGACCGGGTCATCTGACACCATC
941	atpE	AAGCTTTGCTCGAAGAAACTATGCTGATCTGATTCCTCTGCTGCGTACTCAGTTCTTTATCGTTATGGGTCTGGTGGATGCTATGTATGGACCGGGTCATCTGACACCATC
942	atpE	AAGCTTTGCTCGAAGAAACTATGGTACTCAGTTCTTTATCGTTATGGGTCTGGTGGATGCTATCCCGATGATCGCTGTAGGTCTGTATGGACCGGGTCATCTGACACCATC
943	atpE	AAGCTTTGCTCGAAGAAACTATGCGTCAACCTGATCTGATTCCTCTGCTGCGTACTCAGTTCTTTATCGTTATGGGTCTGTGTATGGACCGGGTCATCTGACACCATC
944	atpF	AAGCTTTGCTCGAAGAAACTATGCATGAAGTACGTATGGCCGCCATTAATGGCAGCCATCGAAAAACGTCAAAAAGAAATTGCTGTATGGACCGGGTCATCTGACACCATC
945	atpF	AAGCTTTGCTCGAAGAAACTATGGCATGAAGTACGTATGGCCGCCATTAATGGCAGCCATCGAAAAACGTCAAAAAGAAATTGTGTATGGACCGGGTCATCTGACACCATC
946	atpF	AAGCTTTGCTCGAAGAAACTATGCATGAAGTACGTATGGCCGCCATTAATGGCAGCCATCGAAAAACGTCAAAAAGAAATTGTATGGACCGGGTCATCTGACACCATC
947	atpF	AAGCTTTGCTCGAAGAAACTATGATGAAGTACGTATGGCCGCCATTAATGGCAGCCATCGAAAAACGTCAAAAAGAAATTTGTATGGACCGGGTCATCTGACACCATC
948	atpF	AAGCTTTGCTCGAAGAAACTATGATGAAGTACGTATGGCCGCCATTAATGGCAGCCATCGAAAAACGTCAAAAAGAAATTGCTGTATGGACCGGGTCATCTGACACCATC
949	atpG	AAGCTTTGCTCGAAGAAACTATGACGAAGGCCGTCTGGACAAGCTTTACATTGTCAGCAACAAATTTATTAACACCATGTCTCTGTATGGACCGGGTCATCTGACACCATC
950	atpG	AAGCTTTGCTCGAAGAAACTATGGACGAAGGCCGTCTGGACAAGCTTTACATTGTCAGCAACAAATTTATTAACACCATGTCTTGTATGGACCGGGTCATCTGACACCATC
951	atpG	AAGCTTTGCTCGAAGAAACTATGGGCATCAGATGATGATGATCTGAAACATAAATCCTGGGATTACCTGTACGAACCCGATCCTGTATGGACCGGGTCATCTGACACCATC
952	atpG	AAGCTTTGCTCGAAGAAACTATGAAGGCCGTCTGGACAAGCTTTACATTGTCAGCAACAAATTTATTAACACCATGTCTCAGGTGTATGGACCGGGTCATCTGACACCATC
953	atpG	AAGCTTTGCTCGAAGAAACTATGGCATCAGATGATGATGATCTGAAACATAAATCCTGGGATTACCTGTACGAACCCGATCCGTGTATGGACCGGGTCATCTGACACCATC
954	atpH	AAGCTTTGCTCGAAGAAACTATGTCTGTCACGCAAAGTTAAGCTGAATTGCAAAATCGATAAGTCTGTAATGGCAGGCGTTATTGTATGGACCGGGTCATCTGACACCATC
955	atpH	AAGCTTTGCTCGAAGAAACTATGTGCGATGGAAAAACGTCTGTCACGCAAAGTTAAGCTGAATTGCAAAATCGATAAGTCTGTTGTATGGACCGGGTCATCTGACACCATC
956	atpH	AAGCTTTGCTCGAAGAAACTATGACGCAAAGTTAAGCTGAATTGCAAAATCGATAAGTCTGTAATGGCAGGCGTTATCATCCGTGTATGGACCGGGTCATCTGACACCATC
957	atpH	AAGCTTTGCTCGAAGAAACTATGAAATTTCTGCTGCGATGGAAAAACGTCTGTCACGCAAAGTTAAGCTGAATTGCAAAATCGTGTATGGACCGGGTCATCTGACACCATC
958	atpH	AAGCTTTGCTCGAAGAAACTATGCGAAAATTTCTGCTGCGATGGAAAAACGTCTGTCACGCAAAGTTAAGCTGAATTGCAAAATGTATGGACCGGGTCATCTGACACCATC
959	atpI	AAGCTTTGCTCGAAGAAACTATGCTCTGCAATAAGCGGGGGCCTGGCAGTCTTTCTGCCTAACGTTTTGTTTATGATATTTTGTATGGACCGGGTCATCTGACACCATC
960	atpI	AAGCTTTGCTCGAAGAAACTATGCAATAAGCGGGGGCCTGGCAGTCTTTCTGCCTAACGTTTTGTTTATGATATTTGCTGTATGGACCGGGTCATCTGACACCATC
961	atpI	AAGCTTTGCTCGAAGAAACTATGGCAATAAGCGGGGGCCTGGCAGTCTTTCTGCCTAACGTTTTGTTTATGATATTTGTGTATGGACCGGGTCATCTGACACCATC
962	atpI	AAGCTTTGCTCGAAGAAACTATGTCTGCAATAAGCGGGGGCCTGGCAGTCTTTCTGCCTAACGTTTTGTTTATGATATTTGTGTATGGACCGGGTCATCTGACACCATC
963	atpI	AAGCTTTGCTCGAAGAAACTATGTCTCTGCAATAAGCGGGGGCCTGGCAGTCTTTCTGCCTAACGTTTTGTTTATGATATTTTGTATGGACCGGGTCATCTGACACCATC
964	avtA	AAGCTTTGCTCGAAGAAACTATGCACAGAATATTGCACTAACAAACGGCAGCCAGAGCGCGTTTTTCTACTTATTTAACCTGTTGTATGGACCGGGTCATCTGACACCATC
965	avtA	AAGCTTTGCTCGAAGAAACTATGCAGTTTAAATACCACGTCGATTTTGAGCATCTGCATATTGGCGAAGAAACCGGGATGATTTGTATGGACCGGGTCATCTGACACCATC
966	avtA	AAGCTTTGCTCGAAGAAACTATGCGAACCACAGAATATTGCACTAACAAACGGCAGCCAGAGCGCGTTTTTCTACTTATTTAATGTATGGACCGGGTCATCTGACACCATC
967	avtA	AAGCTTTGCTCGAAGAAACTATGGAATATTGCACTAACAAACGGCAGCCAGAGCGCGTTTTTCTACTTATTTAACCTGTTTGCTGTATGGACCGGGTCATCTGACACCATC
968	avtA	AAGCTTTGCTCGAAGAAACTATGCTGAAACAGTCATCAAACCGTTTTACTACCAGCGTGTTCAGGAAACTATCGCCATCATTCTGTATGGACCGGGTCATCTGACACCATC
969	azoR	AAGCTTTGCTCGAAGAAACTATGTGAGCAAGGTATTAGTTCTTAAATCCAGCATCCTGGCAGGGTACTCTCAGTCTAATCAGTTGTATGGACCGGGTCATCTGACACCATC
970	azoR	AAGCTTTGCTCGAAGAAACTATGGATGTATAACTTCAACATCTCGACTCAGTTGAAAAACTATTTTGACCTGGTTGCCCGCGCTGTATGGACCGGGTCATCTGACACCATC
971	azoR	AAGCTTTGCTCGAAGAAACTATGGGGTACTCTCAGTCTAATCAGTTGTCCGATTATTTTGTTGAACAATGGCGCGAAAAGCACTGTATGGACCGGGTCATCTGACACCATC
972	azoR	AAGCTTTGCTCGAAGAAACTATGGGTATTAGTTCTTAAATCCAGCATCCTGGCAGGGTACTCTCAGTCTAATCAGTTGTCCGATGTATGGACCGGGTCATCTGACACCATC
973	azoR	AAGCTTTGCTCGAAGAAACTATGAGGTATTAGTTCTTAAATCCAGCATCCTGGCAGGGTACTCTCAGTCTAATCAGTTGTCCGTGTATGGACCGGGTCATCTGACACCATC
974	bacA	AAGCTTTGCTCGAAGAAACTATGGTGGTATTGGGGCTGTTGTTCCACGACACGATTAAGTCATTGTTTAACCCGATAAATGTGTGTATGGACCGGGTCATCTGACACCATC
975	bacA	AAGCTTTGCTCGAAGAAACTATGGTTGTTCCACGACACGATTAAGTCATTGTTTAACCCGATAAATGTGATGTATGCGCTGGTTGTATGGACCGGGTCATCTGACACCATC
976	bacA	AAGCTTTGCTCGAAGAAACTATGTGTTGTTCCACGACACGATTAAGTCATTGTTTAACCCGATAAATGTGATGTATGCGCTGGTGTATGGACCGGGTCATCTGACACCATC
977	bacA	AAGCTTTGCTCGAAGAAACTATGGGGGCTGTTGTTCCACGACACGATTAAGTCATTGTTTAACCCGATAAATGTGATGTATGCTGTATGGACCGGGTCATCTGACACCATC
978	bacA	AAGCTTTGCTCGAAGAAACTATGGGGCTGTTGTTCCACGACACGATTAAGTCATTGTTTAACCCGATAAATGTGATGTATGCGTGTATGGACCGGGTCATCTGACACCATC
979	baeR	AAGCTTTGCTCGAAGAAACTATGGAAATTCGTCGTTTTTCTGACATTCCGATCGTGATGGTGACGGCAAAAATCGAAGAGATGTATGGACCGGGTCATCTGACACCATC
980	baeR	AAGCTTTGCTCGAAGAAACTATGAAATTCGTCGTTTTTCTGACATTCCGATCGTGATGGTGACGGCAAAAATCGAAGAGATTGTATGGACCGGGTCATCTGACACCATC
981	baeR	AAGCTTTGCTCGAAGAAACTATGGGAAATTCGTCGTTTTTCTGACATTCCGATCGTGATGGTGACGGCAAAAATCGAAGAGATTGTATGGACCGGGTCATCTGACACCATC
982	baeR	AAGCTTTGCTCGAAGAAACTATGAAATTCGTCGTTTTTCTGACATTCCGATCGTGATGGTGACGGCAAAAATCGAAGAGATCGTGTATGGACCGGGTCATCTGACACCATC
983	baeR	AAGCTTTGCTCGAAGAAACTATGGGAAATTCGTCGTTTTTCTGACATTCCGATCGTGATGGTGACGGCAAAAATCGAAGAGTGTATGGACCGGGTCATCTGACACCATC
984	baeS	AAGCTTTGCTCGAAGAAACTATGCGACCGTTTAATGCAGTTATTCAATAACTTACTGGAAAACAGCCTGCGCTACACTGACAGTGTATGGACCGGGTCATCTGACACCATC
985	baeS	AAGCTTTGCTCGAAGAAACTATGAGGTGTCAGTGACGATCAGCTACAAAAATTGTTTGAACGTTTTTATCGCACCGAAGGTTCTGTATGGACCGGGTCATCTGACACCATC
986	baeS	AAGCTTTGCTCGAAGAAACTATGACCGTATTTGGCGATCGCGACCGTTTAATGCAGTTATTCAATAACTTACTGGAAAACAGCTGTATGGACCGGGTCATCTGACACCATC
987	baeS	AAGCTTTGCTCGAAGAAACTATGGTGCGTATCAGTTTTGAGCGTGGCTTTATTGATTACATCAAGCATGGTAATGAACAGCGATGTATGGACCGGGTCATCTGACACCATC
988	baeS	AAGCTTTGCTCGAAGAAACTATGATCGCTTTGTCTTTCAGATCCTGCGTTCATTTGAACACGATAATTCGGAAGATAAACCCGTGTATGGACCGGGTCATCTGACACCATC
989	barA	AAGCTTTGCTCGAAGAAACTATGTTTATTGCTGAGTATCTTTTTCGTCGTGCATCGCTATAACGACTTGCAGCGTCAACTGTGTATGGACCGGGTCATCTGACACCATC
990	barA	AAGCTTTGCTCGAAGAAACTATGCAAACAAAACACGCTTTTGCCTGTAACCGATGAAAGTAAGCTGGCAATGACAGTCATGTGTATGGACCGGGTCATCTGACACCATC
991	barA	AAGCTTTGCTCGAAGAAACTATGGTGATTACACAAAAACTGGTTAATGAAATGGGCGGCGATATTTCGTTCCATAGCCAGCTGTATGGACCGGGTCATCTGACACCATC
992	barA	AAGCTTTGCTCGAAGAAACTATGTAAAGAAGAAGATTTGGAACCGGAGCTGCTGGAACTGTTGGACGAGATGGATAATGTCTGTATGGACCGGGTCATCTGACACCATC
993	barA	AAGCTTTGCTCGAAGAAACTATGTATGCTGCAAATGTTACTCGATTTCCTGCCTGAAGTTCGCAACAAAGTTGAGGAACAGTGTATGGACCGGGTCATCTGACACCATC
994	basR	AAGCTTTGCTCGAAGAAACTATGATGAAAATTCTGATTGTTGAAGACGATACGCTGTTATTGCAGGGACTGATTCTGGCGGTGTATGGACCGGGTCATCTGACACCATC
995	basR	AAGCTTTGCTCGAAGAAACTATGGTGAAGAGTTGATTCTGACGCCCAAAGAATATGCTCTGCTGTCACGGTTAATGCTCAAAGTGTATGGACCGGGTCATCTGACACCATC
996	basR	AAGCTTTGCTCGAAGAAACTATGGAAATTCTCTACAACGACATCTATAACTGGGACAATGAACCCTCGACCAACACCCTGGTGTATGGACCGGGTCATCTGACACCATC
997	basR	AAGCTTTGCTCGAAGAAACTATGGGAAATTCTCTACAACGACATCTATAACTGGGACAATGAACCCTCGACCAACACCCTGTGTATGGACCGGGTCATCTGACACCATC
998	basR	AAGCTTTGCTCGAAGAAACTATGCATCGGGAAATTCTCTACAACGACATCTATAACTGGGACAATGAACCCTCGACCAACACCTGTATGGACCGGGTCATCTGACACCATC
999	basS	AAGCTTTGCTCGAAGAAACTATGGAAGATGAAGGACCAGGTATTGATGAGAGTAAATGCGGGGAGTTGAGTAAAGCGTTTGTATGTATGGACCGGGTCATCTGACACCATC
1000	basS	AAGCTTTGCTCGAAGAAACTATGTTGAAGATGAAGGACCAGGTATTGATGAGAGTAAATGCGGGGAGTTGAGTAAAGCGTTTGTGTATGGACCGGGTCATCTGACACCATC
1001	basS	AAGCTTTGCTCGAAGAAACTATGGTTGAAGATGAAGGACCAGGTATTGATGAGAGTAAATGCGGGGAGTTGAGTAAAGCGTTTTGTATGGACCGGGTCATCTGACACCATC
1002	basS	AAGCTTTGCTCGAAGAAACTATGGTGCCGGACAGTCATTTTCTTCCGGTAATTATCAACATGTAAAACTGCTGGAAGATGTCATGTATGGACCGGGTCATCTGACACCATC
1003	basS	AAGCTTTGCTCGAAGAAACTATGTCAACATGTAAAACTGCTGGAAGATGTCATTCTCCCCTCGTATGACGAACTCAGTACCATTGTATGGACCGGGTCATCTGACACCATC
1004	bax	AAGCTTTGCTCGAAGAAACTATGGATGATTCTTATGTTACTCACTCTGGTGTTTTCGAGTGAGGTGTTAGCGAAGACGCACACTGTATGGACCGGGTCATCTGACACCATC
1005	bax	AAGCTTTGCTCGAAGAAACTATGTTTGACTCCCATACGACGATATGGGGCGATGATTCTTATGTTACTCACTCTGGTGTTTTCTGTATGGACCGGGTCATCTGACACCATC
1006	bax	AAGCTTTGCTCGAAGAAACTATGATGATTCACAAGCTGAAGGGCTACTCGACCAAAGGGAAGAGTTATAACAACTACCTGTTCTGTATGGACCGGGTCATCTGACACCATC
1007	bax	AAGCTTTGCTCGAAGAAACTATGGACGTTGTACCAATGCGCCAGGTAAAGTGAAAGGGTACTCACAGTTTAGTTCTGTCAAAGTGTATGGACCGGGTCATCTGACACCATC
1008	bax	AAGCTTTGCTCGAAGAAACTATGCACAGTTTAGTTCTGTCAAAGAATCGGTGAGCGCCTATGTCACTAACCTGAATACGCACTGTATGGACCGGGTCATCTGACACCATC
1009	bcp	AAGCTTTGCTCGAAGAAACTATGCCTGATTGACGCTGATGGCAAAATCGAACATGTCTTTGACGATTTCAAAACCAGCAATCTGTATGGACCGGGTCATCTGACACCATC
1010	bcp	AAGCTTTGCTCGAAGAAACTATGAACAAGTTAATTTGACCGACTTCCAGGGACAGCGTGTTCTGGTTTATTTCTACCCGAAAGTGTATGGACCGGGTCATCTGACACCATC
1011	bcp	AAGCTTTGCTCGAAGAAACTATGTGATTGACGCTGATGGCAAAATCGAACATGTCTTTGACGATTTCAAAACCAGCAATCACTGTATGGACCGGGTCATCTGACACCATC
1012	bcp	AAGCTTTGCTCGAAGAAACTATGATCAGCTTCCTGATTGACGCTGATGGCAAAATCGAACATGTCTTTGACGATTTCAAAACCTGTATGGACCGGGTCATCTGACACCATC
1013	bcp	AAGCTTTGCTCGAAGAAACTATGGTGATATCGCACCGAAATTTAGCTTGCCGGATCAAGACGGAGAACAAGTTAATTTGACCTGTATGGACCGGGTCATCTGACACCATC
1014	bcr	AAGCTTTGCTCGAAGAAACTATGAATTAACCACGTCGCGCCGGAAAACTTTGGTTATTACTTTGCGCTAAACATTGTTTTTCTTGTATGGACCGGGTCATCTGACACCATC
1015	bcr	AAGCTTTGCTCGAAGAAACTATGGCGCCGGAAAACTTTGGTTATTACTTTGCGCTAAACATTGTTTTTCTGTTCGTGATGACCTGTATGGACCGGGTCATCTGACACCATC
1016	bcr	AAGCTTTGCTCGAAGAAACTATGTTACTTTGCGCTAAACATTGTTTTTCTGTTCGTGATGACCATCTTTAACAGCCGCTTCGTTGTATGGACCGGGTCATCTGACACCATC
1017	bcr	AAGCTTTGCTCGAAGAAACTATGCGCGCCGGAAAACTTTGGTTATTACTTTGCGCTAAACATTGTTTTTCTGTTCGTGATGACTGTATGGACCGGGTCATCTGACACCATC
1018	bcr	AAGCTTTGCTCGAAGAAACTATGGTCGCGCCGGAAAACTTTGGTTATTACTTTGCGCTAAACATTGTTTTTCTGTTCGTGATGTGTATGGACCGGGTCATCTGACACCATC
1019	bcsA	AAGCTTTGCTCGAAGAAACTATGGAAAAATACCATTTACGCCTCGCTGGGTATCGACTGGCCGAAAGATAAGCTGAATATCTGTGTATGGACCGGGTCATCTGACACCATC
1020	bcsA	AAGCTTTGCTCGAAGAAACTATGGTGAAAAATACCATTTACGCCTCGCTGGGTATCGACTGGCCGAAAGATAAGCTGAATATCTGTATGGACCGGGTCATCTGACACCATC
1021	bcsA	AAGCTTTGCTCGAAGAAACTATGTCGGTGGATATCTTTGTCCCGACTTACAACGAAGATCTCAACGTGGTGAAAAATACCATTGTATGGACCGGGTCATCTGACACCATC
1022	bcsA	AAGCTTTGCTCGAAGAAACTATGCGGTGGATATCTTTGTCCCGACTTACAACGAAGATCTCAACGTGGTGAAAAATACCATTTTGTATGGACCGGGTCATCTGACACCATC
1023	bcsA	AAGCTTTGCTCGAAGAAACTATGGAAAAATACCATTTACGCCTCGCTGGGTATCGACTGGCCGAAAGATAAGCTGAATATCTTGTATGGACCGGGTCATCTGACACCATC
1024	bcsB	AAGCTTTGCTCGAAGAAACTATGCAAAGAACAGTTGGGTAAAAAAACGCTGGCGCAAATGCCCATTAACCCACTGTTTATTATGTATGGACCGGGTCATCTGACACCATC
1025	bcsB	AAGCTTTGCTCGAAGAAACTATGGATCTCTACCTGATGCGCAGTACCGGCATTGATATGGATATTAATTACCGCTACACCATTGTATGGACCGGGTCATCTGACACCATC
1026	bcsB	AAGCTTTGCTCGAAGAAACTATGAATCATGTGGTGATTGGTGACGACTCCACCATCGACTTCTCGAAGTATTACCACTTCATCTGTATGGACCGGGTCATCTGACACCATC
1027	bcsB	AAGCTTTGCTCGAAGAAACTATGGAATCATGTGGTGATTGGTGACGACTCCACCATCGACTTCTCGAAGTATTACCACTTCATTGTATGGACCGGGTCATCTGACACCATC
1028	bcsB	AAGCTTTGCTCGAAGAAACTATGATCATGATCATCGGTGGTATCCCGGACAAACTGAAAGACGATAAGCAGATCGACCTATTGTGTATGGACCGGGTCATCTGACACCATC
1029	bcsC	AAGCTTTGCTCGAAGAAACTATGCCATCGTGAAGATCTGGTGCAACAGTCGTTATATCGGCTGGAACTTATTGATCCGAATATGTATGGACCGGGTCATCTGACACCATC
1030	bcsC	AAGCTTTGCTCGAAGAAACTATGTATTACTATAAGGTCATTAACCAGAACAATCGCCGCGTCACAATCGGCCTGAACAACATGTGTATGGACCGGGTCATCTGACACCATC
1031	bcsC	AAGCTTTGCTCGAAGAAACTATGTATTACTATAAGGTCATTAACCAGAACAATCGCCGCGTCACAATCGGCCTGAACAACATTGTATGGACCGGGTCATCTGACACCATC
1032	bcsC	AAGCTTTGCTCGAAGAAACTATGCATCGTGAAGATCTGGTGCAACAGTCGTTATATCGGCTGGAACTTATTGATCCGAATAACTGTATGGACCGGGTCATCTGACACCATC
1033	bcsC	AAGCTTTGCTCGAAGAAACTATGCGTGAAGATCTGGTGCAACAGTCGTTATATCGGCTGGAACTTATTGATCCGAATAACCCTGTATGGACCGGGTCATCTGACACCATC
1034	bcsE	AAGCTTTGCTCGAAGAAACTATGCATTTTCTCAAACCGTATGGTCTGGTTTGAAGATGATCAAATCAGTGCCGAGCTGGTGTGTATGGACCGGGTCATCTGACACCATC
1035	bcsE	AAGCTTTGCTCGAAGAAACTATGTCTGTCGGATTAACGATCTGGATACCGCGTTGAATCATATTTTCCCATTGCCTACTGGTGTATGGACCGGGTCATCTGACACCATC
1036	bcsE	AAGCTTTGCTCGAAGAAACTATGTCTGTAATGCCGTCAACAACATGATGAATAACCCTCTATTACCTGCCCACGGTAAAGGTGTATGGACCGGGTCATCTGACACCATC
1037	bcsE	AAGCTTTGCTCGAAGAAACTATGACAGCGATCCGGCGAAAATCTTTCAATTAGATGATTCTCAAGGGCCGGAAAAAATAAAATGTATGGACCGGGTCATCTGACACCATC
1038	bcsE	AAGCTTTGCTCGAAGAAACTATGCTATCGGAACACTGGCAACTGTTCAACAATAACGAAGTCCTGTTCAATGAAGCCCGTACTGTATGGACCGGGTCATCTGACACCATC
1039	bcsF	AAGCTTTGCTCGAAGAAACTATGCATCAGCGATATCATTGAAATTATTGTCGTTTGCGCACTGATATTTTTCCCGCTGGGCTATGTATGGACCGGGTCATCTGACACCATC
1040	bcsF	AAGCTTTGCTCGAAGAAACTATGTGACCATCAGCGATATCATTGAAATTATTGTCGTTTGCGCACTGATATTTTTCCCGCTGGTGTATGGACCGGGTCATCTGACACCATC
1041	bcsF	AAGCTTTGCTCGAAGAAACTATGAGCGATATCATTGAAATTATTGTCGTTTGCGCACTGATATTTTTCCCGCTGGGCTATCTTGTATGGACCGGGTCATCTGACACCATC
1042	bcsF	AAGCTTTGCTCGAAGAAACTATGTCAGCGATATCATTGAAATTATTGTCGTTTGCGCACTGATATTTTTCCCGCTGGGCTATTGTATGGACCGGGTCATCTGACACCATC
1043	bcsF	AAGCTTTGCTCGAAGAAACTATGATCAGCGATATCATTGAAATTATTGTCGTTTGCGCACTGATATTTTTCCCGCTGGGCTATGTATGGACCGGGTCATCTGACACCATC
1044	bcsG	AAGCTTTGCTCGAAGAAACTATGGTTTATGACGATACCGCTGTGCTTAACCGCTGGCTGGACGTTACCGAAAAAGATAAAAACTGTATGGACCGGGTCATCTGACACCATC
1045	bcsG	AAGCTTTGCTCGAAGAAACTATGACTTCTATTTTCTGGTTAAGTTCGGCCTGTTGTGGGCGGGATATCTTAACTTCCATCCTGTATGGACCGGGTCATCTGACACCATC
1046	bcsG	AAGCTTTGCTCGAAGAAACTATGAACTGGCAGATGATTGGGGCCATTTTTGTTTTATTAGTGGCCTGGTTATTCCTGTCACAATGTATGGACCGGGTCATCTGACACCATC
1047	bcsG	AAGCTTTGCTCGAAGAAACTATGGATGAACTGGACGCCTTCTTTACTGAACTTGAGAAATCGGGTCGTAAAGTGATGGTGGTCTGTATGGACCGGGTCATCTGACACCATC
1048	bcsG	AAGCTTTGCTCGAAGAAACTATGGATTTTCACCGAAGACAATGTTGACTGGAAAAAACTCACCAGTGGGTTGCCACAAACAGTGTATGGACCGGGTCATCTGACACCATC
1049	bcsZ	AAGCTTTGCTCGAAGAAACTATGTAATATTCTCGACTGGACGCAGAACAATCTCGCTCAGGGTTCTTTAAAAGAACGTTTGCCTGTATGGACCGGGTCATCTGACACCATC
1050	bcsZ	AAGCTTTGCTCGAAGAAACTATGATAATATTCTCGACTGGACGCAGAACAATCTCGCTCAGGGTTCTTTAAAAGAACGTTTGCTGTATGGACCGGGTCATCTGACACCATC
1051	bcsZ	AAGCTTTGCTCGAAGAAACTATGCAGCTTTCGATAATATTCTCGACTGGACGCAGAACAATCTCGCTCAGGGTTCTTTAAAAGTGTATGGACCGGGTCATCTGACACCATC
1052	bcsZ	AAGCTTTGCTCGAAGAAACTATGGCAGCTTTCGATAATATTCTCGACTGGACGCAGAACAATCTCGCTCAGGGTTCTTTAAATGTATGGACCGGGTCATCTGACACCATC
1053	bcsZ	AAGCTTTGCTCGAAGAAACTATGTCGATAATATTCTCGACTGGACGCAGAACAATCTCGCTCAGGGTTCTTTAAAAGAACGTTGTATGGACCGGGTCATCTGACACCATC
1054	bdm	AAGCTTTGCTCGAAGAAACTATGCTGATAACGACATCCTCAGTGATATCTACCAGCAAACGATCAATTATGTGGTCAGTGGCCTGTATGGACCGGGTCATCTGACACCATC
1055	bdm	AAGCTTTGCTCGAAGAAACTATGGATAACGACATCCTCAGTGATATCTACCAGCAAACGATCAATTATGTGGTCAGTGGCCAGTGTATGGACCGGGTCATCTGACACCATC
1056	bdm	AAGCTTTGCTCGAAGAAACTATGTTACTTATTATCAGGCAGAAAATTCAACAGCAGAACCCGCTCTGGTTAATGCCATTGAGCTGTATGGACCGGGTCATCTGACACCATC
1057	bdm	AAGCTTTGCTCGAAGAAACTATGTGTTGTCACTGAAGATGACATTCTCATGGAGCTGACCAAATGGGTTGAAGCTTCTGATAATGTATGGACCGGGTCATCTGACACCATC
1058	bdm	AAGCTTTGCTCGAAGAAACTATGATTCTCATGGAGCTGACCAAATGGGTTGAAGCTTCTGATAACGACATCCTCAGTGATATCTGTATGGACCGGGTCATCTGACACCATC
1059	betA	AAGCTTTGCTCGAAGAAACTATGATTCAGTACCATTTCCTGCCAGTAGCGATTAACTATAACGGCTCGAATGCAGTGAAAGAGTGTATGGACCGGGTCATCTGACACCATC
1060	betA	AAGCTTTGCTCGAAGAAACTATGCGAATATTCAGTACCATTTCCTGCCAGTAGCGATTAACTATAACGGCTCGAATGCAGTGATGTATGGACCGGGTCATCTGACACCATC
1061	betA	AAGCTTTGCTCGAAGAAACTATGAATTTGAACGCCACGACAATTATGATTGGCGAGAAAATAGCGGATATGATTCGTGGACAGTGTATGGACCGGGTCATCTGACACCATC
1062	betA	AAGCTTTGCTCGAAGAAACTATGGATTATCACCGGGAATTTGAACGCCACGACAATTATGATTGGCGAGAAAATAGCGGATATTGTATGGACCGGGTCATCTGACACCATC
1063	betA	AAGCTTTGCTCGAAGAAACTATGAAATCTTCAGGATCATCTGGAGATGTATCTGCAATATGAGTGCAAAGAACCGGTTTCCCTTGTATGGACCGGGTCATCTGACACCATC
1064	betB	AAGCTTTGCTCGAAGAAACTATGCAGAGTTACACCCAGGTGAAGTCCATCCAGGTTGAGATGGCTAAATTCCAGTCCATATTCTGTATGGACCGGGTCATCTGACACCATC
1065	betB	AAGCTTTGCTCGAAGAAACTATGGAGTTACACCCAGGTGAAGTCCATCCAGGTTGAGATGGCTAAATTCCAGTCCATATTCTGTATGGACCGGGTCATCTGACACCATC
1066	betB	AAGCTTTGCTCGAAGAAACTATGGAGTTACACCCAGGTGAAGTCCATCCAGGTTGAGATGGCTAAATTCCAGTCCATATTCTTGTATGGACCGGGTCATCTGACACCATC
1067	betB	AAGCTTTGCTCGAAGAAACTATGAGAGTTACACCCAGGTGAAGTCCATCCAGGTTGAGATGGCTAAATTCCAGTCCATATTCTGTATGGACCGGGTCATCTGACACCATC
1068	betB	AAGCTTTGCTCGAAGAAACTATGGTTACACCCAGGTGAAGTCCATCCAGGTTGAGATGGCTAAATTCCAGTCCATATTCTATGTATGGACCGGGTCATCTGACACCATC
1069	betI	AAGCTTTGCTCGAAGAAACTATGTTTCTACGGGGATCATCAGCCACTATTTCAGGGACAAAAATGGTCTGCTGGAAGCAACTGTATGGACCGGGTCATCTGACACCATC
1070	betI	AAGCTTTGCTCGAAGAAACTATGGTTTCTACGGGGATCATCAGCCACTATTTCAGGGACAAAAATGGTCTGCTGGAAGCAATGTATGGACCGGGTCATCTGACACCATC
1071	betI	AAGCTTTGCTCGAAGAAACTATGTTTCTACGGGGATCATCAGCCACTATTTCAGGGACAAAAATGGTCTGCTGGAAGTGTATGGACCGGGTCATCTGACACCATC
1072	betI	AAGCTTTGCTCGAAGAAACTATGGTTTCTACGGGGATCATCAGCCACTATTTCAGGGACAAAAATGGTCTGCTGGAAGCTGTATGGACCGGGTCATCTGACACCATC
1073	betI	AAGCTTTGCTCGAAGAAACTATGCGTTTCTACGGGGATCATCAGCCACTATTTCAGGGACAAAAATGGTCTGCTGGAAGCAACTGTATGGACCGGGTCATCTGACACCATC
1074	betT	AAGCTTTGCTCGAAGAAACTATGGGGTCATCTGGATTTGTTGGTGCATATGGGCGAAGAGCAAAACTTTGTCTATCAGATTTGTGTATGGACCGGGTCATCTGACACCATC
1075	betT	AAGCTTTGCTCGAAGAAACTATGTTCAGCTTTGTGATCTTCTTCGTGATGGCGGGGTTGTATAAATCTCTGAAGGTAGAAGATTGTATGGACCGGGTCATCTGACACCATC
1076	betT	AAGCTTTGCTCGAAGAAACTATGTCAGCTTTGTGATCTTCTTCGTGATGGCGGGGTTGTATAAATCTCTGAAGGTAGAAGATTTGTATGGACCGGGTCATCTGACACCATC
1077	betT	AAGCTTTGCTCGAAGAAACTATGCGTTCAGCTTTGTGATCTTCTTCGTGATGGCGGGGTTGTATAAATCTCTGAAGGTAGAATGTATGGACCGGGTCATCTGACACCATC
1078	betT	AAGCTTTGCTCGAAGAAACTATGGGTGATCACCGATATTCTTGACCAGTACGAGCGGCACCTTAACTTTATTCATCTCCATCTGTATGGACCGGGTCATCTGACACCATC
1079	bfd	AAGCTTTGCTCGAAGAAACTATGCTCACTCGTTCCAGCAATTAAAAAAATTTATTCCGGTCGGCAATCAGTGCGGTAAATGTGTGTATGGACCGGGTCATCTGACACCATC
1080	bfd	AAGCTTTGCTCGAAGAAACTATGATGTACGTTTGTCTTTGTAATGGTATCAGCGATAAAAAAATTCGTCAGGCTGTGCGCCAGTGTATGGACCGGGTCATCTGACACCATC
1081	bfd	AAGCTTTGCTCGAAGAAACTATGGTACGTTTGTCTTTGTAATGGTATCAGCGATAAAAAAATTCGTCAGGCTGTGCGCCAGTTTGTATGGACCGGGTCATCTGACACCATC
1082	bfd	AAGCTTTGCTCGAAGAAACTATGTCACTCGTTCCAGCAATTAAAAAAATTTATTCCGGTCGGCAATCAGTGCGGTAAATGTGTTGTATGGACCGGGTCATCTGACACCATC
1083	bfd	AAGCTTTGCTCGAAGAAACTATGACGTTTGTCTTTGTAATGGTATCAGCGATAAAAAAATTCGTCAGGCTGTGCGCCAGTTTTTGTATGGACCGGGTCATCTGACACCATC
1084	bfr	AAGCTTTGCTCGAAGAAACTATGTCTCAAACGTCTCAATGATGTGGAGTATCATGAATCCATTGATGAGATGAAACACGCCGATGTATGGACCGGGTCATCTGACACCATC
1085	bfr	AAGCTTTGCTCGAAGAAACTATGGCAATTGGTTATGCCGATAGCGTTCATGATTACGTCAGCCGCGATATGATGATAGAAATTTGTATGGACCGGGTCATCTGACACCATC
1086	bfr	AAGCTTTGCTCGAAGAAACTATGGAAACGGAACTTGATCTGATTCAGAAGATGGGCCTGCAAAATTATCTGCAAGCACAGATCTGTATGGACCGGGTCATCTGACACCATC
1087	bfr	AAGCTTTGCTCGAAGAAACTATGTATGATGATAGAAATTTTGCGTGATGAAGAAGGCCATATCGACTGGCTGGAAACGGAACTTGTATGGACCGGGTCATCTGACACCATC
1088	bfr	AAGCTTTGCTCGAAGAAACTATGGTCTTCCAAACTTACAGGACCTGGGCAAACTGAACATTGGTGAAGATGTTGAGGAAATGTGTATGGACCGGGTCATCTGACACCATC
1089	bglA	AAGCTTTGCTCGAAGAAACTATGGTACTGGCGATATGTCGCGTTCACGTAAGAAGAGCTTTAACTGGTACAAAGAGGTGATTGTGTATGGACCGGGTCATCTGACACCATC
1090	bglA	AAGCTTTGCTCGAAGAAACTATGAGCCGTTGATTTTTATGGTCACTATAAGGAAGACATCAAGCTATTTGCCGAAATGGGCTTTGTATGGACCGGGTCATCTGACACCATC
1091	bglA	AAGCTTTGCTCGAAGAAACTATGGCGAAATCACCAAAGAAGTCTTGCCAGGAAAATACTATCCAAACCATGAAGCCGTTGATTTGTATGGACCGGGTCATCTGACACCATC
1092	bglA	AAGCTTTGCTCGAAGAAACTATGAAGACATCAAGCTATTTGCCGAAATGGGCTTCAAATGTTTTCGTACATCCATTGCCTGTGTATGGACCGGGTCATCTGACACCATC
1093	bglA	AAGCTTTGCTCGAAGAAACTATGCTATGCACTTTGCGAACTGTATGAGCGTTATCAGAGGCCGCTGTTTATTGTCGAAAACTGTATGGACCGGGTCATCTGACACCATC
1094	bglB	AAGCTTTGCTCGAAGAAACTATGATAAAGTGGCGTTATGGCTGACGTTTAATGAAATCAACATGTCGTTACACGCGCCATTCTGTATGGACCGGGTCATCTGACACCATC
1095	bglB	AAGCTTTGCTCGAAGAAACTATGTCCGCGACCACAATATCACCATTGAGATGACTGAAAGTGACGCAGAAGATTTAAAACATTGTATGGACCGGGTCATCTGACACCATC
1096	bglB	AAGCTTTGCTCGAAGAAACTATGCCGGTTGGATTACGGGTTCTGTTAAATACGCTTTGGGATCGTTATCAAAAACCGTTATTTTGTATGGACCGGGTCATCTGACACCATC
1097	bglB	AAGCTTTGCTCGAAGAAACTATGCAAAGATGTCGCCATCGATTTTTATCACCGTTACCCGGAAGATATCGCGTTATTTGCCTGTATGGACCGGGTCATCTGACACCATC
1098	bglB	AAGCTTTGCTCGAAGAAACTATGTAAACGATCACCTGGTACAGGTAAATGAAGCGATTGCCGATGGTGTGGATATTATGGGTGTATGGACCGGGTCATCTGACACCATC
1099	bglF	AAGCTTTGCTCGAAGAAACTATGAATTTTATTCAGCGCCAGTGATGCCTTGTTTTGGTTCTTCCCGATAATCCTGGGATACTGTATGGACCGGGTCATCTGACACCATC
1100	bglF	AAGCTTTGCTCGAAGAAACTATGGTTTGCCAAGTATTTTCACCTTCATGCAAACCATCCCGTCAACGGGAATTGATTTCACTGTATGGACCGGGTCATCTGACACCATC
1101	bglF	AAGCTTTGCTCGAAGAAACTATGCTTGACGAAAAAGCGCAACAGGCACCGGAAAATGATGATAAAGGTAATCTGCTAAACCTGTATGGACCGGGTCATCTGACACCATC
1102	bglF	AAGCTTTGCTCGAAGAAACTATGGTGGAGATCCTGATTCATGTCGGTATCGACACCGTAAAACTGGACGGCAAATTCTTTTCTGTATGGACCGGGTCATCTGACACCATC
1103	bglF	AAGCTTTGCTCGAAGAAACTATGATTAATCAGTAATAGCGATGATTTTACGGACGTATTACCCCACGGCACGGCGCAGATAAGTGTATGGACCGGGTCATCTGACACCATC
1104	bglG	AAGCTTTGCTCGAAGAAACTATGTTCACCCGCAGAGATTATGTTTTTAGCCATAAATATAGAGCGCGTGCGCAAAGAACACTGTATGGACCGGGTCATCTGACACCATC
1105	bglG	AAGCTTTGCTCGAAGAAACTATGATATCTCGCTAACTGACCATTGCCAGTTTGCGATTAAACGCTTTCAGCAAAACGTGTTGTGTATGGACCGGGTCATCTGACACCATC
1106	bglG	AAGCTTTGCTCGAAGAAACTATGGAACTGAACGGGCGATTAAGCGAACTCTTAAGTCATATTCCTCTTGAGGTGATGGCAATGTATGGACCGGGTCATCTGACACCATC
1107	bglG	AAGCTTTGCTCGAAGAAACTATGCATGGCAATGTGCGGAACGGATCGCCATTTTTATTGGTTTGCAGTATCAACGTAAAATTGTATGGACCGGGTCATCTGACACCATC
1108	bglG	AAGCTTTGCTCGAAGAAACTATGCAACAATAATGTTGTGGTGGTTATTGATGATCAACAGCGGGAAAAAGTCGTCATGGGGTGTATGGACCGGGTCATCTGACACCATC
1109	bglH	AAGCTTTGCTCGAAGAAACTATGTGGTTTGATTTGCAGTTAAAACAACGTGTCTACAACGAAAACGGCAAACGGGTTGATGTGTATGGACCGGGTCATCTGACACCATC
1110	bglH	AAGCTTTGCTCGAAGAAACTATGAAAAAGTATACGCCAGCGACGGTGAATCGTAGCGTAAGTACGAATGATCAAGGGTATGTGTATGGACCGGGTCATCTGACACCATC
1111	bglH	AAGCTTTGCTCGAAGAAACTATGGCCTATATTGGCGATCATTTCATTGTAGCTAACGCGATTGTTTACTCCTTCGGTAACGATGTATGGACCGGGTCATCTGACACCATC
1112	bglH	AAGCTTTGCTCGAAGAAACTATGAATACCAGTATGTTGACCTCGCGTCCGGAAATTCGTTTCTACGCCACGTATATCAAAGTGTATGGACCGGGTCATCTGACACCATC
1113	bglH	AAGCTTTGCTCGAAGAAACTATGCAGACAGGTGTTGAACTGGGCTATTTCACCCAGCAAAACAAAGATGCGAATAGTAATAAATGTATGGACCGGGTCATCTGACACCATC
1114	bglJ	AAGCTTTGCTCGAAGAAACTATGGCCGAGCAGCTTAAACGCAATATCAAAACGATCCGTGCACATAAATTTAATGTGATGTCGTGTATGGACCGGGTCATCTGACACCATC
1115	bglJ	AAGCTTTGCTCGAAGAAACTATGAACGCTGGAGATTTTTCATCAGGAACTCTTTTTGTCATTAAATGGTGTACGTCAGGCGACTGTATGGACCGGGTCATCTGACACCATC
1116	bglJ	AAGCTTTGCTCGAAGAAACTATGCAACGCTGGAGATTTTTCATCAGGAACTCTTTTTGTCATTAAATGGTGTACGTCAGGCGATGTATGGACCGGGTCATCTGACACCATC
1117	bglJ	AAGCTTTGCTCGAAGAAACTATGTCAACGCTGGAGATTTTTCATCAGGAACTCTTTTTGTCATTAAATGGTGTACGTCAGGCGTGTATGGACCGGGTCATCTGACACCATC
1118	bglJ	AAGCTTTGCTCGAAGAAACTATGCCGCAGATATTCTGTTATGTATGCGGCATTGCGAAACAAGTAATGTGTTGCATCCCTATTTGTATGGACCGGGTCATCTGACACCATC
1119	bglX	AAGCTTTGCTCGAAGAAACTATGCCGCCATGTACTGAACGTTAAATATGATATGGGGTTGTTTAACGACCCATACAGCCATTTTGTATGGACCGGGTCATCTGACACCATC
1120	bglX	AAGCTTTGCTCGAAGAAACTATGGTCAGCTTCCCGATCGATATTGAGGCGCTGAAGTTCTGGAATCAACAGATGAAATATGACTGTATGGACCGGGTCATCTGACACCATC
1121	bglX	AAGCTTTGCTCGAAGAAACTATGGTATAATGCCGACAAGCCGAACAAATACACTTCGCGTTATTTTGATGAAGCTAACGGGGTGTATGGACCGGGTCATCTGACACCATC
1122	bglX	AAGCTTTGCTCGAAGAAACTATGGGTAAAGAGTACAACACCGTCGATATGAGTCCGCAGCGCCTGTTTAATGATTATATGCCTGTATGGACCGGGTCATCTGACACCATC
1123	bglX	AAGCTTTGCTCGAAGAAACTATGCCATGCAGGATCAGGTGATGGAATTAAGCCGCCTGAAAATTCCTCTTTTCTTTGCTTACTGTATGGACCGGGTCATCTGACACCATC
1124	bioA	AAGCTTTGCTCGAAGAAACTATGCATGTACCATCCGGAATGGTTAAAACGAATCCGCAAAATATGCGATCGCGAAGGTATCTGTATGGACCGGGTCATCTGACACCATC
1125	bioA	AAGCTTTGCTCGAAGAAACTATGGGAATGGTTAAAACGAATCCGCAAAATATGCGATCGCGAAGGTATCTTGCTGATTGCTGTATGGACCGGGTCATCTGACACCATC
1126	bioA	AAGCTTTGCTCGAAGAAACTATGGAATGGTTAAAACGAATCCGCAAAATATGCGATCGCGAAGGTATCTTGCTGATTGCCTGTATGGACCGGGTCATCTGACACCATC
1127	bioA	AAGCTTTGCTCGAAGAAACTATGATCCGGAATGGTTAAAACGAATCCGCAAAATATGCGATCGCGAAGGTATCTTGCTGATTGTGTATGGACCGGGTCATCTGACACCATC
1128	bioA	AAGCTTTGCTCGAAGAAACTATGCATCCGGAATGGTTAAAACGAATCCGCAAAATATGCGATCGCGAAGGTATCTTGCTGATTTGTATGGACCGGGTCATCTGACACCATC
1129	bioB	AAGCTTTGCTCGAAGAAACTATGACATTGTCGCAAGTCACAGAATTATTTGAAAAACCGTTGCTGGATCTGCTGTTTGAAGCTGTATGGACCGGGTCATCTGACACCATC
1130	bioB	AAGCTTTGCTCGAAGAAACTATGCTGGACATTGTCGCAAGTCACAGAATTATTTGAAAAACCGTTGCTGGATCTGCTGTTTGTGTATGGACCGGGTCATCTGACACCATC
1131	bioB	AAGCTTTGCTCGAAGAAACTATGCATTGTCGCAAGTCACAGAATTATTTGAAAAACCGTTGCTGGATCTGCTGTTTGAAGCGTGTATGGACCGGGTCATCTGACACCATC
1132	bioB	AAGCTTTGCTCGAAGAAACTATGTGGACATTGTCGCAAGTCACAGAATTATTTGAAAAACCGTTGCTGGATCTGCTGTTTGATGTATGGACCGGGTCATCTGACACCATC
1133	bioB	AAGCTTTGCTCGAAGAAACTATGGGACATTGTCGCAAGTCACAGAATTATTTGAAAAACCGTTGCTGGATCTGCTGTTTGAATGTATGGACCGGGTCATCTGACACCATC
1134	bioC	AAGCTTTGCTCGAAGAAACTATGTTTTTACCGCCAGATGAAATCGAACAGTCGCTGAACGGCGTGCATTATCAACATCATATTGTATGGACCGGGTCATCTGACACCATC
1135	bioC	AAGCTTTGCTCGAAGAAACTATGTTTTACCGCCAGATGAAATCGAACAGTCGCTGAACGGCGTGCATTATCAACATCATATTTGTATGGACCGGGTCATCTGACACCATC
1136	bioC	AAGCTTTGCTCGAAGAAACTATGTTTACCGCCAGATGAAATCGAACAGTCGCTGAACGGCGTGCATTATCAACATCATATTCTGTATGGACCGGGTCATCTGACACCATC
1137	bioC	AAGCTTTGCTCGAAGAAACTATGCTTTTTACCGCCAGATGAAATCGAACAGTCGCTGAACGGCGTGCATTATCAACATCATATGTATGGACCGGGTCATCTGACACCATC
1138	bioC	AAGCTTTGCTCGAAGAAACTATGCAGATGAAATCGAACAGTCGCTGAACGGCGTGCATTATCAACATCATATTCAGCCCATCTGTATGGACCGGGTCATCTGACACCATC
1139	bioD	AAGCTTTGCTCGAAGAAACTATGGTTGGTGTGAAACTCGGCTGTATTAATCACGCGATGTTGACTGCACAGGTAATACAACTGTATGGACCGGGTCATCTGACACCATC
1140	bioD	AAGCTTTGCTCGAAGAAACTATGTAGTTGGTGTGAAACTCGGCTGTATTAATCACGCGATGTTGACTGCACAGGTAATACATGTATGGACCGGGTCATCTGACACCATC
1141	bioD	AAGCTTTGCTCGAAGAAACTATGGTTGGTGTGAAACTCGGCTGTATTAATCACGCGATGTTGACTGCACAGGTAATACAACACTGTATGGACCGGGTCATCTGACACCATC
1142	bioD	AAGCTTTGCTCGAAGAAACTATGCTTTCTGACACTTTCACTTTTGCAGATTGGGTAACACAGGAACAACTGCCGGTGATACTGTGTATGGACCGGGTCATCTGACACCATC
1143	bioD	AAGCTTTGCTCGAAGAAACTATGTAACACAGGAACAACTGCCGGTGATACTGGTAGTTGGTGTGAAACTCGGCTGTATTAATCTGTATGGACCGGGTCATCTGACACCATC
1144	bioF	AAGCTTTGCTCGAAGAAACTATGTGGTGGCGGATGATCGCCAGTATCTGAACTTTTCCAGTAACGATTATTTAGGTTTAAGCCTGTATGGACCGGGTCATCTGACACCATC
1145	bioF	AAGCTTTGCTCGAAGAAACTATGGGCTGGTGGCGGATGATCGCCAGTATCTGAACTTTTCCAGTAACGATTATTTAGGTTTAATGTATGGACCGGGTCATCTGACACCATC
1146	bioF	AAGCTTTGCTCGAAGAAACTATGTTTCCAGTAACGATTATTTAGGTTTAAGCCATCATCCGCAAATTATCCGTGCCTGGCAGTGTATGGACCGGGTCATCTGACACCATC
1147	bioF	AAGCTTTGCTCGAAGAAACTATGTTTTCCAGTAACGATTATTTAGGTTTAAGCCATCATCCGCAAATTATCCGTGCCTGGCATGTATGGACCGGGTCATCTGACACCATC
1148	bioF	AAGCTTTGCTCGAAGAAACTATGGCTGGTGGCGGATGATCGCCAGTATCTGAACTTTTCCAGTAACGATTATTTAGGTTTAAGTGTATGGACCGGGTCATCTGACACCATC
1149	bioH	AAGCTTTGCTCGAAGAAACTATGAAGTGGTGCCGATGCTGGATAAACTTTGGCCTCACAGCGAATCATATATCTTCGTGTATGGACCGGGTCATCTGACACCATC
1150	bioH	AAGCTTTGCTCGAAGAAACTATGGTGCCGATGCTGGATAAACTTTGGCCTCACAGCGAATCATATATCTTCGCCAAAGTGTATGGACCGGGTCATCTGACACCATC
1151	bioH	AAGCTTTGCTCGAAGAAACTATGATGAATAACATCTGGTGGCAGACCAAAGGTCAGGGGAATGTTCATCTTGTGCTGTGTATGGACCGGGTCATCTGACACCATC
1152	bioH	AAGCTTTGCTCGAAGAAACTATGCAAAGTGGTGCCGATGCTGGATAAACTTTGGCCTCACAGCGAATCATATATCTTCGCTGTATGGACCGGGTCATCTGACACCATC
1153	bioH	AAGCTTTGCTCGAAGAAACTATGCGCAAAGTGGTGCCGATGCTGGATAAACTTTGGCCTCACAGCGAATCATATATCTTCTGTATGGACCGGGTCATCTGACACCATC
1154	bipA	AAGCTTTGCTCGAAGAAACTATGGGATTACCATCCTCGCGAAAAACACCGCTATCAAATGGAATGATTACCGTATCAACATCGTGTATGGACCGGGTCATCTGACACCATC
1155	bipA	AAGCTTTGCTCGAAGAAACTATGGTAACCAAAAAAGCGTTTGCTTACGGCCTGAAGCCGATTGTTGTTATCAACAAAGTTGACTGTATGGACCGGGTCATCTGACACCATC
1156	bipA	AAGCTTTGCTCGAAGAAACTATGTAAGCTGTTCCTCGGTCACGGTGCAGAAGTTTACGAAGGTCAGATTATCGGTATTCATAGTGTATGGACCGGGTCATCTGACACCATC
1157	bipA	AAGCTTTGCTCGAAGAAACTATGTTTCTATGTTCTTCTGCGTTAACACCTCGCCGTTCTGCGGTAAAGAAGGTAAGTTCGTAATGTATGGACCGGGTCATCTGACACCATC
1158	bipA	AAGCTTTGCTCGAAGAAACTATGCATGACTCTGGAACAAGCTCTGGAGTTCATCGATGATGACGAACTGGTAGAAGTGACTCTGTATGGACCGGGTCATCTGACACCATC
1159	birA	AAGCTTTGCTCGAAGAAACTATGGGAAGTATTACGCAAGCTGGGTGCAGATAAAGTTCGTGTTAAATGGCCTAATGACCTCTATGTATGGACCGGGTCATCTGACACCATC
1160	birA	AAGCTTTGCTCGAAGAAACTATGGATGGAATAATAAAACCCTGGATGGGCGGTGAAATATCCCTGCGTAGTGCAGAAAAATAATGTATGGACCGGGTCATCTGACACCATC
1161	birA	AAGCTTTGCTCGAAGAAACTATGTAATACGTGAATTACGTGCTGCGTTGGAACTCTTCGAACAAGAAGGATTGGCACCTTATCTGTATGGACCGGGTCATCTGACACCATC
1162	birA	AAGCTTTGCTCGAAGAAACTATGGAGCCTATCCAGTTACTTAATGCTAAACAGATATTGGGTCAGCTGGATGGCGGTAGTGTATGTATGGACCGGGTCATCTGACACCATC
1163	birA	AAGCTTTGCTCGAAGAAACTATGATAGACAAACAGGGGGCTTTATTACTTGAGCAGGATGGAATAATAAAACCCTGGATGGGCTGTATGGACCGGGTCATCTGACACCATC
1164	bisC	AAGCTTTGCTCGAAGAAACTATGGATCTTATTCACCAACAACATAAACGCATTCGTGAGGCTTATGGTCCGGCATCGATTTTTTGTATGGACCGGGTCATCTGACACCATC
1165	bisC	AAGCTTTGCTCGAAGAAACTATGATCTTATTCACCAACAACATAAACGCATTCGTGAGGCTTATGGTCCGGCATCGATTTTTGTGTATGGACCGGGTCATCTGACACCATC
1166	bisC	AAGCTTTGCTCGAAGAAACTATGTATGCACGTTTTACGGAAGGAAAAAGTGAGCTGCAATGGCTGGAAACGTTTTATAACGTTTGTATGGACCGGGTCATCTGACACCATC
1167	bisC	AAGCTTTGCTCGAAGAAACTATGTTATGCACGTTTTACGGAAGGAAAAAGTGAGCTGCAATGGCTGGAAACGTTTTATAACGTTGTATGGACCGGGTCATCTGACACCATC
1168	bisC	AAGCTTTGCTCGAAGAAACTATGTACCTCTTTTGAGCGTAATGATCTCACCATGACCGGTGATTACAGTAATCAGCATCTGGTTGTATGGACCGGGTCATCTGACACCATC
1169	blc	AAGCTTTGCTCGAAGAAACTATGTGTCATTCTTTGGTCCTTTCTATGGCGGTTATAACGTTATTGCACTCGATCGGGAATACCTGTATGGACCGGGTCATCTGACACCATC
1170	blc	AAGCTTTGCTCGAAGAAACTATGCGTGACCGTAGTAAATAATTTCGACGCCAAACGTTATCTCGGTACCTGGTATGAGATTGCTGTATGGACCGGGTCATCTGACACCATC
1171	blc	AAGCTTTGCTCGAAGAAACTATGGCGTGACCGTAGTAAATAATTTCGACGCCAAACGTTATCTCGGTACCTGGTATGAGATTGTGTATGGACCGGGTCATCTGACACCATC
1172	blc	AAGCTTTGCTCGAAGAAACTATGAGTAAATAATTTCGACGCCAAACGTTATCTCGGTACCTGGTATGAGATTGCCCGTTTTGATGTATGGACCGGGTCATCTGACACCATC
1173	blc	AAGCTTTGCTCGAAGAAACTATGAAGTGTCATTCTTTGGTCCTTTCTATGGCGGTTATAACGTTATTGCACTCGATCGGGAATTGTATGGACCGGGTCATCTGACACCATC
1174	blr	AAGCTTTGCTCGAAGAAACTATGTATTGAATTAACAGGTTGGATCGTTCTTGTCGTTTCAGTCATTCTTCTTGGCGTGGCGAGTGTATGGACCGGGTCATCTGACACCATC
1175	blr	AAGCTTTGCTCGAAGAAACTATGTCGTCTTATTGAATTAACAGGTTGGATCGTTCTTGTCGTTTCAGTCATTCTTCTTGGCGTTGTATGGACCGGGTCATCTGACACCATC
1176	blr	AAGCTTTGCTCGAAGAAACTATGTATTGAATTAACAGGTTGGATCGTTCTTGTCGTTTCAGTCATTCTTCTTGGCGTGGCGTGTATGGACCGGGTCATCTGACACCATC
1177	blr	AAGCTTTGCTCGAAGAAACTATGTATTGAATTAACAGGTTGGATCGTTCTTGTCGTTTCAGTCATTCTTCTTGGCGTGGCGATGTATGGACCGGGTCATCTGACACCATC
1178	blr	AAGCTTTGCTCGAAGAAACTATGGAGTCACATTGACAACTATCAGCCACCTGAACAGAGTGCTTCGGTACAACACAAGTAATGTATGGACCGGGTCATCTGACACCATC
1179	bolA	AAGCTTTGCTCGAAGAAACTATGCATTTTAAAGTTGTGCTGGTCAGCGATCGTTTTACGGGTGAACGTTTTCTGAATCGTCATTGTATGGACCGGGTCATCTGACACCATC
1180	bolA	AAGCTTTGCTCGAAGAAACTATGGGTCAGCGATCGTTTTACGGGTGAACGTTTTCTGAATCGTCATCGAATGATTTACAGTACTGTATGGACCGGGTCATCTGACACCATC
1181	bolA	AAGCTTTGCTCGAAGAAACTATGGATAGAAGAAAAATTAAGGGCGGCGTTCCAACCCGTATTCCTCGAAGTAGTGGATGAAAGTGTATGGACCGGGTCATCTGACACCATC
1182	bolA	AAGCTTTGCTCGAAGAAACTATGATCGTCATCGAATGATTTACAGTACTTTAGCGGAGGAACTCTCTACTACCGTTCATGCGCTGTATGGACCGGGTCATCTGACACCATC
1183	bolA	AAGCTTTGCTCGAAGAAACTATGTACGGGTGAACGTTTTCTGAATCGTCATCGAATGATTTACAGTACTTTAGCGGAGGAACTTGTATGGACCGGGTCATCTGACACCATC
1184	brnQ	AAGCTTTGCTCGAAGAAACTATGGCTGTTTATCTACAGCCTGGTCTATTTCGCTATCGTTATTCTGGTTTCGCTCTATCCGGTGTATGGACCGGGTCATCTGACACCATC
1185	brnQ	AAGCTTTGCTCGAAGAAACTATGCCGCTGTTTATCTACAGCCTGGTCTATTTCGCTATCGTTATTCTGGTTTCGCTCTATCCTGTATGGACCGGGTCATCTGACACCATC
1186	brnQ	AAGCTTTGCTCGAAGAAACTATGTTTATCTACAGCCTGGTCTATTTCGCTATCGTTATTCTGGTTTCGCTCTATCCGGGCAAGTGTATGGACCGGGTCATCTGACACCATC
1187	brnQ	AAGCTTTGCTCGAAGAAACTATGATTTATCCGCCGTGTATCGCACTGGTTGTATTAAGTTTTACACGCTCATGGTGGCATAATTGTATGGACCGGGTCATCTGACACCATC
1188	brnQ	AAGCTTTGCTCGAAGAAACTATGTTTATCCGCCGTGTATCGCACTGGTTGTATTAAGTTTTACACGCTCATGGTGGCATAATTTGTATGGACCGGGTCATCTGACACCATC
1189	bssR	AAGCTTTGCTCGAAGAAACTATGCTGAGGAAGGCAAAAGGATACATGTCCGTCAGCGAAAGCAATCATCTACGAGATAACTTTTGTATGGACCGGGTCATCTGACACCATC
1190	bssR	AAGCTTTGCTCGAAGAAACTATGTTTTTTAAACTGAATCGCGAACTGCACGATAAATCGCTGCGGTTGAATCTTCATCTGGATTGTATGGACCGGGTCATCTGACACCATC
1191	bssR	AAGCTTTGCTCGAAGAAACTATGGTTGAATCTTCATCTGGATCAGGAAGAGTGGAGTGCTCTTCATCATGCTGAAGAAGCATTTGTATGGACCGGGTCATCTGACACCATC
1192	bssR	AAGCTTTGCTCGAAGAAACTATGCCGTCAGCGAAAGCAATCATCTACGAGATAACTTTTTTAAACTGAATCGCGAACTGCACGTGTATGGACCGGGTCATCTGACACCATC
1193	bssR	AAGCTTTGCTCGAAGAAACTATGTTTTTAAACTGAATCGCGAACTGCACGATAAATCGCTGCGGTTGAATCTTCATCTGGATCTGTATGGACCGGGTCATCTGACACCATC
1194	bssS	AAGCTTTGCTCGAAGAAACTATGATATTAGAAGCAGGAATCGCCAAAATTGAATCCGGTGATTTCCAGGTAAACGAGTATCGGTGTATGGACCGGGTCATCTGACACCATC
1195	bssS	AAGCTTTGCTCGAAGAAACTATGCTGAAGTTGGTCAGACGCTCTGGTTAACCACTGATGTTGCCAGACAATTTATTTCGATATTGTATGGACCGGGTCATCTGACACCATC
1196	bssS	AAGCTTTGCTCGAAGAAACTATGTGAAGTTGGTCAGACGCTCTGGTTAACCACTGATGTTGCCAGACAATTTATTTCGATATTTGTATGGACCGGGTCATCTGACACCATC
1197	bssS	AAGCTTTGCTCGAAGAAACTATGGGTCAGACGCTCTGGTTAACCACTGATGTTGCCAGACAATTTATTTCGATATTAGAAGCATGTATGGACCGGGTCATCTGACACCATC
1198	bssS	AAGCTTTGCTCGAAGAAACTATGTGGTCAGACGCTCTGGTTAACCACTGATGTTGCCAGACAATTTATTTCGATATTAGAAGCTGTATGGACCGGGTCATCTGACACCATC
1199	btuB	AAGCTTTGCTCGAAGAAACTATGAAAGATTATGAGACAGTCTATGGCTACCAAACTGCAGGACGGGAATACACCTTGTCTGTGTATGGACCGGGTCATCTGACACCATC
1200	btuB	AAGCTTTGCTCGAAGAAACTATGCATCTTATAAGGCACCAAATCTGGGGCAACTGTATGGCTTCTACGGAAATCCGAATCTGTGTATGGACCGGGTCATCTGACACCATC
1201	btuB	AAGCTTTGCTCGAAGAAACTATGATTATGATGATCACACCCTGAAATATTACAACGAAGGGAAAGCGCGGATTAAGGGCGTCTGTATGGACCGGGTCATCTGACACCATC
1202	btuB	AAGCTTTGCTCGAAGAAACTATGGTTTTTTAAGTAAAACGCTTTATGGCGCGCTGGAGCATAACTTTACTGATGCCTGGAGTGTATGGACCGGGTCATCTGACACCATC
1203	btuB	AAGCTTTGCTCGAAGAAACTATGGACCGCCAATTTTGATACCGGACCACTGACGCATACTGTGAGTTATGATTATGTCGATTGTATGGACCGGGTCATCTGACACCATC
1204	btuC	AAGCTTTGCTCGAAGAAACTATGTAGGGATTATCTGTAGCGCACTAATGACGTGGGCTATCTACTTTTCCACCTCAGTTGATTTGTATGGACCGGGTCATCTGACACCATC
1205	btuC	AAGCTTTGCTCGAAGAAACTATGGACAAAATATTCGCTGGTTATTATGCCTGTCAGTTTTGATGCTGCTGGCGCTTCTCTTAATGTATGGACCGGGTCATCTGACACCATC
1206	btuC	AAGCTTTGCTCGAAGAAACTATGCATTAGGGATTATCTGTAGCGCACTAATGACGTGGGCTATCTACTTTTCCACCTCAGTTGTGTATGGACCGGGTCATCTGACACCATC
1207	btuC	AAGCTTTGCTCGAAGAAACTATGACAAAATATTCGCTGGTTATTATGCCTGTCAGTTTTGATGCTGCTGGCGCTTCTCTTAAGTGTATGGACCGGGTCATCTGACACCATC
1208	btuC	AAGCTTTGCTCGAAGAAACTATGGGATTATCTGTAGCGCACTAATGACGTGGGCTATCTACTTTTCCACCTCAGTTGATTTGCTGTATGGACCGGGTCATCTGACACCATC
1209	btuD	AAGCTTTGCTCGAAGAAACTATGTCTTGATGAGCCGATGAACAGTCTTGATGTTGCGCAACAAAGTGCGTTAGACAAAATTCTGTATGGACCGGGTCATCTGACACCATC
1210	btuD	AAGCTTTGCTCGAAGAAACTATGCTTGATGAGCCGATGAACAGTCTTGATGTTGCGCAACAAAGTGCGTTAGACAAAATTCTGTATGGACCGGGTCATCTGACACCATC
1211	btuD	AAGCTTTGCTCGAAGAAACTATGCTTGATGAGCCGATGAACAGTCTTGATGTTGCGCAACAAAGTGCGTTAGACAAAATTCTTGTATGGACCGGGTCATCTGACACCATC
1212	btuD	AAGCTTTGCTCGAAGAAACTATGCTTCTTGATGAGCCGATGAACAGTCTTGATGTTGCGCAACAAAGTGCGTTAGACAAAATTGTATGGACCGGGTCATCTGACACCATC
1213	btuD	AAGCTTTGCTCGAAGAAACTATGGATGAGCCGATGAACAGTCTTGATGTTGCGCAACAAAGTGCGTTAGACAAAATTCTGAGTGTATGGACCGGGTCATCTGACACCATC
1214	btuE	AAGCTTTGCTCGAAGAAACTATGATTTTATGGAATTTTGAAAAATTCCTGGTTGGCAGGGACGGAAAAGTCATCCAGCGTTTTTGTATGGACCGGGTCATCTGACACCATC
1215	btuE	AAGCTTTGCTCGAAGAAACTATGCCGATGTTCAGTAAGATTGAAGTTAATGGCGAAGGACGCCATCCGCTGTATCAAAAATTGTGTATGGACCGGGTCATCTGACACCATC
1216	btuE	AAGCTTTGCTCGAAGAAACTATGTTCAGTAAGATTGAAGTTAATGGCGAAGGACGCCATCCGCTGTATCAAAAATTGATTGCCTGTATGGACCGGGTCATCTGACACCATC
1217	btuE	AAGCTTTGCTCGAAGAAACTATGGCTGTACCCGGATGATATTTTATGGAATTTTGAAAAATTCCTGGTTGGCAGGGACGGAAATGTATGGACCGGGTCATCTGACACCATC
1218	btuE	AAGCTTTGCTCGAAGAAACTATGCCGATGTTCAGTAAGATTGAAGTTAATGGCGAAGGACGCCATCCGCTGTATCAAAAATTTGTATGGACCGGGTCATCTGACACCATC
1219	btuF	AAGCTTTGCTCGAAGAAACTATGATTAATCCGCCATTTACCAGTGGAAAAGAGTCGATTCAGAACCAGGTACTCGAAGTTTGTTGTATGGACCGGGTCATCTGACACCATC
1220	btuF	AAGCTTTGCTCGAAGAAACTATGTGTTTTTCTGCAATTCGGCATTAATCCGCCATTTACCAGTGGAAAAGAGTCGATTCAGAATGTATGGACCGGGTCATCTGACACCATC
1221	btuF	AAGCTTTGCTCGAAGAAACTATGCGCGCAATTGAAAGCGCAATATGCTGATAAACCTAAAAAACGTGTTTTTCTGCAATTCGGTGTATGGACCGGGTCATCTGACACCATC
1222	btuF	AAGCTTTGCTCGAAGAAACTATGGCGCAATTGAAAGCGCAATATGCTGATAAACCTAAAAAACGTGTTTTTCTGCAATTCGGCTGTATGGACCGGGTCATCTGACACCATC
1223	btuF	AAGCTTTGCTCGAAGAAACTATGGTGGAAAAGAGTCGATTCAGAACCAGGTACTCGAAGTTTGTGGCGGAGAAAACATCTTTATGTATGGACCGGGTCATCTGACACCATC
1224	btuR	AAGCTTTGCTCGAAGAAACTATGGTTTTGCTTGATGAACTGACGTATATGGTGGCGTATGACTATTTGCCACTGGAAGAAGTGTGTATGGACCGGGTCATCTGACACCATC
1225	btuR	AAGCTTTGCTCGAAGAAACTATGCACTGGATATGGTTTTGCTTGATGAACTGACGTATATGGTGGCGTATGACTATTTGCCACTGTATGGACCGGGTCATCTGACACCATC
1226	btuR	AAGCTTTGCTCGAAGAAACTATGCTGGATATGGTTTTGCTTGATGAACTGACGTATATGGTGGCGTATGACTATTTGCCACTGTGTATGGACCGGGTCATCTGACACCATC
1227	btuR	AAGCTTTGCTCGAAGAAACTATGCTTGCTGATTCCTCACTGGATATGGTTTTGCTTGATGAACTGACGTATATGGTGGCGTATTGTATGGACCGGGTCATCTGACACCATC
1228	btuR	AAGCTTTGCTCGAAGAAACTATGGGATATGGTTTTGCTTGATGAACTGACGTATATGGTGGCGTATGACTATTTGCCACTGGATGTATGGACCGGGTCATCTGACACCATC
1229	cadA	AAGCTTTGCTCGAAGAAACTATGGCCCGGTAGGTAGCCTGTTCTATGATTTCTTTGGTCCGAATACCATGAAATCTGATATTTTGTATGGACCGGGTCATCTGACACCATC
1230	cadA	AAGCTTTGCTCGAAGAAACTATGCTACATGGTGACCAACGGTACTTCCACTGCGAACAAAATTGTTGGTATGTACTCTGCTCTGTATGGACCGGGTCATCTGACACCATC
1231	cadA	AAGCTTTGCTCGAAGAAACTATGGTGAAGGTAAATATACTTTCTGTACTCCTGGTCACATGGGCGGTACTGCATTCCAGAATGTATGGACCGGGTCATCTGACACCATC
1232	cadA	AAGCTTTGCTCGAAGAAACTATGCGTCTCTGTATCGTGAAGATCCTGAATTCTATGAAAACATGCGTATTCAGGAACTGGCTCTGTATGGACCGGGTCATCTGACACCATC
1233	cadA	AAGCTTTGCTCGAAGAAACTATGCAAAAACATCGATAACGAGCACATGTATCTTGACCCGATCAAAGTCACCCTGCTGACTCTGTATGGACCGGGTCATCTGACACCATC
1234	cadB	AAGCTTTGCTCGAAGAAACTATGTAACCACTATTGGTCTGGTGCTGGTTCTTATTCCTGTGGTGATGACTGCTATTGTTGGTGTATGGACCGGGTCATCTGACACCATC
1235	cadB	AAGCTTTGCTCGAAGAAACTATGTTTCTACTCTTGCGTTGACCTGATTCGTTTTGAAGGCGTTAACATCCGCAACTTTGTCTGTATGGACCGGGTCATCTGACACCATC
1236	cadB	AAGCTTTGCTCGAAGAAACTATGATTGCATTATTACCTGCGAACCTAGCAAGTATCGGTGGTATTGCTATCTGGGGTTGGATTTGTATGGACCGGGTCATCTGACACCATC
1237	cadB	AAGCTTTGCTCGAAGAAACTATGATCTCTATTATTGGTGCAATGTCGCTGGCGTATGTATATGCCCGACTGGCAACAAAAAACTGTATGGACCGGGTCATCTGACACCATC
1238	cadB	AAGCTTTGCTCGAAGAAACTATGATACTGCGGATACCACTGATGGTCATGCGATCATTAAAAGTATTCTGCTCTGCCTGTGTGTATGGACCGGGTCATCTGACACCATC
1239	cadC	AAGCTTTGCTCGAAGAAACTATGAGGGGCAAACACCCTTTACTGGATTGAAAATGGTATATTCCAGACTTCTGTTCCTTATGTTGTATGGACCGGGTCATCTGACACCATC
1240	cadC	AAGCTTTGCTCGAAGAAACTATGCGTGCGCCATTCTCAACATCCTTTAGATGAAAAACAATTAGCAGCACTGAACACAGAAATGTATGGACCGGGTCATCTGACACCATC
1241	cadC	AAGCTTTGCTCGAAGAAACTATGAGGCACATGATTATTTACTGCATGGCGATGATAAATCATTGAACCGTGCCAGTGAATTATTGTATGGACCGGGTCATCTGACACCATC
1242	cadC	AAGCTTTGCTCGAAGAAACTATGGATGGTTCAACCATGCTGGATAAACGTTATGTCATCACTAACGGTAATCAGCTGGCGATTGTATGGACCGGGTCATCTGACACCATC
1243	cadC	AAGCTTTGCTCGAAGAAACTATGTGGTGCATGACAAAATCAACTACAACATTGATGAACCGAGCAGTTCCGGTAAAACATTATTGTATGGACCGGGTCATCTGACACCATC
1244	caiA	AAGCTTTGCTCGAAGAAACTATGCGATCAAATTAAACTCCATGAAAAACATGCTGTATGAAGCAGCGTGGAAAGCAGACAACGTGTATGGACCGGGTCATCTGACACCATC
1245	caiA	AAGCTTTGCTCGAAGAAACTATGAAAATTCGCCCACATGGCGATCAAATTAAACTCCATGAAAAACATGCTGTATGAAGCAGCTGTATGGACCGGGTCATCTGACACCATC
1246	caiA	AAGCTTTGCTCGAAGAAACTATGGATCAAATTAAACTCCATGAAAAACATGCTGTATGAAGCAGCGTGGAAAGCAGACAACGGTGTATGGACCGGGTCATCTGACACCATC
1247	caiA	AAGCTTTGCTCGAAGAAACTATGTGATTCAGGAAAAATTCGCCCACATGGCGATCAAATTAAACTCCATGAAAAACATGCTGTTGTATGGACCGGGTCATCTGACACCATC
1248	caiA	AAGCTTTGCTCGAAGAAACTATGCGTTTCCAGTTGATTCAGGAAAAATTCGCCCACATGGCGATCAAATTAAACTCCATGAAATGTATGGACCGGGTCATCTGACACCATC
1249	caiB	AAGCTTTGCTCGAAGAAACTATGCACGCGCTGTCGTTAAATATTTTCAAAGATGAAGGCCGCGAAGCGTTTCTGAAATTAATGTGTATGGACCGGGTCATCTGACACCATC
1250	caiB	AAGCTTTGCTCGAAGAAACTATGATTTTGAAAAATATCGGCTACAGCGAAAACGACATTCAGGAGTTGGTCAGCAAAGGTCTGTGTATGGACCGGGTCATCTGACACCATC
1251	caiB	AAGCTTTGCTCGAAGAAACTATGCATTTTGAAAAATATCGGCTACAGCGAAAACGACATTCAGGAGTTGGTCAGCAAAGGTCTTGTATGGACCGGGTCATCTGACACCATC
1252	caiB	AAGCTTTGCTCGAAGAAACTATGTACATCGTGATGGAACTGGTGGGCATTACCCAAATTGAAGAGTGCTTTAAAGATATTGGCTGTATGGACCGGGTCATCTGACACCATC
1253	caiB	AAGCTTTGCTCGAAGAAACTATGGCGCTGTCGTTAAATATTTTCAAAGATGAAGGCCGCGAAGCGTTTCTGAAATTAATGGAATGTATGGACCGGGTCATCTGACACCATC
1254	caiC	AAGCTTTGCTCGAAGAAACTATGCTATCCTATGTATCAACAGATTCAGCAGGAAGATGCCACTCAATTGCGGCACATTTGCTGTATGGACCGGGTCATCTGACACCATC
1255	caiC	AAGCTTTGCTCGAAGAAACTATGTAAAGGCATACCTGGGAAAACCATCTTCAAAGAGTACTTTCTCAACCCACAAGCCACTTGTATGGACCGGGTCATCTGACACCATC
1256	caiC	AAGCTTTGCTCGAAGAAACTATGGTGATGTTTTATCTCAACTTGTCGGAGCAGGAAAAAGATGCGTTTTGTGAACGCTTCGTGTATGGACCGGGTCATCTGACACCATC
1257	caiC	AAGCTTTGCTCGAAGAAACTATGGATAGAGGTGCAATGGATATCATTGGCGGACAACATCTACGTCAAATGTGGGACGATCTTTGTATGGACCGGGTCATCTGACACCATC
1258	caiC	AAGCTTTGCTCGAAGAAACTATGATGATGGCGTGAGTTCGTTTACTCAACTGAAAAATCAACAACCTGCCACCTTGTGCTATGTGTATGGACCGGGTCATCTGACACCATC
1259	caiD	AAGCTTTGCTCGAAGAAACTATGATCATTACATCTGACCCGCAATGGATCAATTCTGGAAATTACCCTTGATCGTCCAAAAGCTGTATGGACCGGGTCATCTGACACCATC
1260	caiD	AAGCTTTGCTCGAAGAAACTATGCGTCCCTGAAAAAGCAAAAATGGAGAAAAGGAATGAGTGAATCATTACATCTGACCCGCATGTATGGACCGGGTCATCTGACACCATC
1261	caiD	AAGCTTTGCTCGAAGAAACTATGATCGTCCAAAAGCGAATGCTATTGATGCAAAAACCAGCTTTGAAATGGGCGAAGTATTTCTGTATGGACCGGGTCATCTGACACCATC
1262	caiD	AAGCTTTGCTCGAAGAAACTATGGATCGTCCAAAAGCGAATGCTATTGATGCAAAAACCAGCTTTGAAATGGGCGAAGTATTTTGTATGGACCGGGTCATCTGACACCATC
1263	caiD	AAGCTTTGCTCGAAGAAACTATGTGCATTTTTTGCAGGGATGTTGTCGTCCCTGAAAAAGCAAAAATGGAGAAAAGGAATGAGTGTATGGACCGGGTCATCTGACACCATC
1264	caiE	AAGCTTTGCTCGAAGAAACTATGTAGTGACGACGAGTTACACTGGAAACGGTTGAATACCAAAGAGTATCAGGATCTTGTCGGTGTATGGACCGGGTCATCTGACACCATC
1265	caiE	AAGCTTTGCTCGAAGAAACTATGTACGCAATGTTAGTGACGACGAGTTACACTGGAAACGGTTGAATACCAAAGAGTATCAGGTGTATGGACCGGGTCATCTGACACCATC
1266	caiE	AAGCTTTGCTCGAAGAAACTATGGGTTGAATACCAAAGAGTATCAGGATCTTGTCGGGCGCTGTCATGTATCGTTACATGAATGTATGGACCGGGTCATCTGACACCATC
1267	caiE	AAGCTTTGCTCGAAGAAACTATGGCTGTACGCAATGTTAGTGACGACGAGTTACACTGGAAACGGTTGAATACCAAAGAGTATGTATGGACCGGGTCATCTGACACCATC
1268	caiE	AAGCTTTGCTCGAAGAAACTATGTGAATACCAAAGAGTATCAGGATCTTGTCGGGCGCTGTCATGTATCGTTACATGAAACGTGTATGGACCGGGTCATCTGACACCATC
1269	caiF	AAGCTTTGCTCGAAGAAACTATGCGAATGGATGATGGCTGAAAATCGGTGGGTGATAGCAAGAGAGATCTCTATTCATTTCGATGTATGGACCGGGTCATCTGACACCATC
1270	caiF	AAGCTTTGCTCGAAGAAACTATGTATGTTGAAAAACCACTCTACTTGTTAATCGCCGAATGGATGATGGCTGAAAATCGGTGGTGTATGGACCGGGTCATCTGACACCATC
1271	caiF	AAGCTTTGCTCGAAGAAACTATGGGTGGGTGATAGCAAGAGAGATCTCTATTCATTTCGATATTGAACACAGCAAGGCGGTTATGTATGGACCGGGTCATCTGACACCATC
1272	caiF	AAGCTTTGCTCGAAGAAACTATGAACACAGCAAGGCGGTTAATACCCTGACTTATATTCTGTCGGAAGTCACAGAAATAAGCTTGTATGGACCGGGTCATCTGACACCATC
1273	caiF	AAGCTTTGCTCGAAGAAACTATGCCGAATGGATGATGGCTGAAAATCGGTGGGTGATAGCAAGAGAGATCTCTATTCATTTCGTGTATGGACCGGGTCATCTGACACCATC
1274	caiT	AAGCTTTGCTCGAAGAAACTATGTGTTGGCTTACAGTCAGAGATCTGGATGCAGCGAATGTCGTTATTAATGCTGTATTCAGTTGTATGGACCGGGTCATCTGACACCATC
1275	caiT	AAGCTTTGCTCGAAGAAACTATGGCGAATGTCGTTATTAATGCTGTATTCAGTTACGTCACCAATGTATGGGGATGGGCATTTTGTATGGACCGGGTCATCTGACACCATC
1276	caiT	AAGCTTTGCTCGAAGAAACTATGTGTATTCAGTTACGTCACCAATGTATGGGGATGGGCATTTGAATGGTATATGGTGGTGATTGTATGGACCGGGTCATCTGACACCATC
1277	caiT	AAGCTTTGCTCGAAGAAACTATGTTAATAATCGTCGGCATACTTTGTTGGCTTACAGTCAGAGATCTGGATGCAGCGAATGTCTGTATGGACCGGGTCATCTGACACCATC
1278	caiT	AAGCTTTGCTCGAAGAAACTATGCGAAGGTTTTCTTTCCGCCGTTAATAATCGTCGGCATACTTTGTTGGCTTACAGTCAGTGTATGGACCGGGTCATCTGACACCATC
1279	can	AAGCTTTGCTCGAAGAAACTATGGTTCAGTATGCAGTGGATGTACTCGAAGTTGAACACATTATTATCTGTGGCCACTACGGTTGTATGGACCGGGTCATCTGACACCATC
1280	can	AAGCTTTGCTCGAAGAAACTATGTCAGTATGCAGTGGATGTACTCGAAGTTGAACACATTATTATCTGTGGCCACTACGGTTGTGTATGGACCGGGTCATCTGACACCATC
1281	can	AAGCTTTGCTCGAAGAAACTATGTGGTTCAGTATGCAGTGGATGTACTCGAAGTTGAACACATTATTATCTGTGGCCACTACGTGTATGGACCGGGTCATCTGACACCATC
1282	can	AAGCTTTGCTCGAAGAAACTATGCGTGGTTCAGTATGCAGTGGATGTACTCGAAGTTGAACACATTATTATCTGTGGCCACTATGTATGGACCGGGTCATCTGACACCATC
1283	can	AAGCTTTGCTCGAAGAAACTATGACTGCCTTTCCGTGGTTCAGTATGCAGTGGATGTACTCGAAGTTGAACACATTATTATCTTGTATGGACCGGGTCATCTGACACCATC
1284	carA	AAGCTTTGCTCGAAGAAACTATGTCCTTCCTATTCTCGTCAAATCGTTACTCTTACTTATCCCCATATTGGCAATGTCGGCACTGTATGGACCGGGTCATCTGACACCATC
1285	carA	AAGCTTTGCTCGAAGAAACTATGATTCTCGTCAAATCGTTACTCTTACTTATCCCCATATTGGCAATGTCGGCACCAATGACGTGTATGGACCGGGTCATCTGACACCATC
1286	carA	AAGCTTTGCTCGAAGAAACTATGATCCTTCCTATTCTCGTCAAATCGTTACTCTTACTTATCCCCATATTGGCAATGTCGGCATGTATGGACCGGGTCATCTGACACCATC
1287	carA	AAGCTTTGCTCGAAGAAACTATGCGGTTGGGGAAGTCGTTTTCAATACTTCAATGACCGGTTATCAAGAAATCCTCACTGATCTGTATGGACCGGGTCATCTGACACCATC
1288	carA	AAGCTTTGCTCGAAGAAACTATGGGTTGGGGAAGTCGTTTTCAATACTTCAATGACCGGTTATCAAGAAATCCTCACTGATCCTGTATGGACCGGGTCATCTGACACCATC
1289	carB	AAGCTTTGCTCGAAGAAACTATGCATCGACTATGTGGTTACTAAAATTCCTCGCTTCAACTTCGAAAAATTCGCCGGTGCTAATGTATGGACCGGGTCATCTGACACCATC
1290	carB	AAGCTTTGCTCGAAGAAACTATGTCGAGCCGTCCATCGACTATGTGGTTACTAAAATTCCTCGCTTCAACTTCGAAAAATTCGTGTATGGACCGGGTCATCTGACACCATC
1291	carB	AAGCTTTGCTCGAAGAAACTATGCCTTCGAGCCGTCCATCGACTATGTGGTTACTAAAATTCCTCGCTTCAACTTCGAAAAATTGTATGGACCGGGTCATCTGACACCATC
1292	carB	AAGCTTTGCTCGAAGAAACTATGTGATGCAACCTACATCGAGCCGATTCACTGGGAAGTTGTACGCAAGATTATTGAAAAAGATGTATGGACCGGGTCATCTGACACCATC
1293	carB	AAGCTTTGCTCGAAGAAACTATGGTCCATCGACTATGTGGTTACTAAAATTCCTCGCTTCAACTTCGAAAAATTCGCCGGTGTGTATGGACCGGGTCATCTGACACCATC
1294	cbl	AAGCTTTGCTCGAAGAAACTATGCGTCATATTCGGGAACTGGAGGATGAACTTGGCATCGAAATATTTGTTCGACGAGGTAAGTGTATGGACCGGGTCATCTGACACCATC
1295	cbl	AAGCTTTGCTCGAAGAAACTATGTTTTTGATGCTAATACTGTCTGGTTGGGACTGAAGCGAGGACAACTTCAGCGTAACTATTGTATGGACCGGGTCATCTGACACCATC
1296	cbl	AAGCTTTGCTCGAAGAAACTATGGGGCAAAGCATTACTGGTCATTGCAGAACGTATTCTGAATGAAGCCAGTAATGTTCGTCTGTATGGACCGGGTCATCTGACACCATC
1297	cbl	AAGCTTTGCTCGAAGAAACTATGCTATTGCAACGACGCATACTCAGGCACGTTATAGCTTGCCAGAGGTCATTAAAGCTTTTCTGTATGGACCGGGTCATCTGACACCATC
1298	cbl	AAGCTTTGCTCGAAGAAACTATGCTCACGTATTGATGACGCATTTGCCCGCAAAGGTTTGCTGGCAGATATTGTATTAAGTGTGTATGGACCGGGTCATCTGACACCATC
1299	cbpA	AAGCTTTGCTCGAAGAAACTATGTTTATAACGCCTTTGGCATGATCGAACAGGAAATTCCGAAAACGCTGAATGTGAAGATCCTGTATGGACCGGGTCATCTGACACCATC
1300	cbpA	AAGCTTTGCTCGAAGAAACTATGCGACGGTCAGAGTTTTAACGCCGAAGATTTTGACGATATCTTCTCGTCAATTTTCGGTCATGTATGGACCGGGTCATCTGACACCATC
1301	cbpA	AAGCTTTGCTCGAAGAAACTATGGATATTGAAATCGAAGTGGCGGTATTCCTCGAAGAAACGCTTACTGAGCATAAGCGTACCTGTATGGACCGGGTCATCTGACACCATC
1302	cbpA	AAGCTTTGCTCGAAGAAACTATGCGATATTGAAATCGAAGTGGCGGTATTCCTCGAAGAAACGCTTACTGAGCATAAGCGTACTGTATGGACCGGGTCATCTGACACCATC
1303	cbpA	AAGCTTTGCTCGAAGAAACTATGGGTTTATAACGCCTTTGGCATGATCGAACAGGAAATTCCGAAAACGCTGAATGTGAAGATTGTATGGACCGGGTCATCTGACACCATC
1304	cbpM	AAGCTTTGCTCGAAGAAACTATGATGGCTAATGTTACGGTGACTTTTACTATTACCGAATTTTGCCTGCATACCGGCATCTCTTGTATGGACCGGGTCATCTGACACCATC
1305	cbpM	AAGCTTTGCTCGAAGAAACTATGGGCTAATGTTACGGTGACTTTTACTATTACCGAATTTTGCCTGCATACCGGCATCTCTGATGTATGGACCGGGTCATCTGACACCATC
1306	cbpM	AAGCTTTGCTCGAAGAAACTATGACTATTACCGAATTTTGCCTGCATACCGGCATCTCTGAAGAGGAGTTGAATGAAATTGTCTGTATGGACCGGGTCATCTGACACCATC
1307	cbpM	AAGCTTTGCTCGAAGAAACTATGTTACGGTGACTTTTACTATTACCGAATTTTGCCTGCATACCGGCATCTCTGAAGAGGAGTGTATGGACCGGGTCATCTGACACCATC
1308	cbpM	AAGCTTTGCTCGAAGAAACTATGTGGCTAATGTTACGGTGACTTTTACTATTACCGAATTTTGCCTGCATACCGGCATCTCTGTGTATGGACCGGGTCATCTGACACCATC
1309	cbrA	AAGCTTTGCTCGAAGAAACTATGCTGAAAGAGAAAATGAGCGCCTTTCAGTTCCAGTTTGGTAAGACGGTGAAAAGCGAAAAATGTATGGACCGGGTCATCTGACACCATC
1310	cbrA	AAGCTTTGCTCGAAGAAACTATGGCTTTAAGAAAGTGGATTATGCGCAGTGGTGTGGCACATATTCCACAGTTGAAGGATTATGTATGGACCGGGTCATCTGACACCATC
1311	cbrA	AAGCTTTGCTCGAAGAAACTATGCGGAGAAACATCCGGTGCCGTTCTACTCCTGCATCTTTGATAATTCGATAACTAACTGTTGTATGGACCGGGTCATCTGACACCATC
1312	cbrA	AAGCTTTGCTCGAAGAAACTATGTGAAAGAGAAAATGAGCGCCTTTCAGTTCCAGTTTGGTAAGACGGTGAAAAGCGAAAAATGTATGGACCGGGTCATCTGACACCATC
1313	cbrA	AAGCTTTGCTCGAAGAAACTATGCTGAAAGAGAAAATGAGCGCCTTTCAGTTCCAGTTTGGTAAGACGGTGAAAAGCGAAAATGTATGGACCGGGTCATCTGACACCATC
1314	cbrC	AAGCTTTGCTCGAAGAAACTATGTCGGTATTAGAAATTCTGATCTAGCTAAATGCCTGCAAAAGGGTGGTCATTGTCAGGGTTTGTATGGACCGGGTCATCTGACACCATC
1315	cbrC	AAGCTTTGCTCGAAGAAACTATGTTTATTACTCGGGTCCCTTTTATTGCGTTGATGAAGTTGAACATCTCTGTCCGTGGTGTATGTATGGACCGGGTCATCTGACACCATC
1316	cbrC	AAGCTTTGCTCGAAGAAACTATGGCATTTGAACAGGATAAAACCGTAGAGTGCGATTGCTGTGAACAACAGACGTCAGTTTATTGTATGGACCGGGTCATCTGACACCATC
1317	cbrC	AAGCTTTGCTCGAAGAAACTATGCAGGATGATGCCAGCATAGAAGGTGTTGAATTTGAGTATGATGAAGAGGACGAATTTGCCTGTATGGACCGGGTCATCTGACACCATC
1318	cbrC	AAGCTTTGCTCGAAGAAACTATGAATTCAAATATCATCCCAAGCCACTGGAAACAGGCGCATTTGAACAGGATAAAACCGTAGTGTATGGACCGGGTCATCTGACACCATC
1319	cca	AAGCTTTGCTCGAAGAAACTATGCAATGCTGAACCCAAAAACCATCGTCAAATTATTTGATTCCATCGATGCCTGGCGTAAACTGTATGGACCGGGTCATCTGACACCATC
1320	cca	AAGCTTTGCTCGAAGAAACTATGATCCACACCTTCCCAATGCTGAACCCAAAAACCATCGTCAAATTATTTGATTCCATCGATTGTATGGACCGGGTCATCTGACACCATC
1321	cca	AAGCTTTGCTCGAAGAAACTATGCACGATCTCATCCACACCTTCCCAATGCTGAACCCAAAAACCATCGTCAAATTATTTGATTGTATGGACCGGGTCATCTGACACCATC
1322	cca	AAGCTTTGCTCGAAGAAACTATGTTCACGATCTCATCCACACCTTCCCAATGCTGAACCCAAAAACCATCGTCAAATTATTTGTGTATGGACCGGGTCATCTGACACCATC
1323	cca	AAGCTTTGCTCGAAGAAACTATGGTTTCACGATCTCATCCACACCTTCCCAATGCTGAACCCAAAAACCATCGTCAAATTATTTGTATGGACCGGGTCATCTGACACCATC
1324	cchA	AAGCTTTGCTCGAAGAAACTATGATGGAAGCATTAGGAATGATCGAAACCCGGGGCCTGGTTGCACTGATTGAGTGTATGGACCGGGTCATCTGACACCATC
1325	cchA	AAGCTTTGCTCGAAGAAACTATGCATTAGGAATGATCGAAACCCGGGGCCTGGTTGCACTGATTGAGGCTTCTGACTGTATGGACCGGGTCATCTGACACCATC
1326	cchA	AAGCTTTGCTCGAAGAAACTATGCATTAGGAATGATCGAAACCCGGGGCCTGGTTGCACTGATTGAGGCTTCTGTATGGACCGGGTCATCTGACACCATC
1327	cchA	AAGCTTTGCTCGAAGAAACTATGGAAGCATTAGGAATGATCGAAACCCGGGGCCTGGTTGCACTGATTGAGGTGTATGGACCGGGTCATCTGACACCATC
1328	cchA	AAGCTTTGCTCGAAGAAACTATGGGAAGCATTAGGAATGATCGAAACCCGGGGCCTGGTTGCACTGATTGAGTGTATGGACCGGGTCATCTGACACCATC
1329	cchB	AAGCTTTGCTCGAAGAAACTATGCATGACAAATTGCTGATGGTGGAAATGATTGATCCACAAGGTAATCCTGACGGGCAATGTATGGACCGGGTCATCTGACACCATC
1330	cchB	AAGCTTTGCTCGAAGAAACTATGTGACAAATTGCTGATGGTGGAAATGATTGATCCACAAGGTAATCCTGACGGGCAATGTGTATGGACCGGGTCATCTGACACCATC
1331	cchB	AAGCTTTGCTCGAAGAAACTATGCATGACAAATTGCTGATGGTGGAAATGATTGATCCACAAGGTAATCCTGACGGGCAATGCTGTATGGACCGGGTCATCTGACACCATC
1332	cchB	AAGCTTTGCTCGAAGAAACTATGGCATGACAAATTGCTGATGGTGGAAATGATTGATCCACAAGGTAATCCTGACGGGCAATGTGTATGGACCGGGTCATCTGACACCATC
1333	cchB	AAGCTTTGCTCGAAGAAACTATGGACTGGCGCATGACAAATTGCTGATGGTGGAAATGATTGATCCACAAGGTAATCCTGACTGTATGGACCGGGTCATCTGACACCATC
1334	ccmA	AAGCTTTGCTCGAAGAAACTATGAGAGAGTTACTTTGTGAGCGGGATGAACGAACCTTATTTAGTGGCTTGTCATTTACGCTGTGTATGGACCGGGTCATCTGACACCATC
1335	ccmA	AAGCTTTGCTCGAAGAAACTATGCAGAGAGTTACTTTGTGAGCGGGATGAACGAACCTTATTTAGTGGCTTGTCATTTACGCTTGTATGGACCGGGTCATCTGACACCATC
1336	ccmA	AAGCTTTGCTCGAAGAAACTATGGAGTTACTTTGTGAGCGGGATGAACGAACCTTATTTAGTGGCTTGTCATTTACGCTGAACTGTATGGACCGGGTCATCTGACACCATC
1337	ccmA	AAGCTTTGCTCGAAGAAACTATGAGCCAGAGAGTTACTTTGTGAGCGGGATGAACGAACCTTATTTAGTGGCTTGTCATTTATGTATGGACCGGGTCATCTGACACCATC
1338	ccmA	AAGCTTTGCTCGAAGAAACTATGAGAGAGTTACTTTGTGAGCGGGATGAACGAACCTTATTTAGTGGCTTGTCATTTACGCTTGTATGGACCGGGTCATCTGACACCATC
1339	ccmB	AAGCTTTGCTCGAAGAAACTATGGTTACTCATCCTTTCGCCACTGGTAGCAATGCTACTGGGAATGGATGTTTATGGCTGTATGGACCGGGTCATCTGACACCATC
1340	ccmB	AAGCTTTGCTCGAAGAAACTATGAAATCGCCAACCCGCTGTGGTTCTTCCTGATTGTAATTACCCTTTTTCCGCTCAGTATCTGTATGGACCGGGTCATCTGACACCATC
1341	ccmB	AAGCTTTGCTCGAAGAAACTATGGAAATCGCCAACCCGCTGTGGTTCTTCCTGATTGTAATTACCCTTTTTCCGCTCAGTATTGTATGGACCGGGTCATCTGACACCATC
1342	ccmB	AAGCTTTGCTCGAAGAAACTATGTTACTCATCCTTTCGCCACTGGTAGCAATGCTACTGGGAATGGATGTTTATGGCTGTGTATGGACCGGGTCATCTGACACCATC
1343	ccmB	AAGCTTTGCTCGAAGAAACTATGGTTACTCATCCTTTCGCCACTGGTAGCAATGCTACTGGGAATGGATGTTTATGGCTTGTATGGACCGGGTCATCTGACACCATC
1344	ccmC	AAGCTTTGCTCGAAGAAACTATGTAATTTGATTTTGCTGATGGAAAAACGCCGTCCGTGGGTGAGTGAACTGATACTGAAATGTATGGACCGGGTCATCTGACACCATC
1345	ccmC	AAGCTTTGCTCGAAGAAACTATGAATTTGATTTTGCTGATGGAAAAACGCCGTCCGTGGGTGAGTGAACTGATACTGAAAAGTGTATGGACCGGGTCATCTGACACCATC
1346	ccmC	AAGCTTTGCTCGAAGAAACTATGGTAATTTGATTTTGCTGATGGAAAAACGCCGTCCGTGGGTGAGTGAACTGATACTGAATGTATGGACCGGGTCATCTGACACCATC
1347	ccmC	AAGCTTTGCTCGAAGAAACTATGAATTTGATTTTGCTGATGGAAAAACGCCGTCCGTGGGTGAGTGAACTGATACTGAAAAGATGTATGGACCGGGTCATCTGACACCATC
1348	ccmC	AAGCTTTGCTCGAAGAAACTATGATTTGATTTTGCTGATGGAAAAACGCCGTCCGTGGGTGAGTGAACTGATACTGAAAAGAGTGTATGGACCGGGTCATCTGACACCATC
1349	ccmD	AAGCTTTGCTCGAAGAAACTATGCTGCATTTGCTTCCTGGAATGAATTTTTCGCAATGGGCGGTTACGCCTTTTTTGTCTGTATGGACCGGGTCATCTGACACCATC
1350	ccmD	AAGCTTTGCTCGAAGAAACTATGATTTGCTTCCTGGAATGAATTTTTCGCAATGGGCGGTTACGCCTTTTTTGTCTGGTGTATGGACCGGGTCATCTGACACCATC
1351	ccmD	AAGCTTTGCTCGAAGAAACTATGGCATTTGCTTCCTGGAATGAATTTTTCGCAATGGGCGGTTACGCCTTTTTTGTCTGTATGGACCGGGTCATCTGACACCATC
1352	ccmD	AAGCTTTGCTCGAAGAAACTATGCTGCATTTGCTTCCTGGAATGAATTTTTCGCAATGGGCGGTTACGCCTTTTTTGTGTATGGACCGGGTCATCTGACACCATC
1353	ccmD	AAGCTTTGCTCGAAGAAACTATGATTTGCTTCCTGGAATGAATTTTTCGCAATGGGCGGTTACGCCTTTTTTGTCTGTGTATGGACCGGGTCATCTGACACCATC
1354	ccmE	AAGCTTTGCTCGAAGAAACTATGTGGAAAAAGGCAATCATATCCTCGCGAAAGAAGTGCTGGCGAAACACGATGAAAACTATATGTATGGACCGGGTCATCTGACACCATC
1355	ccmE	AAGCTTTGCTCGAAGAAACTATGAAAAGGCAATCATATCCTCGCGAAAGAAGTGCTGGCGAAACACGATGAAAACTATACGTGTATGGACCGGGTCATCTGACACCATC
1356	ccmE	AAGCTTTGCTCGAAGAAACTATGCTGAAAGTGACCTTCACCATTTACGATGCTGAAGGCTCAGTGGATGTCTCTTACGAAGTGTATGGACCGGGTCATCTGACACCATC
1357	ccmE	AAGCTTTGCTCGAAGAAACTATGGAAAAAGGCAATCATATCCTCGCGAAAGAAGTGCTGGCGAAACACGATGAAAACTATACTGTATGGACCGGGTCATCTGACACCATC
1358	ccmE	AAGCTTTGCTCGAAGAAACTATGCTGGAAAAAGGCAATCATATCCTCGCGAAAGAAGTGCTGGCGAAACACGATGAAAACTATTGTATGGACCGGGTCATCTGACACCATC
1359	ccmF	AAGCTTTGCTCGAAGAAACTATGCGATAGCGTCGATATTCATGAATATCGCTTCACCTTCCGTGATGTCAAAGAGGTGACTTGTATGGACCGGGTCATCTGACACCATC
1360	ccmF	AAGCTTTGCTCGAAGAAACTATGGATAGCGTCGATATTCATGAATATCGCTTCACCTTCCGTGATGTCAAAGAGGTGACTGGCTGTATGGACCGGGTCATCTGACACCATC
1361	ccmF	AAGCTTTGCTCGAAGAAACTATGGCGATAGCGTCGATATTCATGAATATCGCTTCACCTTCCGTGATGTCAAAGAGGTGACTGTGTATGGACCGGGTCATCTGACACCATC
1362	ccmF	AAGCTTTGCTCGAAGAAACTATGGCGATAGCGTCGATATTCATGAATATCGCTTCACCTTCCGTGATGTCAAAGAGGTGACTGTATGGACCGGGTCATCTGACACCATC
1363	ccmF	AAGCTTTGCTCGAAGAAACTATGTAGCGTCGATATTCATGAATATCGCTTCACCTTCCGTGATGTCAAAGAGGTGACTGGTGTATGGACCGGGTCATCTGACACCATC
1364	ccmG	AAGCTTTGCTCGAAGAAACTATGTGAAGCGCAAAGTATTGTTAATTCCGTTGATTATCTTCCTGGCGATTGCCGCGTGTATGGACCGGGTCATCTGACACCATC
1365	ccmG	AAGCTTTGCTCGAAGAAACTATGATCTGAATCCTCGCGTCTGGGAAGAAGAGATCAAGCCGCTGTGGGAGAAATACAGTAAGTGTATGGACCGGGTCATCTGACACCATC
1366	ccmG	AAGCTTTGCTCGAAGAAACTATGGAAGCGCAAAGTATTGTTAATTCCGTTGATTATCTTCCTGGCGATTGCCGCGGTGTATGGACCGGGTCATCTGACACCATC
1367	ccmG	AAGCTTTGCTCGAAGAAACTATGCATGAACTATAAAGACGATCGCCAGAAGGCAATCAGCTGGCTGAAAGAGCTGGTGTATGGACCGGGTCATCTGACACCATC
1368	ccmG	AAGCTTTGCTCGAAGAAACTATGATGAACTATAAAGACGATCGCCAGAAGGCAATCAGCTGGCTGAAAGAGCTGGTGTATGGACCGGGTCATCTGACACCATC
1369	ccmH	AAGCTTTGCTCGAAGAAACTATGAGTAAAAAAGAGATTGTCGATTATATGGTGGCGCGTTACGGCAACTTCGTCACTTACGATTGTATGGACCGGGTCATCTGACACCATC
1370	ccmH	AAGCTTTGCTCGAAGAAACTATGCCACCGACCTGCGTCAGAAAGTGTATGAACTGATGCAGGAAGGTAAAAGTAAAAAAGAGATGTATGGACCGGGTCATCTGACACCATC
1371	ccmH	AAGCTTTGCTCGAAGAAACTATGAAGTAAAAAAGAGATTGTCGATTATATGGTGGCGCGTTACGGCAACTTCGTCACTTACGATGTATGGACCGGGTCATCTGACACCATC
1372	ccmH	AAGCTTTGCTCGAAGAAACTATGGGAAGGTAAAAGTAAAAAAGAGATTGTCGATTATATGGTGGCGCGTTACGGCAACTTCGTTGTATGGACCGGGTCATCTGACACCATC
1373	ccmH	AAGCTTTGCTCGAAGAAACTATGAAAGTAAAAAAGAGATTGTCGATTATATGGTGGCGCGTTACGGCAACTTCGTCACTTACGTGTATGGACCGGGTCATCTGACACCATC
1374	cdaR	AAGCTTTGCTCGAAGAAACTATGAAACAGCGGATGCCAGAAAGTCGCTGCTATTTTTATCAGGATCTGATGTTACCTGTGTTATGTATGGACCGGGTCATCTGACACCATC
1375	cdaR	AAGCTTTGCTCGAAGAAACTATGTAAACAGCGGATGCCAGAAAGTCGCTGCTATTTTTATCAGGATCTGATGTTACCTGTGTTTGTATGGACCGGGTCATCTGACACCATC
1376	cdaR	AAGCTTTGCTCGAAGAAACTATGTTATTCATCGTAATACCCTGGAGTATCGGCTTAATCGTATATCGGAACTGACCGGGCTTGTGTATGGACCGGGTCATCTGACACCATC
1377	cdaR	AAGCTTTGCTCGAAGAAACTATGTGCCAGAAAGTCGCTGCTATTTTTATCAGGATCTGATGTTACCTGTGTTACTCGACAGTTTGTATGGACCGGGTCATCTGACACCATC
1378	cdaR	AAGCTTTGCTCGAAGAAACTATGGTTTATTCATCGTAATACCCTGGAGTATCGGCTTAATCGTATATCGGAACTGACCGGGCTTGTATGGACCGGGTCATCTGACACCATC
1379	cdd	AAGCTTTGCTCGAAGAAACTATGACCGTTGCAGGGAGCGTTAATTCTGTTGAATCTCAAGGGTTATGATTACCCGGATATCTGTATGGACCGGGTCATCTGACACCATC
1380	cdd	AAGCTTTGCTCGAAGAAACTATGTTGCAGGGAGCGTTAATTCTGTTGAATCTCAAGGGTTATGATTACCCGGATATCCAGCTGTATGGACCGGGTCATCTGACACCATC
1381	cdd	AAGCTTTGCTCGAAGAAACTATGCACCGTTGCAGGGAGCGTTAATTCTGTTGAATCTCAAGGGTTATGATTACCCGGATATTGTATGGACCGGGTCATCTGACACCATC
1382	cdd	AAGCTTTGCTCGAAGAAACTATGCAACTTGCGGATAACTTGCAATCTGCACTGGAACCTATTCTGGCAGACAAGTACTTCTGTATGGACCGGGTCATCTGACACCATC
1383	cdd	AAGCTTTGCTCGAAGAAACTATGCCGTTGCAGGGAGCGTTAATTCTGTTGAATCTCAAGGGTTATGATTACCCGGATATCCAGTGTATGGACCGGGTCATCTGACACCATC
1384	cdh	AAGCTTTGCTCGAAGAAACTATGATATTCATATCTCTTGTATTCGTCCTGATGTGCGCAAACAGCTGGATAACAATCTGGCGATGTATGGACCGGGTCATCTGACACCATC
1385	cdh	AAGCTTTGCTCGAAGAAACTATGGGGCGTACGCAAAACCATTTTCATATTCATATCTCTTGTATTCGTCCTGATGTGCGCAAATGTATGGACCGGGTCATCTGACACCATC
1386	cdh	AAGCTTTGCTCGAAGAAACTATGCGGATACGTGGTTTTAAAAGATCTTAATGGCCCACTGCAATATCTGTTGATGCCAACGTATGTATGGACCGGGTCATCTGACACCATC
1387	cdh	AAGCTTTGCTCGAAGAAACTATGTAATGGCCCACTGCAATATCTGTTGATGCCAACGTATCGTATTAACGGTACTGAAAGTCCTGTATGGACCGGGTCATCTGACACCATC
1388	cdh	AAGCTTTGCTCGAAGAAACTATGCAGAGTGATAACTCATTTGTATTGCTGGCGACACAACGAAATCTACTGACGCTTAACCGTTGTATGGACCGGGTCATCTGACACCATC
1389	cdsA	AAGCTTTGCTCGAAGAAACTATGCGATCTGACCGAGAGTATGTTTAAGCGTGAAGCAGGAATTAAGGACAGCGGTCATTTAATTGTATGGACCGGGTCATCTGACACCATC
1390	cdsA	AAGCTTTGCTCGAAGAAACTATGTGATGCTTTTTCTGTTGCCGGAATATCACCGAAATATTCATCAACCGCTGGTTGAAATCTTGTATGGACCGGGTCATCTGACACCATC
1391	cdsA	AAGCTTTGCTCGAAGAAACTATGATGCTTTTTCTGTTGCCGGAATATCACCGAAATATTCATCAACCGCTGGTTGAAATCTCATGTATGGACCGGGTCATCTGACACCATC
1392	cdsA	AAGCTTTGCTCGAAGAAACTATGTCTGACCGAGAGTATGTTTAAGCGTGAAGCAGGAATTAAGGACAGCGGTCATTTAATTCCTGTATGGACCGGGTCATCTGACACCATC
1393	cdsA	AAGCTTTGCTCGAAGAAACTATGTTTCTGTTGCCGGAATATCACCGAAATATTCATCAACCGCTGGTTGAAATCTCACTTTGGTGTATGGACCGGGTCATCTGACACCATC
1394	cedA	AAGCTTTGCTCGAAGAAACTATGCAGAACATGCGATAAAGATGGATTCGTTTCGTGATGTCTGGATGCTGCGTGGCAAATATGTGTATGGACCGGGTCATCTGACACCATC
1395	cedA	AAGCTTTGCTCGAAGAAACTATGAACATGCGATAAAGATGGATTCGTTTCGTGATGTCTGGATGCTGCGTGGCAAATATGTTGTGTATGGACCGGGTCATCTGACACCATC
1396	cedA	AAGCTTTGCTCGAAGAAACTATGGATAAAGATGGATTCGTTTCGTGATGTCTGGATGCTGCGTGGCAAATATGTTGCGTTTTGTATGGACCGGGTCATCTGACACCATC
1397	cedA	AAGCTTTGCTCGAAGAAACTATGGATAAAGATGGATTCGTTTCGTGATGTCTGGATGCTGCGTGGCAAATATGTTGCGTTTGTTGTATGGACCGGGTCATCTGACACCATC
1398	cedA	AAGCTTTGCTCGAAGAAACTATGGAACATGCGATAAAGATGGATTCGTTTCGTGATGTCTGGATGCTGCGTGGCAAATATGTGTATGGACCGGGTCATCTGACACCATC
1399	cfa	AAGCTTTGCTCGAAGAAACTATGAAAAACGTGCCTGGATAGTCGGCAAAGAGCATTACGATTTGGGTAATGACTTGTTCAGTGTATGGACCGGGTCATCTGACACCATC
1400	cfa	AAGCTTTGCTCGAAGAAACTATGATATTCCTGCTCCATACTATCGGTTCGAAAAAAACCGATCTGAATGTTGATCCCTGGATTTGTATGGACCGGGTCATCTGACACCATC
1401	cfa	AAGCTTTGCTCGAAGAAACTATGCATAACTTCGGTGCTGATTACGATACTACGTTGATGGCGTGGTATGAACGATTCCTCGTGTATGGACCGGGTCATCTGACACCATC
1402	cfa	AAGCTTTGCTCGAAGAAACTATGGATCCCTTCATGCAATATTCCTGCGCTTACTGGAAAGATGCCGATAATCTGGAATCTGTGTATGGACCGGGTCATCTGACACCATC
1403	cfa	AAGCTTTGCTCGAAGAAACTATGTTTTTAAACGCGTTCTGCAAGAAGGCTCTTTGGGGTTAGGCGAAAGTTATATGGATGGTGTATGGACCGGGTCATCTGACACCATC
1404	chaA	AAGCTTTGCTCGAAGAAACTATGTTACTGGTAGCATTAATTTCTGCGGCAATGTATGGCGTATTTTTGCTGATCCAGACCAAATGTATGGACCGGGTCATCTGACACCATC
1405	chaA	AAGCTTTGCTCGAAGAAACTATGTCTATTCAATCATTATGATTGTTACCGGTGGGCTGGTTGGCTTTTCATTATTGTTGGGCGTGTATGGACCGGGTCATCTGACACCATC
1406	chaA	AAGCTTTGCTCGAAGAAACTATGTTATTGGTATTTTAAGTAGCGCCTTTAGTGTTGTCCGTCATGCGGACGTATTAGCCCATCTGTATGGACCGGGTCATCTGACACCATC
1407	chaA	AAGCTTTGCTCGAAGAAACTATGTGGCTTTTCATTATTGTTGGGCGGTCGTAAGTTTGCCACCCAATATATGAATCTGTTTGGTGTATGGACCGGGTCATCTGACACCATC
1408	chaA	AAGCTTTGCTCGAAGAAACTATGTAGCCTTTCAGTGGTTATTCTTGAAGTCAGTTTGATTTCAGCTTTAATGGCAACCGGCGTGTATGGACCGGGTCATCTGACACCATC
1409	chaB	AAGCTTTGCTCGAAGAAACTATGGAAAGCGTAAAGCACGTTCTACCGTCTCATGCCCAGGATATCTATAAAGAAGCGTTCAATGTATGGACCGGGTCATCTGACACCATC
1410	chaB	AAGCTTTGCTCGAAGAAACTATGCTGGGCTGCTGTGAAGCATGAATATGCCAAAGGGGATGATGATAAATGGCATAAAAAATTGTATGGACCGGGTCATCTGACACCATC
1411	chaB	AAGCTTTGCTCGAAGAAACTATGGGCTGCTGTGAAGCATGAATATGCCAAAGGGGATGATGATAAATGGCATAAAAAATCGTTGTATGGACCGGGTCATCTGACACCATC
1412	chaB	AAGCTTTGCTCGAAGAAACTATGTGGGCTGCTGTGAAGCATGAATATGCCAAAGGGGATGATGATAAATGGCATAAAAAATCTGTATGGACCGGGTCATCTGACACCATC
1413	chaB	AAGCTTTGCTCGAAGAAACTATGAAAGCGTAAAGCACGTTCTACCGTCTCATGCCCAGGATATCTATAAAGAAGCGTTCAACTGTATGGACCGGGTCATCTGACACCATC
1414	chaC	AAGCTTTGCTCGAAGAAACTATGTTATCAAACTGGGAATGCAGGACGATGGGCTGAATGATTTGCTGGTATCGGTAAAAAAACTGTATGGACCGGGTCATCTGACACCATC
1415	chaC	AAGCTTTGCTCGAAGAAACTATGTGATGAATGCCGATTGTAAAACGGCATTTGGTGCCATTGAAGAATCACTCTTATGGTCAGTGTATGGACCGGGTCATCTGACACCATC
1416	chaC	AAGCTTTGCTCGAAGAAACTATGCTTGATGAATGCCGATTGTAAAACGGCATTTGGTGCCATTGAAGAATCACTCTTATGGTCTGTATGGACCGGGTCATCTGACACCATC
1417	chaC	AAGCTTTGCTCGAAGAAACTATGGTGATTTCTTGATGAATGCCGATTGTAAAACGGCATTTGGTGCCATTGAAGAATCACTCTTGTATGGACCGGGTCATCTGACACCATC
1418	chaC	AAGCTTTGCTCGAAGAAACTATGGTAAACGCCATTGTGTTTATTATGGACCCGCGACATCCAGAATATGAATCTGATACTCGCTGTATGGACCGGGTCATCTGACACCATC
1419	chbA	AAGCTTTGCTCGAAGAAACTATGGTCCATGCTTGCGCGTGAACTGATTACTGAATTAATTGAGCTTCATGAAAAACTGAAGGCTGTATGGACCGGGTCATCTGACACCATC
1420	chbA	AAGCTTTGCTCGAAGAAACTATGTCCATGCTTGCGCGTGAACTGATTACTGAATTAATTGAGCTTCATGAAAAACTGAAGGCATGTATGGACCGGGTCATCTGACACCATC
1421	chbA	AAGCTTTGCTCGAAGAAACTATGCCATGCTTGCGCGTGAACTGATTACTGAATTAATTGAGCTTCATGAAAAACTGAAGGCATTGTATGGACCGGGTCATCTGACACCATC
1422	chbA	AAGCTTTGCTCGAAGAAACTATGCGTCCATGCTTGCGCGTGAACTGATTACTGAATTAATTGAGCTTCATGAAAAACTGAAGGTGTATGGACCGGGTCATCTGACACCATC
1423	chbA	AAGCTTTGCTCGAAGAAACTATGTCAGGATCATTTAATGACGTCCATGCTTGCGCGTGAACTGATTACTGAATTAATTGAGCTTGTATGGACCGGGTCATCTGACACCATC
1424	chbB	AAGCTTTGCTCGAAGAAACTATGGGCATGTCTACCTCTTTACTGGTATCAAAAATGCGCGCACAGGCAGAAAAATATGAAGTTTGTATGGACCGGGTCATCTGACACCATC
1425	chbB	AAGCTTTGCTCGAAGAAACTATGATTGCTTATATGTTGCCCGAAATCCAGCGTTTGTTACCCAACAAACCGGTTGAAGTAATTTGTATGGACCGGGTCATCTGACACCATC
1426	chbB	AAGCTTTGCTCGAAGAAACTATGTTATATGTTGCCCGAAATCCAGCGTTTGTTACCCAACAAACCGGTTGAAGTAATTGACTTGTATGGACCGGGTCATCTGACACCATC
1427	chbB	AAGCTTTGCTCGAAGAAACTATGGATTGCTTATATGTTGCCCGAAATCCAGCGTTTGTTACCCAACAAACCGGTTGAAGTAATTGTATGGACCGGGTCATCTGACACCATC
1428	chbB	AAGCTTTGCTCGAAGAAACTATGTGTCTACCTCTTTACTGGTATCAAAAATGCGCGCACAGGCAGAAAAATATGAAGTTCCGTGTATGGACCGGGTCATCTGACACCATC
1429	chbC	AAGCTTTGCTCGAAGAAACTATGAACAAAGCACAAAATGCGATTGATAAAGAAGAGAGCGAAGAAGATATCGCTAACGCCCTGTGTATGGACCGGGTCATCTGACACCATC
1430	chbC	AAGCTTTGCTCGAAGAAACTATGAACAACGTTTTTCTAAGCTTTGGGGAGGGGTCGTTTTTTTATTCCTTAGGTATTCGCCTCTGTATGGACCGGGTCATCTGACACCATC
1431	chbC	AAGCTTTGCTCGAAGAAACTATGTTATTGCATCGCTTGAAAAGGTACTCCTCCCTTTTGCAGTTAAAATAGGAAAGCAGCCACTGTATGGACCGGGTCATCTGACACCATC
1432	chbC	AAGCTTTGCTCGAAGAAACTATGATAACGGAACATTAGGAATAATGTCTTTAATGGCACCGTTCTTTATTGGCATGGCGCTGGTGTATGGACCGGGTCATCTGACACCATC
1433	chbC	AAGCTTTGCTCGAAGAAACTATGGCGAATATCATCTCCGGGATTATTATTGGCCTGGTGGTGGCAGAAATGTTTACCTTTATTTGTATGGACCGGGTCATCTGACACCATC
1434	chbF	AAGCTTTGCTCGAAGAAACTATGATTACTTCAAGCAGAAAGAGATGCTGGCTATTGAAATGGGCGAATACTACAAAGGCGGTGTATGGACCGGGTCATCTGACACCATC
1435	chbF	AAGCTTTGCTCGAAGAAACTATGCCATTTAGTGAGGGCTTAATTCGTTCGTTGAATCTGCTGCCATGTTCTTATCTGCTGTTGTATGGACCGGGTCATCTGACACCATC
1436	chbF	AAGCTTTGCTCGAAGAAACTATGGAACTGGATGAACGTATTCCATTAAGTCATGGTTATCTTGGTCAGGAAACCAACGGCGTGTATGGACCGGGTCATCTGACACCATC
1437	chbF	AAGCTTTGCTCGAAGAAACTATGTAAAAGATGTCGAAGAACTTTGTCCGAATGCATGGGTGATTAACTTCACTAACCCGGCTGTATGGACCGGGTCATCTGACACCATC
1438	chbF	AAGCTTTGCTCGAAGAAACTATGTTTGTTCGGCCTCAACCATATGGTGTTCATTAAGGATGTGCTGATAAATGGCAAGTCGTGTATGGACCGGGTCATCTGACACCATC
1439	chbG	AAGCTTTGCTCGAAGAAACTATGTACCGCTGGAAGAAATTACTCAGGAGCTTGTCAGTCAGTATTTGCGTTTCATTGAGCTATTGTATGGACCGGGTCATCTGACACCATC
1440	chbG	AAGCTTTGCTCGAAGAAACTATGGGCAGAAGAAGATGCTTTACCGCTGGAAGAAATTACTCAGGAGCTTGTCAGTCAGTATTTTGTATGGACCGGGTCATCTGACACCATC
1441	chbG	AAGCTTTGCTCGAAGAAACTATGTTACTCAGGAGCTTGTCAGTCAGTATTTGCGTTTCATTGAGCTATTTGGACGCAAACCTATGTATGGACCGGGTCATCTGACACCATC
1442	chbG	AAGCTTTGCTCGAAGAAACTATGAGAAGAAGATGCTTTACCGCTGGAAGAAATTACTCAGGAGCTTGTCAGTCAGTATTTGCGTGTATGGACCGGGTCATCTGACACCATC
1443	chbG	AAGCTTTGCTCGAAGAAACTATGATGCTTTACCGCTGGAAGAAATTACTCAGGAGCTTGTCAGTCAGTATTTGCGTTTCATTGTGTATGGACCGGGTCATCTGACACCATC
1444	chbR	AAGCTTTGCTCGAAGAAACTATGTTTACTCTGGTATTAACCGGGCGTTATTTCCAGGAGATTAACGGTAAGCGCGTGTTACTGTATGGACCGGGTCATCTGACACCATC
1445	chbR	AAGCTTTGCTCGAAGAAACTATGGTCATTAACCGTTTACGTCATTACCGCGAAGAACAGGTGATTGATGATGTACCGCAGTGTGTATGGACCGGGTCATCTGACACCATC
1446	chbR	AAGCTTTGCTCGAAGAAACTATGGCGAGCGACTCAACGATATTATGGCAAAACGCCAATGCAGATTATTAATGAAATCCGTATGTATGGACCGGGTCATCTGACACCATC
1447	chbR	AAGCTTTGCTCGAAGAAACTATGGAAAAGATGCATGATAAAGAGCAGTTTAGTGAATCGGCGCTGGAGAATATGGTGGCGTTGTGTATGGACCGGGTCATCTGACACCATC
1448	chbR	AAGCTTTGCTCGAAGAAACTATGTCTTCATTGAATTTCCGCGAAACAGGGCTGGAAGAGTTTGTTGAGATGGTTACTTTTTATTGTATGGACCGGGTCATCTGACACCATC
1449	cheA	AAGCTTTGCTCGAAGAAACTATGTCAGATTACCTTTGAAACAGTAGAAGTCTCGCCAAAAATATCCACCCCACCAGTGCTTAATGTATGGACCGGGTCATCTGACACCATC
1450	cheA	AAGCTTTGCTCGAAGAAACTATGTAATTGGTCAACACCAGGTTGTGGTTAAAAACCTTGAAAGTAACTATCGCAAAGTCCCCGTGTATGGACCGGGTCATCTGACACCATC
1451	cheA	AAGCTTTGCTCGAAGAAACTATGCGAAGATGACATCACAGCGGTACTCTGTTTTGTGATTGAAGCCGATCAGATTACCTTTGATGTATGGACCGGGTCATCTGACACCATC
1452	cheA	AAGCTTTGCTCGAAGAAACTATGTAAGCGATTTTTATCAGACATTTTTTGATGAAGCGGACGAACTGTTGGCTGACATGGAGCTGTATGGACCGGGTCATCTGACACCATC
1453	cheA	AAGCTTTGCTCGAAGAAACTATGGTAGAAAAGGTTGATCAATTAATTAACCTCGTCGGCGAGCTGGTTATCACCCAGTCCATGTGTATGGACCGGGTCATCTGACACCATC
1454	cheB	AAGCTTTGCTCGAAGAAACTATGCAGGTAAGCCAGCAAATGTTGGCAAAAATTAGTGCCGGACAGGCGATACGTATTTAATGTATGGACCGGGTCATCTGACACCATC
1455	cheB	AAGCTTTGCTCGAAGAAACTATGGATAGATTTTGTCACCAAACCGCAACTGGGTATTCGCGAAGGTATGCTGGCGTATAACTGTATGGACCGGGTCATCTGACACCATC
1456	cheB	AAGCTTTGCTCGAAGAAACTATGGTTGAGTTCTGAAAAACTGATTGCGATTGGTGCTTCAACGGGTGGAACTGAGGCAATTCTGTATGGACCGGGTCATCTGACACCATC
1457	cheB	AAGCTTTGCTCGAAGAAACTATGCTTAATAAGCTTTGCCAGATCGGGGTTAAAGAAGCCGAAGACGGAGAACGTGTCTTTGTATGGACCGGGTCATCTGACACCATC
1458	cheB	AAGCTTTGCTCGAAGAAACTATGGTCTGCGAAGTGGTCGATCTTAGCCAGGTAAGCCAGCAAATGTTGGCAAAAATTAGTGTATGGACCGGGTCATCTGACACCATC
1459	cheR	AAGCTTTGCTCGAAGAAACTATGTGCGATCTTCTGTCGTAACGTCATGATCTACTTCGATCAAACTACCCAGCAGGAGATTTTTGTATGGACCGGGTCATCTGACACCATC
1460	cheR	AAGCTTTGCTCGAAGAAACTATGGATGCGATCTTCTGTCGTAACGTCATGATCTACTTCGATCAAACTACCCAGCAGGAGATTTGTATGGACCGGGTCATCTGACACCATC
1461	cheR	AAGCTTTGCTCGAAGAAACTATGGTTTGATGCGATCTTCTGTCGTAACGTCATGATCTACTTCGATCAAACTACCCAGCAGGTGTATGGACCGGGTCATCTGACACCATC
1462	cheR	AAGCTTTGCTCGAAGAAACTATGCGTTTGATGCGATCTTCTGTCGTAACGTCATGATCTACTTCGATCAAACTACCCAGCAGTGTATGGACCGGGTCATCTGACACCATC
1463	cheR	AAGCTTTGCTCGAAGAAACTATGTTTGATGCGATCTTCTGTCGTAACGTCATGATCTACTTCGATCAAACTACCCAGCAGGAGTGTATGGACCGGGTCATCTGACACCATC
1464	cheW	AAGCTTTGCTCGAAGAAACTATGTTGTTGACTTACGAATTAAGTTCAGCCAGGTGGATGTGGACTATAACGACAACACGGTAGTGTATGGACCGGGTCATCTGACACCATC
1465	cheW	AAGCTTTGCTCGAAGAAACTATGTATTGTGCCGATTGTTGACTTACGAATTAAGTTCAGCCAGGTGGATGTGGACTATAACGATGTATGGACCGGGTCATCTGACACCATC
1466	cheW	AAGCTTTGCTCGAAGAAACTATGATTGTTGACTTACGAATTAAGTTCAGCCAGGTGGATGTGGACTATAACGACAACACGGTATGTATGGACCGGGTCATCTGACACCATC
1467	cheW	AAGCTTTGCTCGAAGAAACTATGATTAAGTTCAGCCAGGTGGATGTGGACTATAACGACAACACGGTAGTTATCGTCCTGAATTGTATGGACCGGGTCATCTGACACCATC
1468	cheW	AAGCTTTGCTCGAAGAAACTATGATTGTGCCGATTGTTGACTTACGAATTAAGTTCAGCCAGGTGGATGTGGACTATAACGACTGTATGGACCGGGTCATCTGACACCATC
1469	cheY	AAGCTTTGCTCGAAGAAACTATGAAAGAACTTAAATTTTTGGTTGTGGATGACTTTTCCACCATGCGACGCATAGTGCGTAACTGTATGGACCGGGTCATCTGACACCATC
1470	cheY	AAGCTTTGCTCGAAGAAACTATGTGGCGGATAAAGAACTTAAATTTTTGGTTGTGGATGACTTTTCCACCATGCGACGCATAGTGTATGGACCGGGTCATCTGACACCATC
1471	cheY	AAGCTTTGCTCGAAGAAACTATGGGCGGATAAAGAACTTAAATTTTTGGTTGTGGATGACTTTTCCACCATGCGACGCATAGTTGTATGGACCGGGTCATCTGACACCATC
1472	cheY	AAGCTTTGCTCGAAGAAACTATGAAGAACTTAAATTTTTGGTTGTGGATGACTTTTCCACCATGCGACGCATAGTGCGTAACCTGTATGGACCGGGTCATCTGACACCATC
1473	cheY	AAGCTTTGCTCGAAGAAACTATGGATAAAGAACTTAAATTTTTGGTTGTGGATGACTTTTCCACCATGCGACGCATAGTGCGTTGTATGGACCGGGTCATCTGACACCATC
1474	cheZ	AAGCTTTGCTCGAAGAAACTATGGTAACAGATACACGACAATTTCTGGCAGATGTACCCGCGCATACCAGCTTTACTAACGTGTATGGACCGGGTCATCTGACACCATC
1475	cheZ	AAGCTTTGCTCGAAGAAACTATGGTCCAAAACGTGAAAACCAGAGTTTGCTTAATGGACCTCAGGTCGATACCAGCAAAGTGTATGGACCGGGTCATCTGACACCATC
1476	cheZ	AAGCTTTGCTCGAAGAAACTATGATCAGGATCAAATGGAGAAATCAGCAAAAGCGTTAACCCAACGTTGGGATGACTGGTTTTGTATGGACCGGGTCATCTGACACCATC
1477	cheZ	AAGCTTTGCTCGAAGAAACTATGCTGGTAACAGATACACGACAATTTCTGGCAGATGTACCCGCGCATACCAGCTTTACTAATGTATGGACCGGGTCATCTGACACCATC
1478	cheZ	AAGCTTTGCTCGAAGAAACTATGGGTAACAGATACACGACAATTTCTGGCAGATGTACCCGCGCATACCAGCTTTACTAATGTATGGACCGGGTCATCTGACACCATC
1479	chiA	AAGCTTTGCTCGAAGAAACTATGTTCACAATTGAAAGGCCTCCATCCCAATAAGAGCGATGCAGAAATTGACGCTATGATGTGTATGGACCGGGTCATCTGACACCATC
[truncated: 28,442 more rows]

[truncated: 8 more sheets: Table S3 C2C costs, Table S4 strain list, Table S5 - Sample Summary, Table S6 - DGE , Table S7 - DGE 10x, Table S8 - DGE Bulk Median, Table S9 genes in venn , Table S10 genes in volcano plot]
